# Supplementary material for: Growth-regulating factor 15-mediated vascular cambium differentiation positively regulates wood formation in hybrid poplar (Populus alba × P. glandulosa)
Source: Front Plant Sci. 2024 Feb 15;15:1343312. doi: 10.3389/fpls.2024.1343312 (PMC10902170; doi:10.3389/fpls.2024.1343312)
Supplement: Supplementary file 2 [file Table_1.xlsx]

## Sheet: Table S1
Table S1. Significant differentially expressed genes in PagGRF15 overexpression plants.
Gene	log2FC	FDR	Regulation	AT accession	Annotation
Potri.001G000800	-3.54662	5.06671e-08	down	AT1G55550.1	P-loop containing nucleoside triphosphate hydrolases superfamily protein
Potri.001G002300	-1.22296	0.000962255	down	AT5G56460.1	Protein kinase superfamily protein
Potri.001G004100	-1.22817	2.05719e-12	down	AT5G56540.1	arabinogalactan protein 14
Potri.001G007300	1.44555	2.54469e-12	up	AT3G13620.1	Amino acid permease family protein
Potri.001G009600	-1.21536	1.41449e-07	down	AT1G69770.1	chromomethylase 3
Potri.001G011000	1.10921	0.000118302	up	AT4G08780.1	Peroxidase superfamily protein
Potri.001G011200	1.51443	0.00773625	up	AT3G49120.1	peroxidase CB
Potri.001G011300	1.52097	0.00311492	up	AT3G49120.1	peroxidase CB
Potri.001G013400	-6.86898	1.86028e-17	down	AT5G19640.1	Major facilitator superfamily protein
Potri.001G013600	1.12603	0.00805667	up	AT2G44430.1	DNA-binding bromodomain-containing protein
Potri.001G015500	4.60573	7.41865e-31	up	AT3G45140.1	lipoxygenase 2
Potri.001G015600	4.06847	4.52327e-45	up	AT3G45140.1	lipoxygenase 2
Potri.001G016000	-1.24234	7.78307e-05	down	AT1G73730.1	ETHYLENE-INSENSITIVE3-like 3
Potri.001G016300	1.73184	2.64704e-08	up	AT5G12890.1	UDP-Glycosyltransferase superfamily protein
Potri.001G017000	1.56726	1.90906e-11	up	AT4G12070.1
Potri.001G017500	4.78122	3.1579e-17	up	AT3G20820.1	Leucine-rich repeat (LRR) family protein
Potri.001G018300	-1.13833	5.14929e-09	down	AT3G20830.1	AGC (cAMP-dependent, cGMP-dependent and protein kinase C) kinase family protein
Potri.001G018700	-1.07797	1.03204e-06	down	AT3G20860.1	NIMA-related kinase 5
Potri.001G019200	-1.03231	0.00189159	down	AT1G76870.1
Potri.001G020600	-2.34536	1.82109e-07	down	AT2G41560.1	autoinhibited Ca(2+)-ATPase, isoform 4
Potri.001G020800	1.82768	4.28131e-13	up	AT2G41540.1	6-phosphogluconate dehydrogenase family protein
Potri.001G021000	1.01288	2.14542e-05	up	AT5G13460.1	IQ-domain 11
Potri.001G024800	3.10586	2.56627e-09	up	AT2G38760.1	annexin 3
Potri.001G024900	4.50742	7.77497e-16	up	AT2G38750.1	annexin 4
Potri.001G025200	2.37928	1.93352e-30	up	AT1G33720.1	cytochrome P450, family 76, subfamily C, polypeptide 6
Potri.001G025400	2.84519	1.7644e-31	up	AT3G14470.1	NB-ARC domain-containing disease resistance protein
Potri.001G026200	2.10429	4.67341e-17	up	AT3G61790.1	Protein with RING/U-box and TRAF-like domains
Potri.001G027100	-3.2556	0.00011653	down	AT3G54450.1	Major facilitator superfamily protein
Potri.001G028400	1.10253	2.35005e-09	up	AT3G54390.1	sequence-specific DNA binding transcription factors
Potri.001G036900	-1.35639	2.57271e-10	down	AT3G21240.1	4-coumarate:CoA ligase 2
Potri.001G037000	2.40551	1.85642e-38	up	AT5G23570.1	XS domain-containing protein / XS zinc finger domain-containing protein-related
Potri.001G041400	-1.23758	0.0016025	down	AT1G16070.1	tubby like protein 8
Potri.001G042600	-1.37652	3.71565e-11	down	AT3G12580.1	heat shock protein 70
Potri.001G042700	-2.02861	3.79091e-29	down	AT1G16030.1	heat shock protein 70B
Potri.001G043600	-2.28248	2.33628e-25	down	AT5G15350.1	early nodulin-like protein 17
Potri.001G043900	-1.59793	0.000398546	down	AT1G19780.1	cyclic nucleotide gated channel 8
Potri.001G044500	2.73975	6.44899e-15	up	AT1G80840.1	WRKY DNA-binding protein 40
Potri.001G047200	-1.32936	5.15181e-13	down	AT1G76280.3	Tetratricopeptide repeat (TPR)-like superfamily protein
Potri.001G047800	-1.17708	1.15871e-06	down	AT1G80690.1	PPPDE putative thiol peptidase family protein
Potri.001G048500	-1.47746	0.000127959	down	AT2G25220.1	Protein kinase superfamily protein
Potri.001G050100	2.07413	9.548e-07	up	AT2G02230.1	phloem protein 2-B1
Potri.001G051600	1.32961	0.00178247	up	AT5G13930.1	Chalcone and stilbene synthase family protein
Potri.001G052300	-2.87823	1.90829e-51	down	AT4G13710.1	Pectin lyase-like superfamily protein
Potri.001G053700	2.32168	1.18821e-05	up	AT2G33180.1
Potri.001G054400	-1.23486	1.89485e-12	down	AT3G23990.1	heat shock protein 60
Potri.001G054600	-2.50818	1.60413e-06	down	AT5G60020.1	laccase 17
Potri.001G055100	-1.89051	2.15138e-05	down	AT1G27920.1	microtubule-associated protein 65-8
Potri.001G055300	-1.2321	3.16795e-11	down	AT1G67360.1	Rubber elongation factor protein (REF)
Potri.001G056600	2.09335	2.60916e-08	up	AT5G43260.1	chaperone protein dnaJ-related
Potri.001G059500	1.49345	0.000935757	up	AT1G27990.1
Potri.001G060400	2.90836	0.000724149	up	AT5G50760.1	SAUR-like auxin-responsive protein family
Potri.001G060600	-3.03987	0.000425748	down	AT5G14070.1	Thioredoxin superfamily protein
Potri.001G060900	5.63533	3.78337e-139	up	AT5G13170.1	senescence-associated gene 29
Potri.001G065600	1.56268	7.71386e-06	up	AT2G33540.1	C-terminal domain phosphatase-like 3
Potri.001G065900	-2.2275	3.08191e-25	down	AT1G28110.1	serine carboxypeptidase-like 45
Potri.001G066500	2.70035	9.27174e-12	up	AT5G36930.2	Disease resistance protein (TIR-NBS-LRR class) family
Potri.001G067000	1.55203	0.000332257	up	AT1G17100.1	SOUL heme-binding family protein
Potri.001G067700	-1.34063	0.00208378	down	AT1G57820.1	Zinc finger (C3HC4-type RING finger) family protein
Potri.001G068100	-2.25386	1.60185e-34	down	AT1G27440.1	Exostosin family protein
Potri.001G068400	-1.09953	3.40218e-08	down	AT1G11680.1	CYTOCHROME P450 51G1
Potri.001G071000	1.91389	7.38414e-26	up	AT5G13870.1	xyloglucan endotransglucosylase/hydrolase 5
Potri.001G073900	-2.40306	3.50616e-12	down	AT4G20260.1	plasma-membrane associated cation-binding protein 1
Potri.001G075600	-1.56378	1.64405e-07	down	AT1G30900.1	VACUOLAR SORTING RECEPTOR 6
Potri.001G077200	4.62782	1.3843e-37	up
Potri.001G077300	1.96711	1.35262e-05	up
Potri.001G079800	3.85037	3.08333e-05	up	AT5G51190.1	Integrase-type DNA-binding superfamily protein
Potri.001G081400	-1.88115	6.12864e-05	down	AT1G31320.1	LOB domain-containing protein 4
Potri.001G082300	-1.51361	3.45039e-05	down	AT1G31335.1
Potri.001G082500	-2.57413	0.000466154	down	AT4G24110.1
Potri.001G083600	1.58211	0.00113961	up	AT1G14430.1	glyoxal oxidase-related protein
Potri.001G084000	1.63764	1.46265e-20	up	AT1G64660.1	methionine gamma-lyase
Potri.001G084400	2.17342	5.7116e-20	up	AT4G24120.1	YELLOW STRIPE like 1
Potri.001G086100	1.28877	2.77362e-06	up	AT3G05675.1	BTB/POZ domain-containing protein
Potri.001G087100	1.36672	5.89635e-06	up	AT4G24040.1	trehalase 1
Potri.001G087500	-1.49871	2.58949e-09	down	AT5G42020.1	Heat shock protein 70 (Hsp 70) family protein
Potri.001G088800	1.70293	1.26243e-22	up	AT5G42050.1	DCD (Development and Cell Death) domain protein
Potri.001G089700	1.08415	0.000961444	up	AT4G23950.1	Galactose-binding protein
Potri.001G090500	-2.55973	0.000198277	down	AT4G10955.1	alpha/beta-Hydrolases superfamily protein
Potri.001G091000	2.31428	0.000113274	up	AT4G23895.3	Pleckstrin homology (PH) domain-containing protein
Potri.001G092100	1.92855	9.00613e-06	up	AT2G29380.1	highly ABA-induced PP2C gene 3
Potri.001G092200	-1.64963	9.00724e-13	down	AT1G64390.1	glycosyl hydrolase 9C2
Potri.001G092600	-1.55538	1.05447e-17	down	AT5G41860.1
Potri.001G093700	-1.22254	7.43731e-10	down	AT4G11080.1	HMG (high mobility group) box protein
Potri.001G093900	2.06468	3.66989e-07	up	AT3G61670.1	Protein of unknown function (DUF3133)
Potri.001G096400	-1.09965	0.000827609	down	AT5G41610.1	cation/H+ exchanger 18
Potri.001G096900	-3.98739	8.84444e-22	down	AT4G23690.1	Disease resistance-responsive (dirigent-like protein) family protein
Potri.001G097300	-1.01596	2.83889e-08	down	AT3G18440.1	aluminum-activated malate transporter 9
Potri.001G098000	-1.22282	0.000837342	down	AT1G64080.1
Potri.001G098300	1.1444	2.95942e-07	up	AT1G64060.1	respiratory burst oxidase protein F
Potri.001G099100	-2.18955	7.23885e-07	down	AT1G63990.1	sporulation 11-2
Potri.001G099200	-1.21861	2.48773e-09	down	AT5G41560.1
Potri.001G099300	1.68272	7.38818e-05	up	AT1G63970.1	isoprenoid F
Potri.001G099400	2.98818	4.57797e-13	up	AT4G11280.1	1-aminocyclopropane-1-carboxylic acid (acc) synthase 6
Potri.001G099800	-1.93278	0.000205451	down	AT1G63910.1	myb domain protein 103
Potri.001G100100	-2.27348	1.44794e-37	down	AT1G69230.1	SPIRAL1-like2
Potri.001G100800	2.61695	0.000178819	up	AT5G41410.1	POX (plant homeobox) family protein
Potri.001G102400	2.00105	1.54414e-06	up	AT4G11650.1	osmotin 34
Potri.001G104600	-2.78737	6.94906e-21	down	AT5G12250.1	beta-6 tubulin
Potri.001G105200	1.16348	4.58023e-07	up	AT4G11600.1	glutathione peroxidase 6
Potri.001G105900	1.79679	5.50235e-23	up	AT3G48990.1	AMP-dependent synthetase and ligase family protein
Potri.001G106100	-3.31703	2.24177e-60	down	AT5G23860.1	tubulin beta 8
Potri.001G106600	-1.47069	1.48124e-14	down	AT1G63430.1	Leucine-rich repeat protein kinase family protein
Potri.001G107000	-2.61597	1.99374e-12	down	AT5G23750.1	Remorin family protein
Potri.001G107600	2.241	0.00697631	up	AT4G11650.1	osmotin 34
Potri.001G108300	4.57118	2.99351e-23	up	AT2G45760.1	BON association protein 2
Potri.001G108700	-2.04096	3.51212e-12	down	AT1G63120.1	RHOMBOID-like 2
Potri.001G109400	-1.73252	1.91228e-13	down	AT1G63100.1	GRAS family transcription factor
Potri.001G110700	3.69774	1.06943e-11	up	AT5G51990.1	C-repeat-binding factor 4
Potri.001G110900	1.88504	3.72426e-05	up	AT4G23020.2
Potri.001G111000	1.24693	0.000699571	up	AT4G23010.3	UDP-galactose transporter 2
Potri.001G111400	1.17204	4.25991e-09	up	AT4G22990.1	Major Facilitator Superfamily with SPX (SYG1/Pho81/XPR1) domain-containing protein
Potri.001G112800	-1.3516	0.000160344	down	AT4G22900.1	Protein of unknown function (DUF1191)
Potri.001G114900	-1.88299	3.55367e-05	down	AT3G60890.2	protein binding
Potri.001G118500	1.22228	3.08162e-07	up	AT4G12320.1	cytochrome P450, family 706, subfamily A, polypeptide 6
Potri.001G118800	-1.4849	0.000756214	down	AT4G12350.1	myb domain protein 42
Potri.001G119500	-1.17818	2.40421e-10	down	AT4G12400.2	stress-inducible protein, putative
Potri.001G120200	-1.59549	1.83436e-09	down	AT2G45190.1	Plant-specific transcription factor YABBY family protein
Potri.001G120300	-1.53214	1.29482e-18	down	AT4G12420.1	Cupredoxin superfamily protein
Potri.001G121400	-1.48672	0.000168042	down	AT4G22570.1	adenine phosphoribosyl transferase 3
Potri.001G121600	-1.52526	4.79668e-05	down	AT4G22560.1
Potri.001G123400	1.6136	1.606e-06	up	AT5G44800.1	chromatin remodeling 4
Potri.001G125800	1.02462	0.00604033	up	AT5G07670.1	RNI-like superfamily protein
Potri.001G126100	-1.97179	3.53738e-27	down	AT5G61480.1	Leucine-rich repeat protein kinase family protein
Potri.001G127100	-1.12665	1.60426e-08	down	AT5G45290.1	RING/U-box superfamily protein
Potri.001G128100	1.04748	0.000163422	up	AT1G31490.1	HXXXD-type acyl-transferase family protein
Potri.001G131600	2.42415	6.82791e-07	up
Potri.001G132800	1.70512	8.41394e-15	up	AT1G32120.1
Potri.001G133000	3.04209	1.32862e-12	up	AT4G34135.1	UDP-glucosyltransferase 73B2
Potri.001G133400	1.42447	4.72851e-15	up	AT5G45580.1	Homeodomain-like superfamily protein
Potri.001G135100	-2.36198	1.91531e-07	down
Potri.001G136100	-1.37032	0.00559949	down	AT1G32170.1	xyloglucan endotransglucosylase/hydrolase 30
Potri.001G136200	1.24617	7.62745e-05	up	AT3G03050.1	cellulose synthase-like D3
Potri.001G136400	-1.84981	2.55492e-10	down	AT1G32190.1	alpha/beta-Hydrolases superfamily protein
Potri.001G137600	1.02719	0.00927769	up	AT1G32240.1	Homeodomain-like superfamily protein
Potri.001G140200	1.90313	2.1074e-19	up	AT4G17790.1	SNARE associated Golgi protein family
Potri.001G140900	-2.18637	0.00107379	down	AT4G17920.1	RING/U-box superfamily protein
Potri.001G141500	1.50663	1.1594e-08	up	AT4G17900.1	PLATZ transcription factor family protein
Potri.001G144400	2.2271	1.16089e-09	up	AT5G46590.1	NAC domain containing protein 96
Potri.001G144700	1.16689	5.32753e-06	up	AT2G35350.1	poltergeist like 1
Potri.001G145700	1.65985	0.00729121	up	AT2G35390.2	Phosphoribosyltransferase family protein
Potri.001G145800	-1.87695	3.76763e-07	down	AT2G35380.1	Peroxidase superfamily protein
Potri.001G147400	2.32831	0.000121031	up	AT2G38740.1	Haloacid dehalogenase-like hydrolase (HAD) superfamily protein
Potri.001G147700	-1.7182	3.63903e-13	down	AT1G14390.1	Leucine-rich repeat protein kinase family protein
Potri.001G155000	1.14658	3.32084e-05	up	AT4G16790.1	hydroxyproline-rich glycoprotein family protein
Potri.001G155500	1.06938	1.06249e-07	up	AT4G16760.1	acyl-CoA oxidase 1
Potri.001G157600	1.83117	0.000767995	up	AT5G47470.1	Nodulin MtN21 /EamA-like transporter family protein
Potri.001G158000	2.88515	3.37695e-11	up	AT2G35710.1	Nucleotide-diphospho-sugar transferases superfamily protein
Potri.001G158400	1.98347	0.00024318	up	AT4G12520.1	Bifunctional inhibitor/lipid-transfer protein/seed storage 2S albumin superfamily protein
Potri.001G158600	2.18493	6.13371e-18	up	AT4G16563.1	Eukaryotic aspartyl protease family protein
Potri.001G160100	1.17769	8.14323e-08	up	AT4G20070.1	allantoate amidohydrolase
Potri.001G161400	1.66327	1.1151e-14	up	AT1G17260.1	autoinhibited H(+)-ATPase isoform 10
Potri.001G162000	-1.16976	8.91767e-06	down	AT1G72310.1	RING/U-box superfamily protein
Potri.001G163000	-1.22155	4.07746e-10	down	AT1G53860.1	Remorin family protein
Potri.001G163100	1.2031	6.32876e-05	up	AT3G14280.1
Potri.001G163400	2.3571	0.00129598	up	AT1G53903.1	Protein of unknown function (DUF581)
Potri.001G164800	1.67875	0.000240063	up	AT1G54070.1	Dormancy/auxin associated family protein
Potri.001G166900	1.99523	9.29716e-13	up	AT1G72510.1	Protein of unknown function (DUF1677)
Potri.001G167700	2.23585	3.78117e-34	up	AT1G17420.1	lipoxygenase 3
Potri.001G169500	-3.32964	2.79874e-10	down	AT1G72570.1	Integrase-type DNA-binding superfamily protein
Potri.001G173700	1.09518	0.00411226	up	AT1G52700.1	alpha/beta-Hydrolases superfamily protein
Potri.001G175200	2.26801	6.6904e-26	up	AT1G80300.1	nucleotide transporter 1
Potri.001G175400	1.34315	7.3868e-07	up	AT1G52770.1	Phototropic-responsive NPH3 family protein
Potri.001G177100	-1.43857	3.83976e-05	down	AT1G80370.1	Cyclin A2;4
Potri.001G177500	-1.56047	0.000455531	down	AT3G15540.1	indole-3-acetic acid inducible 19
Potri.001G184300	-2.16116	0.000347058	down	AT5G60020.1	laccase 17
Potri.001G186700	-1.3547	2.64155e-14	down	AT3G16240.1	delta tonoplast integral protein
Potri.001G187300	-1.92213	0.000177696	down	AT1G52155.1
Potri.001G192600	-3.18311	1.01644e-67	down	AT1G52560.1	HSP20-like chaperones superfamily protein
Potri.001G192800	2.39766	8.16632e-06	up	AT1G52565.1
Potri.001G196700	1.00657	0.00594826	up	AT3G13780.1	SMAD/FHA domain-containing protein
Potri.001G198500	-3.28753	2.53892e-05	down	AT1G17550.1	homology to ABI2
Potri.001G198900	1.1308	1.96881e-05	up	AT1G72790.1	hydroxyproline-rich glycoprotein family protein
Potri.001G200400	-1.129	2.73186e-10	down	AT3G13750.1	beta galactosidase 1
Potri.001G200700	1.00865	0.00702685	up	AT1G17620.1	Late embryogenesis abundant (LEA) hydroxyproline-rich glycoprotein family
Potri.001G201500	1.73636	2.33637e-06	up	AT1G52510.1	alpha/beta-Hydrolases superfamily protein
Potri.001G204100	-1.65695	0.000164607	down	AT3G15820.1	phosphatidic acid phosphatase-related / PAP2-related
Potri.001G204600	-1.42132	0.000102856	down	AT1G15760.1	Sterile alpha motif (SAM) domain-containing protein
Potri.001G206800	-1.251	0.000917993	down	AT5G64570.1	beta-D-xylosidase 4
Potri.001G209300	-1.35038	1.18003e-14	down	AT2G02850.1	plantacyanin
Potri.001G213700	1.06999	5.05105e-05	up	AT2G27880.1	Argonaute family protein
Potri.001G217700	-1.34618	5.06014e-12	down	AT3G23750.1	Leucine-rich repeat protein kinase family protein
Potri.001G218800	2.71218	1.58809e-07	up	AT3G44350.2	NAC domain containing protein 61
Potri.001G220900	3.92791	5.4891e-35	up	AT1G20030.2	Pathogenesis-related thaumatin superfamily protein
Potri.001G225700	1.21364	0.00278871	up	AT2G01290.1	ribose-5-phosphate isomerase 2
Potri.001G227000	-1.88424	2.16531e-23	down	AT2G44500.1	O-fucosyltransferase family protein
Potri.001G228200	-2.2152	0.00454373	down	AT5G60900.1	receptor-like protein kinase 1
Potri.001G232200	-1.90243	0.00998983	down	AT2G31930.1
Potri.001G234600	3.42108	5.49993e-17	up	AT2G39380.1	exocyst subunit exo70 family protein H2
Potri.001G235700	2.66769	6.19052e-17	up	AT5G59790.1	Domain of unknown function (DUF966)
Potri.001G235800	3.88679	4.57326e-23	up	AT2G37430.1	C2H2 and C2HC zinc fingers superfamily protein
Potri.001G237700	-2.53807	1.74032e-38	down	AT5G59305.1
Potri.001G238700	-2.65676	5.71551e-50	down	AT1G53540.1	HSP20-like chaperones superfamily protein
Potri.001G238800	-1.05268	2.95832e-09	down	AT2G28840.1	XB3 ortholog 1 in Arabidopsis thaliana
Potri.001G239200	1.42257	0.000543955	up	AT3G46540.1	ENTH/VHS family protein
Potri.001G239500	-1.04188	0.00599838	down	AT5G02390.1	Protein of unknown function (DUF3741)
Potri.001G239700	1.42282	1.65587e-12	up
Potri.001G240600	1.25226	5.82324e-10	up	AT1G03230.1	Eukaryotic aspartyl protease family protein
Potri.001G240700	-1.32353	3.69311e-06	down	AT1G13790.1	XH/XS domain-containing protein
Potri.001G240900	-1.934	4.58876e-27	down	AT2G39700.1	expansin A4
Potri.001G241300	-1.63944	3.09698e-08	down	AT2G29050.1	RHOMBOID-like 1
Potri.001G241800	1.85005	3.8337e-23	up	AT1G07530.1	SCARECROW-like 14
Potri.001G242100	5.7181	5.36258e-14	up	AT1G07530.1	SCARECROW-like 14
Potri.001G245300	-1.2914	0.000415638	down	AT1G07420.1	sterol 4-alpha-methyl-oxidase 2-1
Potri.001G246700	-1.17177	1.66531e-08	down	AT5G05830.1	RING/FYVE/PHD zinc finger superfamily protein
Potri.001G248400	-1.37518	1.28168e-11	down	AT5G58930.1	Protein of unknown function (DUF740)
Potri.001G249600	2.04074	0.00178583	up	AT3G47070.1
Potri.001G249700	3.53554	2.60857e-13	up	AT5G58860.1	cytochrome P450, family 86, subfamily A, polypeptide 1
Potri.001G250800	-1.09363	0.00383545	down	AT3G47160.1	RING/U-box superfamily protein
Potri.001G251500	1.56356	0.000635297	up	AT5G58730.1	pfkB-like carbohydrate kinase family protein
Potri.001G251900	1.03255	0.00977137	up	AT5G01450.1	RING/U-box superfamily protein
Potri.001G252100	-1.02397	0.00034219	down	AT5G58700.1	phosphatidylinositol-speciwc phospholipase C4
Potri.001G253300	1.03612	2.95942e-07	up	AT2G13360.1	alanine:glyoxylate aminotransferase
Potri.001G254500	-1.38165	5.97529e-06	down	AT1G50490.1	ubiquitin-conjugating enzyme 20
Potri.001G254600	-1.87975	2.13247e-26	down	AT5G12410.1	THUMP domain-containing protein
Potri.001G255800	2.99672	2.21954e-05	up	AT3G21090.1	ABC-2 type transporter family protein
Potri.001G257600	1.16942	0.00582269	up	AT5G12840.2	nuclear factor Y, subunit A1
Potri.001G257700	-1.59611	3.88081e-07	down	AT3G20898.1
Potri.001G258100	2.45162	0.000259839	up	AT5G19855.1	Chaperonin-like RbcX protein
Potri.001G258700	-3.15058	0.000830907	down	AT5G12870.1	myb domain protein 46
Potri.001G259200	-1.64862	8.06655e-06	down	AT1G51260.1	lysophosphatidyl acyltransferase 3
Potri.001G262200	1.06579	5.33355e-06	up	AT5G12470.1	Protein of unknown function (DUF3411)
Potri.001G263400	-3.0269	7.70257e-08	down	AT5G13700.1	polyamine oxidase 1
Potri.001G264000	-1.46815	6.0591e-12	down	AT3G23890.2	topoisomerase II
Potri.001G266500	3.08643	4.24508e-06	up	AT1G07985.1	Expressed protein
Potri.001G267200	-2.84671	9.45609e-38	down	AT3G08490.1
Potri.001G268500	2.73759	2.21617e-44	up
Potri.001G268600	1.06368	6.49511e-06	up	AT4G37980.1	elicitor-activated gene 3-1
Potri.001G271300	-1.82874	7.00201e-23	down	AT5G48030.1	gametophytic factor 2
Potri.001G272000	-1.1554	0.000210274	down	AT2G26760.1	Cyclin B1;4
Potri.001G272700	-1.17763	1.8836e-11	down	AT5G62690.1	tubulin beta chain 2
Potri.001G272800	-1.23691	5.80768e-08	down	AT5G62690.1	tubulin beta chain 2
Potri.001G273700	-1.41291	6.09044e-09	down	AT1G46264.1	heat shock transcription factor B4
Potri.001G278200	1.7397	3.71518e-13	up	AT5G58660.1	2-oxoglutarate (2OG) and Fe(II)-dependent oxygenase superfamily protein
Potri.001G278500	2.1977	7.66627e-30	up	AT2G30020.1	Protein phosphatase 2C family protein
Potri.001G279000	-2.35957	7.55558e-26	down	AT1G07120.1
Potri.001G279500	-1.08481	4.09385e-05	down	AT3G51780.1	BCL-2-associated athanogene 4
Potri.001G280200	-2.43579	1.71462e-31	down	AT5G45840.2	Leucine-rich repeat protein kinase family protein
Potri.001G280700	-1.81284	4.88016e-09	down	AT5G58520.1	Protein kinase superfamily protein
Potri.001G285300	1.1083	5.65395e-06	up	AT2G04305.1	Magnesium transporter CorA-like family protein
Potri.001G287400	2.65773	1.89675e-07	up	AT2G22780.1	peroxisomal NAD-malate dehydrogenase 1
Potri.001G287800	-1.09369	0.00891842	down	AT4G17000.1
Potri.001G288100	5.54026	3.121e-08	up
Potri.001G288900	3.25992	8.09818e-33	up	AT1G10020.1	Protein of unknown function (DUF1005)
Potri.001G289500	-1.43777	1.4596e-16	down	AT4G14960.2	Tubulin/FtsZ family protein
Potri.001G292600	-1.41759	4.42758e-05	down	AT1G49960.1	Xanthine/uracil permease family protein
Potri.001G292900	-2.24962	3.03686e-31	down	AT1G10200.1	GATA type zinc finger transcription factor family protein
Potri.001G293400	1.20939	7.38771e-06	up	AT2G14750.1	APS kinase
Potri.001G295300	-1.1268	2.20726e-05	down	AT1G49970.1	CLP protease proteolytic subunit 1
Potri.001G295500	2.32008	1.28995e-18	up	AT1G27730.1	salt tolerance zinc finger
Potri.001G295600	-1.10984	1.72321e-05	down	AT2G14820.1	Phototropic-responsive NPH3 family protein
Potri.001G295800	-1.17666	0.000362936	down	AT1G49890.1	Family of unknown function (DUF566)
Potri.001G296400	1.16426	0.000298517	up	AT2G14860.1	Peroxisomal membrane 22 kDa (Mpv17/PMP22) family protein
Potri.001G296500	1.16849	4.84619e-10	up	AT3G43740.1	Leucine-rich repeat (LRR) family protein
Potri.001G297000	1.54369	7.48669e-13	up	AT1G49850.1	RING/U-box superfamily protein
Potri.001G297200	2.31368	1.94389e-36	up	AT4G33920.1	Protein phosphatase 2C family protein
Potri.001G299000	1.39152	0.000926366	up	AT4G34260.1	1,2-alpha-L-fucosidases
Potri.001G301000	1.3535	0.00553656	up	AT3G19490.1	sodium:hydrogen antiporter 1
Potri.001G301800	-2.57953	1.47839e-39	down	AT4G34160.1	CYCLIN D3;1
Potri.001G302600	-1.54994	2.72854e-12	down	AT5G67210.1	Protein of unknown function (DUF579)
Potri.001G304800	-1.46447	8.40243e-17	down	AT4G34050.1	S-adenosyl-L-methionine-dependent methyltransferases superfamily protein
Potri.001G308800	2.67419	1.55012e-06	up
Potri.001G309100	1.46285	3.82479e-07	up	AT1G76890.2	Duplicated homeodomain-like superfamily protein
Potri.001G310500	2.03991	1.38776e-19	up	AT5G64300.1	GTP cyclohydrolase II
Potri.001G312800	1.71831	5.74083e-05	up	AT1G33540.1	serine carboxypeptidase-like 18
Potri.001G313000	3.54774	1.02671e-27	up	AT1G22360.1	UDP-glucosyl transferase 85A2
Potri.001G314000	-1.37492	8.24737e-15	down	AT5G48820.1	inhibitor/interactor with cyclin-dependent kinase
Potri.001G318200	3.2172	0.00344655	up	AT5G06043.1
Potri.001G319100	1.3946	8.7366e-09	up	AT4G13830.2	DNAJ-like 20
Potri.001G320800	-3.40433	1.70154e-39	down	AT5G03170.1	FASCICLIN-like arabinogalactan-protein 11
Potri.001G321300	-1.21944	4.08429e-06	down	AT4G14010.1	ralf-like 32
Potri.001G325200	-1.34058	0.000171215	down	AT3G02040.1	senescence-related gene 3
Potri.001G325300	-1.27838	0.00527415	down	AT5G41070.1	dsRNA-binding protein 5
Potri.001G325400	-1.06032	2.62853e-06	down	AT3G26935.1	DHHC-type zinc finger family protein
Potri.001G325800	-4.28695	1.87299e-16	down	AT3G02000.1	Thioredoxin superfamily protein
Potri.001G326300	4.59098	1.18354e-23	up	AT5G41040.1	HXXXD-type acyl-transferase family protein
Potri.001G327800	1.32955	1.59636e-06	up	AT3G01980.1	NAD(P)-binding Rossmann-fold superfamily protein
Potri.001G329900	1.04931	0.00665053	up	AT1G60550.1	enoyl-CoA hydratase/isomerase D
Potri.001G332200	-3.31365	8.46144e-33	down	AT3G27200.1	Cupredoxin superfamily protein
Potri.001G332300	-1.06995	0.00173517	down	AT5G14180.1	Myzus persicae-induced lipase 1
Potri.001G332800	-1.10735	6.14546e-05	down	AT3G01840.1	Protein kinase superfamily protein
Potri.001G333300	-1.08996	0.000167639	down	AT5G14210.1	Leucine-rich repeat protein kinase family protein
Potri.001G334700	1.3823	0.00468383	up	AT4G31940.1	cytochrome P450, family 82, subfamily C, polypeptide 4
Potri.001G335300	5.74111	7.6161e-12	up	AT5G40780.1	lysine histidine transporter 1
Potri.001G336300	-1.68627	2.98504e-12	down	AT3G01710.2	TPX2 (targeting protein for Xklp2) protein family
Potri.001G337200	1.61636	1.00915e-05	up	AT5G22660.2	FBD, F-box, Skp2-like and Leucine Rich Repeat domains containing protein
Potri.001G339500	-1.75398	1.68837e-14	down	AT3G27400.1	Pectin lyase-like superfamily protein
Potri.001G342000	4.8061	5.36359e-27	up	AT3G45780.1	phototropin 1
Potri.001G343400	-1.22568	2.26967e-06	down	AT3G01640.1	glucuronokinase G
Potri.001G343800	-1.14756	1.50375e-06	down	AT3G01600.1	NAC domain containing protein 44
Potri.001G348800	-1.02288	3.75851e-07	down	AT3G27925.1	DegP protease 1
Potri.001G349900	1.28578	0.000100382	up	AT3G28450.1	Leucine-rich repeat protein kinase family protein
Potri.001G351200	1.72781	1.14866e-11	up	AT5G62680.1	Major facilitator superfamily protein
Potri.001G352100	2.14773	0.00119167	up	AT4G18210.1	purine permease 10
Potri.001G352300	-1.1602	2.49868e-10	down	AT2G34410.1	O-acetyltransferase family protein
Potri.001G352400	1.73946	0.00896349	up	AT4G18170.1	WRKY DNA-binding protein 28
Potri.001G352500	1.11568	0.00422222	up	AT4G18160.1	Ca2+ activated outward rectifying K+ channel 6
Potri.001G355100	3.15653	1.30853e-08	up	AT1G17020.1	senescence-related gene 1
Potri.001G356200	-1.02951	4.62103e-05	down	AT3G20300.1	Protein of unknown function (DUF3537)
Potri.001G359000	-1.10808	0.000694993	down	AT5G55250.1	IAA carboxylmethyltransferase 1
Potri.001G366700	-1.14096	0.00367816	down	AT3G13170.1	Spo11/DNA topoisomerase VI, subunit A protein
Potri.001G367500	1.57456	0.0005333	up	AT4G14540.1	nuclear factor Y, subunit B3
Potri.001G367600	-1.82402	3.71833e-11	down
Potri.001G370800	-1.95659	1.24907e-12	down	AT5G55950.1	Nucleotide/sugar transporter family protein
Potri.001G371200	-2.32452	9.88941e-14	down	AT5G55970.1	RING/U-box superfamily protein
Potri.001G375700	-2.27014	2.14452e-15	down	AT3G15050.1	IQ-domain 10
Potri.001G375800	1.72814	0.00136114	up	AT3G15030.1	TCP family transcription factor 4
Potri.001G376700	-2.00503	1.13831e-09	down	AT1G73140.1	Plant protein of unknown function (DUF828)
Potri.001G378400	2.31018	1.26424e-05	up	AT1G78440.1	Arabidopsis thaliana gibberellin 2-oxidase 1
Potri.001G379800	1.23033	0.00551577	up	AT1G53590.1	Calcium-dependent lipid-binding (CaLB domain) family protein
Potri.001G380600	-2.4657	3.3534e-11	down	AT1G78520.1	Carbohydrate-binding X8 domain superfamily protein
Potri.001G381000	3.24339	3.12505e-19	up	AT4G16580.1	Protein phosphatase 2C family protein
Potri.001G382500	2.38351	0.000743923	up	AT3G14740.2	RING/FYVE/PHD zinc finger superfamily protein
Potri.001G383000	1.5852	0.000377367	up	AT3G14770.1	Nodulin MtN3 family protein
Potri.001G386300	2.24878	0.00035332	up	AT1G53440.1	Leucine-rich repeat transmembrane protein kinase
Potri.001G387900	1.19821	0.000466439	up
Potri.001G388900	1.32943	0.00641606	up
Potri.001G389200	1.56933	0.00488156	up	AT1G05680.1	Uridine diphosphate glycosyltransferase 74E2
Potri.001G390600	1.8635	8.32392e-05	up	AT3G14900.1
Potri.001G394400	2.45288	5.35693e-23	up	AT3G14420.1	Aldolase-type TIM barrel family protein
Potri.001G397200	1.87692	1.09909e-20	up	AT3G15210.1	ethylene responsive element binding factor 4
Potri.001G398500	-1.55453	2.16212e-13	down	AT5G53890.1	phytosylfokine-alpha receptor 2
Potri.001G398700	-1.67158	0.000805654	down	AT5G53880.1
Potri.001G398800	1.3643	5.13123e-08	up	AT5G53870.1	early nodulin-like protein 1
Potri.001G399900	-1.03724	0.0070592	down	AT1G53035.1
Potri.001G400100	3.66655	1.19072e-85	up	AT3G15353.1	metallothionein 3
Potri.001G401100	-2.51751	8.1099e-06	down	AT5G60020.1	laccase 17
Potri.001G401300	-2.82131	1.93166e-18	down	AT5G60020.1	laccase 17
Potri.001G402600	1.04203	3.75886e-09	up	AT1G07750.1	RmlC-like cupins superfamily protein
Potri.001G403200	-1.00831	4.18636e-07	down	AT1G52920.1	G protein coupled receptor
Potri.001G404100	2.46627	1.2103e-17	up	AT4G27410.2	NAC (No Apical Meristem) domain transcriptional regulator superfamily protein
Potri.001G404400	2.10484	6.71404e-11	up	AT3G15510.1	NAC domain containing protein 2
Potri.001G405500	1.38015	1.6302e-10	up	AT5G54380.1	protein kinase family protein
Potri.001G406600	-3.24777	0.000245366	down	AT1G61260.1	Protein of unknown function (DUF761)
Potri.001G407000	-1.24664	2.5934e-12	down	AT5G54280.2	myosin 2
Potri.001G407100	1.01987	0.00622525	up	AT5G54270.1	light-harvesting chlorophyll B-binding protein 3
Potri.001G407900	2.82981	0.00906241	up	AT4G27360.1	Dynein light chain type 1 family protein
Potri.001G408500	1.42668	6.64974e-06	up	AT2G20900.2	diacylglycerol kinase 5
Potri.001G409500	4.24734	1.21762e-86	up	AT1G50600.1	scarecrow-like 5
Potri.001G410600	-2.87055	1.06825e-05	down	AT3G20640.1	basic helix-loop-helix (bHLH) DNA-binding superfamily protein
Potri.001G410700	-1.01688	3.08813e-08	down	AT4G27270.1	Quinone reductase family protein
Potri.001G411000	1.99991	1.39898e-07	up	AT4G27290.1	S-locus lectin protein kinase family protein
Potri.001G411100	1.72097	0.00049004	up	AT4G27290.1	S-locus lectin protein kinase family protein
Potri.001G411800	3.83835	3.75614e-86	up	AT4G27280.1	Calcium-binding EF-hand family protein
Potri.001G412000	2.6189	7.48949e-09	up	AT4G27290.1	S-locus lectin protein kinase family protein
Potri.001G412200	2.33491	2.05026e-15	up	AT4G27290.1	S-locus lectin protein kinase family protein
Potri.001G412500	7.64455	2.42996e-14	up
Potri.001G413700	1.07506	0.00124848	up	AT4G27290.1	S-locus lectin protein kinase family protein
Potri.001G414700	1.44504	0.000100651	up	AT5G54470.1	B-box type zinc finger family protein
Potri.001G416500	-1.59395	3.38476e-05	down	AT1G11530.1	C-terminal cysteine residue is changed to a serine 1
Potri.001G416800	-2.28012	3.64755e-31	down	AT5G54690.1	galacturonosyltransferase 12
Potri.001G418000	2.21416	2.1975e-08	up	AT3G20600.1	Late embryogenesis abundant (LEA) hydroxyproline-rich glycoprotein family
Potri.001G419000	3.96184	2.0846e-08	up	AT3G20580.1	COBRA-like protein 10 precursor
Potri.001G422000	-2.58689	3.32099e-07	down
Potri.001G422600	-1.79148	0.000332311	down	AT3G56360.1
Potri.001G437400	-1.33926	1.61835e-06	down	AT1G78380.1	glutathione S-transferase TAU 19
Potri.001G438400	3.09033	1.13525e-12	up	AT1G16670.1	Protein kinase superfamily protein
Potri.001G440300	-1.612	2.74575e-18	down	AT4G20430.1	Subtilase family protein
Potri.001G442500	-1.38757	4.78731e-07	down	AT5G44560.1	SNF7 family protein
Potri.001G442900	-1.36284	1.92174e-11	down	AT4G19490.1	VPS54
Potri.001G443000	-3.10635	1.60621e-16	down
Potri.001G443100	-2.21549	3.12764e-09	down
Potri.001G448300	-2.47344	2.26654e-15	down	AT4G10630.1	Glutaredoxin family protein
Potri.001G448400	-1.66758	8.27604e-08	down	AT2G46770.1	NAC (No Apical Meristem) domain transcriptional regulator superfamily protein
Potri.001G448500	2.1262	4.83994e-06	up	AT1G64700.1
Potri.001G450200	-1.74009	1.04839e-14	down	AT1G32930.1	Galactosyltransferase family protein
Potri.001G450400	-1.84813	1.41344e-05	down	AT4G10520.1	Subtilase family protein
Potri.001G450600	-1.08503	5.1917e-06	down	AT1G32960.1	Subtilase family protein
Potri.001G451600	5.44392	6.84435e-51	up	AT4G10500.1	2-oxoglutarate (2OG) and Fe(II)-dependent oxygenase superfamily protein
Potri.001G453800	-1.10754	0.000337513	down	AT5G47610.1	RING/U-box superfamily protein
Potri.001G454600	1.50796	1.31354e-11	up	AT1G33250.1	Protein of unknown function (DUF604)
Potri.001G458000	-2.70812	0.000459253	down	AT3G12955.1	SAUR-like auxin-responsive protein family
Potri.001G463000	-3.18026	2.25239e-08	down	AT1G70500.1	Pectin lyase-like superfamily protein
Potri.001G463200	1.58057	3.64091e-07	up	AT3G26710.1	cofactor assembly of complex C
Potri.001G465800	-1.16388	0.00793847	down	AT4G20940.1	Leucine-rich receptor-like protein kinase family protein
Potri.001G469700	-1.3569	7.65959e-05	down	AT5G56090.1	cytochrome c oxidase 15
Potri.001G470100	1.87662	6.38283e-05	up	AT1G30700.1	FAD-binding Berberine family protein
Potri.001G470700	1.3019	2.34106e-06	up	AT1G60950.1	2Fe-2S ferredoxin-like superfamily protein
Potri.001G470800	-2.62791	3.33521e-36	down	AT5G56120.1
Potri.001G471200	1.07547	3.90094e-08	up	AT5G53300.1	ubiquitin-conjugating enzyme 10
Potri.001G472800	-1.37688	2.89746e-15	down	AT5G56270.1	WRKY DNA-binding protein 2
Potri.002G001400	4.97336	2.06523e-50	up	AT5G42380.1	calmodulin like 37
Potri.002G002400	1.0987	4.25804e-09	up	AT1G20980.1	squamosa promoter binding protein-like 14
Potri.002G004900	4.3161	1.21688e-34	up	AT3G57710.1	Protein kinase superfamily protein
Potri.002G005300	-1.72576	0.00310624	down	AT1G06330.1	Heavy metal transport/detoxification superfamily protein
Potri.002G005500	4.29692	1.64413e-06	up	AT1G76430.1	phosphate transporter 1;9
Potri.002G005700	-4.76892	1.39258e-34	down	AT1G20850.1	xylem cysteine peptidase 2
Potri.002G006400	2.01804	7.64522e-13	up	AT1G76410.1	RING/U-box superfamily protein
Potri.002G007300	-1.102	5.5376e-10	down	AT5G24318.1	O-Glycosyl hydrolases family 17 protein
Potri.002G009300	-1.23506	5.50161e-06	down	AT1G20650.1	Protein kinase superfamily protein
Potri.002G010000	-1.40517	1.57024e-05	down	AT1G76310.1	CYCLIN B2;4
Potri.002G010400	-1.84168	2.90877e-08	down	AT5G42330.1
Potri.002G011400	1.32949	0.000546172	up	AT1G76250.1
Potri.002G012900	1.33296	0.00115374	up	AT1G47670.1	Transmembrane amino acid transporter family protein
Potri.002G013200	-2.70101	7.46181e-06	down	AT1G20450.1	Dehydrin family protein
Potri.002G014300	1.81806	4.30058e-22	up	AT1G76130.1	alpha-amylase-like 2
Potri.002G015100	1.73378	2.42241e-23	up	AT3G03190.1	glutathione S-transferase F11
Potri.002G016200	1.32758	4.67159e-09	up	AT2G16980.2	Major facilitator superfamily protein
Potri.002G017500	1.84189	6.8497e-08	up	AT1G20225.1	Thioredoxin superfamily protein
Potri.002G018600	-1.30395	0.000295659	down	AT1G20160.1	Subtilisin-like serine endopeptidase family protein
Potri.002G020400	-1.8135	2.91652e-08	down	AT4G38660.1	Pathogenesis-related thaumatin superfamily protein
Potri.002G020500	-1.65204	8.51401e-05	down	AT1G75800.1	Pathogenesis-related thaumatin superfamily protein
Potri.002G020700	3.06405	2.33593e-07	up	AT2G17880.1	Chaperone DnaJ-domain superfamily protein
Potri.002G021800	-1.10792	1.03245e-08	down	AT1G20010.1	tubulin beta-5 chain
Potri.002G022600	-2.33438	3.31244e-05	down	AT1G75750.1	GAST1 protein homolog 1
Potri.002G023900	-1.07096	1.14365e-06	down	AT1G19940.1	glycosyl hydrolase 9B5
Potri.002G024300	-1.81401	1.4951e-06	down	AT1G75580.1	SAUR-like auxin-responsive protein family
Potri.002G024500	-3.93867	2.95027e-25	down	AT1G75590.1	SAUR-like auxin-responsive protein family
Potri.002G028200	1.37586	3.1966e-05	up	AT1G75540.1	salt tolerance homolog2
Potri.002G029100	-1.15302	9.07609e-11	down	AT1G75500.1	Walls Are Thin 1
Potri.002G029200	2.28506	1.40009e-08	up	AT3G54140.1	peptide transporter 1
Potri.002G030900	1.07126	4.79962e-07	up	AT1G75430.1	BEL1-like homeodomain 11
Potri.002G031000	-1.97968	6.27545e-09	down	AT2G16400.1	BEL1-like homeodomain 7
Potri.002G032300	1.18702	2.54146e-05	up	AT5G45190.1	Cyclin family protein
Potri.002G033000	-1.23119	0.000691615	down	AT1G19630.1	cytochrome P450, family 722, subfamily A, polypeptide 1
Potri.002G033600	1.29051	4.97505e-06	up	AT5G42800.1	dihydroflavonol 4-reductase
Potri.002G034400	-2.19511	2.33964e-35	down	AT1G75280.1	NmrA-like negative transcriptional regulator family protein
Potri.002G035000	-1.86776	2.54833e-07	down	AT1G75250.2	RAD-like 6
Potri.002G037400	1.59571	5.17706e-10	up	AT3G54690.1	Sugar isomerase (SIS) family protein
Potri.002G040600	-1.12658	2.35037e-10	down	AT2G31280.1	conserved peptide upstream open reading frame 7
Potri.002G040800	-1.3291	0.00032224	down
Potri.002G043300	-1.63578	2.51301e-05	down	AT5G44210.1	erf domain protein 9
Potri.002G046400	-1.68977	8.91022e-19	down	AT3G54560.1	histone H2A 11
Potri.002G047500	2.81319	1.21449e-15	up	AT3G63380.1	ATPase E1-E2 type family protein / haloacid dehalogenase-like hydrolase family protein
Potri.002G048000	-1.07343	9.98223e-06	down	AT4G02670.1	indeterminate(ID)-domain 12
Potri.002G048200	-1.69613	1.12985e-13	down	AT3G22830.1	heat shock transcription factor A6B
Potri.002G049200	1.33972	0.00251189	up	AT3G22810.1	Plant protein of unknown function (DUF828) with plant pleckstrin homology-like region
Potri.002G049500	-1.04587	0.000219245	down	AT3G51895.1	sulfate transporter 3;1
Potri.002G050400	2.12424	4.37069e-05	up	AT3G22600.1	Bifunctional inhibitor/lipid-transfer protein/seed storage 2S albumin superfamily protein
Potri.002G050500	1.96281	0.000528217	up	AT3G22600.1	Bifunctional inhibitor/lipid-transfer protein/seed storage 2S albumin superfamily protein
Potri.002G052600	-1.66612	1.57915e-07	down	AT3G63200.1	PATATIN-like protein 9
Potri.002G053700	-1.28278	0.00285851	down	AT4G02830.2
Potri.002G055100	1.42822	0.000635332	up	AT3G59030.1	MATE efflux family protein
Potri.002G055500	1.42929	0.00280753	up	AT1G06690.1	NAD(P)-linked oxidoreductase superfamily protein
Potri.002G056500	1.24885	6.77855e-05	up	AT5G45110.1	NPR1-like protein 3
Potri.002G056600	1.59899	1.22384e-11	up	AT4G19645.1	TRAM, LAG1 and CLN8 (TLC) lipid-sensing domain containing protein
Potri.002G057000	-1.62706	3.4416e-07	down	AT1G06660.1
Potri.002G057400	1.47865	8.61699e-13	up	AT1G06570.1	phytoene desaturation 1
Potri.002G057900	-2.12747	7.13901e-23	down	AT4G18260.1	Cytochrome b561/ferric reductase transmembrane protein family
Potri.002G059100	2.18141	0.00081739	up	AT4G18170.1	WRKY DNA-binding protein 28
Potri.002G060100	-1.84336	1.19712e-17	down	AT3G58850.1	phy rapidly regulated 2
Potri.002G060400	3.95206	2.39079e-08	up	AT4G14130.1	xyloglucan endotransglucosylase/hydrolase 15
Potri.002G060500	1.68623	1.05373e-17	up	AT4G14130.1	xyloglucan endotransglucosylase/hydrolase 15
Potri.002G061300	1.46834	1.71863e-14	up	AT1G34190.1	NAC domain containing protein 17
Potri.002G062600	1.91977	7.8678e-12	up	AT1G22750.2
Potri.002G063700	1.22803	0.00688423	up	AT4G09760.1	Protein kinase superfamily protein
Potri.002G065100	-1.06444	3.16271e-05	down	AT1G53050.1	Protein kinase superfamily protein
Potri.002G065300	1.92274	6.7991e-06	up	AT1G71695.1	Peroxidase superfamily protein
Potri.002G065400	2.22062	3.71518e-13	up	AT5G42440.1	Protein kinase superfamily protein
Potri.002G065600	3.1577	1.88851e-07	up	AT2G33710.1	Integrase-type DNA-binding superfamily protein
Potri.002G067600	-1.70845	7.03255e-22	down	AT1G21090.1	Cupredoxin superfamily protein
Potri.002G067800	1.27376	6.16622e-13	up	AT1G18740.1	Protein of unknown function (DUF793)
Potri.002G068400	2.97001	5.70132e-05	up	AT1G76890.2	Duplicated homeodomain-like superfamily protein
Potri.002G068600	1.11915	1.59577e-08	up	AT1G76880.1	Duplicated homeodomain-like superfamily protein
Potri.002G069000	-2.29049	3.79659e-06	down	AT1G43670.1	Inositol monophosphatase family protein
Potri.002G070900	-1.66793	9.94093e-07	down	AT5G48940.1	Leucine-rich repeat transmembrane protein kinase family protein
Potri.002G074000	-1.64664	1.33987e-07	down	AT2G02850.1	plantacyanin
Potri.002G074800	1.25167	0.00314558	up	AT1G76990.1	ACT domain repeat 3
Potri.002G076200	-1.26319	0.00572275	down	AT1G21510.1
Potri.002G077500	1.0633	5.37266e-05	up	AT1G77270.1
Potri.002G077600	2.06931	0.00261819	up	AT4G37925.1	subunit NDH-M of NAD(P)H:plastoquinone dehydrogenase complex
Potri.002G078600	-3.10614	0.00233701	down	AT1G77330.1	2-oxoglutarate (2OG) and Fe(II)-dependent oxygenase superfamily protein
Potri.002G079400	3.58499	1.9249e-83	up	AT1G77380.1	amino acid permease 3
Potri.002G079500	5.82904	1.82919e-19	up	AT1G77380.1	amino acid permease 3
Potri.002G079700	4.44196	5.66087e-21	up	AT1G77380.1	amino acid permease 3
Potri.002G080200	-1.97024	0.000271595	down	AT1G77400.1
Potri.002G081800	1.57932	0.000865393	up	AT1G44170.1	aldehyde dehydrogenase 3H1
Potri.002G083100	-1.74315	2.72633e-17	down	AT1G44414.1
Potri.002G083500	4.16894	1.20107e-32	up	AT1G44575.1	Chlorophyll A-B binding family protein
Potri.002G084600	-2.6818	0.000154799	down	AT1G44760.1	Adenine nucleotide alpha hydrolases-like superfamily protein
Potri.002G085600	3.54207	6.71404e-11	up	AT1G21910.1	Integrase-type DNA-binding superfamily protein
Potri.002G087000	-1.07137	1.17077e-05	down	AT1G77690.1	like AUX1 3
Potri.002G087300	-1.12485	9.31415e-07	down	AT1G38131.1	O-fucosyltransferase family protein
Potri.002G087600	-1.38532	0.00369105	down	AT1G77720.1	putative protein kinase 1
Potri.002G088600	4.1712	1.1595e-20	up	AT1G77760.1	nitrate reductase 1
Potri.002G092400	1.88013	1.08184e-22	up	AT1G77990.1	STAS domain / Sulfate transporter family
Potri.002G093500	1.27304	1.11409e-11	up	AT4G30100.1	P-loop containing nucleoside triphosphate hydrolases superfamily protein
Potri.002G094200	1.21564	5.49631e-12	up	AT1G78080.1	related to AP2 4
Potri.002G094500	2.08099	3.81853e-05	up	AT5G65140.1	Haloacid dehalogenase-like hydrolase (HAD) superfamily protein
Potri.002G095900	1.96982	2.01487e-10	up	AT1G34580.1	Major facilitator superfamily protein
Potri.002G097400	3.20863	4.92109e-07	up	AT1G78210.1	alpha/beta-Hydrolases superfamily protein
Potri.002G097800	2.64821	5.92659e-05	up	AT1G78230.1	Outer arm dynein light chain 1 protein
Potri.002G098300	3.22291	2.9414e-27	up	AT1G22360.1	UDP-glucosyl transferase 85A2
Potri.002G098600	1.47725	1.66427e-17	up	AT4G08950.1	Phosphate-responsive 1 family protein
Potri.002G099400	1.04015	2.02658e-08	up	AT1G78280.1	transferases, transferring glycosyl groups
Potri.002G099700	2.2036	4.42542e-10	up	AT1G78290.2	Protein kinase superfamily protein
Potri.002G100500	6.09682	5.91553e-14	up	AT1G35210.1
Potri.002G101200	-2.18879	5.17717e-31	down	AT1G72230.1	Cupredoxin superfamily protein
Potri.002G101300	-1.9946	8.4125e-21	down	AT1G72230.1	Cupredoxin superfamily protein
Potri.002G101400	-1.53492	0.00368756	down	AT4G09060.1
Potri.002G101800	-1.96709	7.07001e-11	down	AT1G72220.1	RING/U-box superfamily protein
Potri.002G102500	1.68952	2.65558e-15	up	AT4G24380.1
Potri.002G102700	1.11181	1.04396e-07	up	AT5G49980.1	auxin F-box protein 5
Potri.002G104300	-1.25663	7.43815e-08	down	AT4G24580.1	Rho GTPase activation protein (RhoGAP) with PH domain
Potri.002G105000	2.12502	0.00760674	up	AT5G49700.1	Predicted AT-hook DNA-binding family protein
Potri.002G106000	-1.1708	1.04161e-07	down	AT5G60930.1	P-loop containing nucleoside triphosphate hydrolases superfamily protein
Potri.002G106100	-1.07533	0.00106045	down	AT5G60930.1	P-loop containing nucleoside triphosphate hydrolases superfamily protein
Potri.002G106800	1.63271	4.08511e-18	up	AT1G09970.1	Leucine-rich receptor-like protein kinase family protein
Potri.002G107200	1.53849	1.9754e-08	up	AT1G58340.1	MATE efflux family protein
Potri.002G108100	2.03024	2.35164e-06	up	AT5G65660.1	hydroxyproline-rich glycoprotein family protein
Potri.002G108600	2.03601	2.60922e-09	up	AT5G64460.1	Phosphoglycerate mutase family protein
Potri.002G109200	-1.06154	1.4001e-08	down	AT5G26780.1	serine hydroxymethyltransferase 2
Potri.002G110100	-2.08295	1.22996e-25	down	AT1G09890.1	Rhamnogalacturonate lyase family protein
Potri.002G110200	1.83774	2.86105e-15	up	AT1G09890.1	Rhamnogalacturonate lyase family protein
Potri.002G111600	-1.95564	8.8776e-05	down	AT4G30200.2	vernalization5/VIN3-like
Potri.002G111900	-1.86942	2.62105e-25	down	AT1G50010.1	tubulin alpha-2 chain
Potri.002G114200	2.09421	6.89458e-32	up	AT4G07960.1	Cellulose-synthase-like C12
Potri.002G114700	1.0733	1.42767e-09	up	AT1G10120.1	basic helix-loop-helix (bHLH) DNA-binding superfamily protein
Potri.002G118000	-1.48693	2.24354e-16	down	AT1G10200.1	GATA type zinc finger transcription factor family protein
Potri.002G118400	2.09376	1.63202e-11	up	AT5G63905.1
Potri.002G118700	-1.59971	0.0078941	down	AT5G43190.1	Galactose oxidase/kelch repeat superfamily protein
Potri.002G118800	1.80222	1.68582e-11	up	AT3G01400.1	ARM repeat superfamily protein
Potri.002G119300	2.29056	5.53024e-06	up	AT1G27730.1	salt tolerance zinc finger
Potri.002G119400	2.17564	1.916e-25	up	AT3G49940.1	LOB domain-containing protein 38
Potri.002G119700	1.29268	0.00467362	up	AT5G43150.1
Potri.002G119800	1.12452	1.84194e-07	up	AT2G26680.1
Potri.002G120700	1.08948	6.85687e-10	up	AT4G24220.1	NAD(P)-binding Rossmann-fold superfamily protein
Potri.002G121500	-3.13213	6.23856e-10	down	AT1G47230.1	CYCLIN A3;4
Potri.002G121900	1.90025	0.00193623	up	AT5G10600.1	cytochrome P450, family 81, subfamily K, polypeptide 2
Potri.002G122600	1.42152	4.74778e-15	up	AT4G37260.1	myb domain protein 73
Potri.002G122800	1.25168	5.86152e-05	up
Potri.002G123800	1.5257	0.00831394	up	AT4G06534.1
Potri.002G124400	-2.0798	1.91547e-05	down	AT4G36930.1	basic helix-loop-helix (bHLH) DNA-binding superfamily protein
Potri.002G124500	-3.65753	6.72581e-06	down	AT5G67090.1	Subtilisin-like serine endopeptidase family protein
Potri.002G124600	1.32957	7.88401e-14	up	AT1G45688.1
Potri.002G125900	2.48662	0.00121048	up	AT5G42900.1	cold regulated gene 27
Potri.002G126300	1.70371	5.30604e-08	up	AT4G25000.1	alpha-amylase-like
Potri.002G126800	-1.12646	5.14447e-09	down	AT4G33350.1	Tic22-like family protein
Potri.002G127800	-1.79851	3.70496e-08	down	AT1G47410.1
Potri.002G128100	2.331	4.85701e-07	up	AT1G47490.1	RNA-binding protein 47C
Potri.002G128800	2.0307	0.000664802	up	AT5G42680.1	Protein of unknown function, DUF617
Potri.002G129300	1.37351	9.6698e-14	up	AT4G33300.1	ADR1-like 1
Potri.002G129400	3.29758	6.91344e-08	up	AT2G26510.1	Xanthine/uracil permease family protein
Potri.002G130200	-2.73584	0.00121531	down	AT5G42630.1	Homeodomain-like superfamily protein
Potri.002G130600	-1.29335	5.52351e-07	down	AT2G23450.1	Protein kinase superfamily protein
Potri.002G130700	3.42324	4.82595e-19	up	AT5G42650.1	allene oxide synthase
Potri.002G131800	3.02984	3.50837e-05	up
Potri.002G132100	1.58317	0.00224568	up
Potri.002G133500	-1.33412	1.14923e-09	down	AT1G75060.1
Potri.002G134300	5.44766	4.47956e-12	up	AT1G75100.1	J-domain protein required for chloroplast accumulation response 1
Potri.002G134600	1.23853	1.56638e-12	up	AT5G26667.2	P-loop containing nucleoside triphosphate hydrolases superfamily protein
Potri.002G142200	2.47259	3.73532e-05	up	AT1G02065.1	squamosa promoter binding protein-like 8
Potri.002G142800	3.70535	1.03623e-15	up	AT2G45050.1	GATA transcription factor 2
Potri.002G143300	2.34063	2.89884e-06	up	AT4G00050.1	basic helix-loop-helix (bHLH) DNA-binding superfamily protein
Potri.002G143600	-2.89489	0.00020849	down	AT1G02040.1	C2H2-type zinc finger family protein
Potri.002G145000	-1.0977	1.12472e-05	down	AT3G60680.1	Plant protein of unknown function (DUF641)
Potri.002G145400	1.67512	8.42186e-08	up	AT3G60720.1	plasmodesmata-located protein 8
Potri.002G145700	2.09076	0.000267882	up	AT3G60730.1	Plant invertase/pectin methylesterase inhibitor superfamily
Potri.002G147000	-2.0243	9.65121e-15	down	AT2G45340.1	Leucine-rich repeat protein kinase family protein
Potri.002G148000	1.16709	0.00164734	up	AT2G45400.1	NAD(P)-binding Rossmann-fold superfamily protein
Potri.002G148400	1.45534	0.00782633	up	AT3G60810.1
Potri.002G150400	5.58724	3.82186e-08	up	AT2G45550.1	cytochrome P450, family 76, subfamily C, polypeptide 4
Potri.002G151300	3.40283	0.00132867	up	AT4G25420.1	2-oxoglutarate (2OG) and Fe(II)-dependent oxygenase superfamily protein
Potri.002G151900	-3.12806	5.52239e-11	down	AT4G00230.1	xylem serine peptidase 1
Potri.002G154000	1.04153	0.0035446	up	AT1G33060.2	NAC 014
Potri.002G154400	-3.00824	2.10822e-23	down	AT4G00750.1	S-adenosyl-L-methionine-dependent methyltransferases superfamily protein
Potri.002G155200	1.28583	4.89087e-05	up	AT3G61180.1	RING/U-box superfamily protein
Potri.002G156200	1.0174	4.36977e-05	up	AT3G09970.1	Calcineurin-like metallo-phosphoesterase superfamily protein
Potri.002G156300	1.49134	4.87079e-07	up	AT3G61220.1	NAD(P)-binding Rossmann-fold superfamily protein
Potri.002G156500	1.2679	2.08462e-06	up	AT3G09970.1	Calcineurin-like metallo-phosphoesterase superfamily protein
Potri.002G158000	2.39952	4.12248e-08	up	AT4G11610.1	C2 calcium/lipid-binding plant phosphoribosyltransferase family protein
Potri.002G158300	1.36362	0.00153383	up	AT2G45860.1
Potri.002G160300	1.57447	5.10882e-13	up	AT2G45910.1	U-box domain-containing protein kinase family protein
Potri.002G161900	2.09801	1.89517e-16	up	AT3G61460.1	brassinosteroid-responsive RING-H2
Potri.002G162100	2.09469	0.0041531	up	AT4G00290.1	Mechanosensitive ion channel protein
Potri.002G162500	1.34729	6.07236e-06	up	AT4G01370.1	MAP kinase 4
Potri.002G163400	1.55036	2.58718e-12	up	AT1G01490.1	Heavy metal transport/detoxification superfamily protein
Potri.002G165000	4.41299	3.13197e-73	up	AT2G46140.1	Late embryogenesis abundant protein
Potri.002G166400	-2.18076	7.85109e-21	down	AT4G01200.1	Calcium-dependent lipid-binding (CaLB domain) family protein
Potri.002G168200	2.37559	1.19183e-19	up	AT2G46370.4	Auxin-responsive GH3 family protein
Potri.002G168400	-1.62273	0.000331753	down	AT1G01430.1	TRICHOME BIREFRINGENCE-LIKE 25
Potri.002G168700	5.38686	2.01928e-62	up	AT4G23810.1	WRKY family transcription factor
Potri.002G168900	-2.37465	7.76907e-05	down	AT5G53200.1	Homeodomain-like superfamily protein
Potri.002G170900	3.17362	1.74113e-43	up	AT1G01320.1	Tetratricopeptide repeat (TPR)-like superfamily protein
Potri.002G173000	-1.21321	0.000145717	down
Potri.002G174100	2.06305	3.80456e-09	up	AT5G53500.1	Transducin/WD40 repeat-like superfamily protein
Potri.002G175200	1.38382	4.57868e-05	up	AT2G46660.1	cytochrome P450, family 78, subfamily A, polypeptide 6
Potri.002G175600	1.16247	6.91456e-06	up	AT2G46620.1	P-loop containing nucleoside triphosphate hydrolases superfamily protein
Potri.002G175700	1.07697	1.33529e-05	up	AT1G01200.1	RAB GTPase homolog A3
Potri.002G176300	1.81888	6.18929e-19	up	AT2G46680.1	homeobox 7
Potri.002G176800	-2.19636	4.6212e-19	down	AT2G46710.1	Rho GTPase activating protein with PAK-box/P21-Rho-binding domain
Potri.002G176900	3.83284	6.89509e-23	up	AT1G32640.1	Basic helix-loop-helix (bHLH) DNA-binding family protein
Potri.002G178000	4.54467	3.84478e-05	up	AT1G01120.1	3-ketoacyl-CoA synthase 1
Potri.002G178300	-2.26788	3.35961e-08	down	AT2G46760.1	D-arabinono-1,4-lactone oxidase family protein
Potri.002G178400	-2.08066	0.000390841	down	AT2G46760.1	D-arabinono-1,4-lactone oxidase family protein
Potri.002G178900	-1.19748	2.76009e-05	down	AT3G61920.1
Potri.002G179000	1.97291	0.00253554	up	AT3G61930.1
Potri.002G179100	-1.61737	7.79816e-13	down	AT2G46780.1	RNA-binding (RRM/RBD/RNP motifs) family protein
Potri.002G180400	2.02786	0.00514302	up	AT2G46820.1	photosystem I P subunit
Potri.002G181000	1.48114	0.00320468	up	AT3G61960.1	Protein kinase superfamily protein
Potri.002G181900	2.77722	1.78206e-07	up	AT4G35580.2	NAC transcription factor-like 9
Potri.002G182100	2.23883	7.22419e-14	up
Potri.002G182500	2.0679	6.04956e-27	up	AT1G02270.1	Calcium-binding endonuclease/exonuclease/phosphatase family
Potri.002G184100	2.40432	0.00116251	up	AT1G28200.1	FH interacting protein 1
Potri.002G184900	-1.85063	7.13906e-22	down	AT3G62020.1	germin-like protein 10
Potri.002G185900	-1.21646	0.000145538	down	AT4G01680.1	myb domain protein 55
Potri.002G186400	-1.64413	2.06641e-08	down	AT3G62100.1	indole-3-acetic acid inducible 30
Potri.002G186800	-1.28989	0.00360043	down	AT4G01730.1	DHHC-type zinc finger family protein
Potri.002G188600	1.32623	3.69243e-07	up	AT3G62220.1	Protein kinase superfamily protein
Potri.002G192200	1.24439	0.000225238	up	AT4G01940.1	NFU domain protein 1
Potri.002G193000	1.77864	4.35975e-05	up	AT2G47260.1	WRKY DNA-binding protein 23
Potri.002G195400	-3.37168	8.60684e-11	down	AT2G47360.1
Potri.002G196100	2.20528	1.90602e-10	up	AT3G62410.1	CP12 domain-containing protein 2
Potri.002G196200	1.67095	9.94573e-06	up	AT3G62420.1	basic region/leucine zipper motif 53
Potri.002G197200	-1.40567	8.31862e-12	down	AT1G02640.1	beta-xylosidase 2
Potri.002G197300	-1.89492	0.000280129	down	AT4G02100.1	Heat shock protein DnaJ with tetratricopeptide repeat
Potri.002G197400	-1.61756	1.61559e-05	down	AT4G02110.1	transcription coactivators
Potri.002G197900	1.2771	5.42534e-05	up	AT1G02660.1	alpha/beta-Hydrolases superfamily protein
Potri.002G198000	-1.15244	3.31459e-10	down	AT3G62600.1	DNAJ heat shock family protein
Potri.002G198800	3.80019	1.13278e-13	up	AT5G38700.1
Potri.002G199200	5.10507	1.09711e-09	up	AT1G67030.1	zinc finger protein 6
Potri.002G199600	-1.54796	4.75814e-09	down	AT3G06720.1	importin alpha isoform 1
Potri.002G199900	1.27669	0.0071277	up	AT2G30620.1	winged-helix DNA-binding transcription factor family protein
Potri.002G200300	-1.61656	0.00050179	down	AT1G02730.1	cellulose synthase-like D5
Potri.002G202500	1.1823	0.0017003	up	AT4G02320.1	Plant invertase/pectin methylesterase inhibitor superfamily
Potri.002G203500	1.78533	6.75045e-12	up	AT4G02380.1	senescence-associated gene 21
Potri.002G205500	-2.18315	1.5116e-26	down	AT2G47800.1	multidrug resistance-associated protein 4
Potri.002G206300	-1.22839	3.39307e-06	down	AT1G02910.1	tetratricopeptide repeat (TPR)-containing protein
Potri.002G206400	1.27494	2.87379e-11	up	AT2G47750.1	putative indole-3-acetic acid-amido synthetase GH3.9
Potri.002G206700	1.79105	9.86888e-11	up
Potri.002G207500	-1.32668	0.000875354	down	AT2G47930.1	arabinogalactan protein 26
Potri.002G207800	2.53971	3.91339e-11	up	AT3G62980.1	F-box/RNI-like superfamily protein
Potri.002G209700	-1.1433	2.25708e-07	down	AT1G03010.1	Phototropic-responsive NPH3 family protein
Potri.002G211100	5.33982	0.000160049	up	ATCG00480.1	ATP synthase subunit beta
Potri.002G211300	4.40768	8.68782e-16	up	ATMG01320.1	NADH dehydrogenase 2B
Potri.002G211500	6.42404	0.000118922	up
Potri.002G211600	3.047	0.00250572	up
Potri.002G211700	3.83676	0.00193916	up
Potri.002G211800	3.49116	0.000720294	up
Potri.002G212400	-1.02449	1.54135e-06	down	AT4G02980.1	endoplasmic reticulum auxin binding protein 1
Potri.002G213200	1.97607	1.83549e-05	up	AT2G03430.1	Ankyrin repeat family protein
Potri.002G214100	-2.3232	4.71158e-12	down	AT1G53310.1	phosphoenolpyruvate carboxylase 1
Potri.002G214800	2.34427	1.57185e-27	up	AT1G12900.1	glyceraldehyde 3-phosphate dehydrogenase A subunit 2
Potri.002G220400	2.90295	5.99193e-30	up	AT1G12900.1	glyceraldehyde 3-phosphate dehydrogenase A subunit 2
Potri.002G222300	-1.49243	0.00132376	down	AT3G07800.1	Thymidine kinase
Potri.002G222600	-1.76103	8.84541e-06	down	AT2G04850.1	Auxin-responsive family protein
Potri.002G222700	2.51527	1.88472e-11	up	AT5G47530.1	Auxin-responsive family protein
Potri.002G223000	1.62154	6.30545e-09	up	AT3G07870.1	F-box and associated interaction domains-containing protein
Potri.002G223100	-1.85631	2.72001e-06	down
Potri.002G223300	-1.63893	4.16473e-05	down	AT2G04780.1	FASCICLIN-like arabinoogalactan 7
Potri.002G224100	1.08871	5.69937e-06	up	AT1G05010.1	ethylene-forming enzyme
Potri.002G224400	-1.61956	0.00896464	down	AT2G05810.1	ARM repeat superfamily protein
Potri.002G224600	-2.05419	8.80871e-30	down	AT2G05790.1	O-Glycosyl hydrolases family 17 protein
Potri.002G225200	-1.49167	0.00650438	down	AT2G32990.1	glycosyl hydrolase 9B8
Potri.002G225500	1.49957	1.28971e-15	up	AT3G21670.1	Major facilitator superfamily protein
Potri.002G226500	1.04336	0.00442374	up	AT3G30390.1	Transmembrane amino acid transporter family protein
Potri.002G227500	1.0272	0.00208928	up	AT5G18290.1	Aquaporin-like superfamily protein
Potri.002G228600	1.09945	0.00300855	up	AT2G32480.1	ARABIDOPSIS SERIN PROTEASE
Potri.002G230600	1.54558	3.27179e-12	up	AT3G59310.1	Eukaryotic protein of unknown function (DUF914)
Potri.002G231900	1.53305	2.71134e-07	up	AT2G43120.1	RmlC-like cupins superfamily protein
Potri.002G233100	-2.20743	5.26379e-07	down	AT5G16740.1	Transmembrane amino acid transporter family protein
Potri.002G233200	-2.4557	2.38046e-19	down	AT5G16740.1	Transmembrane amino acid transporter family protein
Potri.002G234000	-2.38341	0.00179973	down	AT1G60690.1	NAD(P)-linked oxidoreductase superfamily protein
Potri.002G235200	-1.1386	0.000424702	down	AT4G14210.1	phytoene desaturase 3
Potri.002G235500	-1.02898	1.52933e-05	down	AT3G23670.1	phragmoplast-associated kinesin-related protein, putative
Potri.002G235800	2.46792	0.00016885	up	AT2G31980.1	PHYTOCYSTATIN 2
Potri.002G237000	1.67458	7.54592e-10	up	AT2G31410.1
Potri.002G238800	-2.24275	4.34518e-09	down	AT4G13710.1	Pectin lyase-like superfamily protein
Potri.002G239500	-1.76744	2.10396e-12	down	AT3G07510.1
Potri.002G240200	-1.65993	1.58452e-20	down	AT3G25500.1	formin homology 1
Potri.002G242100	-1.20464	2.66154e-05	down	AT5G48820.1	inhibitor/interactor with cyclin-dependent kinase
Potri.002G242500	-1.41448	1.83747e-10	down	AT2G32720.1	cytochrome B5 isoform B
Potri.002G242700	-1.85552	5.78394e-25	down	AT5G48740.1	Leucine-rich repeat protein kinase family protein
Potri.002G244400	-1.23151	1.17569e-06	down	AT3G07150.1
Potri.002G245500	1.28463	1.09675e-09	up	AT5G48655.1	RING/U-box superfamily protein
Potri.002G246400	-1.25749	2.4809e-09	down	AT3G25130.1
Potri.002G248300	-1.21228	4.21979e-10	down	AT3G25230.1	rotamase FKBP 1
Potri.002G248400	1.22106	8.94662e-08	up	AT3G07330.1	Cellulose-synthase-like C6
Potri.002G248900	1.84025	3.63287e-23	up	AT3G25250.1	AGC (cAMP-dependent, cGMP-dependent and protein kinase C) kinase family protein
Potri.002G250100	-1.99362	0.000111134	down	AT3G07425.1
Potri.002G251600	-1.57035	2.89075e-14	down	AT5G48460.1	Actin binding Calponin homology (CH) domain-containing protein
Potri.002G251700	-1.17321	2.42021e-11	down	AT3G24660.1	transmembrane kinase-like 1
Potri.002G254600	-1.15192	4.3378e-10	down	AT2G20300.1	Protein kinase superfamily protein
Potri.002G256900	3.70675	2.8841e-18	up	AT4G17940.1	Tetratricopeptide repeat (TPR)-like superfamily protein
Potri.002G257700	-2.33406	4.08273e-40	down	AT1G04040.1	HAD superfamily, subfamily IIIB acid phosphatase
Potri.002G257900	-1.87973	3.4226e-27	down	AT5G44030.1	cellulose synthase A4
Potri.002G258500	-1.91973	6.94906e-21	down	AT1G04030.1
Potri.002G259900	1.30902	4.42051e-08	up	AT1G75220.1	Major facilitator superfamily protein
Potri.002G260800	2.09346	6.32876e-05	up
Potri.002G261000	1.18306	0.00335822	up	AT1G75170.1	Sec14p-like phosphatidylinositol transfer family protein
Potri.002G263600	1.11989	1.66532e-07	up	AT3G50700.1	indeterminate(ID)-domain 2
Potri.003G000800	-3.53861	3.4705e-07	down	AT1G59740.1	Major facilitator superfamily protein
Potri.003G001200	-1.16501	0.000110586	down	AT4G24265.1
Potri.003G003800	-2.38621	2.33131e-24	down
Potri.003G006300	-1.08346	1.71988e-09	down	AT5G49910.1	chloroplast heat shock protein 70-2
Potri.003G009300	1.41804	1.98492e-07	up	AT5G49940.1	NIFU-like protein 2
Potri.003G011200	4.34316	3.24446e-07	up
Potri.003G011600	3.13911	6.92955e-11	up	ATMG01360.1	cytochrome oxidase
Potri.003G012100	1.09279	0.00603592	up	AT1G15760.1	Sterile alpha motif (SAM) domain-containing protein
Potri.003G014200	1.82096	6.55586e-10	up	AT5G36930.2	Disease resistance protein (TIR-NBS-LRR class) family
Potri.003G015200	3.91972	5.89216e-15	up	AT1G60950.1	2Fe-2S ferredoxin-like superfamily protein
Potri.003G020200	-1.07204	0.00168959	down	AT5G64080.2	Bifunctional inhibitor/lipid-transfer protein/seed storage 2S albumin superfamily protein
Potri.003G022600	-1.1036	0.000100328	down	AT5G16850.1	telomerase reverse transcriptase
Potri.003G022900	-2.49212	4.36186e-07	down	AT5G64570.1	beta-D-xylosidase 4
Potri.003G034600	-1.13071	4.98275e-09	down	AT1G17710.1	Pyridoxal phosphate phosphatase-related protein
Potri.003G037600	2.49672	7.935e-06	up	AT1G17620.1	Late embryogenesis abundant (LEA) hydroxyproline-rich glycoprotein family
Potri.003G038500	-1.59459	1.36987e-19	down	AT3G13750.1	beta galactosidase 1
Potri.003G047800	-3.38176	1.9067e-06	down	AT3G16490.1	IQ-domain 26
Potri.003G052800	-1.51973	7.74945e-17	down	AT1G52240.2	RHO guanyl-nucleotide exchange factor 11
Potri.003G054000	1.7251	0.00977072	up
Potri.003G056200	2.04615	1.71462e-31	up	AT3G15990.1	sulfate transporter 3;4
Potri.003G057000	1.4551	0.00251977	up	AT5G67150.1	HXXXD-type acyl-transferase family protein
Potri.003G057100	1.95905	0.00183288	up	AT3G50280.1	HXXXD-type acyl-transferase family protein
Potri.003G058200	-1.81647	6.65738e-09	down	AT1G80370.1	Cyclin A2;4
Potri.003G058600	-1.58236	1.46601e-13	down	AT3G15550.1
Potri.003G059200	-1.06204	3.5579e-05	down	AT1G52760.1	lysophospholipase 2
Potri.003G060300	1.14838	4.24502e-05	up	AT1G52700.1	alpha/beta-Hydrolases superfamily protein
Potri.003G061400	-1.48699	0.000113655	down	AT3G15690.2	Single hybrid motif superfamily protein
Potri.003G061600	-2.67282	0.00132934	down	AT3G19360.1	Zinc finger (CCCH-type) family protein
Potri.003G063900	-1.07731	1.87215e-05	down	AT1G17455.1	ELF4-like 4
Potri.003G065100	4.48593	6.82469e-06	up	ATCG00360.1	Tetratricopeptide repeat (TPR)-like superfamily protein
Potri.003G066300	-1.59702	0.00314107	down	AT2G05940.1	Protein kinase superfamily protein
Potri.003G067300	3.66749	1.99301e-05	up	ATCG00170.1	DNA-directed RNA polymerase family protein
Potri.003G067400	4.21201	8.81983e-05	up	ATCG00640.1	ribosomal protein L33
Potri.003G067800	2.03622	4.57084e-13	up	AT1G72510.1	Protein of unknown function (DUF1677)
Potri.003G068300	2.41838	0.00104965	up	AT1G72490.1
Potri.003G068500	-1.17863	1.41272e-07	down	AT1G72480.1	Lung seven transmembrane receptor family protein
Potri.003G069700	-1.55433	0.000152903	down	AT5G66840.1	SAP domain-containing protein
Potri.003G070200	-2.53859	3.56746e-31	down	AT3G14170.1	Plant protein of unknown function (DUF936)
Potri.003G071100	-1.52484	6.5149e-18	down	AT1G54050.1	HSP20-like chaperones superfamily protein
Potri.003G072700	1.42783	2.96105e-11	up	AT1G53840.1	pectin methylesterase 1
Potri.003G073300	-1.1129	0.00019669	down	AT1G72310.1	RING/U-box superfamily protein
Potri.003G074400	1.02304	3.84112e-06	up	AT3G47640.1	basic helix-loop-helix (bHLH) DNA-binding superfamily protein
Potri.003G074600	-1.20183	0.000885344	down	AT4G20050.1	Pectin lyase-like superfamily protein
Potri.003G076000	-2.07684	1.03031e-30	down	AT4G25200.1	mitochondrion-localized small heat shock protein 23.6
Potri.003G077900	1.51344	3.24486e-11	up	AT4G17350.1	Plant protein of unknown function (DUF828) with plant pleckstrin homology-like region
Potri.003G081200	3.45661	1.74994e-20	up	AT4G17500.1	ethylene responsive element binding factor 1
Potri.003G081500	3.35415	5.62212e-17	up	AT4G16820.1	alpha/beta-Hydrolases superfamily protein
Potri.003G082700	-1.22595	1.25338e-11	down	AT5G47120.1	BAX inhibitor 1
Potri.003G083000	-2.37301	0.000145181	down
Potri.003G083400	-1.39329	1.29446e-05	down	AT5G43530.1	Helicase protein with RING/U-box domain
Potri.003G083700	-4.66797	6.25669e-30	down	AT5G04770.1	cationic amino acid transporter 6
Potri.003G083900	1.01502	2.31297e-06	up	AT4G17070.1	peptidyl-prolyl cis-trans isomerases
Potri.003G085300	1.41427	0.00137847	up	AT5G47070.1	Protein kinase superfamily protein
Potri.003G085700	-1.13237	1.68595e-08	down	AT4G17670.1	Protein of unknown function (DUF581)
Potri.003G087400	4.70771	6.89047e-17	up	AT4G21700.1	Protein of unknown function (DUF2921)
Potri.003G088400	1.24239	3.17064e-07	up	AT2G35390.2	Phosphoribosyltransferase family protein
Potri.003G089300	3.69056	2.32376e-10	up	AT1G32470.1	Single hybrid motif superfamily protein
Potri.003G089800	2.16061	3.90064e-15	up	AT5G46590.1	NAC domain containing protein 96
Potri.003G090100	1.70642	0.00891024	up	AT4G35470.1	plant intracellular ras group-related LRR 4
Potri.003G090300	-1.71639	0.000144784	down	AT1G32540.2	lsd one like 1
Potri.003G092200	1.47537	2.00783e-11	up	AT1G32640.1	Basic helix-loop-helix (bHLH) DNA-binding family protein
Potri.003G094100	1.23726	0.00108367	up	AT5G16760.1	Inositol 1,3,4-trisphosphate 5/6-kinase family protein
Potri.003G096100	1.06124	4.71599e-07	up	AT5G46910.1	Transcription factor jumonji (jmj) family protein / zinc finger (C5HC2 type) family protein
Potri.003G096900	-1.47288	0.000760828	down	AT1G32190.1	alpha/beta-Hydrolases superfamily protein
Potri.003G100200	-1.16633	0.000165125	down	AT1G32100.1	pinoresinol reductase 1
Potri.003G102300	-1.70978	1.05026e-06	down
Potri.003G102600	-1.07342	2.99877e-09	down	AT1G31850.1	S-adenosyl-L-methionine-dependent methyltransferases superfamily protein
Potri.003G103900	5.63506	1.67393e-28	up	AT1G32350.1	alternative oxidase 1D
Potri.003G104000	2.30601	4.39044e-08	up	AT5G45380.1	solute:sodium symporters;urea transmembrane transporters
Potri.003G106400	1.0326	0.000635297	up	AT1G31650.1	RHO guanyl-nucleotide exchange factor 14
Potri.003G107100	-3.17422	4.52578e-53	down	AT4G39730.1	Lipase/lipooxygenase, PLAT/LH2 family protein
Potri.003G107600	-1.31408	1.23236e-12	down	AT5G61480.1	Leucine-rich repeat protein kinase family protein
Potri.003G109200	-1.59297	8.68462e-15	down	AT4G25200.1	mitochondrion-localized small heat shock protein 23.6
Potri.003G111400	2.3155	2.41422e-35	up	AT4G12520.1	Bifunctional inhibitor/lipid-transfer protein/seed storage 2S albumin superfamily protein
Potri.003G112400	2.11732	0.00256469	up	AT4G12430.1	Haloacid dehalogenase-like hydrolase (HAD) superfamily protein
Potri.003G112600	-1.03309	1.88213e-07	down	AT1G12240.1	Glycosyl hydrolases family 32 protein
Potri.003G112700	-1.42301	7.11155e-15	down	AT4G12420.1	Cupredoxin superfamily protein
Potri.003G113000	-2.51846	0.000215895	down	AT1G12260.1	NAC 007
Potri.003G113100	5.66982	7.13176e-22	up	AT4G22620.1	SAUR-like auxin-responsive protein family
Potri.003G115200	1.43803	4.63088e-05	up	AT3G60780.1	Protein of unknown function (DUF1442)
Potri.003G115400	-1.05695	3.76609e-09	down	AT4G22740.1	glycine-rich protein
Potri.003G116000	-1.63313	3.00481e-19	down	AT4G12110.1	sterol-4alpha-methyl oxidase 1-1
Potri.003G116600	-1.23722	3.18645e-10	down	AT1G12420.1	ACT domain repeat 8
Potri.003G116700	-1.17898	0.00115868	down	AT4G22790.1	MATE efflux family protein
Potri.003G117200	-1.77772	7.97361e-09	down	AT3G60890.2	protein binding
Potri.003G117800	-2.0023	0.000185702	down	AT4G22860.1	Cell cycle regulated microtubule associated protein
Potri.003G118200	-1.34998	8.63502e-05	down	AT2G45550.1	cytochrome P450, family 76, subfamily C, polypeptide 4
Potri.003G119200	1.58135	6.09355e-06	up	AT4G22890.1	PGR5-LIKE A
Potri.003G119400	-1.18208	0.00025221	down	AT4G11950.1	Protein of unknown function (DUF1191)
Potri.003G121200	3.15633	0.000101445	up	AT5G52020.1	Integrase-type DNA-binding superfamily protein
Potri.003G122400	-2.11814	6.72638e-18	down	AT1G63100.1	GRAS family transcription factor
Potri.003G122900	1.77201	4.92999e-24	up	AT1G63120.1	RHOMBOID-like 2
Potri.003G123800	-1.667	0.00903036	down	AT4G32730.2	Homeodomain-like protein
Potri.003G124800	-1.69285	4.92937e-21	down	AT1G63430.1	Leucine-rich repeat protein kinase family protein
Potri.003G125400	-1.16095	1.04999e-05	down	AT5G23860.1	tubulin beta 8
Potri.003G127500	-1.03696	0.000810824	down	AT4G11450.1	Protein of unknown function (DUF3527)
Potri.003G127800	-1.31665	0.000712622	down	AT1G63640.2	P-loop nucleoside triphosphate hydrolases superfamily protein with CH (Calponin Homology) domain
Potri.003G132000	-1.87453	3.94333e-05	down	AT1G63910.1	myb domain protein 103
Potri.003G133100	1.56865	1.25911e-08	up	AT1G64050.1
Potri.003G133300	1.1581	4.89664e-07	up	AT1G64060.1	respiratory burst oxidase protein F
Potri.003G133400	-1.8554	0.00533994	down	AT2G46150.1	Late embryogenesis abundant (LEA) hydroxyproline-rich glycoprotein family
Potri.003G134200	1.07574	1.37735e-09	up	AT1G64140.1
Potri.003G136100	-1.05317	5.99736e-08	down	AT4G23740.1	Leucine-rich repeat protein kinase family protein
Potri.003G136600	-1.14932	1.6502e-08	down	AT3G61640.1	arabinogalactan protein 20
Potri.003G137000	-2.91832	1.00392e-12	down	AT1G64300.1	Protein kinase family protein
Potri.003G137700	1.263	6.48377e-05	up	AT3G61670.1	Protein of unknown function (DUF3133)
Potri.003G138600	2.30651	1.80234e-07	up	AT4G11070.1	WRKY family transcription factor
Potri.003G139300	2.26596	1.01962e-10	up	AT1G64380.1	Integrase-type DNA-binding superfamily protein
Potri.003G141100	-1.2436	1.82669e-05	down	AT4G10955.1	alpha/beta-Hydrolases superfamily protein
Potri.003G141800	2.68965	1.03691e-10	up	AT1G64500.1	Glutaredoxin family protein
Potri.003G141900	1.72505	9.92566e-05	up	AT5G42050.1	DCD (Development and Cell Death) domain protein
Potri.003G142800	3.24867	2.57209e-08	up	AT3G49290.1	ABL interactor-like protein 2
Potri.003G143000	1.36836	5.31029e-06	up	AT4G24020.1	NIN like protein 7
Potri.003G143600	-1.00019	4.02618e-08	down	AT5G42020.1	Heat shock protein 70 (Hsp 70) family protein
Potri.003G144400	1.224	0.00218211	up	AT5G42010.1	Transducin/WD40 repeat-like superfamily protein
Potri.003G144900	-1.49424	2.66706e-13	down	AT1G64625.2	Serine/threonine-protein kinase WNK (With No Lysine)-related
Potri.003G146800	-1.02523	6.15412e-09	down	AT2G46660.1	cytochrome P450, family 78, subfamily A, polypeptide 6
Potri.003G147800	2.80581	4.56154e-07	up	AT4G24110.1
Potri.003G148100	-2.93052	8.04738e-43	down	AT1G31335.1
Potri.003G149000	-1.08206	0.000451849	down	AT1G31320.1	LOB domain-containing protein 4
Potri.003G149800	1.95483	5.02758e-13	up	AT5G43470.1	Disease resistance protein (CC-NBS-LRR class) family
Potri.003G150000	7.34019	8.02773e-70	up	AT3G47570.1	Leucine-rich repeat protein kinase family protein
Potri.003G150100	4.38437	2.56702e-07	up	AT3G47570.1	Leucine-rich repeat protein kinase family protein
Potri.003G150700	1.98288	0.00261953	up	AT4G17500.1	ethylene responsive element binding factor 1
Potri.003G150800	3.94701	2.61912e-95	up	AT5G51190.1	Integrase-type DNA-binding superfamily protein
Potri.003G152300	1.04381	0.000115851	up
Potri.003G155700	-3.81342	3.23373e-15	down	AT3G12720.1	myb domain protein 67
Potri.003G156600	-1.24776	9.37593e-12	down	AT5G44670.1	Domain of unknown function (DUF23)
Potri.003G159200	1.58611	1.33142e-18	up	AT5G47900.1	Protein of unknown function (DUF1624)
Potri.003G159800	3.84895	2.77622e-06	up	AT5G47910.1	respiratory burst oxidase homologue D
Potri.003G164000	-1.09101	1.5169e-07	down	AT1G28110.1	serine carboxypeptidase-like 45
Potri.003G164200	-2.77925	1.44781e-08	down	AT1G03080.1	kinase interacting (KIP1-like) family protein
Potri.003G166100	1.19199	0.00149432	up	AT1G34210.1	somatic embryogenesis receptor-like kinase 2
Potri.003G168700	3.55291	2.87487e-08	up	AT5G14090.1
Potri.003G169400	1.52473	0.00170602	up	AT5G50670.1	Squamosa promoter-binding protein-like (SBP domain) transcription factor family protein
Potri.003G170000	2.18858	1.53431e-05	up	AT5G65070.1	K-box region and MADS-box transcription factor family protein
Potri.003G170300	1.24333	0.000163343	up	AT1G27290.1
Potri.003G171800	2.03219	5.43993e-13	up	AT5G43260.1	chaperone protein dnaJ-related
Potri.003G172300	1.15239	0.000849678	up	AT1G67330.1	Protein of unknown function (DUF579)
Potri.003G173200	-1.29577	0.00822481	down	AT1G67370.1	DNA-binding HORMA family protein
Potri.003G173300	-1.91845	6.09341e-14	down	AT1G27920.1	microtubule-associated protein 65-8
Potri.003G174200	1.42094	0.00173638	up	AT2G33205.1	Serinc-domain containing serine and sphingolipid biosynthesis protein
Potri.003G175300	-1.51867	0.00151535	down	AT1G04650.1
Potri.003G175900	-3.09394	4.76862e-66	down	AT4G13710.1	Pectin lyase-like superfamily protein
Potri.003G179800	-2.21888	0.00347474	down	AT1G80660.1	H(+)-ATPase 9
Potri.003G180900	1.62599	1.18821e-05	up	AT1G80760.1	NOD26-like intrinsic protein 6;1
Potri.003G182200	2.15038	6.84267e-11	up	AT1G80840.1	WRKY DNA-binding protein 40
Potri.003G182600	1.4661	7.64054e-17	up	AT2G07680.1	multidrug resistance-associated protein 11
Potri.003G183000	-4.00679	2.05176e-23	down	AT1G19780.1	cyclic nucleotide gated channel 8
Potri.003G183200	1.46395	1.04035e-06	up	AT1G15520.1	pleiotropic drug resistance 12
Potri.003G183900	-1.10207	9.24236e-09	down	AT5G48930.1	hydroxycinnamoyl-CoA shikimate/quinate hydroxycinnamoyl transferase
Potri.003G187500	-1.02344	3.78026e-05	down	AT5G43150.1
Potri.003G188300	1.8572	0.00169502	up
Potri.003G190000	1.09671	3.98701e-09	up	AT3G11450.1	DnaJ domain ;Myb-like DNA-binding domain
Potri.003G197400	-2.14703	1.13276e-10	down	AT3G54450.1	Major facilitator superfamily protein
Potri.003G199400	2.16733	1.48911e-16	up	AT3G14470.1	NB-ARC domain-containing disease resistance protein
Potri.003G200200	2.10273	1.32584e-06	up	AT3G14470.1	NB-ARC domain-containing disease resistance protein
Potri.003G201000	4.19604	4.37089e-13	up	AT1G20780.1	senescence-associated E3 ubiquitin ligase 1
Potri.003G201900	4.75935	9.21713e-07	up	AT3G14470.1	NB-ARC domain-containing disease resistance protein
Potri.003G202100	-1.46946	3.43236e-10	down	AT1G50420.1	scarecrow-like 3
Potri.003G202500	-1.03998	5.15651e-09	down	AT4G14270.1
Potri.003G203600	-1.24948	6.39329e-07	down	AT3G63440.1	cytokinin oxidase/dehydrogenase 6
Potri.003G206000	2.20461	8.03553e-07	up	AT5G12950.1	Putative glycosyl hydrolase of unknown function (DUF1680)
Potri.003G206300	1.4615	3.79698e-05	up	AT4G31980.1
Potri.003G206400	1.13202	0.000828746	up	AT4G31980.1
Potri.003G207400	-1.33938	0.000306786	down	AT5G12930.1
Potri.003G207600	1.03683	0.00782302	up	AT4G12070.1
Potri.003G207900	2.95206	8.88161e-07	up	AT4G31980.1
Potri.003G209000	3.77563	1.82638e-36	up	AT4G31980.1
Potri.003G210000	3.91906	2.71095e-06	up	AT4G31980.1
Potri.003G212900	-4.73591	5.75534e-20	down	AT5G19640.1	Major facilitator superfamily protein
Potri.003G214700	-1.08232	1.12216e-05	down	AT5G06720.1	peroxidase 2
Potri.003G215400	-1.41824	2.93899e-05	down	AT3G58040.1	seven in absentia of Arabidopsis 2
Potri.003G216200	-1.08037	1.77047e-05	down	AT1G55210.1	Disease resistance-responsive (dirigent-like protein) family protein
Potri.003G216500	1.55023	8.80307e-07	up	AT1G55230.1	Family of unknown function (DUF716)
Potri.003G218800	1.78305	0.000110888	up	AT3G13600.1	calmodulin-binding family protein
Potri.003G222600	2.89637	3.93423e-06	up	AT5G56460.1	Protein kinase superfamily protein
Potri.004G001000	-2.52072	1.82535e-06	down	AT3G17640.1	Leucine-rich repeat (LRR) family protein
Potri.004G003000	-2.59495	1.07713e-06	down	AT1G05010.1	ethylene-forming enzyme
Potri.004G003900	-2.09714	2.79169e-17	down	AT4G22190.1
Potri.004G004700	-1.22673	0.00707213	down	AT1G62360.1	KNOX/ELK homeobox transcription factor
Potri.004G007600	-1.43558	1.5437e-16	down	AT1G11910.1	aspartic proteinase A1
Potri.004G010100	-1.5491	2.13728e-05	down	AT4G22010.1	SKU5 similar 4
Potri.004G013500	-1.09621	1.40752e-05	down	AT1G62050.1	Ankyrin repeat family protein
Potri.004G014800	1.81726	4.86489e-09	up	AT4G04640.1	ATPase, F1 complex, gamma subunit protein
Potri.004G015500	1.5204	0.00029084	up	AT4G04720.1	calcium-dependent protein kinase 21
Potri.004G015700	1.16901	4.00681e-11	up	AT1G11700.1	Protein of unknown function, DUF584
Potri.004G017500	-1.15925	8.20244e-06	down	AT4G21820.1	binding;calmodulin binding
Potri.004G017700	3.99818	4.44476e-18	up	AT5G36110.1	cytochrome P450, family 716, subfamily A, polypeptide 1
Potri.004G018600	-1.3645	0.00174305	down	AT4G21780.1
Potri.004G019800	-1.16057	0.000107255	down	AT4G21760.1	beta-glucosidase 47
Potri.004G019900	2.87335	2.48795e-58	up	AT1G61800.1	glucose-6-phosphate/phosphate translocator 2
Potri.004G020000	5.46164	4.94306e-10	up	AT1G70880.1	Polyketide cyclase/dehydrase and lipid transport superfamily protein
Potri.004G021300	2.16617	1.64102e-09	up	AT2G46410.1	Homeodomain-like superfamily protein
Potri.004G025900	1.40464	1.60286e-05	up	AT4G05200.1	cysteine-rich RLK (RECEPTOR-like protein kinase) 25
Potri.004G026000	1.22462	0.00193623	up	AT4G05200.1	cysteine-rich RLK (RECEPTOR-like protein kinase) 25
Potri.004G026200	2.4953	0.00273631	up	AT4G05200.1	cysteine-rich RLK (RECEPTOR-like protein kinase) 25
Potri.004G027500	1.624	0.00178665	up	AT1G11350.1	S-domain-1 13
Potri.004G028800	1.05013	3.20136e-05	up	AT4G21350.1	plant U-box 8
Potri.004G029100	1.16333	6.19549e-11	up	AT1G61660.1	basic helix-loop-helix (bHLH) DNA-binding superfamily protein
Potri.004G029600	-1.1317	6.73775e-08	down	AT1G61667.1	Protein of unknown function, DUF538
Potri.004G031500	1.15786	1.24831e-09	up	AT4G05180.1	photosystem II subunit Q-2
Potri.004G032300	1.61257	1.09674e-11	up	AT4G05120.1	Major facilitator superfamily protein
Potri.004G033500	2.15012	8.09975e-20	up	AT4G21450.1	PapD-like superfamily protein
Potri.004G033900	1.27231	2.09734e-11	up	AT3G62980.1	F-box/RNI-like superfamily protein
Potri.004G035100	1.2619	3.69013e-10	up	AT5G57580.1	Calmodulin-binding protein
Potri.004G037200	-1.32101	0.00821665	down	AT1G11120.2
Potri.004G037800	4.47549	4.16529e-11	up	AT1G11080.2	serine carboxypeptidase-like 31
Potri.004G038100	1.23406	8.44211e-10	up	AT5G08370.1	alpha-galactosidase 2
Potri.004G038300	1.34384	1.72964e-09	up	AT1G61100.1	disease resistance protein (TIR class), putative
Potri.004G041000	2.02927	1.66989e-21	up	AT5G53750.1	CBS domain-containing protein
Potri.004G041900	-1.12386	3.23348e-06	down	AT1G65070.2	DNA mismatch repair protein MutS, type 2
Potri.004G042700	-1.33963	0.00951003	down	AT4G03510.1	RING membrane-anchor 1
Potri.004G048300	-1.2823	3.55663e-12	down	AT1G28400.1
Potri.004G048600	-1.12691	7.8383e-07	down	AT3G46970.1	alpha-glucan phosphorylase 2
Potri.004G048900	1.06318	3.32983e-09	up	AT5G46110.4	Glucose-6-phosphate/phosphate translocator-related
Potri.004G049100	-1.76407	3.88673e-24	down	AT1G28440.1	HAESA-like 1
Potri.004G051500	3.54476	1.20921e-76	up	AT5G28010.1	Polyketide cyclase/dehydrase and lipid transport superfamily protein
Potri.004G051800	3.0786	3.49093e-05	up	AT4G18450.1	Integrase-type DNA-binding superfamily protein
Potri.004G052100	-2.07706	4.27152e-09	down	AT2G34060.1	Peroxidase superfamily protein
Potri.004G052400	4.88898	1.31925e-09	up	AT2G29120.1	glutamate receptor 2.7
Potri.004G053500	1.93941	8.79271e-08	up	AT1G28680.1	HXXXD-type acyl-transferase family protein
Potri.004G055000	-1.8985	2.27344e-06	down	AT1G29050.1	TRICHOME BIREFRINGENCE-LIKE 38
Potri.004G056900	-1.44282	0.00822686	down	AT1G29160.1	Dof-type zinc finger DNA-binding family protein
Potri.004G057700	1.2806	0.000912652	up	AT1G09850.1	xylem bark cysteine peptidase 3
Potri.004G059100	-1.38028	0.0032257	down	AT5G45780.1	Leucine-rich repeat protein kinase family protein
Potri.004G059600	-1.79688	4.80084e-25	down	AT4G18780.1	cellulose synthase family protein
Potri.004G059900	1.46478	0.00271669	up	AT2G42760.1
Potri.004G060800	-2.35637	0.000788505	down	AT1G29270.1
Potri.004G061800	1.39926	1.63458e-08	up	AT1G29340.1	plant U-box 17
Potri.004G062000	-1.72161	4.40368e-09	down	AT1G17030.1
Potri.004G063000	-2.37832	0.000154475	down	AT4G18910.1	NOD26-like intrinsic protein 1;2
Potri.004G064000	1.35688	2.3164e-08	up	AT1G29690.1	MAC/Perforin domain-containing protein
Potri.004G067800	4.176	2.40486e-08	up	AT1G17860.1	Kunitz family trypsin and protease inhibitor protein
Potri.004G067900	2.40834	1.39734e-08	up	AT1G17860.1	Kunitz family trypsin and protease inhibitor protein
Potri.004G068000	2.30348	1.66864e-11	up	AT5G08350.1	GRAM domain-containing protein / ABA-responsive protein-related
Potri.004G068100	1.8659	1.26881e-09	up	AT5G23350.1	GRAM domain-containing protein / ABA-responsive protein-related
Potri.004G068200	2.043	0.00265364	up	AT5G23350.1	GRAM domain-containing protein / ABA-responsive protein-related
Potri.004G070200	1.02979	1.09504e-07	up	AT4G11260.1	phosphatase-related
Potri.004G071000	1.3703	0.0069833	up	AT3G16520.3	UDP-glucosyl transferase 88A1
Potri.004G071100	1.15516	1.38628e-08	up	AT4G11260.1	phosphatase-related
Potri.004G072000	-1.79038	8.47573e-05	down	AT5G52830.1	WRKY DNA-binding protein 27
Potri.004G072400	-1.11928	3.49476e-09	down	AT5G24060.1	Pentatricopeptide repeat (PPR) superfamily protein
Potri.004G073000	3.60583	4.16402e-52	up	AT1G01490.1	Heavy metal transport/detoxification superfamily protein
Potri.004G073600	-1.11885	2.04584e-07	down	AT5G52640.1	heat shock protein 90.1
Potri.004G075600	-1.01887	1.51149e-08	down	AT5G22480.1	ZPR1 zinc-finger domain protein
Potri.004G075800	2.20431	2.17699e-33	up	AT1G65840.1	polyamine oxidase 4
Potri.004G079700	1.51234	0.00277117	up	AT5G24010.1	Protein kinase superfamily protein
Potri.004G082000	1.30346	7.32759e-12	up	AT1G65880.1	benzoyloxyglucosinolate 1
Potri.004G084000	-1.26863	2.41504e-12	down	AT1G66150.1	transmembrane kinase 1
Potri.004G085600	2.18016	3.61161e-16	up	AT1G14860.1	nudix hydrolase homolog 18
Potri.004G086000	1.87591	1.29151e-07	up	AT5G37660.2	plasmodesmata-located protein 7
Potri.004G086400	-1.23767	1.93545e-07	down	AT1G66250.1	O-Glycosyl hydrolases family 17 protein
Potri.004G086700	1.81934	2.87058e-05	up	AT5G37690.1	SGNH hydrolase-type esterase superfamily protein
Potri.004G086900	1.20508	5.9293e-09	up	AT5G37710.1	alpha/beta-Hydrolases superfamily protein
Potri.004G088100	1.50957	0.0037377	up	AT4G09460.1	myb domain protein 6
Potri.004G088200	4.3842	2.61044e-35	up	AT2G01340.1
Potri.004G089300	1.14339	1.83346e-06	up	AT1G66430.1	pfkB-like carbohydrate kinase family protein
Potri.004G091300	5.55387	2.7727e-08	up	AT5G40010.1	AAA-ATPase 1
Potri.004G093500	-1.46842	1.18279e-05	down	AT2G01275.1	RING/FYVE/PHD zinc finger superfamily protein
Potri.004G093800	1.45927	0.00304144	up	AT5G39080.1	HXXXD-type acyl-transferase family protein
Potri.004G095100	-2.92371	6.33071e-18	down	AT1G66810.1	Zinc finger C-x8-C-x5-C-x3-H type family protein
Potri.004G095700	-2.1274	5.78164e-10	down	AT2G01210.1	Leucine-rich repeat protein kinase family protein
Potri.004G096000	3.01074	2.13027e-11	up	AT3G18280.1	Bifunctional inhibitor/lipid-transfer protein/seed storage 2S albumin superfamily protein
Potri.004G096600	1.20952	2.23779e-05	up	AT5G38210.1	Protein kinase family protein
Potri.004G098700	1.81059	0.000265164	up	AT1G67050.1
Potri.004G100000	2.11062	0.000134405	up	AT1G67090.1	ribulose bisphosphate carboxylase small chain 1A
Potri.004G102200	-1.2401	0.00388481	down	AT5G16030.1
Potri.004G105300	1.80045	1.55496e-18	up	AT5G15870.1	glycosyl hydrolase family 81 protein
Potri.004G105500	1.42024	0.00258221	up	AT5G15900.1	TRICHOME BIREFRINGENCE-LIKE 19
Potri.004G106000	-2.22608	0.000341826	down	AT1G67180.1	zinc finger (C3HC4-type RING finger) family protein / BRCT domain-containing protein
Potri.004G106600	4.13524	3.94898e-30	up	AT3G25180.1	cytochrome P450, family 82, subfamily G, polypeptide 1
Potri.004G106800	2.52516	3.57002e-44	up	AT3G02470.1	S-adenosylmethionine decarboxylase
Potri.004G117100	1.46057	5.1118e-09	up	AT3G02210.1	COBRA-like protein 1 precursor
Potri.004G117200	2.52191	0.0074612	up	AT5G15630.1	COBRA-like extracellular glycosyl-phosphatidyl inositol-anchored protein family
Potri.004G117800	1.32119	5.34867e-12	up	AT5G15650.1	reversibly glycosylated polypeptide 2
Potri.004G118000	-1.89364	0.00385719	down	AT3G30210.1	myb domain protein 121
Potri.004G118600	-1.59256	1.01237e-19	down	AT5G15490.1	UDP-glucose 6-dehydrogenase family protein
Potri.004G118700	-1.05417	0.00294586	down	AT5G15510.1	TPX2 (targeting protein for Xklp2) protein family
Potri.004G120300	2.53974	2.61467e-05	up	AT5G39210.1	chlororespiratory reduction 7
Potri.004G122900	3.89222	7.19205e-06	up	AT5G39670.1	Calcium-binding EF-hand family protein
Potri.004G129400	-1.02668	0.000186635	down	AT5G39890.1	Protein of unknown function (DUF1637)
Potri.004G135500	1.69004	2.03418e-12	up	AT1G07650.1	Leucine-rich repeat transmembrane protein kinase
Potri.004G137600	-1.72359	2.33225e-07	down	AT2G40980.1	Protein kinase superfamily protein
Potri.004G138200	-1.75186	0.00014118	down	AT1G72160.1	Sec14p-like phosphatidylinositol transfer family protein
Potri.004G138300	1.4584	0.000117726	up	AT1G10940.1	Protein kinase superfamily protein
Potri.004G140300	-1.23622	0.00473876	down	AT3G19300.1	Protein kinase superfamily protein
Potri.004G140800	1.35077	4.8668e-05	up	AT2G15620.1	nitrite reductase 1
Potri.004G141200	4.42034	9.07048e-25	up	AT4G34410.1	redox responsive transcription factor 1
Potri.004G143300	-1.31501	0.000463666	down	AT2G15730.1	P-loop containing nucleoside triphosphate hydrolases superfamily protein
Potri.004G144800	-1.11253	1.25321e-06	down	AT1G49560.1	Homeodomain-like superfamily protein
Potri.004G146000	-1.47079	0.00197377	down	AT3G19000.1	2-oxoglutarate (2OG) and Fe(II)-dependent oxygenase superfamily protein
Potri.004G148200	1.45458	0.00280486	up	AT2G15960.1
Potri.004G149800	2.63682	2.72161e-11	up	AT5G66580.1
Potri.004G150800	2.6681	3.44982e-06	up	AT4G34320.1	Protein of unknown function (DUF677)
Potri.004G152300	4.88975	1.40752e-05	up	AT3G18830.1	polyol/monosaccharide transporter 5
Potri.004G152800	-1.00412	0.00204423	down	AT1G11755.1	Undecaprenyl pyrophosphate synthetase family protein
Potri.004G153800	1.46503	6.84876e-15	up	AT4G34480.1	O-Glycosyl hydrolases family 17 protein
Potri.004G154000	-1.56355	1.00703e-12	down	AT4G34500.1	Protein kinase superfamily protein
Potri.004G157100	-1.22868	5.20562e-11	down	AT4G39210.1	Glucose-1-phosphate adenylyltransferase family protein
Potri.004G161500	2.50606	4.1168e-36	up	AT5G66320.1	GATA transcription factor 5
Potri.004G162200	-2.0101	0.00225328	down	AT4G39010.1	glycosyl hydrolase 9B18
Potri.004G162400	2.8551	0.000887982	up	AT4G38970.1	fructose-bisphosphate aldolase 2
Potri.004G163300	1.0424	5.35635e-09	up	AT4G34710.1	arginine decarboxylase 2
Potri.004G164000	1.13806	0.000100772	up	AT4G34740.1	GLN phosphoribosyl pyrophosphate amidotransferase 2
Potri.004G164300	-1.70183	1.78136e-07	down	AT5G10990.1	SAUR-like auxin-responsive protein family
Potri.004G164400	-2.08981	4.57247e-17	down	AT4G34760.1	SAUR-like auxin-responsive protein family
Potri.004G167500	1.79526	3.98326e-13	up	AT4G34860.1	Plant neutral invertase family protein
Potri.004G172700	1.98454	4.48042e-06	up	AT1G22340.1	UDP-glucosyl transferase 85A7
Potri.004G172800	-1.87638	7.48408e-27	down	AT2G21050.1	like AUXIN RESISTANT 2
Potri.004G173300	-1.54734	6.0918e-08	down	AT4G38650.1	Glycosyl hydrolase family 10 protein
Potri.004G173400	1.92704	7.26128e-27	up	AT4G34950.1	Major facilitator superfamily protein
Potri.004G173800	-1.58043	7.02403e-18	down	AT2G16700.1	actin depolymerizing factor 5
Potri.004G173900	-1.37694	2.89612e-15	down	AT4G34980.1	subtilisin-like serine protease 2
Potri.004G174100	1.46928	0.000913308	up	AT2G17840.1	Senescence/dehydration-associated protein-related
Potri.004G174400	-1.09056	0.000127551	down	AT4G38620.1	myb domain protein 4
Potri.004G175500	1.62946	0.000279741	up	AT4G35070.1	SBP (S-ribonuclease binding protein) family protein
Potri.004G175700	1.17128	0.00691014	up	AT2G16800.1	high-affinity nickel-transport family protein
Potri.004G175800	2.31257	4.65467e-19	up	AT1G68010.1	hydroxypyruvate reductase
Potri.004G176300	-1.15368	4.40109e-11	down	AT4G35100.1	plasma membrane intrinsic protein 3
Potri.004G177400	2.00148	0.000716554	up	AT4G14210.1	phytoene desaturase 3
Potri.004G179500	-2.39488	0.00050369	down	AT4G38470.1	ACT-like protein tyrosine kinase family protein
Potri.004G181100	-1.37292	1.95847e-08	down	AT1G47670.1	Transmembrane amino acid transporter family protein
Potri.004G181800	-2.54419	0.000151175	down	AT4G35190.1	Putative lysine decarboxylase family protein
Potri.004G184800	1.12665	0.0020419	up	AT2G27610.1	Tetratricopeptide repeat (TPR)-like superfamily protein
Potri.004G185000	1.97118	7.4408e-06	up	AT4G33790.1	Jojoba acyl CoA reductase-related male sterility protein
Potri.004G185300	2.67252	1.06759e-12	up	AT2G27690.1	cytochrome P450, family 94, subfamily C, polypeptide 1
Potri.004G186200	1.07593	0.00325539	up	AT3G44610.1	Protein kinase superfamily protein
Potri.004G187200	-1.07147	2.69747e-05	down	AT1G07400.1	HSP20-like chaperones superfamily protein
Potri.004G187400	-1.85148	1.97019e-10	down	AT1G07400.1	HSP20-like chaperones superfamily protein
Potri.004G188200	1.32208	0.000295139	up	AT3G44735.1	PHYTOSULFOKINE 3 PRECURSOR
Potri.004G188400	-1.2351	0.00478667	down	AT5G22640.2	MORN (Membrane Occupation and Recognition Nexus) repeat-containing protein
Potri.004G188600	1.26989	1.14508e-10	up	AT2G27830.1
Potri.004G189800	-1.8012	9.75441e-08	down	AT3G44820.1	Phototropic-responsive NPH3 family protein
Potri.004G189900	1.59984	2.48492e-19	up	AT1G08200.1	UDP-D-apiose/UDP-D-xylose synthase 2
Potri.004G190100	-1.3986	1.18791e-09	down	AT3G44830.1	Lecithin:cholesterol acyltransferase family protein
Potri.004G190200	-1.15648	0.00076403	down	AT1G08390.1
Potri.004G190500	1.7432	0.00517897	up	AT2G27180.1
Potri.004G193000	-1.5471	2.29637e-05	down	AT5G20930.1	Protein kinase superfamily protein
Potri.004G193300	-1.33584	1.53893e-07	down	AT5G20930.1	Protein kinase superfamily protein
Potri.004G196600	-1.16343	1.39652e-06	down	AT5G21070.1
Potri.004G197600	1.68937	2.42628e-11	up	AT2G27080.1	Late embryogenesis abundant (LEA) hydroxyproline-rich glycoprotein family
Potri.004G199400	1.11523	6.47772e-08	up	AT1G08380.1	photosystem I subunit O
Potri.004G200100	1.10112	8.55152e-06	up	AT3G26770.1	NAD(P)-binding Rossmann-fold superfamily protein
Potri.004G202200	3.97121	2.95064e-06	up	AT2G27480.1	Calcium-binding EF-hand family protein
Potri.004G204500	-1.1722	0.00231611	down
Potri.004G205000	1.2259	3.65569e-07	up	AT5G42340.1	Plant U-Box 15
Potri.004G207600	-2.6388	1.44138e-09	down	AT4G35350.1	xylem cysteine peptidase 1
Potri.004G208500	3.19477	6.84853e-10	up	AT1G76490.1	hydroxy methylglutaryl CoA reductase 1
Potri.004G209200	-1.08932	2.51169e-09	down	AT2G16050.1	Cysteine/Histidine-rich C1 domain family protein
Potri.004G209700	1.63196	1.23128e-12	up	AT5G58140.1	phototropin 2
Potri.004G210400	-1.05004	5.41382e-07	down	AT5G60600.1	4-hydroxy-3-methylbut-2-enyl diphosphate synthase
Potri.004G211000	-2.5668	4.74088e-05	down	AT2G28410.1
Potri.004G211600	-1.82533	1.41166e-25	down	AT3G45180.1	Ubiquitin-like superfamily protein
Potri.004G211900	-2.14071	9.89223e-26	down	AT2G28315.1	Nucleotide/sugar transporter family protein
Potri.004G214700	2.31456	2.09224e-24	up	AT5G60800.2	Heavy metal transport/detoxification superfamily protein
Potri.004G216000	-1.73833	1.69178e-08	down	AT5G04320.2	Shugoshin C terminus
Potri.004G216200	-1.01614	0.000202511	down	AT2G28150.1	Domain of unknown function (DUF966)
Potri.004G216500	1.60944	5.39161e-12	up	AT2G36830.1	gamma tonoplast intrinsic protein
Potri.004G218400	2.71388	4.8398e-34	up	AT1G60950.1	2Fe-2S ferredoxin-like superfamily protein
Potri.004G218500	-1.84166	3.7478e-17	down	AT1G11000.1	Seven transmembrane MLO family protein
Potri.004G220100	3.47437	6.45158e-05	up	AT1G35520.1	auxin response factor 15
Potri.004G221800	2.44787	0.000290841	up	AT5G23170.1	Protein kinase superfamily protein
Potri.004G222100	1.4423	0.00300023	up	AT1G58100.1	TCP family transcription factor
Potri.004G222400	2.65253	2.33925e-05	up	AT1G09795.1	ATP phosphoribosyl transferase 2
Potri.004G222800	-3.3349	1.58447e-05	down	AT1G58070.1
Potri.004G226800	-3.21523	9.652e-25	down	AT1G09610.1	Protein of unknown function (DUF579)
Potri.004G228300	1.19162	9.6747e-06	up	AT5G49890.1	chloride channel C
Potri.004G229000	-1.02962	0.00156044	down	AT1G59740.1	Major facilitator superfamily protein
Potri.004G231100	-1.53331	0.00158465	down	AT3G05390.1
Potri.004G231200	4.37212	7.57343e-09	up	AT5G49760.1	Leucine-rich repeat protein kinase family protein
Potri.004G231600	4.08722	1.02008e-07	up	AT5G49760.1	Leucine-rich repeat protein kinase family protein
Potri.004G232800	-1.18752	2.18168e-06	down	AT5G07620.1	Protein kinase superfamily protein
Potri.004G234900	3.13456	3.3776e-05	up	AT4G19380.1	Long-chain fatty alcohol dehydrogenase family protein
Potri.004G235400	3.02863	4.15658e-21	up	AT4G19230.1	cytochrome P450, family 707, subfamily A, polypeptide 1
Potri.004G236100	1.26843	2.07193e-11	up
Potri.005G001300	-1.28207	4.54438e-08	down	AT3G62020.1	germin-like protein 10
Potri.005G001600	-2.60825	1.1527e-42	down	AT1G09540.1	myb domain protein 61
Potri.005G001700	-1.17978	1.42804e-10	down	AT3G05900.1	neurofilament protein-related
Potri.005G003000	1.01608	7.19696e-06	up	AT5G26600.1	Pyridoxal phosphate (PLP)-dependent transferases superfamily protein
Potri.005G003300	-1.11985	3.44962e-10	down	AT1G56720.1	Protein kinase superfamily protein
Potri.005G003400	-1.14217	0.000809583	down	AT1G09450.1	Protein kinase superfamily protein
Potri.005G003500	-1.20674	7.77628e-09	down	AT2G05790.1	O-Glycosyl hydrolases family 17 protein
Potri.005G004800	-1.19499	0.00174455	down
Potri.005G005900	-1.03322	0.00535161	down	AT1G09420.2	glucose-6-phosphate dehydrogenase 4
Potri.005G006300	-2.15727	4.44063e-10	down
Potri.005G010700	3.45348	4.58919e-07	up	AT4G15510.1	Photosystem II reaction center PsbP family protein
Potri.005G012000	-1.29216	0.00202363	down	AT5G49525.1
Potri.005G013000	-1.70008	0.000219989	down	AT1G18610.1	Galactose oxidase/kelch repeat superfamily protein
Potri.005G014300	2.216	5.37491e-07	up	AT1G09240.1	nicotianamine synthase 3
Potri.005G015000	1.37093	2.73904e-12	up	AT1G15690.1	Inorganic H pyrophosphatase family protein
Potri.005G015600	-1.8066	0.00103508	down	AT1G18610.1	Galactose oxidase/kelch repeat superfamily protein
Potri.005G017100	-1.41704	2.77836e-09	down	AT1G56440.1	Tetratricopeptide repeat (TPR)-like superfamily protein
Potri.005G017300	2.43879	1.92125e-05	up	AT1G09240.1	nicotianamine synthase 3
Potri.005G018700	1.47776	5.87917e-13	up	AT1G15690.1	Inorganic H pyrophosphatase family protein
Potri.005G020000	-1.4053	3.41878e-12	down	AT1G56310.1	Polynucleotidyl transferase, ribonuclease H-like superfamily protein
Potri.005G021100	-1.37846	1.38335e-10	down	AT5G27000.1	kinesin 4
Potri.005G021200	-1.22653	1.6987e-11	down	AT1G09160.1	Protein phosphatase 2C family protein
Potri.005G021900	-1.21127	3.69356e-11	down	AT5G27930.1	Protein phosphatase 2C family protein
Potri.005G023800	1.91578	0.00151584	up	AT1G50830.1	Aminotransferase-like, plant mobile domain family protein
Potri.005G024100	1.15559	4.42874e-10	up	AT3G05580.1	Calcineurin-like metallo-phosphoesterase superfamily protein
Potri.005G024800	1.67951	3.41858e-17	up	AT3G16640.1	translationally controlled tumor protein
Potri.005G025300	-1.14631	0.00254785	down	AT3G05520.2	Subunits of heterodimeric actin filament capping protein Capz superfamily
Potri.005G025800	1.63611	2.73566e-10	up	AT4G15800.1	ralf-like 33
Potri.005G026700	3.29048	8.59841e-58	up	AT1G09070.1	soybean gene regulated by cold-2
Potri.005G030500	1.03511	3.52308e-06	up	AT5G27550.1	P-loop containing nucleoside triphosphate hydrolases superfamily protein
Potri.005G030700	1.98423	0.0038694	up	AT1G69550.1	disease resistance protein (TIR-NBS-LRR class)
Potri.005G031200	2.56175	2.28141e-13	up	AT4G12010.1	Disease resistance protein (TIR-NBS-LRR class) family
Potri.005G031400	1.8245	0.0022825	up
Potri.005G031800	1.36184	1.79189e-07	up	AT5G27550.1	P-loop containing nucleoside triphosphate hydrolases superfamily protein
Potri.005G032400	3.72075	2.50002e-07	up	AT1G55020.1	lipoxygenase 1
Potri.005G032700	3.61647	1.62065e-05	up	AT1G55020.1	lipoxygenase 1
Potri.005G032800	1.01205	1.66625e-08	up	AT1G55020.1	lipoxygenase 1
Potri.005G033200	-1.79807	5.24437e-07	down	AT3G05330.1	cyclin family
Potri.005G033400	-1.51029	1.10021e-06	down	AT1G09000.1	NPK1-related protein kinase 1
Potri.005G034900	1.79206	0.00480238	up	AT3G07040.1	NB-ARC domain-containing disease resistance protein
Potri.005G035700	1.80863	9.62462e-08	up	AT3G07040.1	NB-ARC domain-containing disease resistance protein
Potri.005G036800	1.65483	2.03678e-10	up	AT3G05200.1	RING/U-box superfamily protein
Potri.005G037000	1.41542	0.000968023	up	AT1G08920.1	ERD (early response to dehydration) six-like 1
Potri.005G037300	2.29039	0.000204979	up	AT1G08900.1	Major facilitator superfamily protein
Potri.005G037800	1.21543	0.00655018	up	AT1G78370.1	glutathione S-transferase TAU 20
Potri.005G038700	3.56743	5.75746e-06	up	AT1G54780.1	thylakoid lumen 18.3 kDa protein
Potri.005G039800	-2.22649	7.49391e-37	down	AT1G72210.1	basic helix-loop-helix (bHLH) DNA-binding superfamily protein
Potri.005G040400	-1.50626	8.85672e-05	down	AT3G21510.1	histidine-containing phosphotransmitter 1
Potri.005G046300	-1.09526	1.30669e-05	down	AT3G05100.1	S-adenosyl-L-methionine-dependent methyltransferases superfamily protein
Potri.005G049300	2.08519	9.09352e-10	up	AT5G28050.1	Cytidine/deoxycytidylate deaminase family protein
Potri.005G053000	1.30922	6.20948e-14	up	AT5G28840.1	GDP-D-mannose 3\',5\'-epimerase
Potri.005G053500	2.71251	0.000344681	up	AT4G02590.1	basic helix-loop-helix (bHLH) DNA-binding superfamily protein
Potri.005G053800	-1.51725	8.15427e-05	down	AT5G43700.1	AUX/IAA transcriptional regulator family protein
Potri.005G054100	-3.57813	2.40902e-07	down	AT2G30580.1	DREB2A-interacting protein 2
Potri.005G054400	1.66079	4.87522e-07	up	AT2G30580.1	DREB2A-interacting protein 2
Potri.005G057300	-1.07938	5.95235e-07	down	AT1G49160.2	Protein kinase superfamily protein
Potri.005G057400	-1.91105	0.00486626	down	AT5G64667.1	inflorescence deficient in abscission (IDA)-like 2
Potri.005G058400	1.55224	6.29801e-05	up	AT4G03520.1	Thioredoxin superfamily protein
Potri.005G059600	-1.05008	1.48309e-07	down	AT5G64600.1	O-fucosyltransferase family protein
Potri.005G061600	-2.64456	4.36146e-15	down	AT3G18660.2	plant glycogenin-like starch initiation protein 1
Potri.005G061800	-1.41909	0.000725015	down	AT1G62630.1	Disease resistance protein (CC-NBS-LRR class) family
Potri.005G065200	-1.48776	9.27499e-05	down	AT5G64030.1	S-adenosyl-L-methionine-dependent methyltransferases superfamily protein
Potri.005G067000	-1.45647	1.46571e-09	down	AT1G77280.1	Protein kinase protein with adenine nucleotide alpha hydrolases-like domain
Potri.005G068700	4.89962	3.7478e-17	up	AT3G52430.1	alpha/beta-Hydrolases superfamily protein
Potri.005G069100	1.17379	7.51427e-06	up	AT4G19170.1	nine-cis-epoxycarotenoid dioxygenase 4
Potri.005G069500	2.45771	2.66367e-15	up	AT1G01720.1	NAC (No Apical Meristem) domain transcriptional regulator superfamily protein
Potri.005G070300	-1.05421	0.000498794	down	AT5G64440.1	fatty acid amide hydrolase
Potri.005G070600	-1.70107	2.91829e-07	down	AT4G08330.1
Potri.005G070900	3.06731	1.96933e-39	up	AT5G63770.1	diacylglycerol kinase 2
Potri.005G071300	2.35996	5.5944e-13	up	AT5G10380.1	RING/U-box superfamily protein
Potri.005G072000	3.77324	1.28537e-05	up	AT5G65300.1
Potri.005G073300	1.94394	3.32114e-06	up	AT4G39980.1	3-deoxy-D-arabino-heptulosonate 7-phosphate synthase 1
Potri.005G076500	1.83538	2.71578e-09	up	AT4G39840.1
Potri.005G076800	-1.71814	2.06641e-08	down	AT5G65160.1	tetratricopeptide repeat (TPR)-containing protein
Potri.005G076900	-1.45663	5.78579e-17	down	AT2G22170.1	Lipase/lipooxygenase, PLAT/LH2 family protein
Potri.005G078300	-1.08209	6.28668e-09	down	AT5G10150.1	Domain of unknown function (DUF966)
Potri.005G078500	1.0432	1.25208e-08	up
Potri.005G078600	-1.02502	5.45187e-06	down	AT1G78020.1	Protein of unknown function (DUF581)
Potri.005G078700	1.97197	1.21178e-29	up	AT5G10170.1	myo-inositol-1-phosphate synthase 3
Potri.005G079000	1.37402	3.76802e-06	up	AT5G10180.1	slufate transporter 2;1
Potri.005G082800	3.18332	9.4103e-07	up	AT4G39640.1	gamma-glutamyl transpeptidase 1
Potri.005G083400	1.45477	3.60171e-13	up	AT4G14540.1	nuclear factor Y, subunit B3
Potri.005G086400	-2.61625	4.32559e-14	down	AT4G39410.1	WRKY DNA-binding protein 13
Potri.005G086500	1.35797	1.96797e-09	up	AT4G39400.1	Leucine-rich receptor-like protein kinase family protein
Potri.005G087200	6.24905	1.23748e-22	up	AT5G64750.1	Integrase-type DNA-binding superfamily protein
Potri.005G087500	1.69658	1.47616e-22	up	AT5G64740.1	cellulose synthase 6
Potri.005G087900	-1.26994	0.00293706	down	AT1G14610.1	valyl-tRNA synthetase / valine--tRNA ligase (VALRS)
Potri.005G088700	-1.08311	0.00555716	down	AT5G08350.1	GRAM domain-containing protein / ABA-responsive protein-related
Potri.005G089900	-2.72143	0.000138638	down
Potri.005G090700	-2.05058	0.00607068	down	AT3G19940.1	Major facilitator superfamily protein
Potri.005G092200	4.08546	1.3037e-08	up	AT5G23190.1	cytochrome P450, family 86, subfamily B, polypeptide 1
Potri.005G094700	2.15884	5.17922e-10	up	AT3G19800.1	Protein of unknown function (DUF177)
Potri.005G094900	-1.04097	1.44445e-06	down	AT1G56170.1	nuclear factor Y, subunit C2
Potri.005G096200	2.30019	3.51563e-20	up
Potri.005G098300	1.4874	0.00497136	up	AT1G79060.1
Potri.005G098400	1.41361	4.47879e-07	up	AT2G36650.1
Potri.005G098700	1.58528	0.00696018	up	AT3G55620.1	Translation initiation factor IF6
Potri.005G099700	2.43509	3.47496e-22	up	AT4G35640.1	serine acetyltransferase 3;2
Potri.005G101700	2.07266	1.36895e-08	up	AT2G17550.1
Potri.005G107700	1.8755	4.02635e-11	up	AT2G17705.1
Potri.005G107800	1.40029	0.00127866	up	AT2G17710.1
Potri.005G108700	1.99513	3.4622e-15	up	AT2G17760.1	Eukaryotic aspartyl protease family protein
Potri.005G109600	-2.29679	1.43928e-07	down	AT3G51325.1	RING/U-box superfamily protein
Potri.005G110000	-1.47946	3.57561e-17	down	AT4G35920.1	PLAC8 family protein
Potri.005G110200	-2.07605	1.65138e-17	down	AT4G35930.1	F-box family protein
Potri.005G110400	-2.56289	1.8819e-45	down	AT5G66110.1	Heavy metal transport/detoxification superfamily protein
Potri.005G112900	2.52446	5.15222e-16	up	AT5G66190.1	ferredoxin-NADP(+)-oxidoreductase 1
Potri.005G113600	3.0361	2.09586e-10	up	AT5G66210.1	calcium-dependent protein kinase 28
Potri.005G114400	-2.33471	0.000913618	down	AT2G17940.1	Plant protein of unknown function (DUF827)
Potri.005G115800	-1.6822	0.000731489	down	AT2G13810.1	AGD2-like defense response protein 1
Potri.005G117100	1.62045	1.97889e-14	up	AT4G38960.1	B-box type zinc finger family protein
Potri.005G117300	1.34837	4.90719e-06	up	AT3G51120.1	DNA binding;zinc ion binding;nucleic acid binding;nucleic acid binding
Potri.005G117500	-3.08764	5.29324e-60	down	AT4G36220.1	ferulic acid 5-hydroxylase 1
Potri.005G117800	-1.72664	8.72978e-07	down	AT5G66330.1	Leucine-rich repeat (LRR) family protein
Potri.005G118700	2.37012	3.96431e-26	up	AT5G66390.1	Peroxidase superfamily protein
Potri.005G119200	2.3882	4.46569e-21	up	AT1G43910.1	P-loop containing nucleoside triphosphate hydrolases superfamily protein
Potri.005G119800	2.0104	2.1975e-08	up	AT3G50950.1	HOPZ-ACTIVATED RESISTANCE 1
Potri.005G120500	-2.03766	1.11319e-17	down	AT5G66460.1	Glycosyl hydrolase superfamily protein
Potri.005G122400	3.28163	1.40734e-12	up	AT4G36600.1	Late embryogenesis abundant (LEA) protein
Potri.005G122500	2.3097	6.80525e-15	up	AT2G18350.1	homeobox protein 24
Potri.005G124200	2.45848	1.11191e-08	up	AT2G25737.1	Sulfite exporter TauE/SafE family protein
Potri.005G127800	-2.06389	5.54549e-17	down	AT2G23790.1	Protein of unknown function (DUF607)
Potri.005G131600	-1.78537	4.44879e-22	down	AT3G50410.1	OBF binding protein 1
Potri.005G132300	2.4104	0.00104965	up
Potri.005G137500	-1.68462	4.15532e-08	down	AT3G19150.1	KIP-related protein 6
Potri.005G139200	2.40028	4.4993e-05	up	AT5G67080.1	mitogen-activated protein kinase kinase kinase 19
Potri.005G139300	5.54991	4.91814e-36	up	AT5G67080.1	mitogen-activated protein kinase kinase kinase 19
Potri.005G140400	1.68284	0.000345034	up	AT2G23200.1	Protein kinase superfamily protein
Potri.005G141300	-2.19629	1.38685e-17	down	AT5G67210.1	Protein of unknown function (DUF579)
Potri.005G141800	2.45939	2.47523e-35	up	AT5G67250.1	SKP1/ASK1-interacting protein 2
Potri.005G141900	-1.43378	5.41375e-14	down	AT5G67260.1	CYCLIN D3;2
Potri.005G142300	1.45425	1.44294e-14	up	AT4G37250.1	Leucine-rich repeat protein kinase family protein
Potri.005G143200	2.01885	7.69612e-11	up	AT2G23200.1	Protein kinase superfamily protein
Potri.005G143400	3.15258	3.92486e-08	up	AT5G24010.1	Protein kinase superfamily protein
Potri.005G143500	1.89681	0.000142416	up	AT2G23200.1	Protein kinase superfamily protein
Potri.005G144100	1.86604	0.00443987	up	AT5G24010.1	Protein kinase superfamily protein
Potri.005G145100	2.53239	5.7153e-20	up	AT5G67350.1
Potri.005G145300	1.94144	1.12181e-15	up	AT5G67360.1	Subtilase family protein
Potri.005G145500	2.38493	4.11215e-11	up	AT3G49940.1	LOB domain-containing protein 38
Potri.005G146900	1.49143	5.71664e-15	up	AT4G07960.1	Cellulose-synthase-like C12
Potri.005G147300	-1.09898	0.00305551	down	AT1G09720.1	Kinase interacting (KIP1-like) family protein
Potri.005G150200	3.77463	0.000263202	up	ATCG00500.1	acetyl-CoA carboxylase carboxyl transferase subunit beta
Potri.005G154300	3.75756	0.000192923	up	ATCG00830.1	ribosomal protein L2
Potri.005G154500	2.21637	0.00567967	up	ATCG00070.1	photosystem II reaction center protein K precursor
Potri.005G154600	4.05631	8.58273e-05	up	ATCG00120.1	ATP synthase subunit alpha
Potri.005G154700	4.3534	0.000145367	up	ATCG00130.1	ATPase, F0 complex, subunit B/B\', bacterial/chloroplast
Potri.005G154900	4.22415	0.000224877	up	ATCG00140.1	ATP synthase subunit C family protein
Potri.005G156700	1.48818	0.00492541	up	AT5G49700.1	Predicted AT-hook DNA-binding family protein
Potri.005G160200	-1.36647	9.9748e-14	down	AT1G28210.2	DNAJ heat shock family protein
Potri.005G160300	3.5208	3.93338e-06	up	AT1G28220.1	purine permease 3
Potri.005G160900	-1.87355	1.22161e-07	down	AT1G72200.1	RING/U-box superfamily protein
Potri.005G161100	1.94577	1.29904e-22	up
Potri.005G161900	1.13539	0.000129323	up	AT4G09010.1	ascorbate peroxidase 4
Potri.005G162300	1.11105	0.00742068	up	AT1G78310.1	VQ motif-containing protein
Potri.005G163000	2.11869	0.00508147	up	AT5G64260.1	EXORDIUM like 2
Potri.005G163500	2.70151	4.10329e-12	up	AT4G08950.1	Phosphate-responsive 1 family protein
Potri.005G163700	2.96416	5.92903e-56	up	AT4G08950.1	Phosphate-responsive 1 family protein
Potri.005G164000	1.45196	2.18619e-07	up	AT1G78230.1	Outer arm dynein light chain 1 protein
Potri.005G164600	1.14956	2.8044e-06	up	AT1G34750.1	Protein phosphatase 2C family protein
Potri.005G167300	1.96968	1.76169e-20	up	AT1G22150.1	sulfate transporter 1;3
Potri.005G169300	2.2596	1.39875e-23	up	AT1G22150.1	sulfate transporter 1;3
Potri.005G171600	-1.71407	1.95013e-05	down	AT1G36940.2
Potri.005G172200	1.44364	2.31388e-07	up	AT4G08500.1	MAPK/ERK kinase kinase 1
Potri.005G172900	1.52176	5.77719e-17	up	AT4G08180.1	OSBP(oxysterol binding protein)-related protein 1C
Potri.005G177600	2.24821	0.00193334	up	AT1G21830.1
Potri.005G179200	1.08247	0.00136547	up	AT1G77490.1	thylakoidal ascorbate peroxidase
Potri.005G181400	-1.47683	1.44673e-09	down	AT1G44110.1	Cyclin A1;1
Potri.005G181600	1.51026	0.000131065	up	AT1G77380.1	amino acid permease 3
Potri.005G184500	1.56902	4.63112e-05	up	AT2G34300.1	S-adenosyl-L-methionine-dependent methyltransferases superfamily protein
Potri.005G185600	1.27155	3.78599e-11	up	AT1G76990.1	ACT domain repeat 3
Potri.005G186500	2.06754	8.06418e-13	up	AT1G21450.1	SCARECROW-like 1
Potri.005G186800	1.71513	0.000858296	up	AT3G15360.1	thioredoxin M-type 4
Potri.005G187300	2.73543	1.23897e-20	up	AT1G21460.1	Nodulin MtN3 family protein
Potri.005G187500	-1.57962	1.29224e-17	down	AT1G77110.1	Auxin efflux carrier family protein
Potri.005G187600	-2.42503	3.06152e-10	down	AT1G43800.1	Plant stearoyl-acyl-carrier-protein desaturase family protein
Potri.005G190800	5.39156	4.92417e-15	up	AT3G43660.1	Vacuolar iron transporter (VIT) family protein
Potri.005G191100	-1.41766	0.0010275	down	AT2G31290.1	Ubiquitin carboxyl-terminal hydrolase family protein
Potri.005G191900	1.67792	0.00225533	up	AT1G76890.2	Duplicated homeodomain-like superfamily protein
Potri.005G192600	1.85507	2.09128e-25	up	AT1G18740.1	Protein of unknown function (DUF793)
Potri.005G192800	-1.47861	2.19741e-09	down	AT1G21090.1	Cupredoxin superfamily protein
Potri.005G195000	3.70881	0.000118864	up	AT5G64750.1	Integrase-type DNA-binding superfamily protein
Potri.005G195600	1.18414	1.70256e-11	up	AT1G71695.1	Peroxidase superfamily protein
Potri.005G195700	2.63807	3.24549e-22	up	AT1G71695.1	Peroxidase superfamily protein
Potri.005G196100	1.50286	0.000346427	up	AT1G34000.1	one-helix protein 2
Potri.005G197500	1.57613	4.71476e-12	up	AT4G09760.1	Protein kinase superfamily protein
Potri.005G198600	-1.34132	0.00248105	down	AT1G22750.4
Potri.005G201200	6.48031	4.90076e-18	up	AT4G14130.1	xyloglucan endotransglucosylase/hydrolase 15
Potri.005G201300	1.16165	0.00439078	up
Potri.005G202500	-1.54985	1.81295e-08	down	AT1G06320.1
Potri.005G204300	-2.64409	5.15222e-16	down	AT2G30890.1	Cytochrome b561/ferric reductase transmembrane protein family
Potri.005G205700	-2.27534	4.7006e-26	down	AT1G06660.1
Potri.005G206200	1.93682	9.37746e-05	up	AT1G03600.1	photosystem II family protein
Potri.005G207100	1.09046	1.07813e-06	up	AT1G06690.1	NAD(P)-linked oxidoreductase superfamily protein
Potri.005G207200	2.14405	1.5997e-07	up	AT2G43010.2	phytochrome interacting factor 4
Potri.005G209500	2.76757	7.86499e-11	up	AT3G63140.1	chloroplast stem-loop binding protein of 41 kDa
Potri.005G210700	-1.55692	4.09346e-06	down	AT4G02725.1
Potri.005G210800	-2.13718	5.08964e-06	down	AT5G28150.1	Plant protein of unknown function (DUF868)
Potri.005G211000	-1.44286	5.00273e-05	down
Potri.005G214000	-1.58204	7.30209e-20	down	AT1G03070.1	Bax inhibitor-1 family protein
Potri.005G216200	1.458	3.85065e-06	up	AT5G20030.1	Plant Tudor-like RNA-binding protein
Potri.005G216900	-1.38658	0.000160668	down	AT3G22970.1	Protein of unknown function (DUF506)
Potri.005G220600	-1.73368	0.00297188	down	AT2G30690.1	Protein of unknown function, DUF593
Potri.005G221600	-1.049	1.66065e-06	down	AT3G58170.1	BET1P/SFT1P-like protein 14A
Potri.005G224600	-1.63767	0.000222918	down	AT2G20515.1
Potri.005G228000	-4.03267	3.03339e-10	down	AT1G75250.1	RAD-like 6
Potri.005G228100	2.61844	1.77462e-08	up	AT4G36550.1	ARM repeat superfamily protein
Potri.005G228700	2.26906	0.000222918	up	AT1G75280.1	NmrA-like negative transcriptional regulator family protein
Potri.005G232000	3.51165	6.08234e-07	up	AT1G75430.1	BEL1-like homeodomain 11
Potri.005G232400	1.32816	5.28207e-14	up	AT1G19715.3	Mannose-binding lectin superfamily protein
Potri.005G233500	-2.11438	0.00295129	down	AT3G54140.1	peptide transporter 1
Potri.005G235200	1.60022	5.69447e-11	up	AT4G24160.1	alpha/beta-Hydrolases superfamily protein
Potri.005G237700	-1.90657	1.01687e-26	down	AT1G19940.1	glycosyl hydrolase 9B5
Potri.005G237900	-1.99878	1.12571e-29	down	AT5G42560.1	Abscisic acid-responsive (TB2/DP1, HVA22) family protein
Potri.005G238500	-1.03376	0.00449245	down	AT1G75720.2	Plant protein of unknown function (DUF827)
Potri.005G239000	-4.21065	7.72963e-07	down	AT2G18420.1	Gibberellin-regulated family protein
Potri.005G239100	1.07592	1.01492e-09	up	AT1G75750.1	GAST1 protein homolog 1
Potri.005G239200	1.71856	4.9141e-23	up	AT2G34430.1	light-harvesting chlorophyll-protein complex II subunit B1
Potri.005G239300	1.90513	0.000104042	up	AT2G34430.1	light-harvesting chlorophyll-protein complex II subunit B1
Potri.005G239800	2.18448	1.01753e-05	up
Potri.005G239900	-1.70244	1.86493e-13	down	AT1G20010.1	tubulin beta-5 chain
Potri.005G240300	1.30876	0.000155214	up	AT1G30755.1	Protein of unknown function (DUF668)
Potri.005G240900	-2.84692	3.06058e-05	down	AT1G75800.1	Pathogenesis-related thaumatin superfamily protein
Potri.005G241000	-1.265	0.000417836	down	AT4G38660.1	Pathogenesis-related thaumatin superfamily protein
Potri.005G241100	-1.12614	4.0668e-09	down	AT4G24190.2	Chaperone protein htpG family protein
Potri.005G241800	-2.07247	1.26544e-23	down	AT3G21570.1
Potri.005G243000	-1.02447	5.24729e-08	down	AT1G20160.1	Subtilisin-like serine endopeptidase family protein
Potri.005G244500	1.21635	0.000227177	up	AT5G42200.1	RING/U-box superfamily protein
Potri.005G245700	1.08612	7.72989e-06	up	AT1G76080.1	chloroplastic drought-induced stress protein of 32 kD
Potri.005G246100	1.0832	5.75249e-09	up	AT1G76100.1	plastocyanin 1
Potri.005G247700	1.39476	9.62111e-16	up	AT1G76160.1	SKU5 similar 5
Potri.005G248500	1.14364	3.90153e-10	up	AT1G20510.1	OPC-8:0 CoA ligase1
Potri.005G249400	-1.70362	6.52133e-16	down	AT4G35240.1	Protein of unknown function (DUF630 and DUF632)
Potri.005G250600	-2.00769	3.52955e-06	down	AT1G19250.1	flavin-dependent monooxygenase 1
Potri.005G251400	-1.67789	5.29863e-07	down	AT1G76310.1	CYCLIN B2;4
Potri.005G251800	-1.15954	3.29114e-10	down	AT4G38350.1	Patched family protein
Potri.005G254400	-1.16452	0.00168468	down	AT2G33640.1	DHHC-type zinc finger family protein
Potri.005G255200	2.01567	0.000181022	up	AT1G20823.1	RING/U-box superfamily protein
Potri.005G255500	3.29837	5.69204e-08	up	AT1G42550.1	plastid movement impaired1
Potri.005G256000	-2.85422	1.71901e-41	down	AT1G20850.1	xylem cysteine peptidase 2
Potri.005G257800	-1.36316	4.76174e-13	down	AT1G76550.1	Phosphofructokinase family protein
Potri.005G257900	1.62027	2.0676e-11	up	AT1G42990.1	basic region/leucine zipper motif 60
Potri.005G258700	2.03281	2.4978e-31	up	AT1G20980.1	squamosa promoter binding protein-like 14
Potri.005G258900	-1.53404	7.8433e-17	down	AT2G33570.1	Domain of unknown function (DUF23)
Potri.005G259100	2.95882	1.28961e-06	up	AT1G21010.1
Potri.005G259300	1.60432	1.13092e-12	up	AT1G21050.1	Protein of unknown function, DUF617
Potri.005G259600	2.7012	1.38159e-32	up	AT2G33580.1	Protein kinase superfamily protein
Potri.005G259900	1.73191	9.99017e-18	up	AT1G76650.1	calmodulin-like 38
Potri.006G003000	-1.11597	1.15978e-09	down	AT5G47800.1	Phototropic-responsive NPH3 family protein
Potri.006G004100	2.09183	0.00269107	up	AT1G12150.1	Plant protein of unknown function (DUF827)
Potri.006G005500	-5.05694	3.80949e-21	down	AT4G14540.1	nuclear factor Y, subunit B3
Potri.006G005600	-2.09753	4.90336e-05	down	AT5G47635.1	Pollen Ole e 1 allergen and extensin family protein
Potri.006G008500	1.34399	9.18053e-05	up	AT3G22142.1	Bifunctional inhibitor/lipid-transfer protein/seed storage 2S albumin superfamily protein
Potri.006G009500	2.69647	1.10736e-05	up	AT1G12064.1
Potri.006G010500	-1.13587	9.11643e-05	down	AT3G07880.1	Immunoglobulin E-set superfamily protein
Potri.006G011200	2.28943	2.32399e-06	up	AT5G45480.1	Protein of unknown function (DUF594)
Potri.006G013900	1.14967	8.1249e-07	up	AT5G47560.1	tonoplast dicarboxylate transporter
Potri.006G014300	3.56787	4.25776e-12	up	AT1G53430.2	Leucine-rich repeat transmembrane protein kinase
Potri.006G015200	1.03679	0.000449723	up	AT4G16480.1	inositol transporter 4
Potri.006G015300	1.981	2.73277e-16	up	AT4G16480.1	inositol transporter 4
Potri.006G016200	2.75573	2.93561e-39	up	AT4G17230.1	SCARECROW-like 13
Potri.006G016900	-1.10217	1.26193e-08	down	AT2G35760.1	Uncharacterised protein family (UPF0497)
Potri.006G017200	-1.26368	2.185e-05	down	AT4G17240.1
Potri.006G017500	1.73087	0.00205504	up	AT4G16410.1
Potri.006G021200	1.4839	2.40194e-08	up	AT2G32240.1
Potri.006G021600	3.96844	6.74972e-63	up	AT2G32190.1
Potri.006G025200	1.98656	0.00379148	up	AT2G41120.1
Potri.006G026100	1.17934	2.60844e-05	up	AT3G56840.1	FAD-dependent oxidoreductase family protein
Potri.006G032300	2.14375	1.13014e-22	up	AT3G56880.1	VQ motif-containing protein
Potri.006G033300	-1.72146	3.81727e-23	down	AT2G40890.1	cytochrome P450, family 98, subfamily A, polypeptide 3
Potri.006G033500	5.29701	1.06605e-29	up	AT5G07050.1	nodulin MtN21 /EamA-like transporter family protein
Potri.006G033600	-1.37881	0.00250213	down	AT3G56630.1	cytochrome P450, family 94, subfamily D, polypeptide 2
Potri.006G035300	-1.3584	3.35587e-13	down	AT2G40820.1
Potri.006G035400	-2.32604	6.52777e-38	down	AT5G12250.1	beta-6 tubulin
Potri.006G037000	1.0241	0.000160766	up	AT1G73590.1	Auxin efflux carrier family protein
Potri.006G037800	1.57452	0.000273239	up
Potri.006G037900	4.29365	0.00223919	up
Potri.006G039200	-1.47629	7.92536e-15	down	AT1G68060.1	microtubule-associated proteins 70-1
Potri.006G039300	1.21055	1.78413e-05	up	AT3G11340.1	UDP-Glycosyltransferase superfamily protein
Potri.006G040400	-2.09953	1.16317e-28	down	AT3G56750.1
Potri.006G040700	-1.1024	0.00186219	down	AT3G10180.1	P-loop containing nucleoside triphosphate hydrolases superfamily protein
Potri.006G043700	1.94562	5.8052e-29	up	AT3G10190.1	Calcium-binding EF-hand family protein
Potri.006G046900	3.96748	1.61095e-11	up	AT2G41540.1	6-phosphogluconate dehydrogenase family protein
Potri.006G047300	1.88338	9.49733e-05	up	AT3G10300.3	Calcium-binding EF-hand family protein
Potri.006G047400	-1.38059	1.84284e-14	down	AT4G20990.1	alpha carbonic anhydrase 4
Potri.006G048500	1.64432	2.15958e-13	up	AT2G41640.1	Glycosyltransferase family 61 protein
Potri.006G048800	-1.36552	0.0056367	down	AT2G41660.1	Protein of unknown function, DUF617
Potri.006G049700	-1.3232	2.29768e-08	down	AT2G41710.1	Integrase-type DNA-binding superfamily protein
Potri.006G050800	1.93473	2.75771e-06	up	AT3G57450.1
Potri.006G052100	-1.06649	0.000284347	down	AT2G41830.1	Uncharacterized protein
Potri.006G052200	1.07491	1.69125e-05	up	AT2G41835.1	zinc finger (C2H2 type, AN1-like) family protein
Potri.006G052800	1.06316	1.75029e-09	up	AT3G57520.1	seed imbibition 2
Potri.006G053700	-1.62687	7.08191e-19	down	AT2G41890.1	curculin-like (mannose-binding) lectin family protein / PAN domain-containing protein
Potri.006G055900	-1.14954	5.79381e-05	down
Potri.006G056000	-3.27657	5.35601e-12	down
Potri.006G056100	-2.50155	4.25159e-24	down
Potri.006G056600	-2.76063	4.68986e-49	down	AT5G06940.1	Leucine-rich repeat receptor-like protein kinase family protein
Potri.006G057800	-2.5135	8.16725e-08	down	AT2G42260.1	uv-b-insensitive 4
Potri.006G060500	-3.15418	6.68717e-16	down	AT2G12646.1	PLATZ transcription factor family protein
Potri.006G061200	1.34231	0.000939754	up	AT2G25470.1	receptor like protein 21
Potri.006G062200	-2.05575	5.12096e-15	down	AT5G34940.2	glucuronidase 3
Potri.006G062600	1.69122	9.52708e-05	up	AT5G34930.1	arogenate dehydrogenase
Potri.006G062700	2.08384	1.02557e-05	up	AT3G54070.1	Ankyrin repeat family protein
Potri.006G062900	1.86871	4.69593e-09	up	AT3G18670.1	Ankyrin repeat family protein
Potri.006G064000	1.11608	4.65868e-07	up	AT5G33280.1	Voltage-gated chloride channel family protein
Potri.006G064400	-1.24036	0.00753022	down	AT5G20270.1	heptahelical transmembrane protein1
Potri.006G064900	1.42676	0.00619891	up	AT5G20260.1	Exostosin family protein
Potri.006G065900	1.62601	6.96306e-15	up	AT2G43290.1	Calcium-binding EF-hand family protein
Potri.006G067400	1.39399	0.00179658	up	AT5G20230.1	blue-copper-binding protein
Potri.006G067600	5.01624	2.10373e-13	up	AT4G02530.1	chloroplast thylakoid lumen protein
Potri.006G068100	3.02368	3.44639e-13	up	AT1G02630.1	Nucleoside transporter family protein
Potri.006G069600	3.8881	2.05647e-10	up	AT2G41480.1	Peroxidase superfamily protein
Potri.006G070500	-1.22521	2.06493e-07	down	AT3G10700.1	galacturonic acid kinase
Potri.006G072300	-2.58658	0.000529268	down
Potri.006G072800	-1.23284	0.000168683	down	AT4G29890.1	choline monooxygenase, putative (CMO-like)
Potri.006G073000	-1.35785	6.48471e-06	down	AT5G62050.1	homolog of yeast oxidase assembly 1 (OXA1)
Potri.006G074900	1.31967	3.27646e-07	up	AT5G57150.1	basic helix-loop-helix (bHLH) DNA-binding superfamily protein
Potri.006G075200	1.07343	0.00419446	up	AT5G57180.2	chloroplast import apparatus 2
Potri.006G079100	-1.79664	6.44927e-05	down	AT2G07050.1	cycloartenol synthase 1
Potri.006G079200	-1.93101	8.10954e-11	down	AT2G07050.1	cycloartenol synthase 1
Potri.006G079500	-1.67362	1.88103e-07	down	AT2G07170.1	ARM repeat superfamily protein
Potri.006G083200	-2.60705	5.81015e-16	down	AT3G52770.1	protein binding
Potri.006G085200	1.43694	5.53768e-05	up	AT3G09390.1	metallothionein 2A
Potri.006G086900	1.15445	1.64778e-07	up	AT5G02230.1	Haloacid dehalogenase-like hydrolase (HAD) superfamily protein
Potri.006G087100	-3.06852	7.93494e-10	down	AT5G60020.1	laccase 17
Potri.006G087500	-3.198	1.10756e-44	down	AT5G60020.1	laccase 17
Potri.006G087700	2.83571	2.52927e-09	up	AT5G02160.1
Potri.006G092000	2.47253	1.06238e-22	up	AT2G37900.1	Major facilitator superfamily protein
Potri.006G092400	2.47887	6.21764e-12	up	AT5G02020.1
Potri.006G092600	-1.59611	0.000212649	down	AT5G02010.1	RHO guanyl-nucleotide exchange factor 7
Potri.006G093500	-1.52195	5.81813e-17	down	AT1G53540.1	HSP20-like chaperones superfamily protein
Potri.006G093900	-1.39793	1.63506e-14	down	AT3G54030.1	Protein kinase protein with tetratricopeptide repeat domain
Potri.006G094300	-1.53093	1.41705e-05	down	AT3G54040.1	PAR1 protein
Potri.006G094900	-1.11989	6.10162e-08	down	AT5G01090.1	Concanavalin A-like lectin family protein
Potri.006G095000	-1.34487	1.02012e-12	down	AT5G23860.1	tubulin beta 8
Potri.006G096400	-2.30795	1.22608e-10	down	AT3G09080.1	Transducin/WD40 repeat-like superfamily protein
Potri.006G096900	-2.24759	1.079e-10	down	AT2G38080.1	Laccase/Diphenol oxidase family protein
Potri.006G097000	-2.09221	0.00599151	down	AT2G38080.1	Laccase/Diphenol oxidase family protein
Potri.006G097500	4.90524	2.93091e-17	up	AT5G01210.1	HXXXD-type acyl-transferase family protein
Potri.006G097800	5.05123	7.53006e-16	up	AT2G38110.1	glycerol-3-phosphate acyltransferase 6
Potri.006G101400	1.73204	1.12893e-09	up	AT5G01380.1	Homeodomain-like superfamily protein
Potri.006G102500	1.79379	2.20939e-10	up	AT4G33070.1	Thiamine pyrophosphate dependent pyruvate decarboxylase family protein
Potri.006G102600	-2.0019	0.00253601	down	AT5G01310.1	APRATAXIN-like
Potri.006G102800	1.33576	8.36546e-07	up	AT2G38290.1	ammonium transporter 2
Potri.006G103600	2.17664	4.25692e-06	up	AT3G51750.1
Potri.006G103900	4.60066	3.08883e-18	up	AT5G01600.1	ferretin 1
Potri.006G104300	-2.09268	3.63224e-19	down	AT3G51740.1	inflorescence meristem receptor-like kinase 2
Potri.006G105400	1.54918	0.00422218	up	AT5G01720.1	RNI-like superfamily protein
Potri.006G106900	-1.53979	3.00834e-09	down	AT2G40435.1
Potri.006G107100	-1.40389	3.8116e-07	down	AT2G30970.1	aspartate aminotransferase 1
Potri.006G108600	-1.28515	5.00823e-12	down	AT5G01890.1	Leucine-rich receptor-like protein kinase family protein
Potri.006G109900	-1.59665	1.34256e-08	down	AT5G01930.1	Glycosyl hydrolase superfamily protein
Potri.006G110000	1.30168	8.45243e-13	up	AT3G51550.1	Malectin/receptor-like protein kinase family protein
Potri.006G110500	-1.97119	1.82017e-15	down	AT1G14360.1	UDP-galactose transporter 3
Potri.006G112200	1.15663	0.000662151	up	AT5G01990.1	Auxin efflux carrier family protein
Potri.006G112500	3.44091	2.60407e-12	up	AT4G20780.1	calmodulin like 42
Potri.006G112600	2.17438	3.70034e-19	up	AT2G28330.1
Potri.006G113200	-1.38682	3.97091e-07	down	AT2G38620.1	cyclin-dependent kinase B1;2
Potri.006G113800	-2.08989	3.6575e-08	down	AT1G80120.1	Protein of unknown function (DUF567)
Potri.006G114200	1.32556	0.00269347	up	AT3G54220.1	GRAS family transcription factor
Potri.006G114400	-1.36565	1.40152e-14	down	AT1G79620.1	Leucine-rich repeat protein kinase family protein
Potri.006G115700	2.14189	1.60185e-34	up	AT5G03720.1	heat shock transcription factor A3
Potri.006G117200	-1.87154	2.90192e-25	down	AT2G36570.1	Leucine-rich repeat protein kinase family protein
Potri.006G117500	-1.73283	8.12924e-12	down	AT3G10040.1	sequence-specific DNA binding transcription factors
Potri.006G118300	-2.014	0.000961444	down	AT5G03820.1	GDSL-like Lipase/Acylhydrolase family protein
Potri.006G119400	-2.42018	1.56052e-06	down	AT1G32700.1	PLATZ transcription factor family protein
Potri.006G119500	1.86796	4.23231e-06	up	AT5G03555.1	permease, cytosine/purines, uracil, thiamine, allantoin family protein
Potri.006G120400	-1.99992	5.64272e-12	down	AT1G63300.1	Myosin heavy chain-related protein
Potri.006G122000	-1.42742	1.22978e-15	down	AT3G53190.1	Pectin lyase-like superfamily protein
Potri.006G128000	-1.23056	0.00646441	down	AT2G37170.1	plasma membrane intrinsic protein 2
Potri.006G128200	-1.36317	5.37266e-05	down	AT2G37170.1	plasma membrane intrinsic protein 2
Potri.006G128600	-1.51168	3.5622e-18	down	AT5G20890.1	TCP-1/cpn60 chaperonin family protein
Potri.006G128800	1.72961	2.18979e-23	up	AT3G53400.1
Potri.006G129200	-2.22706	5.56505e-33	down	AT5G03170.1	FASCICLIN-like arabinogalactan-protein 11
Potri.006G129700	1.50721	7.83739e-06	up	AT2G39200.1	Seven transmembrane MLO family protein
Potri.006G130300	1.34558	1.12507e-14	up	AT2G37110.1	PLAC8 family protein
Potri.006G131000	-2.31396	2.32242e-18	down	AT2G37090.1	Nucleotide-diphospho-sugar transferases superfamily protein
Potri.006G133800	-7.93033	1.4922e-07	down	AT5G60335.1	Thioesterase superfamily protein
Potri.006G134600	-1.61427	1.99758e-14	down	AT2G26440.1	Plant invertase/pectin methylesterase inhibitor superfamily
Potri.006G135100	1.68719	8.85468e-06	up	AT5G20860.1	Plant invertase/pectin methylesterase inhibitor superfamily
Potri.006G135200	-1.64675	0.00050161	down	AT5G20850.1	RAS associated with diabetes protein 51
Potri.006G136700	-1.11699	5.4243e-10	down	AT3G43190.1	sucrose synthase 4
Potri.006G138500	1.10345	1.90684e-09	up	AT5G20730.2	Transcriptional factor B3 family protein / auxin-responsive factor AUX/IAA-related
Potri.006G138700	3.61503	3.50543e-08	up	AT1G19210.1	Integrase-type DNA-binding superfamily protein
Potri.006G138800	3.77863	1.48138e-20	up	AT1G19210.1	Integrase-type DNA-binding superfamily protein
Potri.006G138900	4.0152	9.54427e-34	up	AT5G21960.1	Integrase-type DNA-binding superfamily protein
Potri.006G139400	2.81444	3.25839e-50	up	AT1G19180.1	jasmonate-zim-domain protein 1
Potri.006G139500	-1.28867	2.10553e-12	down	AT3G42950.1	Pectin lyase-like superfamily protein
Potri.006G140500	1.65615	4.13181e-05	up	AT3G51420.1	strictosidine synthase-like 4
Potri.006G141100	3.69789	3.3572e-13	up	AT5G20635.1
Potri.006G143800	-1.07594	0.00388166	down	AT1G17455.1	ELF4-like 4
Potri.006G147300	1.01745	0.00871412	up	AT5G57030.1	Lycopene beta/epsilon cyclase protein
Potri.006G149700	-1.19083	0.00049395	down	AT4G29460.1	Phospholipase A2 family protein
Potri.006G149900	-2.84959	3.86621e-39	down	AT2G26695.1	Ran BP2/NZF zinc finger-like superfamily protein
Potri.006G150500	1.00006	0.00372882	up	AT4G29590.1	S-adenosyl-L-methionine-dependent methyltransferases superfamily protein
Potri.006G151600	-2.39814	8.33505e-09	down	AT2G19590.1	ACC oxidase 1
Potri.006G152000	-1.07441	2.8321e-08	down	AT5G56890.1	Protein kinase superfamily protein
Potri.006G154700	-2.1667	3.13678e-11	down	AT1G15460.1	HCO3- transporter family
Potri.006G155200	1.5906	1.76489e-15	up	AT2G03500.1	Homeodomain-like superfamily protein
Potri.006G155900	-3.49032	1.70373e-14	down	AT1G69430.1
Potri.006G156900	2.2486	1.92915e-08	up	AT3G24530.1	AAA-type ATPase family protein / ankyrin repeat family protein
Potri.006G158300	-1.39354	0.00235788	down	AT3G24495.1	MUTS homolog 7
Potri.006G158600	2.20183	3.51642e-11	up	AT3G24530.1	AAA-type ATPase family protein / ankyrin repeat family protein
Potri.006G159000	-3.87955	1.26786e-24	down	AT1G69430.1
Potri.006G159200	-1.15959	0.00514508	down	AT3G24495.1	MUTS homolog 7
Potri.006G165500	2.55836	0.0001293	up	AT5G57340.2
Potri.006G166700	2.95279	3.59402e-08	up	AT5G45670.1	GDSL-like Lipase/Acylhydrolase superfamily protein
Potri.006G166800	1.64416	2.55357e-21	up	AT5G45670.1	GDSL-like Lipase/Acylhydrolase superfamily protein
Potri.006G169600	1.58555	0.00545523	up	AT3G21240.1	4-coumarate:CoA ligase 2
Potri.006G173900	-1.52968	4.63251e-10	down	AT5G57685.1	glutamine dumper 3
Potri.006G175500	2.64225	1.02429e-22	up	AT2G18700.1	trehalose phosphatase/synthase 11
Potri.006G177000	-1.22712	0.0019023	down	AT4G30410.1	sequence-specific DNA binding transcription factors
Potri.006G177600	-4.08742	5.31824e-06	down	AT4G30420.1	nodulin MtN21 /EamA-like transporter family protein
Potri.006G178500	1.1171	6.30912e-10	up	AT4G30440.1	UDP-D-glucuronate 4-epimerase 1
Potri.006G180500	1.90221	2.65082e-18	up	AT2G24100.1
Potri.006G181900	-2.50555	5.38496e-45	down	AT5G17420.1	Cellulose synthase family protein
Potri.006G182900	-3.73652	4.56923e-05	down	AT2G24030.1	zinc ion binding;nucleic acid binding
Potri.006G183100	3.82135	0.000341601	up
Potri.006G183800	4.23369	8.4916e-08	up	AT4G31830.1
Potri.006G184100	-1.98146	1.05135e-15	down	AT4G31840.1	early nodulin-like protein 15
Potri.006G186600	1.91523	2.70346e-18	up	AT2G24260.1	LJRHL1-like 1
Potri.006G187900	1.1226	4.70544e-05	up	AT2G24300.2	Calmodulin-binding protein
Potri.006G188000	1.14071	0.00892423	up	AT2G25180.1	response regulator 12
Potri.006G189600	1.4909	0.0023254	up	AT2G46490.1
Potri.006G189900	4.37455	5.41882e-08	up	AT5G35100.1	Cyclophilin-like peptidyl-prolyl cis-trans isomerase family protein
Potri.006G190000	1.547	5.34867e-12	up	AT5G25220.1	KNOTTED1-like homeobox gene 3
Potri.006G192200	1.14227	0.00331119	up	AT2G42130.4	Plastid-lipid associated protein PAP / fibrillin family protein
Potri.006G192700	-1.32143	3.29114e-10	down	AT3G12110.1	actin-11
Potri.006G196400	-2.56174	3.47024e-08	down	AT4G24780.1	Pectin lyase-like superfamily protein
Potri.006G196800	-1.48113	0.00139494	down	AT5G06610.1	Protein of unknown function (DUF620)
Potri.006G198700	-1.11197	0.000799031	down	AT5G06580.1	FAD-linked oxidases family protein
Potri.006G199500	1.2525	1.59761e-12	up	AT5G06530.1	ABC-2 type transporter family protein
Potri.006G200400	-1.87587	1.06983e-11	down	AT2G35880.1	TPX2 (targeting protein for Xklp2) protein family
Potri.006G201300	-1.80897	6.64632e-07	down	AT5G06470.1	Glutaredoxin family protein
Potri.006G202200	2.80119	3.96914e-41	up	AT3G11820.1	syntaxin of plants 121
Potri.006G204300	5.40167	1.93597e-62	up	AT2G35980.1	Late embryogenesis abundant (LEA) hydroxyproline-rich glycoprotein family
Potri.006G207700	-1.13622	5.0224e-05	down	AT5G22300.1	nitrilase 4
Potri.006G209200	4.5599	6.79796e-11	up	AT5G22380.1	NAC domain containing protein 90
Potri.006G210900	1.27142	0.000300064	up	AT3G52610.1
Potri.006G212700	-1.39887	0.00239466	down	AT5G03870.1	Glutaredoxin family protein
Potri.006G212800	1.7012	0.000124171	up	AT3G52710.1
Potri.006G214600	1.32238	4.69593e-09	up	AT1G07710.1	Ankyrin repeat family protein
Potri.006G215000	-2.80535	4.53956e-14	down	AT5G02640.1
Potri.006G217500	-1.10716	0.00959049	down	AT4G33160.1	F-box family protein
Potri.006G217900	-2.48394	2.2272e-20	down	AT5G21280.1	hydroxyproline-rich glycoprotein family protein
Potri.006G218200	3.09683	0.000193222	up	AT1G19210.1	Integrase-type DNA-binding superfamily protein
Potri.006G218800	-1.13748	1.1728e-06	down	AT2G26270.1
Potri.006G219100	5.42293	6.24859e-10	up	AT1G72510.1	Protein of unknown function (DUF1677)
Potri.006G219400	-1.31909	5.84754e-06	down	AT4G33180.1	alpha/beta-Hydrolases superfamily protein
Potri.006G219600	1.03643	6.95457e-05	up	AT2G26310.1	Chalcone-flavanone isomerase family protein
Potri.006G221500	1.48573	5.97323e-08	up	AT5G35550.1	Duplicated homeodomain-like superfamily protein
Potri.006G222200	-1.9332	4.24648e-18	down	AT5G19530.1	S-adenosyl-L-methionine-dependent methyltransferases superfamily protein
Potri.006G222800	2.72126	3.98124e-52	up	AT2G01490.1	phytanoyl-CoA dioxygenase (PhyH) family protein
Potri.006G223900	-1.50706	1.19583e-12	down	AT5G12020.1	17.6 kDa class II heat shock protein
Potri.006G225900	-1.25595	2.82273e-10	down	AT5G11970.1	Protein of unknown function (DUF3511)
Potri.006G226400	2.17138	2.53458e-11	up	AT4G33050.3	calmodulin-binding family protein
Potri.006G226500	3.30021	3.76223e-30	up	AT4G33050.3	calmodulin-binding family protein
Potri.006G226600	-1.96109	1.51311e-10	down	AT2G26180.1	IQ-domain 6
Potri.006G228400	1.29493	9.70399e-05	up	AT1G68400.1	leucine-rich repeat transmembrane protein kinase family protein
Potri.006G232100	1.06515	4.07157e-08	up	AT5G26030.1	ferrochelatase 1
Potri.006G234900	2.96063	0.00025221	up	AT2G25890.1	Oleosin family protein
Potri.006G235000	-1.04271	2.36129e-05	down	AT4G32830.1	ataurora1
Potri.006G235500	2.30776	0.000310349	up	AT5G25930.1	Protein kinase family protein with leucine-rich repeat domain
Potri.006G235800	3.08388	3.05412e-06	up	AT5G25930.1	Protein kinase family protein with leucine-rich repeat domain
Potri.006G236500	1.06296	5.20684e-05	up	AT5G25880.1	NADP-malic enzyme 3
Potri.006G236700	-1.26921	1.61611e-05	down	AT4G29110.1
Potri.006G237500	-1.13275	4.71853e-05	down	AT4G32880.1	homeobox gene 8
Potri.006G239800	-2.41639	0.000892278	down	AT1G67280.1	Glyoxalase/Bleomycin resistance protein/Dioxygenase superfamily protein
Potri.006G241700	-1.0143	2.80808e-05	down	AT5G11510.1	myb domain protein 3r-4
Potri.006G243400	1.48417	0.000742149	up	AT5G25620.1	Flavin-binding monooxygenase family protein
Potri.006G243600	3.85825	9.84211e-06	up	AT5G25610.1	BURP domain-containing protein
Potri.006G244300	-2.10383	1.09343e-29	down	AT4G32690.1	hemoglobin 3
Potri.006G245200	-1.46676	9.94056e-12	down	AT5G11460.1	Protein of unknown function (DUF581)
Potri.006G245900	1.29165	0.00601455	up	AT2G25680.1	molybdate transporter 1
Potri.006G247600	-1.34176	0.00269914	down
Potri.006G249900	-1.50083	3.18523e-13	down	AT2G25600.1	Shaker pollen inward K+ channel
Potri.006G250100	2.16956	0.00199352	up	AT5G11420.1	Protein of unknown function, DUF642
Potri.006G252200	1.63728	0.00686133	up	AT2G18660.1	plant natriuretic peptide A
Potri.006G254200	1.7205	3.53596e-15	up	AT1G30380.1	photosystem I subunit K
Potri.006G258300	1.11287	1.06965e-08	up	AT2G25290.1	Octicosapeptide/Phox/Bem1p (PB1) domain-containing protein / tetratricopeptide repeat (TPR)-containing protein
Potri.006G259200	2.87546	2.82455e-23	up	AT5G11070.1
Potri.006G260000	1.16035	3.79609e-09	up	AT4G32020.1
Potri.006G261300	1.24931	4.2137e-05	up	AT5G11000.1	Plant protein of unknown function (DUF868)
Potri.006G261500	-1.17509	0.000311532	down	AT5G25170.1	PPPDE putative thiol peptidase family protein
Potri.006G261700	-1.53431	0.00205684	down	AT5G10970.1	C2H2 and C2HC zinc fingers superfamily protein
Potri.006G262700	-1.03352	4.69593e-09	down	AT2G25140.1	casein lytic proteinase B4
Potri.006G263000	-1.23583	2.50015e-09	down	AT2G37585.1	Core-2/I-branching beta-1,6-N-acetylglucosaminyltransferase family protein
Potri.006G263600	5.42523	1.93545e-07	up	AT4G31800.2	WRKY DNA-binding protein 18
Potri.006G264300	-2.00575	4.22138e-10	down	AT4G31820.1	Phototropic-responsive NPH3 family protein
Potri.006G264600	-1.95934	1.39837e-18	down	AT2G25060.1	early nodulin-like protein 14
Potri.006G266400	1.21764	0.00329916	up	AT4G32140.1	EamA-like transporter family
Potri.006G267300	1.01134	0.000865381	up	AT2G24820.1	translocon at the inner envelope membrane of chloroplasts 55-II
Potri.006G267900	1.61729	2.43261e-06	up	AT5G57685.1	glutamine dumper 3
Potri.006G271700	3.07465	1.37307e-11	up
Potri.006G275000	1.4001	9.7421e-16	up	AT2G24520.1	H(+)-ATPase 5
Potri.006G275800	1.10775	0.00461668	up	AT3G14470.1	NB-ARC domain-containing disease resistance protein
Potri.006G276200	-1.73135	6.26625e-05	down	AT3G12660.1	FASCICLIN-like arabinogalactan protein 14 precursor
Potri.006G278100	-3.11317	1.91616e-05	down	AT2G24400.1	SAUR-like auxin-responsive protein family
Potri.007G001200	1.06887	0.000601978	up	AT3G19990.1
Potri.007G003100	1.10091	0.000609601	up	AT3G13050.1	Major facilitator superfamily protein
Potri.007G003200	2.33037	8.74187e-14	up	AT3G13040.1	myb-like HTH transcriptional regulator family protein
Potri.007G003800	6.01283	1.47408e-10	up	AT1G32910.1	HXXXD-type acyl-transferase family protein
Potri.007G005700	3.91364	1.6359e-18	up	AT1G70210.1	CYCLIN D1;1
Potri.007G008200	1.35385	6.59742e-10	up	AT4G37790.1	Homeobox-leucine zipper protein family
Potri.007G008500	2.92325	0.000480712	up	AT5G65730.1	xyloglucan endotransglucosylase/hydrolase 6
Potri.007G011500	2.42978	0.000389026	up	AT5G65500.1	U-box domain-containing protein kinase family protein
Potri.007G011600	-1.9768	1.88702e-08	down	AT5G10510.2	AINTEGUMENTA-like 6
Potri.007G013600	1.64859	2.36167e-08	up	AT1G19860.1	Zinc finger C-x8-C-x5-C-x3-H type family protein
Potri.007G013800	1.0426	0.00590575	up	AT2G36430.1	Plant protein of unknown function (DUF247)
Potri.007G013900	1.27668	3.42041e-12	up	AT3G51160.1	NAD(P)-binding Rossmann-fold superfamily protein
Potri.007G014800	-2.03378	1.40415e-19	down	AT3G51150.2	ATP binding microtubule motor family protein
Potri.007G016400	-2.30764	1.5116e-26	down	AT4G36220.1	ferulic acid 5-hydroxylase 1
Potri.007G016800	-2.01343	2.34243e-05	down	AT5G66330.1	Leucine-rich repeat (LRR) family protein
Potri.007G017000	1.30536	0.00769106	up	AT3G54340.1	K-box region and MADS-box transcription factor family protein
Potri.007G018100	-1.66093	1.34849e-20	down	AT4G36360.1	beta-galactosidase 3
Potri.007G019600	3.33797	6.97276e-69	up	AT1G43910.1	P-loop containing nucleoside triphosphate hydrolases superfamily protein
Potri.007G020800	2.03506	1.11328e-16	up	AT5G17760.1	P-loop containing nucleoside triphosphate hydrolases superfamily protein
Potri.007G021300	2.87497	5.47942e-05	up	AT3G11480.1	S-adenosyl-L-methionine-dependent methyltransferases superfamily protein
Potri.007G021400	-1.31208	1.22282e-05	down	AT4G36470.1	S-adenosyl-L-methionine-dependent methyltransferases superfamily protein
Potri.007G024400	2.39553	2.83069e-06	up	AT2G18360.1	alpha/beta-Hydrolases superfamily protein
Potri.007G028000	-1.84572	1.82535e-06	down	AT2G18500.1	ovate family protein 7
Potri.007G031200	1.32463	4.36038e-06	up	AT2G18630.1	Protein of unknown function (DUF677)
Potri.007G031600	1.29335	1.24705e-05	up	AT2G23780.1	RING/U-box superfamily protein
Potri.007G031700	-1.86716	4.30242e-18	down	AT3G50760.1	galacturonosyltransferase-like 2
Potri.007G031800	2.62554	0.000101445	up	AT4G36850.1	PQ-loop repeat family protein / transmembrane family protein
Potri.007G032100	1.62104	0.00343097	up	AT2G23770.1	protein kinase family protein / peptidoglycan-binding LysM domain-containing protein
Potri.007G032700	-1.49192	1.102e-05	down	AT2G23760.1	BEL1-like homeodomain 4
Potri.007G033400	2.24882	4.83093e-11	up	AT2G23690.1
Potri.007G033600	-1.32018	0.00182465	down	AT4G37235.1	Uncharacterised protein family (UPF0497)
Potri.007G034500	1.80679	1.05352e-16	up	AT2G23450.1	Protein kinase superfamily protein
Potri.007G034700	-2.14808	0.00014187	down
Potri.007G036300	5.49287	3.74616e-08	up	AT2G23540.1	GDSL-like Lipase/Acylhydrolase superfamily protein
Potri.007G036700	3.10817	2.87379e-11	up	AT2G23610.1	methyl esterase 3
Potri.007G038300	-1.31811	1.30144e-08	down	AT5G66920.1	SKU5 similar 17
Potri.007G038800	1.49659	0.00682793	up
Potri.007G039000	2.54921	1.39803e-32	up	AT5G66900.1	Disease resistance protein (CC-NBS-LRR class) family
Potri.007G039300	1.79445	1.41426e-06	up	AT5G66900.1	Disease resistance protein (CC-NBS-LRR class) family
Potri.007G039400	1.01257	3.69027e-06	up	AT4G37180.1	Homeodomain-like superfamily protein
Potri.007G040300	2.66375	1.95634e-05	up	AT2G26560.1	phospholipase A 2A
Potri.007G042900	1.1349	5.14993e-10	up	AT2G15680.1	Calcium-binding EF-hand family protein
Potri.007G044300	1.19646	3.40845e-09	up	AT5G67030.1	zeaxanthin epoxidase (ZEP) (ABA1)
Potri.007G044700	-1.06978	4.96242e-06	down	AT5G67070.1	ralf-like 34
Potri.007G044800	5.73977	8.47208e-12	up	AT5G67080.1	mitogen-activated protein kinase kinase kinase 19
Potri.007G045200	-1.49195	6.43111e-09	down	AT4G36945.1	PLC-like phosphodiesterases superfamily protein
Potri.007G045500	-3.06792	2.27733e-05	down	AT4G34040.1	RING/U-box superfamily protein
Potri.007G046100	-1.07894	0.00547197	down	AT2G23360.1	Plant protein of unknown function (DUF869)
Potri.007G047000	-2.69986	9.80118e-31	down	AT5G67210.1	Protein of unknown function (DUF579)
Potri.007G047200	1.2623	2.55295e-12	up	AT2G28680.1	RmlC-like cupins superfamily protein
Potri.007G047500	-1.84711	3.19452e-24	down	AT5G67230.1	Nucleotide-diphospho-sugar transferases superfamily protein
Potri.007G048200	2.67126	7.12069e-39	up	AT5G67250.1	SKP1/ASK1-interacting protein 2
Potri.007G048900	1.82473	2.60471e-23	up	AT4G37260.1	myb domain protein 73
Potri.007G052000	1.2188	6.71897e-09	up	AT4G37470.1	alpha/beta-Hydrolases superfamily protein
Potri.007G052600	-2.29995	7.28746e-35	down	AT4G33910.1	2-oxoglutarate (2OG) and Fe(II)-dependent oxygenase superfamily protein
Potri.007G053200	1.30909	2.20759e-07	up	AT5G67385.1	Phototropic-responsive NPH3 family protein
Potri.007G053300	4.1791	2.51702e-11	up	AT5G67390.1
Potri.007G053400	2.72387	0.000231866	up	AT5G67400.1	root hair specific 19
Potri.007G053600	1.71238	1.12014e-11	up	AT3G49940.1	LOB domain-containing protein 38
Potri.007G055400	-1.95467	2.85422e-12	down	AT1G64960.1	ARM repeat superfamily protein
Potri.007G055500	5.08154	9.22707e-123	up	AT4G37640.1	calcium ATPase 2
Potri.007G056500	-1.12605	0.00354572	down	AT3G51280.1	Tetratricopeptide repeat (TPR)-like superfamily protein
Potri.007G056700	-1.1616	0.000199176	down	AT3G51290.2	Protein of unknown function (DUF630) ;Protein of unknown function (DUF632)
Potri.007G057200	1.3035	2.95942e-07	up	AT5G66190.1	ferredoxin-NADP(+)-oxidoreductase 1
Potri.007G059800	-1.88032	2.27841e-16	down	AT4G35730.1	Regulator of Vps4 activity in the MVB pathway protein
Potri.007G062700	1.10848	1.92502e-07	up	AT2G17220.1	Protein kinase superfamily protein
Potri.007G070600	1.08136	0.000330157	up	AT3G18620.1	DHHC-type zinc finger family protein
Potri.007G071300	1.98451	6.96256e-09	up	AT5G23120.1	photosystem II stability/assembly factor, chloroplast (HCF136)
Potri.007G072100	4.45712	4.01605e-17	up	AT5G23190.1	cytochrome P450, family 86, subfamily B, polypeptide 1
Potri.007G072300	-1.3145	9.72507e-08	down	AT5G08260.1	serine carboxypeptidase-like 35
Potri.007G073800	-4.96346	4.11949e-12	down	AT3G19940.1	Major facilitator superfamily protein
Potri.007G075000	4.63774	1.44166e-09	up	AT3G26300.1	cytochrome P450, family 71, subfamily B, polypeptide 34
Potri.007G075200	1.10819	0.0069886	up	AT5G08350.1	GRAM domain-containing protein / ABA-responsive protein-related
Potri.007G076500	1.03147	4.93229e-09	up	AT5G64740.1	cellulose synthase 6
Potri.007G078200	-1.21932	2.2153e-06	down	AT4G39410.1	WRKY DNA-binding protein 13
Potri.007G078600	2.23183	0.00129757	up	AT4G39420.2
Potri.007G080800	2.48689	1.07158e-13	up	AT5G09960.1
Potri.007G082900	2.63153	1.01575e-06	up	AT3G26300.1	cytochrome P450, family 71, subfamily B, polypeptide 34
Potri.007G083000	3.105	8.03627e-09	up	AT3G26330.1	cytochrome P450, family 71, subfamily B, polypeptide 37
Potri.007G083400	4.02263	3.26821e-81	up	AT4G38400.1	expansin-like A2
Potri.007G083500	3.58329	5.15695e-09	up	AT3G26300.1	cytochrome P450, family 71, subfamily B, polypeptide 34
Potri.007G083600	3.5613	9.3176e-05	up	AT3G26300.1	cytochrome P450, family 71, subfamily B, polypeptide 34
Potri.007G083900	4.08856	2.2302e-21	up	AT3G26330.1	cytochrome P450, family 71, subfamily B, polypeptide 37
Potri.007G086000	-1.06672	0.00544047	down	AT5G65207.1
Potri.007G088300	4.75673	1.32409e-25	up	AT4G39830.1	Cupredoxin superfamily protein
Potri.007G088400	2.10406	8.78678e-06	up	AT2G22250.2	aspartate aminotransferase
Potri.007G089000	2.96261	1.08593e-49	up	AT2G22240.1	myo-inositol-1-phosphate synthase 2
Potri.007G089100	-2.2131	0.00024318	down
Potri.007G089200	-2.2589	7.88466e-22	down	AT1G78020.1	Protein of unknown function (DUF581)
Potri.007G090900	1.8262	2.25708e-07	up	AT5G65140.1	Haloacid dehalogenase-like hydrolase (HAD) superfamily protein
Potri.007G091000	1.95925	3.67157e-10	up	AT2G22170.1	Lipase/lipooxygenase, PLAT/LH2 family protein
Potri.007G091200	-1.36745	4.55994e-05	down	AT5G65160.1	tetratricopeptide repeat (TPR)-containing protein
Potri.007G091900	2.48317	7.9839e-37	up	AT4G39840.1
Potri.007G092300	3.0129	0.000256015	up	AT5G65030.1
Potri.007G096500	1.83606	1.45613e-21	up	AT5G65280.1	GCR2-like 1
Potri.007G097000	2.98892	5.21739e-06	up	AT3G06868.1
Potri.007G097600	-2.50162	9.96214e-12	down	AT1G72210.1	basic helix-loop-helix (bHLH) DNA-binding superfamily protein
Potri.007G097900	2.0905	9.71758e-22	up	AT5G63770.1	diacylglycerol kinase 2
Potri.007G098500	-1.25933	1.55113e-05	down	AT3G05270.1	Plant protein of unknown function (DUF869)
Potri.007G098600	3.8941	5.81603e-08	up	AT5G64440.1	fatty acid amide hydrolase
Potri.007G098800	2.20852	8.68095e-11	up	AT3G14880.2
Potri.007G099400	2.7353	1.93909e-12	up	AT1G01720.1	NAC (No Apical Meristem) domain transcriptional regulator superfamily protein
Potri.007G100100	2.31016	1.03213e-10	up	AT5G09220.1	amino acid permease 2
Potri.007G100600	1.80077	1.71275e-06	up	AT3G52430.1	alpha/beta-Hydrolases superfamily protein
Potri.007G102300	1.6814	0.00304558	up	AT2G04160.1	Subtilisin-like serine endopeptidase family protein
Potri.007G102800	-1.49451	1.14498e-05	down	AT5G63950.1	chromatin remodeling 24
Potri.007G103600	-2.87612	2.08259e-05	down
Potri.007G105700	1.26125	3.20864e-12	up	AT5G44860.1
Potri.007G105900	1.1164	0.000133476	up	AT5G64040.2	photosystem I reaction center subunit PSI-N, chloroplast, putative / PSI-N, putative (PSAN)
Potri.007G106100	-3.40115	8.6722e-07	down	AT4G33450.1	myb domain protein 69
Potri.007G107200	-3.00549	0.00377068	down	AT3G18660.2	plant glycogenin-like starch initiation protein 1
Potri.007G108400	-2.04724	2.63102e-07	down	AT1G77120.1	alcohol dehydrogenase 1
Potri.007G109200	4.35355	5.10535e-17	up	AT4G33467.2
Potri.007G110700	-1.81168	1.23474e-05	down	AT3G18715.1	inflorescence deficient in abscission (IDA)-like 4
Potri.007G114400	4.44872	5.89033e-10	up	AT5G09530.1	hydroxyproline-rich glycoprotein family protein
Potri.007G115500	3.70437	1.11997e-08	up	AT4G37370.1	cytochrome P450, family 81, subfamily D, polypeptide 8
Potri.007G120100	-1.80548	1.22745e-12	down	AT3G22070.1	proline-rich family protein
Potri.007G120200	-3.07598	3.01561e-10	down	AT2G32300.1	uclacyanin 1
Potri.007G121500	-1.48647	4.24857e-07	down	AT3G21870.1	cyclin p2;1
Potri.007G123400	1.1673	2.15952e-07	up	AT5G40390.1	Raffinose synthase family protein
Potri.007G124300	-1.73639	0.000394091	down	AT1G58210.1	kinase interacting family protein
Potri.007G126700	1.28467	9.73686e-08	up	AT1G05870.1	Protein of unknown function (DUF1685)
Potri.007G127000	4.06937	7.41174e-06	up	AT2G31500.1	calcium-dependent protein kinase 24
Potri.007G128200	1.40771	0.00217149	up	AT3G59400.1	enzyme binding;tetrapyrrole binding
Potri.007G130400	1.09342	0.00538411	up	AT1G06050.1	Protein of unknown function (DUF1336)
Potri.007G132000	1.26291	1.07815e-10	up	AT4G37650.1	GRAS family transcription factor
Potri.007G134000	2.29667	1.28505e-09	up	AT4G04885.1	PCF11P-similar protein 4
Potri.007G135300	-1.22005	0.00502042	down	AT4G28500.1	NAC domain containing protein 73
Potri.007G135400	2.21979	2.51608e-32	up	AT1G28440.1	HAESA-like 1
Potri.007G137700	-1.11454	0.000587325	down	AT2G20590.1	Reticulon family protein
Potri.007G138100	2.49341	2.62691e-41	up	AT5G44210.1	erf domain protein 9
Potri.007G138200	1.37877	0.00936145	up	AT5G44240.2	aminophospholipid ATPase 2
Potri.007G138300	-4.07759	1.88968e-11	down	AT1G03790.1	Zinc finger C-x8-C-x5-C-x3-H type family protein
Potri.007G138800	-1.89059	1.86515e-05	down	AT1G53160.1	squamosa promoter binding protein-like 4
Potri.007G139000	-1.48398	0.000487192	down	AT2G20635.1	ATP binding;protein kinases;protein serine/threonine kinases
Potri.007G142100	4.96249	3.4233e-28	up	AT2G43850.1	Integrin-linked protein kinase family
Potri.007G143800	1.00778	1.32126e-06	up	AT1G26320.1	Zinc-binding dehydrogenase family protein
Potri.007G146400	1.57859	1.29111e-10	up	AT3G59900.1	auxin-regulated gene involved in organ size
Potri.008G000500	1.39049	0.00221558	up	AT3G59410.2	protein kinase family protein
Potri.008G001000	1.60056	0.00899655	up	AT1G73970.1
Potri.008G002900	3.80527	4.31388e-42	up	AT4G37930.1	serine transhydroxymethyltransferase 1
Potri.008G006000	-1.0151	2.18862e-06	down	AT1G16860.1	Ubiquitin-specific protease family C19-related protein
Potri.008G006500	-2.54311	1.00008e-37	down	AT1G71070.1	Core-2/I-branching beta-1,6-N-acetylglucosaminyltransferase family protein
Potri.008G009300	2.11224	2.70733e-10	up	AT1G73080.1	PEP1 receptor 1
Potri.008G010100	-1.78601	0.00275032	down	AT2G28690.1	Protein of unknown function (DUF1635)
Potri.008G012400	-1.81476	3.85762e-17	down	AT5G06390.1	FASCICLIN-like arabinogalactan protein 17 precursor
Potri.008G015700	1.07619	0.000893895	up	AT3G11760.1
Potri.008G020300	-1.468	0.00250061	down	AT3G18650.1	AGAMOUS-like 103
Potri.008G020800	1.67577	0.00622526	up	AT3G10080.1	RmlC-like cupins superfamily protein
Potri.008G020900	-1.5757	1.2275e-17	down	AT3G54260.1	TRICHOME BIREFRINGENCE-LIKE 36
Potri.008G021200	3.54617	3.42672e-08	up	AT2G36290.1	alpha/beta-Hydrolases superfamily protein
Potri.008G023900	-1.43365	9.63534e-05	down	AT3G52870.1	IQ calmodulin-binding motif family protein
Potri.008G024000	-2.23962	8.60469e-05	down	AT3G44610.1	Protein kinase superfamily protein
Potri.008G024100	1.35065	0.000125717	up	AT5G22510.1	alkaline/neutral invertase
Potri.008G025500	-4.1953	3.07608e-15	down	AT5G04660.1	cytochrome P450, family 77, subfamily A, polypeptide 4
Potri.008G026400	-2.78805	1.34724e-22	down	AT5G03760.1	Nucleotide-diphospho-sugar transferases superfamily protein
Potri.008G026600	1.13511	0.00422222	up	AT1G08230.2	Transmembrane amino acid transporter family protein
Potri.008G026800	1.11405	2.03676e-09	up	AT5G04550.1	Protein of unknown function (DUF668)
Potri.008G027600	3.08367	0.00349085	up	AT1G59970.1	Matrixin family protein
Potri.008G030200	-2.25701	4.20452e-09	down	AT3G52790.1	peptidoglycan-binding LysM domain-containing protein
Potri.008G031700	1.39437	3.99255e-13	up	AT5G58330.2	lactate/malate dehydrogenase family protein
Potri.008G032500	-1.65678	2.54469e-12	down	AT5G22930.1	Protein of unknown function (DUF1635)
Potri.008G032600	-1.18243	1.89207e-06	down	AT5G04320.2	Shugoshin C terminus
Potri.008G033200	-1.2138	2.27605e-05	down	AT2G36840.1	ACT-like superfamily protein
Potri.008G036900	2.10123	1.00487e-05	up	AT5G04250.1	Cysteine proteinases superfamily protein
Potri.008G037700	-2.24624	1.95674e-24	down	AT2G39020.1	Acyl-CoA N-acyltransferases (NAT) superfamily protein
Potri.008G038300	1.42455	7.62745e-05	up	AT5G04220.2	Calcium-dependent lipid-binding (CaLB domain) family protein
Potri.008G038800	-2.39618	6.36895e-20	down	AT3G54800.1	Pleckstrin homology (PH) and lipid-binding START domains-containing protein
Potri.008G039500	-1.07849	7.59642e-08	down	AT5G13570.1	decapping 2
Potri.008G040000	-1.16824	5.72108e-07	down	AT5G19290.1	alpha/beta-Hydrolases superfamily protein
Potri.008G040100	1.42923	5.06323e-08	up	AT3G54960.1	PDI-like 1-3
Potri.008G044500	-1.59415	0.00162302	down	AT2G38890.2
Potri.008G045500	4.79072	1.02453e-21	up
Potri.008G047600	1.14906	1.15818e-09	up	AT5G13590.1
Potri.008G050700	3.26985	1.12504e-45	up	AT4G01470.1	tonoplast intrinsic protein 1;3
Potri.008G053500	1.54922	0.000840068	up	AT3G55390.1	Uncharacterised protein family (UPF0497)
Potri.008G054000	-1.29253	3.23053e-11	down	AT5G02500.1	heat shock cognate protein 70-1
Potri.008G054400	-1.42916	2.72646e-05	down	AT5G59350.1
Potri.008G054900	1.66002	7.4603e-05	up	AT3G12580.1	heat shock protein 70
Potri.008G055100	1.37142	2.90366e-12	up	AT3G55370.2	OBF-binding protein 3
Potri.008G055800	-1.62925	9.91994e-08	down	AT3G55420.1
Potri.008G055900	2.24699	6.7537e-29	up	AT3G55430.1	O-Glycosyl hydrolases family 17 protein
Potri.008G057100	-1.10547	2.6887e-08	down	AT2G39700.1	expansin A4
Potri.008G057500	-1.46096	1.41112e-10	down	AT5G13840.1	FIZZY-related 3
Potri.008G057800	-1.22806	0.00202529	down	AT2G39705.1	ROTUNDIFOLIA like 8
Potri.008G058500	1.71441	1.75354e-12	up	AT2G39730.1	rubisco activase
Potri.008G058700	1.74847	1.5791e-07	up	AT3G55560.1	AT-hook protein of GA feedback 2
Potri.008G060100	-1.41708	8.46726e-15	down	AT2G39770.1	Glucose-1-phosphate adenylyltransferase family protein
Potri.008G060200	-1.23624	0.00090484	down	AT3G55610.1	delta 1-pyrroline-5-carboxylate synthase 2
Potri.008G061000	-1.20559	8.47573e-05	down	AT5G02030.1	POX (plant homeobox) family protein
Potri.008G061600	3.34023	3.2166e-22	up
Potri.008G061800	3.6988	3.51642e-11	up	AT5G05960.1	Bifunctional inhibitor/lipid-transfer protein/seed storage 2S albumin superfamily protein
Potri.008G062200	-1.53682	8.06655e-06	down	AT2G39870.1
Potri.008G062300	-1.63372	1.45587e-11	down	AT1G53540.1	HSP20-like chaperones superfamily protein
Potri.008G063000	-1.24313	0.00901934	down	AT2G37975.1	Yos1-like protein
Potri.008G063400	1.34926	4.37663e-09	up	AT3G11320.1	Nucleotide-sugar transporter family protein
Potri.008G063800	4.54365	2.11149e-40	up	AT3G55800.1	sedoheptulose-bisphosphatase
Potri.008G066700	-1.03436	4.37591e-08	down	AT5G05710.1	Pleckstrin homology (PH) domain superfamily protein
Potri.008G067300	1.06955	4.46569e-05	up	AT2G40100.1	light harvesting complex photosystem II
Potri.008G067500	1.54842	7.26832e-05	up	AT5G05690.1	Cytochrome P450 superfamily protein
Potri.008G069000	-1.09647	1.04403e-08	down	AT2G40120.1	Protein kinase superfamily protein
Potri.008G069100	-1.00388	8.40883e-08	down	AT2G40130.2	Double Clp-N motif-containing P-loop nucleoside triphosphate hydrolases superfamily protein
Potri.008G069600	1.13062	0.000702777	up	AT5G05580.1	fatty acid desaturase 8
Potri.008G069900	-2.51539	8.19892e-38	down	AT3G55990.1	Plant protein of unknown function (DUF828)
Potri.008G071200	-3.32045	2.0784e-19	down	AT2G40230.1	HXXXD-type acyl-transferase family protein
Potri.008G072900	-1.50355	0.00139954	down	AT5G05460.1	Glycosyl hydrolase family 85
Potri.008G073300	-1.93193	8.24713e-22	down	AT2G40320.1	TRICHOME BIREFRINGENCE-LIKE 33
Potri.008G073700	-2.46517	1.22399e-37	down	AT2G40370.1	laccase 5
Potri.008G073800	-1.14824	7.38438e-10	down	AT5G05390.1	laccase 12
Potri.008G075200	-1.27125	5.06014e-12	down	AT3G10985.1	senescence associated gene 20
Potri.008G075800	-1.63147	0.00222213	down	AT5G36170.1	high chlorophyll fluorescent 109
Potri.008G076800	-1.36966	1.18271e-09	down	AT3G59470.1	Far-red impaired responsive (FAR1) family protein
Potri.008G078000	-1.90435	5.52803e-24	down	AT5G16250.1
Potri.008G078300	5.41876	1.34057e-07	up
Potri.008G078800	1.27048	0.00796876	up	AT5G16290.1	VALINE-TOLERANT 1
Potri.008G080100	1.02138	0.00013539	up	AT3G12670.1	CTP synthase family protein
Potri.008G081300	-1.19689	0.00108391	down	AT1G79380.1	Ca(2)-dependent phospholipid-binding protein (Copine) family
Potri.008G084500	1.21724	1.65639e-06	up	AT3G12780.1	phosphoglycerate kinase 1
Potri.008G084800	-1.06198	3.32948e-09	down	AT3G19820.1	cell elongation protein / DWARF1 / DIMINUTO (DIM)
Potri.008G085000	2.64393	6.91662e-37	up	AT3G19830.1	Calcium-dependent lipid-binding (CaLB domain) family protein
Potri.008G085100	2.27229	0.00242696	up	AT3G19840.1	pre-mRNA-processing protein 40C
Potri.008G086700	1.10802	0.00367177	up	AT2G02990.1	ribonuclease 1
Potri.008G086800	-3.96474	3.74374e-06	down	AT1G26820.1	ribonuclease 3
Potri.008G088300	-1.75412	1.11392e-16	down	AT1G69530.1	expansin A1
Potri.008G089500	-1.27464	0.00010312	down	AT1G26760.1	SET domain protein 35
Potri.008G093800	-2.0547	0.00261953	down	AT1G13890.1	soluble N-ethylmaleimide-sensitive factor adaptor protein 30
Potri.008G094300	-1.81639	6.9537e-11	down	AT3G29360.1	UDP-glucose 6-dehydrogenase family protein
Potri.008G094700	-1.88497	1.65233e-16	down	AT3G27960.1	Tetratricopeptide repeat (TPR)-like superfamily protein
Potri.008G095000	-1.61137	1.79728e-06	down	AT1G26480.1	general regulatory factor 12
Potri.008G097900	1.00531	0.000560412	up	AT1G69170.1	Squamosa promoter-binding protein-like (SBP domain) transcription factor family protein
Potri.008G098200	-1.68942	3.68718e-08	down	AT1G69160.1
Potri.008G099400	-2.17291	4.25274e-12	down	AT3G15580.1	Ubiquitin-like superfamily protein
Potri.008G099800	-1.15104	0.000882966	down	AT3G17350.1
Potri.008G100000	-1.11522	1.2698e-07	down	AT1G10630.1	ADP-ribosylation factor A1F
Potri.008G100500	-2.43163	2.15686e-32	down	AT1G48100.1	Pectin lyase-like superfamily protein
Potri.008G100700	1.04537	0.00108934	up	AT1G48040.1	Protein phosphatase 2C family protein
Potri.008G101700	-1.06654	0.000135429	down
Potri.008G102000	4.43104	1.42644e-06	up	AT1G47980.1
Potri.008G102600	-2.18488	2.74105e-15	down	AT3G17130.1	Plant invertase/pectin methylesterase inhibitor superfamily protein
Potri.008G103300	2.5369	6.2895e-07	up	AT5G49520.1	WRKY DNA-binding protein 48
Potri.008G108400	6.59157	1.47564e-14	up	AT5G49350.1	Glycine-rich protein family
Potri.008G108600	-1.07519	3.24665e-05	down	AT5G26910.1
Potri.008G111200	1.50329	2.68235e-17	up	AT1G68710.1	ATPase E1-E2 type family protein / haloacid dehalogenase-like hydrolase family protein
Potri.008G112300	-2.32719	1.89911e-05	down	AT1G13635.1	DNA glycosylase superfamily protein
Potri.008G116200	-1.33235	0.00361067	down
Potri.008G116900	-1.01332	8.22129e-07	down	AT1G13250.1	galacturonosyltransferase-like 3
Potri.008G117100	2.07987	6.25948e-31	up	AT1G25560.1	AP2/B3 transcription factor family protein
Potri.008G119600	1.54138	4.57341e-16	up	AT4G39670.1	Glycolipid transfer protein (GLTP) family protein
Potri.008G120000	-1.3789	6.4459e-10	down	AT1G68560.1	alpha-xylosidase 1
Potri.008G122300	-1.25498	2.09149e-09	down	AT1G68330.1
Potri.008G125700	1.30176	0.000324574	up	AT1G15100.1	RING-H2 finger A2A
Potri.008G126500	1.36604	3.32753e-05	up	AT1G15170.1	MATE efflux family protein
Potri.008G127200	3.72488	1.66303e-15	up	AT3G03280.1
Potri.008G127600	2.8651	5.01792e-44	up	AT2G01290.1	ribose-5-phosphate isomerase 2
Potri.008G127800	3.06464	2.34628e-25	up	AT2G01300.1
Potri.008G130400	1.90794	8.55511e-26	up	AT1G23090.1	sulfate transporter 91
Potri.008G130500	-1.79492	5.63059e-24	down	AT1G23100.1	GroES-like family protein
Potri.008G130700	1.12582	0.00648807	up	AT1G23110.1
Potri.008G131600	1.2992	0.00317279	up	AT1G70780.1
Potri.008G132600	-1.46023	4.25016e-13	down	AT1G14890.1	Plant invertase/pectin methylesterase inhibitor superfamily protein
Potri.008G132700	-2.00653	3.61429e-29	down	AT1G70710.1	glycosyl hydrolase 9B1
Potri.008G133400	1.16862	1.72924e-09	up	AT3G17860.1	jasmonate-zim-domain protein 3
Potri.008G133800	1.33184	0.00169626	up	AT1G70670.1	Caleosin-related family protein
Potri.008G136600	1.28557	3.37321e-09	up	AT1G67980.1	caffeoyl-CoA 3-O-methyltransferase
Potri.008G137800	-1.04108	0.000769663	down	AT1G66150.1	transmembrane kinase 1
Potri.008G138000	1.24658	0.000225618	up	AT1G66140.1	zinc finger protein 4
Potri.008G138300	-2.22919	1.40043e-07	down	AT1G14730.1	Cytochrome b561/ferric reductase transmembrane protein family
Potri.008G139200	-2.55436	0.000937063	down	AT1G03280.1	Transcription factor TFIIE, alpha subunit
Potri.008G141100	1.07135	0.00317313	up	AT2G02010.1	glutamate decarboxylase 4
Potri.008G142400	1.71227	1.78909e-06	up	AT2G02070.1	indeterminate(ID)-domain 5
Potri.008G144500	2.98083	4.40215e-62	up	AT1G14520.2	myo-inositol oxygenase 1
Potri.008G144800	-1.48413	1.70962e-08	down	AT3G11920.1	glutaredoxin-related
Potri.008G145700	1.20678	1.57051e-08	up	AT5G55380.1	MBOAT (membrane bound O-acyl transferase) family protein
Potri.008G148000	1.81912	7.32427e-24	up	AT2G02800.1	protein kinase 2B
Potri.008G148200	2.60573	6.63268e-06	up	AT1G69780.1	Homeobox-leucine zipper protein family
Potri.008G149500	-1.45161	0.00169453	down	AT3G06030.1	NPK1-related protein kinase 3
Potri.008G151000	-1.26486	7.14002e-07	down	AT5G26330.1	Cupredoxin superfamily protein
Potri.008G151800	-1.21037	5.37036e-10	down	AT5G19530.1	S-adenosyl-L-methionine-dependent methyltransferases superfamily protein
Potri.008G151900	2.00253	2.09885e-05	up	AT1G31710.1	Copper amine oxidase family protein
Potri.008G152100	-2.39835	0.000909509	down	AT1G05370.1	Sec14p-like phosphatidylinositol transfer family protein
Potri.008G152200	-3.15196	7.47447e-05	down	AT5G43150.1
Potri.008G154500	1.47691	3.42408e-06	up	AT3G22540.1	Protein of unknown function (DUF1677)
Potri.008G157600	-1.05442	3.22218e-05	down	AT3G22830.1	heat shock transcription factor A6B
Potri.008G158200	2.05305	0.000684733	up	AT3G22840.1	Chlorophyll A-B binding family protein
Potri.008G158800	-1.23372	2.85564e-12	down	AT5G43810.1	Stabilizer of iron transporter SufD / Polynucleotidyl transferase
Potri.008G159800	-1.88191	1.03837e-26	down	AT3G22970.1	Protein of unknown function (DUF506)
Potri.008G160000	4.94304	4.43285e-15	up	AT2G26640.1	3-ketoacyl-CoA synthase 11
Potri.008G162800	-1.05075	8.69111e-06	down	AT3G23090.1	TPX2 (targeting protein for Xklp2) protein family
Potri.008G166700	2.65393	0.000154394	up	AT3G23250.1	myb domain protein 15
Potri.008G167200	1.12864	0.000461659	up	AT4G14380.1
Potri.008G169300	1.35776	2.57573e-06	up	AT3G23410.1	fatty alcohol oxidase 3
Potri.008G169400	3.19844	1.80728e-05	up	AT3G23430.1	phosphate 1
Potri.008G170100	2.11513	2.23927e-05	up	AT5G46050.1	peptide transporter 3
Potri.008G170300	1.40554	2.72001e-06	up	AT3G23510.1	Cyclopropane-fatty-acyl-phospholipid synthase
Potri.008G170600	-1.97235	1.72321e-05	down	AT2G33400.1
Potri.008G170800	-2.37936	9.51298e-14	down	AT2G33385.2	actin-related protein C2B
Potri.008G171000	2.37193	1.6007e-07	up	AT2G05620.1	proton gradient regulation 5
Potri.008G172000	4.25457	8.20229e-10	up	AT4G21865.1
Potri.008G172400	-1.47543	1.21941e-15	down	AT2G33310.1	auxin-induced protein 13
Potri.008G172500	-2.64597	4.1181e-13	down	AT4G13430.1	isopropyl malate isomerase large subunit 1
Potri.008G174100	2.06539	9.3193e-24	up	AT3G23920.1	beta-amylase 1
Potri.008G175300	-1.61717	6.2895e-07	down	AT1G67400.1	ELMO/CED-12 family protein
Potri.008G176100	1.50769	0.00222907	up	AT1G24310.1
Potri.008G176900	-1.36037	1.49642e-11	down	AT1G67510.1	Leucine-rich repeat protein kinase family protein
Potri.008G179600	-1.89589	1.35847e-11	down	AT3G25980.1	DNA-binding HORMA family protein
Potri.008G181700	-2.00521	5.674e-05	down	AT1G67730.1	beta-ketoacyl reductase 1
Potri.008G182200	-1.7182	3.38029e-06	down	AT1G67750.1	Pectate lyase family protein
Potri.008G183000	-1.30767	0.00133772	down	AT3G26120.1	terminal EAR1-like 1
Potri.008G184900	1.01474	0.00846109	up	AT3G26320.1	cytochrome P450, family 71, subfamily B, polypeptide 36
Potri.008G185500	-2.73446	6.77413e-06	down	AT3G26430.1	GDSL-like Lipase/Acylhydrolase superfamily protein
Potri.008G192000	2.33361	3.0938e-33	up	AT1G27200.1	Domain of unknown function (DUF23)
Potri.008G192300	-1.87945	1.84576e-12	down	AT1G70340.1	Plant protein of unknown function (DUF936)
Potri.008G192600	3.21931	4.22424e-48	up	AT1G70090.1	glucosyl transferase family 8
Potri.008G194000	1.27349	3.81876e-07	up	AT1G10350.1	DNAJ heat shock family protein
Potri.008G194100	1.87719	9.31597e-12	up	AT1G69880.1	thioredoxin H-type 8
Potri.008G195000	-1.01974	0.00024186	down	AT3G06035.1	Glycoprotein membrane precursor GPI-anchored
Potri.008G196800	1.48122	0.00161945	up	AT1G17710.1	Pyridoxal phosphate phosphatase-related protein
Potri.008G197300	1.34808	0.00202156	up	AT5G18850.1
Potri.008G197800	1.65903	0.00015363	up	AT5G18910.1	Protein kinase superfamily protein
Potri.008G198000	1.84114	9.78106e-25	up	AT4G02040.1
Potri.008G201600	-1.55962	2.7394e-17	down	AT3G23590.1	REF4-related 1
Potri.008G202200	1.15254	1.12818e-05	up	AT5G19040.1	isopentenyltransferase 5
Potri.008G202800	-1.03902	1.4373e-08	down	AT5G19090.2	Heavy metal transport/detoxification superfamily protein
Potri.008G203100	-1.26975	6.70659e-07	down	AT1G03220.1	Eukaryotic aspartyl protease family protein
Potri.008G208200	-1.90271	0.000316652	down	AT4G15800.1	ralf-like 33
Potri.008G213200	1.30875	6.38535e-05	up	AT1G52590.1	Putative thiol-disulphide oxidoreductase DCC
Potri.008G213500	1.86401	2.92617e-17	up	AT4G16110.1	response regulator 2
Potri.008G214500	3.06401	8.13933e-06	up	AT3G21460.1	Glutaredoxin family protein
Potri.008G219200	2.89814	1.64589e-30	up	AT3G16720.1	TOXICOS EN LEVADURA 2
Potri.008G220000	4.52423	2.73193e-05	up	ATMG00665.1	NADH dehydrogenase 5B
Potri.008G220800	2.35093	6.23945e-05	up	AT3G06880.2	Transducin/WD40 repeat-like superfamily protein
Potri.008G224900	1.2274	1.18315e-05	up	AT4G02510.1	translocon at the outer envelope membrane of chloroplasts 159
Potri.008G225500	-2.39709	7.58646e-05	down	AT4G15830.1	ARM repeat superfamily protein
Potri.008G225800	-1.43582	0.00528499	down	AT4G15830.1	ARM repeat superfamily protein
Potri.008G226600	1.91312	2.3423e-05	up	AT3G06890.1
Potri.009G002200	4.25418	2.34221e-53	up	AT5G22860.1	Serine carboxypeptidase S28 family protein
Potri.009G005400	1.71364	1.62789e-10	up	AT2G36830.1	gamma tonoplast intrinsic protein
Potri.009G005700	2.01542	3.41369e-29	up	AT5G22920.1	CHY-type/CTCHY-type/RING-type Zinc finger protein
Potri.009G005800	-1.38461	0.00011539	down	AT2G28150.1	Domain of unknown function (DUF966)
Potri.009G006100	-1.23893	0.00812473	down	AT5G04320.2	Shugoshin C terminus
Potri.009G006500	-1.01862	1.1402e-07	down	AT2G28110.1	Exostosin family protein
Potri.009G006600	-2.69594	4.06917e-05	down	AT2G36870.1	xyloglucan endotransglucosylase/hydrolase 32
Potri.009G007600	1.08053	0.00294342	up	AT5G60800.2	Heavy metal transport/detoxification superfamily protein
Potri.009G009500	-1.36529	1.44085e-07	down	AT5G60720.1	Protein of unknown function, DUF547
Potri.009G010400	-1.56692	6.96666e-07	down	AT2G28250.1	Protein kinase superfamily protein
Potri.009G010800	-1.53049	1.03703e-09	down	AT2G28305.1	Putative lysine decarboxylase family protein
Potri.009G011100	-1.74871	9.87801e-22	down	AT2G28315.1	Nucleotide/sugar transporter family protein
Potri.009G012200	-2.71434	0.00217825	down	AT5G60490.1	FASCICLIN-like arabinogalactan-protein 12
Potri.009G013500	-1.90445	8.68888e-07	down	AT3G45230.1	hydroxyproline-rich glycoprotein family protein
Potri.009G013800	-1.50555	0.0001078	down	AT2G28410.1
Potri.009G013900	-1.05984	3.41531e-07	down	AT5G60660.1	plasma membrane intrinsic protein 2;4
Potri.009G018500	-2.10163	5.06091e-07	down	AT3G56850.1	ABA-responsive element binding protein 3
Potri.009G019200	1.30661	0.00156648	up	AT3G44350.2	NAC domain containing protein 61
Potri.009G019600	-2.95412	1.90809e-15	down	AT3G44220.1	Late embryogenesis abundant (LEA) hydroxyproline-rich glycoprotein family
Potri.009G020000	2.74861	6.35019e-12	up	AT3G52460.1	hydroxyproline-rich glycoprotein family protein
Potri.009G022500	2.9691	6.52219e-15	up	AT2G44500.1	O-fucosyltransferase family protein
Potri.009G023600	-1.72229	2.40176e-05	down	AT5G06710.1	homeobox from Arabidopsis thaliana
Potri.009G024300	6.81174	2.60895e-10	up	AT2G31945.1
Potri.009G024800	-1.86428	2.30618e-06	down	AT2G31920.1	Plant protein of unknown function (DUF936)
Potri.009G025200	4.80537	4.3215e-20	up	AT2G18370.1	Bifunctional inhibitor/lipid-transfer protein/seed storage 2S albumin superfamily protein
Potri.009G027100	-2.52452	0.00133714	down	AT2G28690.1	Protein of unknown function (DUF1635)
Potri.009G028700	1.08493	3.5804e-07	up	AT3G46450.1	SEC14 cytosolic factor family protein / phosphoglyceride transfer family protein
Potri.009G029000	-2.13496	1.46509e-05	down	AT5G59305.1
Potri.009G030700	-1.31826	6.83198e-05	down	AT5G02390.1	Protein of unknown function (DUF3741)
Potri.009G030800	2.05181	1.29003e-22	up	AT3G09390.1	metallothionein 2A
Potri.009G031800	-2.08707	1.18458e-08	down	AT2G39700.1	expansin A4
Potri.009G033300	2.48397	5.7004e-41	up	AT1G07530.1	SCARECROW-like 14
Potri.009G034700	-1.10505	8.97391e-10	down	AT3G55530.1	RING/U-box superfamily protein
Potri.009G036100	-1.36596	0.00956598	down	AT3G53810.1	Concanavalin A-like lectin protein kinase family protein
Potri.009G039200	-1.47855	0.00291505	down	AT1G07400.1	HSP20-like chaperones superfamily protein
Potri.009G039500	-1.32291	1.88275e-06	down	AT5G59010.1	Protein kinase protein with tetratricopeptide repeat domain
Potri.009G041100	1.09928	0.00746451	up	AT4G37300.1	maternal effect embryo arrest 59
Potri.009G042400	1.95196	1.26312e-09	up	AT3G54140.1	peptide transporter 1
Potri.009G043700	5.24925	4.12701e-11	up	AT5G58860.1	cytochrome P450, family 86, subfamily A, polypeptide 1
Potri.009G044200	1.1999	0.00223069	up	AT2G29670.1	Tetratricopeptide repeat (TPR)-like superfamily protein
Potri.009G044600	1.0309	2.67132e-05	up	AT2G29730.1	UDP-glucosyl transferase 71D1
Potri.009G045800	1.00344	0.00291412	up	AT2G38170.3	cation exchanger 1
Potri.009G046200	1.53197	1.45547e-05	up	AT5G58730.1	pfkB-like carbohydrate kinase family protein
Potri.009G046300	1.16331	1.14137e-10	up	AT5G58720.1	smr (Small MutS Related) domain-containing protein
Potri.009G047100	1.40329	0.00356737	up	AT2G29990.1	alternative NAD(P)H dehydrogenase 2
Potri.009G047700	1.02788	5.11619e-05	up	AT2G13360.1	alanine:glyoxylate aminotransferase
Potri.009G048300	5.30735	0.00295288	up	AT3G07600.1	Heavy metal transport/detoxification superfamily protein
Potri.009G048400	4.47195	2.93415e-09	up	AT3G07600.1	Heavy metal transport/detoxification superfamily protein
Potri.009G049600	-2.03978	6.23478e-19	down	AT3G20060.1	ubiquitin-conjugating enzyme19
Potri.009G049800	-2.41548	1.18751e-36	down	AT1G07400.1	HSP20-like chaperones superfamily protein
Potri.009G049900	-3.4838	1.23208e-05	down	AT1G07400.1	HSP20-like chaperones superfamily protein
Potri.009G052400	1.9913	1.65634e-05	up	AT1G51405.1	myosin-related
Potri.009G053700	1.31192	7.39913e-14	up	AT1G51340.2	MATE efflux family protein
Potri.009G053800	1.86696	5.83424e-23	up	AT5G12860.1	dicarboxylate transporter 1
Potri.009G053900	-1.795	0.00019606	down	AT5G12870.1	myb domain protein 46
Potri.009G055800	1.17173	0.00959287	up	AT1G01550.1	Protein of unknown function (DUF793)
Potri.009G055900	-1.34085	2.92058e-05	down	AT3G63470.1	serine carboxypeptidase-like 40
Potri.009G057800	1.33296	8.83046e-05	up	AT5G19440.1	NAD(P)-binding Rossmann-fold superfamily protein
Potri.009G058800	-1.16749	0.00564227	down	AT3G08030.1	Protein of unknown function, DUF642
Potri.009G059200	-1.08161	1.46571e-09	down	AT3G21640.1	FKBP-type peptidyl-prolyl cis-trans isomerase family protein
Potri.009G059600	2.32883	5.99762e-05	up	AT3G08010.1	RNA binding
Potri.009G061300	-1.92999	1.54502e-22	down	AT3G08490.1
Potri.009G064300	-1.79579	5.20425e-25	down	AT3G20820.1	Leucine-rich repeat (LRR) family protein
Potri.009G065000	-1.77809	0.00957449	down	AT3G20940.1	cytochrome P450, family 705, subfamily A, polypeptide 30
Potri.009G066100	3.46702	1.77259e-55	up	AT3G45640.1	mitogen-activated protein kinase 3
Potri.009G067100	-1.39104	3.14978e-15	down	AT5G12250.1	beta-6 tubulin
Potri.009G067200	-1.01988	3.28592e-08	down	AT5G12250.1	beta-6 tubulin
Potri.009G069100	6.92599	1.79154e-14	up	AT5G07990.1	Cytochrome P450 superfamily protein
Potri.009G070200	5.29405	5.63494e-07	up
Potri.009G073000	2.77167	6.57383e-29	up	AT2G30020.1	Protein phosphatase 2C family protein
Potri.009G073200	2.42532	3.02413e-10	up	AT1G07150.1	mitogen-activated protein kinase kinase kinase 13
Potri.009G074100	1.06013	3.1835e-05	up	AT2G30080.1	ZIP metal ion transporter family
Potri.009G075400	-2.16283	1.66989e-21	down	AT5G45840.2	Leucine-rich repeat protein kinase family protein
Potri.009G075600	-1.07497	0.00440753	down	AT5G58530.1	Glutaredoxin family protein
Potri.009G075900	-1.20131	0.000126719	down	AT5G58520.1	Protein kinase superfamily protein
Potri.009G076100	1.41336	1.7692e-05	up	AT1G07090.1	Protein of unknown function (DUF640)
Potri.009G076500	-1.02305	0.00208491	down	AT5G58480.1	O-Glycosyl hydrolases family 17 protein
Potri.009G080600	2.43948	6.52716e-13	up	AT1G58290.1	Glutamyl-tRNA reductase family protein
Potri.009G081500	-1.18525	1.43655e-11	down	AT5G64510.1
Potri.009G082300	1.2131	8.19362e-06	up	AT2G14520.1	CBS domain-containing protein with a domain of unknown function (DUF21)
Potri.009G084000	1.54287	2.60094e-17	up	AT1G10020.1	Protein of unknown function (DUF1005)
Potri.009G084400	-1.63002	3.20042e-09	down	AT2G16270.1
Potri.009G086100	1.81796	0.00302973	up	AT5G14930.2	senescence-associated gene 101
Potri.009G086800	1.18092	0.000332257	up	AT1G49960.1	Xanthine/uracil permease family protein
Potri.009G087200	-2.96142	1.05132e-49	down	AT1G10200.1	GATA type zinc finger transcription factor family protein
Potri.009G089200	-1.16376	5.01984e-05	down	AT3G19590.1	Transducin/WD40 repeat-like superfamily protein
Potri.009G089400	6.59952	2.47393e-23	up	AT1G27730.1	salt tolerance zinc finger
Potri.009G089800	-1.82068	9.55296e-16	down	AT1G49890.1	Family of unknown function (DUF566)
Potri.009G090700	1.35701	8.60912e-11	up	AT3G43740.1	Leucine-rich repeat (LRR) family protein
Potri.009G091100	3.05611	3.43885e-09	up	AT3G19550.1
Potri.009G091200	1.19431	9.24236e-09	up	AT1G49850.1	RING/U-box superfamily protein
Potri.009G092300	-1.6551	2.39906e-20	down	AT4G37450.1	arabinogalactan protein 18
Potri.009G092400	-1.1846	0.00291696	down	AT3G19540.1	Protein of unknown function (DUF620)
Potri.009G095400	1.00336	0.00414105	up	AT4G15480.1	UDP-Glycosyltransferase superfamily protein
Potri.009G097100	1.65496	1.41422e-16	up	AT2G15320.1	Leucine-rich repeat (LRR) family protein
Potri.009G098500	1.10852	2.24783e-07	up
Potri.009G099800	-1.62178	4.14594e-19	down	AT4G34050.1	S-adenosyl-L-methionine-dependent methyltransferases superfamily protein
Potri.009G101400	2.68088	1.03908e-07	up	AT5G42900.1	cold regulated gene 27
Potri.009G101900	6.05347	1.57917e-46	up	AT4G34410.1	redox responsive transcription factor 1
Potri.009G102700	-5.76824	4.96489e-15	down	AT5G03260.1	laccase 11
Potri.009G103200	-1.05866	0.00957658	down	AT3G19184.1	AP2/B3-like transcriptional factor family protein
Potri.009G104400	2.53402	2.92319e-17	up	AT2G03550.1	alpha/beta-Hydrolases superfamily protein
Potri.009G104600	1.98968	9.26683e-12	up	AT1G19190.1	alpha/beta-Hydrolases superfamily protein
Potri.009G104900	1.56851	0.000284347	up	AT1G47480.1	alpha/beta-Hydrolases superfamily protein
Potri.009G106100	-1.33837	0.00558829	down	AT4G33945.1	ARM repeat superfamily protein
Potri.009G108900	3.91445	2.69998e-11	up	AT1G49470.1	Family of unknown function (DUF716)
Potri.009G109300	-1.62105	0.00591404	down	AT2G15960.1
Potri.009G109400	1.70297	8.34954e-07	up	AT2G23460.1	extra-large G-protein 1
Potri.009G111400	1.73655	0.000713518	up	AT3G18890.1	NAD(P)-binding Rossmann-fold superfamily protein
Potri.009G112400	3.65443	1.34398e-10	up	AT4G34320.1	Protein of unknown function (DUF677)
[truncated: 1,502 more rows]

## Sheet: Table S2
Table S2. PagGRF15 ChIP-seq binding loci and target genes.
	Peak start	Peak end	Peak name	Score	Focus Ratio/Region Size	Strand	Annotation	Nearest gene	Distance of peak's middle to TSS	Anti Tag Count in given bp (2356528.0 Total, normalization factor = 1, effective total = 10000000)	input Tag Count in given bp (7726893.0 Total, normalization factor = 1, effective total = 10000000)	Enrichment	GO ID	AT accession	Annotation
Chr10	18056902	18056958	Chr10-45	38794.4	0.995	+	TTS (ID=Potri.010G183100.1.v3.0.exon.2;Parent=Potri.010G183100.1.v3.0;pacid=26982882)	Potri.010G183100	1062	9142	1	9142	GO:0004190,GO:0006508	AT1G49050.1	Eukaryotic aspartyl protease family protein
Chr01	33534511	33534567	Chr01-117	3798	0.953	+	TTS (ID=Potri.001G331700.1.v3.0.exon.5;Parent=Potri.001G331700.1.v3.0;pacid=27048473)	Potri.001G331700	809	1441.5	2	720.75	GO:0016747	AT5G17540.1	HXXXD-type acyl-transferase family protein
Chr02	4024089	4024145	Chr02-41	1629.5	0.649	+	promoter-TSS (ID=Potri.002G059300.3.v3.0.exon.6;Parent=Potri.002G059300.3.v3.0;pacid=27023217)	Potri.002G059300	-342	339.5	0.5	679		AT5G16300.1	Vps51/Vps67 family (components of vesicular transport) protein
Chr10	13176203	13176259	Chr10-104	666.2	0.847	+	Intergenic	Potri.010G113400	1704	302.5	0.5	605	GO:0019867	AT3G44160.1	Outer membrane OMP85 family protein
Chr05	10452428	10452484	Chr05-28	1268.8	0.703	+	promoter-TSS (ID=Potri.005G130000.1.v3.0.exon.7;Parent=Potri.005G130000.1.v3.0;pacid=27029322)	Potri.005G130000	-17	294	0.5	588	GO:0003676,GO:0008270,GO:0005634,GO:0003723	AT1G10320.1	Zinc finger C-x8-C-x5-C-x3-H type family protein
Chr04	23353749	23353805	Chr04-8	1264.6	0.626	+	TTS (ID=Potri.004G228600.3.v3.0.exon.5;Parent=Potri.004G228600.3.v3.0;pacid=26992188)	Potri.004G228600	157	294	0.5	588		AT5G48655.1	RING/U-box superfamily protein
Chr01	5666847	5666903	Chr01-60	1311.3	0.68	+	Intergenic	Potri.001G070900	-4724	289	0.5	578	GO:0051082,GO:0006457	AT2G20560.1	DNAJ heat shock family protein
Chr03	8266201	8266257	Chr03-2	10759.5	0.972	+	Intergenic	Potri.003G055900	-2473	2530.5	4.5	562.333
Chr12	2073474	2073530	Chr12-36	1154.2	0.787	+	Intergenic	Potri.012G023600	3944	267	0.5	534		AT3G49410.1	Transcription factor IIIC, subunit 5
Chr19	7734684	7734740	Chr19-5	1088.5	0.645	+	Intergenic	Potri.019G051300	-20620	254.5	0.5	509	GO:0003676,GO:0016788	AT5G07350.2	TUDOR-SN protein 1
Chr06	2224987	2225043	Chr06-19	3320.6	0.798	+	Intergenic	Potri.006G033200	-2408	1250	2.5	500
Chr14	9130504	9130560	Chr14-32	1065.1	0.645	+	Intergenic	Potri.014G117400	-2724	242.5	0.5	485		AT5G51830.1	pfkB-like carbohydrate kinase family protein
Chr10	12272041	12272097	Chr10-13	1005.7	0.739	+	promoter-TSS (ID=Potri.010G101400.1.v3.0.exon.1;Parent=Potri.010G101400.1.v3.0;pacid=26979870)	Potri.010G101400	-908	231	0.5	462	GO:0005515	AT4G12560.1	F-box and associated interaction domains-containing protein
Chr17	4267691	4267747	Chr17-18	942.1	0.776	+	TTS (ID=Potri.017G051000.1.v3.0.exon.9;Parent=Potri.017G051000.1.v3.0;pacid=26985630)	Potri.017G051000	1393	219.5	0.5	439	GO:0004672,GO:0005524,GO:0006468,GO:0005515	AT2G26330.1	Leucine-rich receptor-like protein kinase family protein
Chr02	7316756	7316812	Chr02-19	925.1	0.767	+	Intergenic	Potri.002G101300	4166	209.5	0.5	419		AT4G24660.1	homeobox protein 22
Chr17	2665401	2665457	Chr17-6	1678.3	0.755	+	TTS (ID=Potri.017G030900.2.v3.0.exon.10;Parent=Potri.017G030900.2.v3.0;pacid=26983565)	Potri.017G030900	550	391.5	1	391.5		AT3G21480.1	BRCT domain-containing DNA repair protein
Chr06	12817116	12817172	Chr06-25	844.5	0.728	+	Intergenic	Potri.006G148700	21161	192.5	0.5	385	GO:0008270,GO:0005622	AT2G26695.1	Ran BP2/NZF zinc finger-like superfamily protein
Chr08	11244380	11244436	Chr08-24	4816.4	0.929	+	promoter-TSS (ID=Potri.008G165000.1.v3.0.exon.18;Parent=Potri.008G165000.1.v3.0;pacid=27039692)	Potri.008G165000	194	1150.5	3	383.5		AT1G65620.1	Lateral organ boundaries (LOB) domain family protein
Chr14	17300226	17300282	Chr14-24	4190.5	0.91	+	Intergenic	Potri.014G189800	-5279	1337.5	3.5	382.143		AT1G15800.1
Chr04	3671568	3671624	Chr04-28	825.4	0.63	+	Intergenic	Potri.004G047700	-4504	189.5	0.5	379	GO:0005507,GO:0009055	AT1G08500.1	early nodulin-like protein 18
Chr08	13946361	13946417	Chr08-20	806.3	0.805	+	Intergenic	Potri.008G198900	-9854	189.5	0.5	379	GO:0005515	AT3G59940.1	Galactose oxidase/kelch repeat superfamily protein
Chr15	14551674	14551730	Chr15-7	1538.3	0.889	+	Intergenic	Potri.015G135600	3355	366	1	366	GO:0005515,GO:0044183	AT5G19330.1	ARM repeat protein interacting with ABF2
Chr13	3252352	3252408	Chr13-14	780.8	0.69	+	Intergenic	Potri.013G045500	9110	182.5	0.5	365
Chr05	21400637	21400693	Chr05-40	738.4	0.795	+	Intergenic	Potri.005G197900	-2843	173.5	0.5	347	GO:0003676,GO:0005524,GO:0008026,GO:0004386	AT1G20920.1	P-loop containing nucleoside triphosphate hydrolases superfamily protein
Chr10	3626131	3626187	Chr10-48	719.3	0.69	+	Intergenic	Potri.010G025800	-13976	167	0.5	334
Chr01	15059392	15059448	Chr01-172	606.8	0.792	+	Intergenic	Potri.001G176500	5915	167	0.5	334		AT4G03115.1	Mitochondrial substrate carrier family protein
Chr16	2314834	2314890	Chr16-19	2896.2	0.766	+	TTS (ID=Potri.016G037900.2.v3.0.exon.2;Parent=Potri.016G037900.2.v3.0;pacid=27013296)	Potri.016G037900	1548	813.5	2.5	325.4	GO:0016020	AT1G34270.1	Exostosin family protein
Chr14	13020736	13020792	Chr14-13	691.7	0.673	+	Intergenic	Potri.014G164700	-6165	159.5	0.5	319	GO:0008270	AT4G36860.1	LIM domain-containing protein
Chr13	8140091	8140147	Chr13-37	672.6	0.625	+	Intergenic	Potri.013G086100	-29927	157	0.5	314
Chr04	19520354	19520410	Chr04-25	666.2	0.692	+	promoter-TSS (ID=Potri.004G177100.1.v3.0.exon.1;Parent=Potri.004G177100.1.v3.0;pacid=26990861)	Potri.004G177100	-999	155.5	0.5	311	GO:0008146	AT3G50620.1	P-loop containing nucleoside triphosphate hydrolases superfamily protein
Chr16	1773879	1773935	Chr16-16	681.1	0.778	+	Intergenic	Potri.016G031400	-5069	154.5	0.5	309	GO:0003677,GO:0006355
Chr02	2742298	2742354	Chr02-55	679	0.627	+	TTS (ID=Potri.002G042900.1.v3.0.exon.1;Parent=Potri.002G042900.1.v3.0;pacid=27024345)	Potri.002G042900	633	154	0.5	308		AT1G16810.1
Chr01	4726884	4726940	Chr01-47	664.1	0.75	+	TTS (ID=Potri.001G061300.1.v3.0.exon.1;Parent=Potri.001G061300.1.v3.0;pacid=27045485)	Potri.001G061300	395	154	0.5	308	GO:0004252,GO:0006508,GO:0042802,GO:0043086	AT4G34980.1	subtilisin-like serine protease 2
Chr13	147435	147491	Chr13-21	670.5	0.799	+	promoter-TSS (ID=Potri.013G001800.1.v3.0.exon.1;Parent=Potri.013G001800.1.v3.0;pacid=26993369)	Potri.013G001800	-145	151.5	0.5	303		AT2G26790.1	Pentatricopeptide repeat (PPR) superfamily protein
Chr12	2184524	2184580	Chr12-26	1298.5	0.629	+	Intergenic	Potri.012G025600	2040	302.5	1	302.5	GO:0005515	AT5G42010.1	Transducin/WD40 repeat-like superfamily protein
Chr17	2688621	2688677	Chr17-7	1347.3	0.721	+	TTS (ID=Potri.017G031100.1.v3.0.exon.6;Parent=Potri.017G031100.1.v3.0;pacid=26985023)	Potri.017G031100	538	296.5	1	296.5	GO:0005198	AT4G00170.1	Plant VAMP (vesicle-associated membrane protein) family protein
Chr05	7820618	7820674	Chr05-73	659.9	0.672	+	Intergenic	Potri.005G102100	-2610	144.5	0.5	289		AT1G17620.1	Late embryogenesis abundant (LEA) hydroxyproline-rich glycoprotein family
Chr11	8112387	8112443	Chr11-27	611.1	0.62	+	TTS (ID=Potri.011G081200.4.v3.0.exon.7;Parent=Potri.011G081200.4.v3.0;pacid=27001122)	Potri.011G081200	320	144	0.5	288		AT3G53940.1	Mitochondrial substrate carrier family protein
Chr08	15700276	15700332	Chr08-36	608.9	0.749	+	promoter-TSS (ID=Potri.008G207900.1.v3.0.exon.1;Parent=Potri.008G207900.1.v3.0;pacid=27039429)	Potri.008G207900	-756	142	0.5	284	GO:0016491,GO:0016706,GO:0055114	AT1G52800.1	2-oxoglutarate (2OG) and Fe(II)-dependent oxygenase superfamily protein
Chr18	15011181	15011237	Chr18-27	617.4	0.712	+	TTS (ID=Potri.018G127900.3.v3.0.exon.1;Parent=Potri.018G127900.3.v3.0;pacid=27009470)	Potri.018G127900	1371	141.5	0.5	283		AT1G05577.1	Domain of unknown function (DUF966)
Chr07	1822684	1822740	Chr07-23	632.3	0.705	+	Intergenic	Potri.007G024100	-7082	137	0.5	274		AT2G27040.1	Argonaute family protein
Chr01	33193810	33193866	Chr01-27	2815.6	0.646	+	Intergenic	Potri.001G327800	-3563	667.5	2.5	267		AT2G14110.1	Haloacid dehalogenase-like hydrolase (HAD) superfamily protein
Chr04	20552758	20552814	Chr04-48	615.3	0.655	+	promoter-TSS (ID=Potri.004G190900.1.v3.0.exon.12;Parent=Potri.004G190900.1.v3.0;pacid=26991241)	Potri.004G190900	-143	133	0.5	266		AT5G19260.1	Protein of unknown function (DUF3049)
Chr03	9149710	9149766	Chr03-34	572.9	0.758	+	Intergenic	Potri.003G063200	-8411	131.5	0.5	263
Chr05	17251137	17251193	Chr05-79	623.8	0.625	+	Intergenic	Potri.005G165900	-1251	130.5	0.5	261
Chr07	6212471	6212527	Chr07-43	562.3	0.684	+	promoter-TSS (ID=Potri.007G058100.1.v3.0.exon.5;Parent=Potri.007G058100.1.v3.0;pacid=27016936)	Potri.007G058100	103	130.5	0.5	261	GO:0016779,GO:0003723,GO:0004652,GO:0043631,GO:0005634,GO:0006351	AT1G17980.1	poly(A) polymerase 1
Chr01	32855716	32855772	Chr01-72	553.8	0.821	+	Intergenic	Potri.001G324600	1790	129.5	0.5	259		AT3G07230.1	wound-responsive protein-related
Chr04	23540732	23540788	Chr04-9	1077.9	0.819	+	Intergenic	Potri.004G230100	-1632	251	1	251		AT5G44010.1
Chr02	16237028	16237084	Chr02-51	547.4	0.687	+	promoter-TSS (ID=Potri.002G201300.1.v3.0.exon.1;Parent=Potri.002G201300.1.v3.0;pacid=27021000)	Potri.002G201300	-129	125.5	0.5	251	GO:0008152,GO:0016491,GO:0055114,GO:0015930,GO:0016638,GO:0006537,GO:0006807	AT5G04140.2	glutamate synthase 1
Chr08	8891271	8891327	Chr08-23	1606.2	0.705	+	TTS (ID=Potri.008G133800.2.v3.0.exon.6;Parent=Potri.008G133800.2.v3.0;pacid=27038988)	Potri.008G133800	848	375.5	1.5	250.333		AT4G18210.1	purine permease 10
Chr04	94919	94975	Chr04-53	570.8	0.636	+	Intergenic	Potri.004G000900	-1449	125	0.5	250		AT5G16740.1	Transmembrane amino acid transporter family protein
Chr05	11033510	11033566	Chr05-10	1606.2	0.883	+	Intergenic	Potri.005G135000	-7166	374	1.5	249.333		AT1G70670.1	Caleosin-related family protein
Chr06	9683022	9683078	Chr06-85	558	0.791	+	promoter-TSS (ID=Potri.006G121600.1.v3.0.exon.1;Parent=Potri.006G121600.1.v3.0;pacid=27003469)	Potri.006G121600	-165	124.5	0.5	249		AT2G45430.1	AT-hook motif nuclear-localized protein 22
Chr01	9800061	9800117	Chr01-107	524.1	0.675	+	Intergenic	Potri.001G121300	9923	123.5	0.5	247		AT1G76410.1	RING/U-box superfamily protein
Chr19	7682376	7682432	Chr19-2	8499.8	0.693	+	Intergenic	Potri.019G051200	8775	1960.5	8	245.062		AT4G38100.1
Chr18	12010467	12010523	Chr18-7	1067.2	0.675	+	TTS (ID=Potri.018G090900.3.v3.0.exon.3;Parent=Potri.018G090900.3.v3.0;pacid=27009502)	Potri.018G090900	599	244.5	1	244.5	GO:0004252,GO:0006508	AT3G14240.1	Subtilase family protein
Chr05	13177161	13177217	Chr05-22	1012.1	0.883	+	Intergenic	Potri.005G148400	-14543	239	1	239	GO:0005524,GO:0016301,GO:0008152	AT1G32060.1	phosphoribulokinase
Chr03	13915233	13915289	Chr03-11	1031.2	0.753	+	TTS (ID=Potri.003G115900.1.v3.0.exon.3;Parent=Potri.003G115900.1.v3.0;pacid=26996318)	Potri.003G115900	395	236.5	1	236.5	GO:0005215,GO:0006857,GO:0016020	AT2G37900.1	Major facilitator superfamily protein
Chr11	9465701	9465757	Chr11-34	536.8	0.693	+	Intergenic	Potri.011G085400	68072	118	0.5	236		AT5G48370.2	Thioesterase/thiol ester dehydrase-isomerase superfamily protein
Chr15	1994606	1994662	Chr15-12	1544.6	0.641	+	Intergenic	Potri.015G025600	3939	345	1.5	230		AT2G22400.1	S-adenosyl-L-methionine-dependent methyltransferases superfamily protein
Chr14	5842473	5842529	Chr14-3	2510	0.684	+	promoter-TSS (ID=Potri.014G072400.2.v3.0.exon.2;Parent=Potri.014G072400.2.v3.0;pacid=27033219)	Potri.014G072400	-54	572.5	2.5	229	GO:0004672,GO:0005524,GO:0006468,GO:0005515	AT5G25930.1	Protein kinase family protein with leucine-rich repeat domain
Chr08	4036382	4036438	Chr08-15	969.6	0.813	+	promoter-TSS (ID=Potri.008G066400.1.v3.0.exon.1;Parent=Potri.008G066400.1.v3.0;pacid=27036171)	Potri.008G066400	-526	229	1	229
Chr08	9140348	9140404	Chr08-79	1128.8	0.911	+	promoter-TSS (ID=Potri.008G137300.1.v3.0.exon.2;Parent=Potri.008G137300.1.v3.0;pacid=27037564)	Potri.008G137300	-91	342.5	1.5	228.333	GO:0004861,GO:0007050,GO:0005634	AT5G48820.1	inhibitor/interactor with cyclin-dependent kinase
Chr05	7307447	7307503	Chr05-66	500.7	0.65	+	Intergenic	Potri.005G096700	-1713	114	0.5	228	GO:0005515	AT5G41380.1	CCT motif family protein
Chr15	6986242	6986298	Chr15-69	483.8	0.732	+	Intergenic	Potri.015G053300	-13696	114	0.5	228	GO:0003700,GO:0006355,GO:0005634	AT4G37940.1	AGAMOUS-like 21
Chr17	2714341	2714397	Chr17-23	993	0.604	+	Intergenic	Potri.017G031500	6890	226	1	226	GO:0005524,GO:0016887	AT3G47740.1	ABC2 homolog 2
Chr11	7249674	7249730	Chr11-63	494.4	0.711	+	promoter-TSS (ID=Potri.011G075400.1.v3.0.exon.1;Parent=Potri.011G075400.1.v3.0;pacid=27002663)	Potri.011G075400	-583	113	0.5	226		AT2G01660.1	plasmodesmata-located protein 6
Chr01	18955412	18955468	Chr01-90	513.5	0.822	+	Intergenic	Potri.001G197200	3451	112.5	0.5	225		AT4G28310.1
Chr10	5238054	5238110	Chr10-47	498.6	0.762	+	Intergenic	Potri.010G032800	1721	112	0.5	224	GO:0003700,GO:0043565,GO:0006355	AT4G04890.1	protodermal factor 2
Chr08	12485825	12485881	Chr08-46	483.8	0.845	+	Intergenic	Potri.008G183000	-5638	112	0.5	224	GO:0003677	AT5G02320.1	myb domain protein 3r-5
Chr19	3265969	3266025	Chr19-22	477.4	0.856	+	Intergenic	Potri.019G029200	-2562	112	0.5	224		AT2G01050.1	zinc ion binding;nucleic acid binding
Chr03	20253661	20253717	Chr03-18	6431.1	0.658	+	promoter-TSS (ID=Potri.003G200100.2.v3.0.exon.1;Parent=Potri.003G200100.2.v3.0;pacid=26999364)	Potri.003G200100	-840	1452	6.5	223.385	GO:0004672,GO:0005524,GO:0006468	AT5G40380.1	cysteine-rich RLK (RECEPTOR-like protein kinase) 42
Chr12	194669	194725	Chr12-34	509.2	0.625	+	promoter-TSS (ID=Potri.012G002100.11.v3.0.exon.1;Parent=Potri.012G002100.11.v3.0;pacid=27049888)	Potri.012G002100	-582	111.5	0.5	223		AT2G43160.1	ENTH/VHS family protein
Chr09	6324972	6325028	Chr09-14	950.6	0.8	+	Intergenic	Potri.009G061200	6090	222	1	222	GO:0016491,GO:0016706,GO:0055114	AT1G77330.1	2-oxoglutarate (2OG) and Fe(II)-dependent oxygenase superfamily protein
Chr12	1680776	1680832	Chr12-31	1464	0.674	+	promoter-TSS (ID=Potri.012G018200.8.v3.0.exon.5;Parent=Potri.012G018200.8.v3.0;pacid=27050955)	Potri.012G018200	69	332.5	1.5	221.667	GO:0003677,GO:0006355
Chr06	5864530	5864586	Chr06-29	2187.5	0.81	+	TTS (ID=Potri.006G077600.1.v3.0.exon.4;Parent=Potri.006G077600.1.v3.0;pacid=27006726)	Potri.006G077600	474	661	3	220.333	GO:0004672,GO:0005524,GO:0006468	AT5G39420.1	CDC2C
Chr06	13288726	13288782	Chr06-109	1436.4	0.906	+	Intergenic	Potri.006G151800	3954	330	1.5	220		AT5G05800.1
Chr16	3898488	3898544	Chr16-2	1402.5	0.644	+	promoter-TSS (ID=Potri.016G058000.1.v3.0.exon.3;Parent=Potri.016G058000.1.v3.0;pacid=27013914)	Potri.016G058000	2	328.5	1.5	219	GO:0003700,GO:0043565,GO:0046983,GO:0006355	AT4G38900.2	Basic-leucine zipper (bZIP) transcription factor family protein
Chr14	5355396	5355452	Chr14-26	939.9	0.664	+	Intergenic	Potri.014G066100	-1955	217	1	217	#N/A	#N/A	#N/A
Chr02	21166289	21166345	Chr02-125	473.2	0.68	+	Intergenic	Potri.002G223700	2010	108	0.5	216
Chr07	781299	781355	Chr07-9	1394	0.57	+	exon (ID=Potri.007G009800.1.v3.0.exon.1;Parent=Potri.007G009800.1.v3.0;pacid=27014728, exon 1 of 1)	Potri.007G009800	479	321	1.5	214	GO:0005515	AT1G28340.1	receptor like protein 4
Chr19	10055458	10055514	Chr19-21	468.9	0.631	+	Intergenic	Potri.019G067500	-1282	106.5	0.5	213	GO:0005515	AT3G22190.1	IQ-domain 5
Chr05	16852253	16852309	Chr05-64	1434.3	0.651	+	promoter-TSS (ID=Potri.005G163800.1.v3.0.exon.1;Parent=Potri.005G163800.1.v3.0;pacid=27031572)	Potri.005G163800	-677	318	1.5	212	GO:0006629,GO:0016717,GO:0055114,GO:0016491	AT5G05580.1	fatty acid desaturase 8
Chr11	13207905	13207961	Chr11-2	3598.5	0.82	+	Intergenic	Potri.011G108200	-20244	847	4	211.75	GO:0003677	AT4G09460.1	myb domain protein 6
Chr12	4898455	4898511	Chr12-54	437.1	0.636	+	promoter-TSS (ID=Potri.012G050800.1.v3.0.exon.4;Parent=Potri.012G050800.1.v3.0;pacid=27050007)	Potri.012G050800	-98	105.5	0.5	211	GO:0005515,GO:0004842,GO:0016567,GO:0000151	AT3G07370.1	carboxyl terminus of HSC70-interacting protein
Chr01	8174505	8174561	Chr01-84	462.5	0.761	+	Intergenic	Potri.001G102200	3620	104	0.5	208	GO:0005515,GO:0005247,GO:0006821,GO:0055085,GO:0016020	AT5G33280.1	Voltage-gated chloride channel family protein
Chr09	896479	896535	Chr09-35	456.2	0.737	+	TTS (ID=Potri.009G003900.2.v3.0.exon.18;Parent=Potri.009G003900.2.v3.0;pacid=26986473)	Potri.009G003900	1083	103.5	0.5	207	GO:0003824,GO:0005992	AT5G51460.2	Haloacid dehalogenase-like hydrolase (HAD) superfamily protein
Chr10	5754032	5754088	Chr10-15	880.5	0.773	+	Intergenic	Potri.010G033600	5941	206	1	206	GO:0004672,GO:0005524,GO:0006468	AT4G21410.1	cysteine-rich RLK (RECEPTOR-like protein kinase) 29
Chr11	10874538	10874594	Chr11-65	464.7	0.631	+	TTS (ID=Potri.011G090200.1.v3.0.exon.19;Parent=Potri.011G090200.1.v3.0;pacid=27002303)	Potri.011G090200	871	103	0.5	206	GO:0008270	AT4G36860.1	LIM domain-containing protein
Chr18	12069324	12069380	Chr18-29	445.6	0.738	+	Intergenic	Potri.018G091500	-6976	103	0.5	206
Chr16	3497862	3497918	Chr16-44	441.3	0.667	+	Intergenic	Potri.016G053800	-2470	102.5	0.5	205
Chr19	4749663	4749719	Chr19-3	1780.2	0.643	+	TTS (ID=Potri.019G041000.1.v3.0.exon.1;Parent=Potri.019G041000.1.v3.0;pacid=27025263)	Potri.019G041000	963	408	2	204		AT3G14172.1
Chr06	17063311	17063367	Chr06-126	435	0.758	+	Intergenic	Potri.006G166700	-25865	102	0.5	204		AT5G13490.1	ADP/ATP carrier 2
Chr03	5142262	5142318	Chr03-96	432.8	0.725	+	Intergenic	Potri.003G038900	-8067	101	0.5	202		AT1G10780.1	F-box/RNI-like superfamily protein
Chr16	5498744	5498800	Chr16-37	458.3	0.656	+	promoter-TSS (ID=Potri.016G073400.1.v3.0.exon.1;Parent=Potri.016G073400.1.v3.0;pacid=27011659)	Potri.016G073400	-971	100.5	0.5	201		AT1G53645.1	hydroxyproline-rich glycoprotein family protein
Chr13	1687336	1687392	Chr13-31	430.7	0.846	+	Intergenic	Potri.013G025800	-4530	100	0.5	200
Chr05	11780668	11780724	Chr05-34	6993.3	0.683	+	Intergenic	Potri.005G140500	-1628	1595.5	8	199.438	GO:0016021	AT1G21460.1	Nodulin MtN3 family protein
Chr02	2591755	2591811	Chr02-12	5495.4	0.769	+	promoter-TSS (ID=Potri.002G040600.2.v3.0.exon.11;Parent=Potri.002G040600.2.v3.0;pacid=27024371)	Potri.002G040600	-18	1395.5	7	199.357
Chr10	11865880	11865936	Chr10-8	1302.8	0.702	+	Intergenic	Potri.010G096400	-2688	295.5	1.5	197		AT5G24490.1	30S ribosomal protein, putative
Chr03	6038991	6039047	Chr03-65	424.4	0.632	+	Intergenic	Potri.003G045100	3196	98.5	0.5	197		AT3G04810.1	NIMA-related kinase 2
Chr08	3992988	3993044	Chr08-58	422.2	0.655	+	Intergenic	Potri.008G065900	-1752	98.5	0.5	197		AT3G21710.2
Chr01	6836953	6837009	Chr01-46	2399.7	0.674	+	Intergenic	Potri.001G086500	5047	586.5	3	195.5		AT1G74160.1
Chr14	10384656	10384712	Chr14-6	1283.7	0.675	+	TTS (ID=Potri.014G135900.1.v3.0.exon.2;Parent=Potri.014G135900.1.v3.0;pacid=27033806)	Potri.014G135900	1052	291.5	1.5	194.333	GO:0003677,GO:0008270,GO:0006355	AT5G60200.1	TARGET OF MONOPTEROS 6
Chr19	10350048	10350104	Chr19-23	428.6	0.665	+	promoter-TSS (ID=Potri.019G070100.1.v3.0.exon.9;Parent=Potri.019G070100.1.v3.0;pacid=27026373)	Potri.019G070100	-150	97	0.5	194	GO:0009116	AT2G35390.2	Phosphoribosyltransferase family protein
Chr02	1156958	1157014	Chr02-100	422.2	0.709	+	Intergenic	Potri.002G019800	-3059	96	0.5	192		AT2G29670.1	Tetratricopeptide repeat (TPR)-like superfamily protein
Chr04	8667006	8667062	Chr04-79	409.5	0.636	+	Intergenic	Potri.004G100100	-5128	96	0.5	192	GO:0003924,GO:0005525	AT1G07940.1	GTP binding Elongation factor Tu family protein
Chr05	13219114	13219170	Chr05-117	458.3	0.762	+	Intergenic	Potri.005G148500	-3735	95.5	0.5	191	GO:0046872,GO:0030001	AT4G08570.1	Heavy metal transport/detoxification superfamily protein
Chr03	8486942	8486998	Chr03-73	413.7	0.591	+	Intergenic	Potri.003G057100	-12133	95.5	0.5	191		AT2G37740.1	zinc-finger protein 10
Chr15	6998834	6998890	Chr15-6	31340.6	0.572	+	Intergenic	Potri.015G053300	-1104	7510	39.5	190.127
Chr11	2638330	2638386	Chr11-46	451.9	0.669	+	promoter-TSS (ID=Potri.011G031900.4.v3.0.exon.2;Parent=Potri.011G031900.4.v3.0;pacid=27002253)	Potri.011G031900	-364	95	0.5	190	GO:0003700,GO:0043565,GO:0006355,GO:0003677,GO:0005634	AT2G23760.1	BEL1-like homeodomain 4
Chr06	1068074	1068130	Chr06-82	426.5	0.694	+	exon (ID=Potri.006G015600.1.v3.0.exon.1;Parent=Potri.006G015600.1.v3.0;pacid=27004175, exon 1 of 1)	Potri.006G015600	640	95	0.5	190		AT4G31890.1	ARM repeat superfamily protein
Chr02	387924	387980	Chr02-68	846.6	0.656	+	promoter-TSS (ID=Potri.002G007200.1.v3.0.exon.1;Parent=Potri.002G007200.1.v3.0;pacid=27022830)	Potri.002G007100	562	187.5	1	187.5	GO:0003697,GO:0005524,GO:0006281,GO:0009432	AT2G19490.1	recA DNA recombination family protein
Chr07	6593129	6593185	Chr07-18	819	0.582	+	Intergenic	Potri.007G060900	-34218	186.5	1	186.5	GO:0005515,GO:0008565,GO:0006606,GO:0005634,GO:0005737,GO:0006886,GO:0005643	AT3G06720.1	importin alpha isoform 1
Chr16	10569174	10569230	Chr16-10	819	0.773	+	promoter-TSS (ID=Potri.016G105800.1.v3.0.exon.1;Parent=Potri.016G105800.1.v3.0;pacid=27012343)	Potri.016G105800	-368	186	1	186		AT5G15680.1	ARM repeat superfamily protein
scaffold_31	369630	369686	scaffold_31-1	780.8	0.668	+	Intergenic	Potri.T029600	-10016	186	1	186		AT2G04240.1	RING/U-box superfamily protein
Chr10	8055798	8055854	Chr10-72	394.6	0.66	+	Intergenic	Potri.010G049800	3230	93	0.5	186
Chr12	11393908	11393964	Chr12-3	6388.6	0.696	+	promoter-TSS (ID=Potri.012G087000.1.v3.0.exon.1;Parent=Potri.012G087000.1.v3.0;pacid=27050753)	Potri.012G087000	-204	1485	8	185.625	GO:0008837,GO:0009089	AT3G53580.1	diaminopimelate epimerase family protein
Chr03	19461693	19461749	Chr03-4	29129.7	0.637	+	Intergenic	Potri.003G189600	1729	6273	34	184.5		AT2G01940.1	C2H2-like zinc finger protein
Chr15	11082426	11082482	Chr15-71	379.8	0.65	+	promoter-TSS (ID=Potri.015G088200.2.v3.0.exon.8;Parent=Potri.015G088200.2.v3.0;pacid=27019140)	Potri.015G088200	296	92	0.5	184		AT5G13340.1
Chr05	22546301	22546357	Chr05-92	407.4	0.644	+	Intergenic	Potri.005G211600	6286	91.5	0.5	183		AT1G31130.1
Chr05	4814194	4814250	Chr05-32	848.7	0.689	+	promoter-TSS (ID=Potri.005G067000.2.v3.0.exon.2;Parent=Potri.005G067000.2.v3.0;pacid=27028463)	Potri.005G067000	-53	182.5	1	182.5	GO:0016620,GO:0055114	AT1G42970.1	glyceraldehyde-3-phosphate dehydrogenase B subunit
Chr10	12742319	12742375	Chr10-71	384	0.842	+	promoter-TSS (ID=Potri.010G107900.1.v3.0.exon.3;Parent=Potri.010G107900.1.v3.0;pacid=26981577)	Potri.010G107900	97	91	0.5	182	GO:0003677	AT2G32460.1	myb domain protein 101
Chr14	1823463	1823519	Chr14-14	1818.4	0.753	+	promoter-TSS (ID=Potri.014G020200.1.v3.0.exon.5;Parent=Potri.014G020200.1.v3.0;pacid=27034275)	Potri.014G020200	454	452.5	2.5	181		AT4G32020.1
Chr15	9826221	9826277	Chr15-70	430.7	0.652	+	Intergenic	Potri.015G073800	2593	90.5	0.5	181		AT3G05200.1	RING/U-box superfamily protein
Chr19	7750740	7750796	Chr19-13	1888.4	0.82	+	Intergenic	Potri.019G051300	-4564	451.5	2.5	180.6	GO:0009055,GO:0051536	AT3G16250.1	NDH-dependent cyclic electron flow 1
Chr10	11074224	11074280	Chr10-22	821.1	0.704	+	Intergenic	Potri.010G085700	-1165	180.5	1	180.5	GO:0003676,GO:0005524,GO:0008026,GO:0004386	AT3G19760.1	eukaryotic initiation factor 4A-III
Chr17	494354	494410	Chr17-30	1145.8	0.703	+	promoter-TSS (ID=Potri.017G007200.1.v3.0.exon.5;Parent=Potri.017G007200.1.v3.0;pacid=26985590)	Potri.017G007200	-216	269.5	1.5	179.667	GO:0004806,GO:0006629	AT2G31690.1	alpha/beta-Hydrolases superfamily protein
Chr18	3210634	3210690	Chr18-1	3460.6	0.753	+	promoter-TSS (ID=Potri.018G038900.1.v3.0.exon.1;Parent=Potri.018G038900.1.v3.0;pacid=27009544)	Potri.018G038900	-314	806	4.5	179.111	GO:0055085,GO:0016021	AT1G80530.1	Major facilitator superfamily protein
Chr12	3903960	3904016	Chr12-41	396.8	0.671	+	Intergenic	Potri.012G043200	-2920	89	0.5	178		AT5G15510.1	TPX2 (targeting protein for Xklp2) protein family
Chr06	23893377	23893433	Chr06-3	6660.2	0.748	+	promoter-TSS (ID=Potri.006G227600.1.v3.0.exon.3;Parent=Potri.006G227600.1.v3.0;pacid=27007969)	Potri.006G227600	-253	1505	8.5	177.059	GO:0005515	AT4G24020.1	NIN like protein 7
Chr08	17352749	17352805	Chr08-80	401	0.675	+	Intergenic	Potri.008G214900	-26354	88.5	0.5	177		AT2G34090.1	maternal effect embryo arrest 18
Chr11	5956721	5956777	Chr11-55	401	0.66	+	promoter-TSS (ID=Potri.011G065000.3.v3.0.exon.3;Parent=Potri.011G065000.3.v3.0;pacid=27003064)	Potri.011G065000	80	88.5	0.5	177	GO:0003677,GO:0046983,GO:0003700,GO:0006355,GO:0005634,GO:0043565	AT1G71692.1	AGAMOUS-like 12
Chr02	22849209	22849265	Chr02-109	388.3	0.785	+	TTS (ID=Potri.002G234900.1.v3.0.exon.2;Parent=Potri.002G234900.1.v3.0;pacid=27024019)	Potri.002G234900	378	88.5	0.5	177	GO:0006629	AT2G39220.1	PATATIN-like protein 6
Chr17	11923548	11923604	Chr17-17	789.3	0.685	+	Intergenic	Potri.017G102500	-3939	176.5	1	176.5		AT5G48970.1	Mitochondrial substrate carrier family protein
Chr02	2390963	2391019	Chr02-92	390.4	0.581	+	promoter-TSS (ID=Potri.002G037300.1.v3.0.exon.2;Parent=Potri.002G037300.1.v3.0;pacid=27022084)	Potri.002G037300	293	88	0.5	176		AT1G14020.1	O-fucosyltransferase family protein
Chr07	3973453	3973509	Chr07-46	377.7	0.667	+	promoter-TSS (ID=Potri.007G045100.1.v3.0.exon.1;Parent=Potri.007G045100.1.v3.0;pacid=27015446)	Potri.007G045100	-214	87	0.5	174		AT1G49920.1	MuDR family transposase
Chr03	15096790	15096846	Chr03-9	4031.4	0.677	+	Intergenic	Potri.003G131400	-3923	953	5.5	173.273	GO:0004672,GO:0005524,GO:0006468,GO:0005515	AT5G56040.2	Leucine-rich receptor-like protein kinase family protein
Chr06	18494392	18494448	Chr06-137	388.3	0.74	+	TTS (ID=Potri.006G174100.1.v3.0.exon.1;Parent=Potri.006G174100.1.v3.0;pacid=27008255)	Potri.006G174100	1077	86.5	0.5	173		AT1G22060.1
Chr06	4565183	4565239	Chr06-114	384	0.702	+	promoter-TSS (ID=Potri.006G062200.1.v3.0.exon.4;Parent=Potri.006G062200.1.v3.0;pacid=27004408)	Potri.006G062200	129	86.5	0.5	173	GO:0003700,GO:0043565,GO:0006355	AT3G18010.1	WUSCHEL related homeobox 1
Chr11	11127222	11127278	Chr11-71	379.8	0.623	+	Intergenic	Potri.011G091800	6273	86.5	0.5	173		AT3G23165.1	low-molecular-weight cysteine-rich 42
Chr03	16001010	16001066	Chr03-75	371.3	0.623	+	promoter-TSS (ID=Potri.003G143600.1.v3.0.exon.3;Parent=Potri.003G143600.1.v3.0;pacid=26996994)	Potri.003G143600	-50	86.5	0.5	173	GO:0003677,GO:0005524,GO:0006260,GO:0016851,GO:0015979,GO:0015995,GO:0016887	AT2G14050.1	minichromosome maintenance 9
Chr04	6679568	6679624	Chr04-74	367.1	0.748	+	Intergenic	Potri.004G081000	-2537	86.5	0.5	173	GO:0003700,GO:0043565,GO:0046983,GO:0006355	AT5G06839.3	bZIP transcription factor family protein
Chr07	394438	394494	Chr07-14	763.8	0.695	+	promoter-TSS (ID=Potri.007G005400.1.v3.0.exon.2;Parent=Potri.007G005400.1.v3.0;pacid=27014380)	Potri.007G005400	-548	172.5	1	172.5		AT1G67060.1
Chr14	17442715	17442771	Chr14-33	623.8	0.764	+	Intergenic	Potri.014G190700	10101	172	1	172		AT1G65540.1	LETM1-like protein
Chr04	16989844	16989900	Chr04-59	369.2	0.705	+	Intergenic	Potri.004G146900	4128	86	0.5	172	GO:0003677,GO:0003887,GO:0006260,GO:0003676,GO:0008408,GO:0006139,GO:0005622	AT1G50840.1	polymerase gamma 2
Chr14	11977260	11977316	Chr14-45	369.2	0.64	+	Intergenic	Potri.014G153700	-1085	86	0.5	172	GO:0004601,GO:0020037,GO:0006979,GO:0055114	AT5G67400.1	root hair specific 19
Chr06	20739711	20739767	Chr06-23	1086.3	0.658	+	Intergenic	Potri.006G193000	-1871	257.5	1.5	171.667	GO:0004672,GO:0005524,GO:0006468	AT3G06030.1	NPK1-related protein kinase 3
Chr06	17845432	17845488	Chr06-67	776.6	0.67	+	promoter-TSS (ID=Potri.006G170800.1.v3.0.exon.2;Parent=Potri.006G170800.1.v3.0;pacid=27004623)	Potri.006G170800	-699	170.5	1	170.5
Chr06	12590776	12590832	Chr06-90	392.5	0.573	+	promoter-TSS (ID=Potri.006G146800.1.v3.0.exon.2;Parent=Potri.006G146800.1.v3.0;pacid=27006943)	Potri.006G146800	-49	85	0.5	170	GO:0005515,GO:0007165,GO:0005622,GO:0045087,GO:0031224,GO:0004888	AT3G25510.1	disease resistance protein (TIR-NBS-LRR class), putative
Chr07	12217993	12218049	Chr07-16	1540.4	0.68	+	promoter-TSS (ID=Potri.007G096100.2.v3.0.exon.14;Parent=Potri.007G096100.2.v3.0;pacid=27016423)	Potri.007G096100	130	336	2	168	GO:0015238,GO:0015297,GO:0006855,GO:0055085,GO:0016020	AT4G23030.1	MATE efflux family protein
scaffold_53	225874	225930	scaffold_53-1	358.6	0.648	+	Intergenic	Potri.T058500	12750	83.5	0.5	167	GO:0003824	AT2G33700.1	Protein phosphatase 2C family protein
Chr01	847344	847400	Chr01-8	2291.5	0.694	+	promoter-TSS (ID=Potri.001G012400.1.v3.0.exon.1;Parent=Potri.001G012400.1.v3.0;pacid=27043915)	Potri.001G012400	-905	500	3	166.667	GO:0003824	AT4G27800.1	thylakoid-associated phosphatase 38
Chr04	20637528	20637584	Chr04-17	732	0.662	+	promoter-TSS (ID=Potri.004G192100.1.v3.0.exon.3;Parent=Potri.004G192100.1.v3.0;pacid=26989435)	Potri.004G192100	-311	166.5	1	166.5	GO:0016747	AT2G19070.1	spermidine hydroxycinnamoyl transferase
Chr14	12500536	12500592	Chr14-55	712.9	0.73	+	Intergenic	Potri.014G159500	-4880	166	1	166	GO:0003676	AT5G65260.1	RNA-binding (RRM/RBD/RNP motifs) family protein
Chr05	1590580	1590636	Chr05-136	364.9	0.656	+	Intergenic	Potri.005G020400	2787	83	0.5	166		AT4G32810.1	carotenoid cleavage dioxygenase 8
Chr16	7197248	7197304	Chr16-46	354.3	0.606	+	Intergenic	Potri.016G089200	-12449	83	0.5	166
Chr03	15586361	15586417	Chr03-29	2096.3	0.69	+	Intergenic	Potri.003G137400	-1953	492	3	164	GO:0003677	AT5G17800.1	myb domain protein 56
Chr04	4060462	4060518	Chr04-62	362.8	0.566	+	Intergenic	Potri.004G052100	-4407	82	0.5	164	GO:0000166,GO:0046872,GO:0003824,GO:0008152,GO:0016020,GO:0015662,GO:0006812,GO:0006754	AT2G24520.1	H(+)-ATPase 5
Chr03	10009947	10010003	Chr03-158	356.5	0.898	+	Intergenic	Potri.003G071700	3184	81.5	0.5	163	GO:0004672,GO:0005524,GO:0006468	AT4G27290.1	S-locus lectin protein kinase family protein
Chr15	14480164	14480220	Chr15-66	356.5	0.633	+	Intergenic	Potri.015G135100	8306	81.5	0.5	163	GO:0004672,GO:0005524,GO:0006468,GO:0004674	AT2G20470.1	AGC (cAMP-dependent, cGMP-dependent and protein kinase C) kinase family protein
Chr03	18009057	18009113	Chr03-93	345.8	0.643	+	promoter-TSS (ID=Potri.003G170000.3.v3.0.exon.2;Parent=Potri.003G170000.3.v3.0;pacid=26997171)	Potri.003G170000	-822	81.5	0.5	163	GO:0003677,GO:0005634	AT1G69170.1	Squamosa promoter-binding protein-like (SBP domain) transcription factor family protein
scaffold_35	274382	274438	scaffold_35-1	341.6	0.79	+	Intergenic	Potri.T033800	80375	81.5	0.5	163	GO:0003700,GO:0043565,GO:0006355,GO:0003677,GO:0005634	AT1G62990.1	KNOTTED-like homeobox of Arabidopsis thaliana 7
Chr01	4075526	4075582	Chr01-12	2119.6	0.771	+	Intergenic	Potri.001G053400	-1095	487.5	3	162.5		AT4G02210.1
Chr01	31939375	31939431	Chr01-36	717.2	0.779	+	TTS (ID=Potri.001G313500.1.v3.0.exon.1;Parent=Potri.001G313500.1.v3.0;pacid=27041616)	Potri.001G313500	1166	162	1	162	GO:0003676,GO:0008270	AT1G04990.1	Zinc finger C-x8-C-x5-C-x3-H type family protein
Chr01	21531560	21531616	Chr01-162	345.8	0.596	+	Intergenic	Potri.001G213000	-4216	81	0.5	162		AT1G26800.1	RING/U-box superfamily protein
Chr01	15953994	15954050	Chr01-135	343.7	0.883	+	promoter-TSS (ID=Potri.001G182900.2.v3.0.exon.2;Parent=Potri.001G182900.2.v3.0;pacid=27048372)	Potri.001G182900	-108	81	0.5	162
Chr08	15780423	15780479	Chr08-51	1069.4	0.733	+	Intergenic	Potri.008G208100	-6496	242.5	1.5	161.667	GO:0001104,GO:0006357,GO:0016592,GO:0016455	AT3G04740.1	RNA polymerase II transcription mediators
Chr14	6805402	6805458	Chr14-47	1355.8	0.828	+	Intergenic	Potri.014G086500	-1636	322	2	161	GO:0005515	AT1G05910.1	cell division cycle protein 48-related / CDC48-related
Chr03	13442386	13442442	Chr03-78	367.1	0.613	+	Intergenic	Potri.003G110900	-4876	80.5	0.5	161		AT4G15570.1	P-loop containing nucleoside triphosphate hydrolases superfamily protein
Chr09	8982500	8982556	Chr09-41	759.6	0.689	+	Intergenic	Potri.009G101700	-1512	160	1	160	GO:0043531,GO:0006915,GO:0005524	AT3G07040.1	NB-ARC domain-containing disease resistance protein
Chr05	19084058	19084114	Chr05-142	358.6	0.687	+	Intergenic	Potri.005G175300	8271	80	0.5	160	GO:0004672,GO:0005524,GO:0006468	AT4G35500.1	Protein kinase superfamily protein
Chr01	4361149	4361205	Chr01-257	354.3	0.85	+	Intergenic	Potri.001G057400	-5914	80	0.5	160		AT2G42240.1	RNA-binding (RRM/RBD/RNP motifs) family protein
Chr01	45778685	45778741	Chr01-190	350.1	0.685	+	Intergenic	Potri.001G428400	-3945	80	0.5	160		AT3G48200.1
Chr08	13724053	13724109	Chr08-29	679	0.723	+	promoter-TSS (ID=Potri.008G196500.3.v3.0.exon.2;Parent=Potri.008G196500.3.v3.0;pacid=27037938)	Potri.008G196500	-193	159.5	1	159.5		AT2G17270.1	phosphate transporter 3;3
Chr06	7854635	7854691	Chr06-15	1060.9	0.713	+	promoter-TSS (ID=Potri.006G101500.3.v3.0.exon.1;Parent=Potri.006G101500.3.v3.0;pacid=27008472)	Potri.006G101500	-504	239	1.5	159.333	GO:0015079,GO:0071805,GO:0016020	AT2G30070.1	potassium transporter 1
Chr16	3248301	3248357	Chr16-38	352.2	0.763	+	Intergenic	Potri.016G051000	4948	79.5	0.5	159		AT1G22460.1	O-fucosyltransferase family protein
Chr05	10192596	10192652	Chr05-55	691.7	0.66	+	Intergenic	Potri.005G128900	-1315	157.5	1	157.5		AT5G58040.1	homolog of yeast FIP1 [V]
Chr01	19886882	19886938	Chr01-92	670.5	0.691	+	Intergenic	Potri.001G202700	-26350	156	1	156	GO:0003676,GO:0005634	AT5G51660.1	cleavage and polyadenylation specificity factor 160
Chr14	13133531	13133587	Chr14-84	362.8	0.648	+	Intergenic	Potri.014G165500	4002	78	0.5	156	GO:0007049	AT5G10810.1	enhancer of rudimentary protein, putative
Chr19	10792624	10792680	Chr19-25	657.7	0.668	+	Intergenic	Potri.019G073900	3605	154.5	1	154.5	GO:0003676,GO:0008270	AT1G32360.1	Zinc finger (CCCH-type) family protein
Chr08	7167324	7167380	Chr08-11	1663.5	0.709	+	promoter-TSS (ID=Potri.008G112200.1.v3.0.exon.1;Parent=Potri.008G112200.1.v3.0;pacid=27039636)	Potri.008G112200	-922	383	2.5	153.2	GO:0003735,GO:0006412,GO:0005622,GO:0005840	AT3G10950.1	Zinc-binding ribosomal protein family protein
Chr17	825727	825783	Chr17-11	1014.2	0.679	+	TTS (ID=Potri.017G009600.1.v3.0.exon.8;Parent=Potri.017G009600.1.v3.0;pacid=26985539)	Potri.017G009600	1778	229.5	1.5	153	GO:0016020,GO:0055085	AT1G77610.1	EamA-like transporter family protein
Chr16	2288211	2288267	Chr16-58	335.2	0.661	+	promoter-TSS (ID=Potri.016G037400.2.v3.0.exon.3;Parent=Potri.016G037400.2.v3.0;pacid=27013821)	Potri.016G037400	70	76.5	0.5	153	GO:0016746,GO:0008152,GO:0008415	AT1G51260.1	lysophosphatidyl acyltransferase 3
scaffold_73	19674	19730	scaffold_73-1	2425.2	0.666	+	promoter-TSS (ID=Potri.T067700.1.v3.0.exon.2;Parent=Potri.T067700.1.v3.0;pacid=26996176)	Potri.T067700	-11	533	3.5	152.286	GO:0003676,GO:0005622	AT1G30480.1	D111/G-patch domain-containing protein
Chr01	48782472	48782528	Chr01-147	331	0.662	+	Intergenic	Potri.001G452600	2887	76	0.5	152	GO:0005515	AT1G06230.1	global transcription factor group E4
Chr13	15394280	15394336	Chr13-71	326.8	0.759	+	Intergenic	Potri.013G149400	4936	76	0.5	152	GO:0003700,GO:0043565,GO:0046983,GO:0006355	AT2G40620.1	Basic-leucine zipper (bZIP) transcription factor family protein
Chr16	13598512	13598568	Chr16-51	339.5	0.638	+	Intergenic	Potri.016G132600	-23277	75.5	0.5	151		AT1G53200.1
Chr14	941063	941119	Chr14-82	328.9	0.683	+	Intergenic	Potri.014G009300	-7162	75.5	0.5	151	GO:0004672,GO:0005524,GO:0006468	AT5G20050.1	Protein kinase superfamily protein
scaffold_41	62024	62080	scaffold_41-1	320.4	0.842	+	TTS (ID=Potri.T042900.1.v3.0.exon.3;Parent=Potri.T042900.1.v3.0;pacid=26993188)	Potri.T042900	981	75.5	0.5	151
Chr17	13565838	13565894	Chr17-8	1949.9	0.648	+	TTS (ID=Potri.017G122900.2.v3.0.exon.2;Parent=Potri.017G122900.2.v3.0;pacid=26985546)	Potri.017G122900	-1196	452.5	3	150.833
Chr17	5317528	5317584	Chr17-27	653.5	0.704	+	promoter-TSS (ID=Potri.017G058300.1.v3.0.exon.4;Parent=Potri.017G058300.1.v3.0;pacid=26983242)	Potri.017G058300	79	150.5	1	150.5	GO:0004672,GO:0005524,GO:0006468,GO:0005515,GO:0006412,GO:0004812	AT3G59410.1	protein kinase family protein
Chr01	36981803	36981859	Chr01-21	954.8	0.791	+	promoter-TSS (ID=Potri.001G359400.1.v3.0.exon.8;Parent=Potri.001G359400.1.v3.0;pacid=27041791)	Potri.001G359400	-570	225.5	1.5	150.333		AT4G25170.1	Uncharacterised conserved protein (UCP012943)
Chr19	1075426	1075482	Chr19-6	4069.5	0.662	+	Intergenic	Potri.019G009200	4377	976	6.5	150.154	GO:0005515	AT5G01660.1
Chr13	10849303	10849359	Chr13-81	337.4	0.723	+	TTS (ID=Potri.013G099200.1.v3.0.exon.2;Parent=Potri.013G099200.1.v3.0;pacid=26995758)	Potri.013G099200	229	75	0.5	150	GO:0004672,GO:0005524,GO:0006468	AT1G11050.1	Protein kinase superfamily protein
Chr10	8201608	8201664	Chr10-98	326.8	0.705	+	promoter-TSS (ID=Potri.010G051400.2.v3.0.exon.1;Parent=Potri.010G051400.2.v3.0;pacid=26979236)	Potri.010G051400	-495	75	0.5	150
Chr15	1883961	1884017	Chr15-65	320.4	0.726	+	promoter-TSS (ID=Potri.015G024200.1.v3.0.exon.1;Parent=Potri.015G024200.1.v3.0;pacid=27019093)	Potri.015G024200	-582	75	0.5	150	GO:0005515,GO:0008565,GO:0006886	AT5G19820.1	ARM repeat superfamily protein
Chr02	1133164	1133220	Chr02-32	664.1	0.769	+	promoter-TSS (ID=Potri.002G019500.4.v3.0.exon.2;Parent=Potri.002G019500.4.v3.0;pacid=27024017)	Potri.002G019500	136	149	1	149
Chr01	33853774	33853830	Chr01-202	341.6	0.686	+	Intergenic	Potri.001G335300	-1776	74.5	0.5	149	GO:0003677,GO:0005634	AT5G50670.1	Squamosa promoter-binding protein-like (SBP domain) transcription factor family protein
Chr08	9390334	9390390	Chr08-120	331	0.673	+	promoter-TSS (ID=Potri.008G140700.1.v3.0.exon.3;Parent=Potri.008G140700.1.v3.0;pacid=27039605)	Potri.008G140700	-281	74.5	0.5	149	GO:0004601,GO:0020037,GO:0006979,GO:0055114	AT4G32320.1	ascorbate peroxidase 6
Chr04	14675703	14675759	Chr04-101	335.2	0.68	+	Intergenic	Potri.004G130700	-1917	74	0.5	148	GO:0005634	AT3G56990.1	embryo sac development arrest 7
Chr05	18783520	18783576	Chr05-112	318.3	0.8	+	Intergenic	Potri.005G172400	-8560	74	0.5	148
Chr03	13302186	13302242	Chr03-10	1232.7	0.645	+	promoter-TSS (ID=Potri.003G109400.4.v3.0.exon.5;Parent=Potri.003G109400.4.v3.0;pacid=26997030)	Potri.003G109400	-113	294	2	147	GO:0005515,GO:0005737	AT2G33490.1	hydroxyproline-rich glycoprotein family protein
Chr11	6487863	6487919	Chr11-32	636.5	0.613	+	promoter-TSS (ID=Potri.011G069500.1.v3.0.exon.1;Parent=Potri.011G069500.1.v3.0;pacid=27001666)	Potri.011G069500	49	146.5	1	146.5	GO:0003677	AT4G21440.1	MYB-like 102
Chr13	6307546	6307602	Chr13-4	3399.1	0.609	+	promoter-TSS (ID=Potri.013G074100.2.v3.0.exon.1;Parent=Potri.013G074100.2.v3.0;pacid=26995105)	Potri.013G074200	672	804	5.5	146.182		AT3G14470.1	NB-ARC domain-containing disease resistance protein
Chr15	10121507	10121563	Chr15-33	645	0.76	+	promoter-TSS (ID=Potri.015G076200.1.v3.0.exon.12;Parent=Potri.015G076200.1.v3.0;pacid=27017986)	Potri.015G076200	200	146	1	146	GO:0005634	AT1G44110.1	Cyclin A1;1
Chr04	11990127	11990183	Chr04-102	316.1	0.665	+	promoter-TSS (ID=Potri.004G124100.1.v3.0.exon.1;Parent=Potri.004G124100.1.v3.0;pacid=26991385)	Potri.004G124100	-720	73	0.5	146	GO:0004672,GO:0005524,GO:0006468,GO:0005488	AT5G55830.1	Concanavalin A-like lectin protein kinase family protein
Chr05	5477117	5477173	Chr05-44	651.4	0.753	+	promoter-TSS (ID=Potri.005G074800.1.v3.0.exon.1;Parent=Potri.005G074800.1.v3.0;pacid=27027626)	Potri.005G074800	-972	145.5	1	145.5		AT5G53590.1	SAUR-like auxin-responsive protein family
Chr01	4307282	4307338	Chr01-85	625.9	0.667	+	Intergenic	Potri.001G056800	-8015	145.5	1	145.5		AT2G07698.1	ATPase, F1 complex, alpha subunit protein
Chr10	7355720	7355776	Chr10-12	3237.8	0.777	+	Intergenic	Potri.010G042700	7473	872	6	145.333	GO:0055085,GO:0016021	AT3G51860.1	cation exchanger 3
Chr06	22667060	22667116	Chr06-129	309.8	0.677	+	TTS (ID=Potri.006G213000.3.v3.0.exon.11;Parent=Potri.006G213000.3.v3.0;pacid=27004381)	Potri.006G213000	402	72.5	0.5	145	GO:0005507,GO:0008131,GO:0048038,GO:0009308,GO:0055114	AT2G42490.1	Copper amine oxidase family protein
Chr09	7677500	7677556	Chr09-23	632.3	0.674	+	promoter-TSS (ID=Potri.009G080300.3.v3.0.exon.1;Parent=Potri.009G080300.3.v3.0;pacid=26985746)	Potri.009G080300	-780	144.5	1	144.5		AT2G18350.1	homeobox protein 24
Chr15	14225183	14225239	Chr15-2	4075.9	0.695	+	promoter-TSS (ID=Potri.015G131600.3.v3.0.exon.1;Parent=Potri.015G131600.3.v3.0;pacid=27018840)	Potri.015G131600	-661	938	6.5	144.308	GO:0016788,GO:0006629	AT1G29670.1	GDSL-like Lipase/Acylhydrolase superfamily protein
Chr04	13594472	13594528	Chr04-26	630.2	0.787	+	Intergenic	Potri.004G128400	34841	144	1	144	GO:0015969	AT3G17470.1	Ca2+-activated RelA/spot homolog
Chr01	36064250	36064306	Chr01-152	337.4	0.64	+	Intergenic	Potri.001G352600	1172	72	0.5	144		AT1G33980.1	Smg-4/UPF3 family protein
Chr05	10115660	10115716	Chr05-107	328.9	0.629	+	promoter-TSS (ID=Potri.005G128000.1.v3.0.exon.1;Parent=Potri.005G128000.1.v3.0;pacid=27029940)	Potri.005G128000	30	72	0.5	144	GO:0016758,GO:0008152	AT3G21750.1	UDP-glucosyl transferase 71B1
Chr17	14763747	14763803	Chr17-10	1245.5	0.676	+	promoter-TSS (ID=Potri.017G139600.1.v3.0.exon.1;Parent=Potri.017G139600.1.v3.0;pacid=26984336)	Potri.017G139600	-433	286.5	2	143.25	GO:0005515	AT4G25230.1	RPM1 interacting protein 2
Chr17	11174547	11174603	Chr17-2	5527.2	0.776	+	Intergenic	Potri.017G094800	-2206	1288.5	9	143.167		AT2G31280.1	conserved peptide upstream open reading frame 7
Chr14	12745227	12745283	Chr14-42	653.5	0.605	+	promoter-TSS (ID=Potri.014G161800.3.v3.0.exon.3;Parent=Potri.014G161800.3.v3.0;pacid=27032301)	Potri.014G161800	-92	143	1	143	GO:0003700,GO:0008270,GO:0043565,GO:0006355	AT4G17570.3	GATA transcription factor 26
Chr18	2571533	2571589	Chr18-64	303.4	0.693	+	Intergenic	Potri.018G033100	-1079	71.5	0.5	143		AT4G37190.1
Chr06	2243702	2243758	Chr06-1	11137.1	0.798	+	promoter-TSS (ID=Potri.006G033500.1.v3.0.exon.7;Parent=Potri.006G033500.1.v3.0;pacid=27007800)	Potri.006G033500	-82	2566.5	18	142.583		AT5G47540.1	Mo25 family protein
Chr01	43146348	43146404	Chr01-41	636.5	0.907	+	Intergenic	Potri.001G408700	-12322	142.5	1	142.5		AT1G52140.1
Chr09	7624544	7624600	Chr09-8	1512.8	0.679	+	promoter-TSS (ID=Potri.009G079600.2.v3.0.exon.1;Parent=Potri.009G079600.2.v3.0;pacid=26986035)	Potri.009G079600	-899	356	2.5	142.4		AT5G44500.1	Small nuclear ribonucleoprotein family protein
Chr01	4748967	4749023	Chr01-16	1220	0.757	+	promoter-TSS (ID=Potri.001G061500.1.v3.0.exon.2;Parent=Potri.001G061500.1.v3.0;pacid=27047843)	Potri.001G061500	141	284.5	2	142.25	GO:0003855,GO:0004764,GO:0055114,GO:0005737	AT3G06350.1	dehydroquinate dehydratase, putative / shikimate dehydrogenase, putative
Chr19	11883207	11883263	Chr19-14	2894.1	0.652	+	promoter-TSS (ID=Potri.019G086800.1.v3.0.exon.1;Parent=Potri.019G086800.1.v3.0;pacid=27025051)	Potri.019G086800	-949	639	4.5	142	GO:0005515	AT2G20190.1	CLIP-associated protein
Chr05	16562378	16562434	Chr05-84	613.2	0.87	+	Intergenic	Potri.005G161800	-11058	142	1	142		AT1G15100.1	RING-H2 finger A2A
Chr18	8989884	8989940	Chr18-54	292.8	0.781	+	promoter-TSS (ID=Potri.018G070700.2.v3.0.exon.1;Parent=Potri.018G070700.2.v3.0;pacid=27011273)	Potri.018G070700	-175	71	0.5	142	GO:0000156,GO:0000160,GO:0006355,GO:0000155,GO:0007165,GO:0016020,GO:0005515	AT3G04580.1	Signal transduction histidine kinase, hybrid-type, ethylene sensor
Chr05	3968291	3968347	Chr05-13	2136.6	0.679	+	TTS (ID=Potri.005G056300.1.v3.0.exon.2;Parent=Potri.005G056300.1.v3.0;pacid=27028749)	Potri.005G056300	560	496	3.5	141.714	GO:0000166,GO:0046872,GO:0003824,GO:0008152	AT3G27870.1	ATPase E1-E2 type family protein / haloacid dehalogenase-like hydrolase family protein
scaffold_1213	10877	10933	scaffold_1213-1	9076.9	0.772	+	Intergenic	Potri.T172800	-8260	2053	14.5	141.586	GO:0005215,GO:0006857,GO:0016020	AT2G37900.1	Major facilitator superfamily protein
Chr05	19929978	19930034	Chr05-74	946.3	0.626	+	Intergenic	Potri.005G182700	-8571	212	1.5	141.333	GO:0005515	AT3G18060.1	transducin family protein / WD-40 repeat family protein
Chr08	3414439	3414495	Chr08-93	314	0.668	+	promoter-TSS (ID=Potri.008G057700.1.v3.0.exon.1;Parent=Potri.008G057700.1.v3.0;pacid=27038993)	Potri.008G057700	-809	70.5	0.5	141		AT4G00755.1	F-box family protein
Chr07	11361311	11361367	Chr07-13	7110	0.658	+	Intergenic	Potri.007G087600	-2341	1691	12	140.917		AT3G02970.1	EXORDIUM like 6
Chr01	18899360	18899416	Chr01-68	619.6	0.653	+	TTS (ID=Potri.001G197000.1.v3.0.exon.3;Parent=Potri.001G197000.1.v3.0;pacid=27046006)	Potri.001G197000	1251	140.5	1	140.5	GO:0003830,GO:0006487,GO:0016020	AT2G13290.1	beta-1,4-N-acetylglucosaminyltransferase family protein
Chr10	19854118	19854174	Chr10-27	4687	0.679	+	promoter-TSS (ID=Potri.010G209100.1.v3.0.exon.5;Parent=Potri.010G209100.1.v3.0;pacid=26979510)	Potri.010G209100	258	1120.5	8	140.062
Chr13	14088784	14088840	Chr13-26	1498	0.679	+	Intergenic	Potri.013G128500	1679	350	2.5	140		AT3G01680.1
Chr02	14166648	14166704	Chr02-162	331	0.689	+	promoter-TSS (ID=Potri.002G181400.1.v3.0.exon.6;Parent=Potri.002G181400.1.v3.0;pacid=27024150)	Potri.002G181400	-53	70	0.5	140		AT4G14200.1	Pentatricopeptide repeat (PPR) superfamily protein
Chr17	10783966	10784022	Chr17-44	328.9	0.675	+	promoter-TSS (ID=Potri.017G090400.4.v3.0.exon.2;Parent=Potri.017G090400.4.v3.0;pacid=26984496)	Potri.017G090400	-270	70	0.5	140
Chr05	335904	335960	Chr05-109	324.6	0.65	+	Intergenic	Potri.005G005900	-2294	70	0.5	140	GO:0003700,GO:0043565,GO:0006355,GO:0003677,GO:0005634,GO:0006351,GO:0016563	AT5G06710.1	homeobox from Arabidopsis thaliana
Chr11	9762770	9762826	Chr11-99	314	0.715	+	Intergenic	Potri.011G086000	50602	70	0.5	140	GO:0004672,GO:0005524,GO:0006468	AT3G47570.1	Leucine-rich repeat protein kinase family protein
Chr01	35977145	35977201	Chr01-234	307.7	0.791	+	Intergenic	Potri.001G352300	3555	70	0.5	140		AT5G65490.1
Chr12	7996760	7996816	Chr12-60	292.8	0.753	+	Intergenic	Potri.012G064200	-14577	70	0.5	140	GO:0022857,GO:0055085,GO:0016021	AT3G13050.1	Major facilitator superfamily protein
Chr12	3556661	3556717	Chr12-1	27179.8	0.833	+	promoter-TSS (ID=Potri.012G040200.1.v3.0.exon.1;Parent=Potri.012G040200.1.v3.0;pacid=27050246)	Potri.012G040200	-465	6208	44.5	139.506	GO:0046961,GO:0015991,GO:0033178	AT4G11150.1	vacuolar ATP synthase subunit E1
Chr10	3720316	3720372	Chr10-59	664.1	0.733	+	Intergenic	Potri.010G026500	4268	209	1.5	139.333	GO:0004672,GO:0005524,GO:0006468	AT2G18890.1	Protein kinase superfamily protein
Chr13	5284124	5284180	Chr13-16	2094.2	0.671	+	Intergenic	Potri.013G067000	-17361	487.5	3.5	139.286		AT5G49630.1	amino acid permease 6
Chr04	22554151	22554207	Chr04-24	5206.8	0.687	+	Intergenic	Potri.004G218900	-1440	1253	9	139.222	GO:0046923,GO:0006621,GO:0016021	AT1G29330.1	ER lumen protein retaining receptor family protein
Chr13	3475098	3475154	Chr13-20	1614.7	0.605	+	TTS (ID=Potri.013G047900.1.v3.0.exon.1;Parent=Potri.013G047900.1.v3.0;pacid=26995733)	Potri.013G047900	2349	417	3	139		AT5G60970.1	TEOSINTE BRANCHED 1, cycloidea and PCF transcription factor 5
Chr11	18429402	18429458	Chr11-26	625.9	0.808	+	Intergenic	Potri.011G169100	-2433	139	1	139	GO:0008270	AT1G67340.1	HCP-like superfamily protein with MYND-type zinc finger
Chr05	13215477	13215533	Chr05-115	299.2	0.812	+	promoter-TSS (ID=Potri.005G148500.1.v3.0.exon.1;Parent=Potri.005G148500.1.v3.0;pacid=27030710)	Potri.005G148500	-98	69.5	0.5	139	GO:0006904,GO:0016192	AT2G42700.1
Chr06	13616492	13616548	Chr06-20	1476.7	0.637	+	Intergenic	Potri.006G152900	-1452	346	2.5	138.4	GO:0051205,GO:0016021	AT5G62050.1	homolog of yeast oxidase assembly 1 (OXA1)
Chr03	14215102	14215158	Chr03-43	2382.7	0.701	+	promoter-TSS (ID=Potri.003G119500.1.v3.0.exon.4;Parent=Potri.003G119500.1.v3.0;pacid=26998070)	Potri.003G119500	122	552.5	4	138.125
Chr16	11807624	11807680	Chr16-9	876.3	0.863	+	Intergenic	Potri.016G114200	-3052	207	1.5	138	GO:0004672,GO:0005524,GO:0006468,GO:0016773,GO:0009103,GO:0016020	AT1G74740.1	calcium-dependent protein kinase 30
Chr04	22019416	22019472	Chr04-82	307.7	0.625	+	TTS (ID=Potri.004G212500.1.v3.0.exon.7;Parent=Potri.004G212500.1.v3.0;pacid=26989655)	Potri.004G212500	1028	69	0.5	138	GO:0005524,GO:0016887	AT4G19210.1	RNAse l inhibitor protein 2
Chr05	25758736	25758792	Chr05-125	305.5	0.647	+	TTS (ID=Potri.005G258600.4.v3.0.exon.4;Parent=Potri.005G258600.4.v3.0;pacid=27028353)	Potri.005G258600	812	69	0.5	138	GO:0003677,GO:0006355	AT3G19184.1	AP2/B3-like transcriptional factor family protein
Chr16	7818328	7818384	Chr16-26	2505.8	0.837	+	Intergenic	Potri.016G092900	-21462	758.5	5.5	137.909		AT3G20362.1
Chr12	14907126	14907182	Chr12-17	867.8	0.661	+	Intergenic	Potri.012G132500	2677	206	1.5	137.333		AT4G13440.1	Calcium-binding EF-hand family protein
Chr06	5225772	5225828	Chr06-13	1196.7	0.695	+	promoter-TSS (ID=Potri.006G069800.1.v3.0.exon.2;Parent=Potri.006G069800.1.v3.0;pacid=27004431)	Potri.006G069800	37	274.5	2	137.25		AT2G01050.1	zinc ion binding;nucleic acid binding
Chr02	17749202	17749258	Chr02-40	1773.8	0.698	+	Intergenic	Potri.002G208700	-30413	411.5	3	137.167
Chr19	7743134	7743190	Chr19-33	307.7	0.638	+	Intergenic	Potri.019G051300	-12170	68.5	0.5	137		AT1G28760.1	Uncharacterized conserved protein (DUF2215)
Chr07	7324449	7324505	Chr07-76	299.2	0.675	+	Intergenic	Potri.007G062000	25576	68.5	0.5	137	GO:0005515	AT3G49660.1	Transducin/WD40 repeat-like superfamily protein
Chr04	22832753	22832809	Chr04-112	297	0.622	+	promoter-TSS (ID=Potri.004G221800.1.v3.0.exon.1;Parent=Potri.004G221800.1.v3.0;pacid=26990248)	Potri.004G221800	-718	68.5	0.5	137	GO:0000156,GO:0000160,GO:0006355,GO:0000155,GO:0007165,GO:0016020,GO:0005524	AT2G01830.2	CHASE domain containing histidine kinase protein
Chr08	2582473	2582529	Chr08-27	3846.8	0.667	+	TTS (ID=Potri.008G044900.1.v3.0.exon.1;Parent=Potri.008G044900.1.v3.0;pacid=27038096)	Potri.008G044900	153	1095	8	136.875	GO:0016616,GO:0051287,GO:0055114	AT5G15490.1	UDP-glucose 6-dehydrogenase family protein
Chr05	8468674	8468730	Chr05-5	9437.6	0.647	+	promoter-TSS (ID=Potri.005G110000.2.v3.0.exon.1;Parent=Potri.005G110000.2.v3.0;pacid=27031042)	Potri.005G110000	-859	2251	16.5	136.424		AT2G26580.1	plant-specific transcription factor YABBY family protein
Chr08	849373	849429	Chr08-37	577.1	0.667	+	TTS (ID=Potri.008G015600.1.v3.0.exon.3;Parent=Potri.008G015600.1.v3.0;pacid=27037815)	Potri.008G015600	1123	136	1	136	GO:0003677,GO:0046983,GO:0003700,GO:0006355,GO:0005634,GO:0043565	AT2G45660.1	AGAMOUS-like 20
Chr01	11511769	11511825	Chr01-179	292.8	0.851	+	Intergenic	Potri.001G142500	-3771	68	0.5	136	GO:0016491,GO:0055114,GO:0003854,GO:0016616,GO:0006694,GO:0030060,GO:0006108	AT1G53240.1	Lactate/malate dehydrogenase family protein
Chr10	18932250	18932306	Chr10-11	9233.9	0.649	+	Intergenic	Potri.010G195800	-4570	2174	16	135.875
Chr12	6785602	6785658	Chr12-68	311.9	0.67	+	Intergenic	Potri.012G062200	-9479	67.5	0.5	135		AT2G01050.1	zinc ion binding;nucleic acid binding
Chr01	49052625	49052681	Chr01-253	294.9	0.737	+	promoter-TSS (ID=Potri.001G455800.2.v3.0.exon.6;Parent=Potri.001G455800.2.v3.0;pacid=27048268)	Potri.001G455800	186	67.5	0.5	135	GO:0003676	AT1G76460.1	RNA-binding (RRM/RBD/RNP motifs) family protein
Chr13	7118929	7118985	Chr13-86	286.4	0.683	+	Intergenic	Potri.013G080800	14765	67.5	0.5	135	GO:0005515	AT3G62760.1	Glutathione S-transferase family protein
Chr18	8718534	8718590	Chr18-17	568.6	0.81	+	Intergenic	Potri.018G068300	2344	134.5	1	134.5	GO:0004672,GO:0005524,GO:0006468,GO:0006950	AT5G63940.1	Protein kinase protein with adenine nucleotide alpha hydrolases-like domain
Chr06	17634659	17634715	Chr06-69	929.3	0.602	+	Intergenic	Potri.006G169800	8003	201	1.5	134	GO:0005515	AT1G73150.1	global transcription factor group E3
Chr01	9133176	9133232	Chr01-59	575	0.764	+	promoter-TSS (ID=Potri.001G114100.1.v3.0.exon.1;Parent=Potri.001G114100.1.v3.0;pacid=27048199)	Potri.001G114100	-989	134	1	134		AT5G25070.1
Chr09	9087330	9087386	Chr09-60	305.5	0.69	+	promoter-TSS (ID=Potri.009G103400.3.v3.0.exon.7;Parent=Potri.009G103400.3.v3.0;pacid=26986413)	Potri.009G103400	-301	67	0.5	134		AT5G53400.1	HSP20-like chaperones superfamily protein
Chr01	34898909	34898965	Chr01-222	294.9	0.754	+	TTS (ID=Potri.001G343700.2.v3.0.exon.6;Parent=Potri.001G343700.2.v3.0;pacid=27040759)	Potri.001G343700	765	67	0.5	134		AT1G80510.1	Transmembrane amino acid transporter family protein
Chr03	20489301	20489357	Chr03-99	288.6	0.659	+	TTS (ID=Potri.003G203900.1.v3.0.exon.3;Parent=Potri.003G203900.1.v3.0;pacid=26998821)	Potri.003G203900	919	67	0.5	134	GO:0016020	AT4G22120.1	ERD (early-responsive to dehydration stress) family protein
Chr01	55085	55141	Chr01-334	280.1	0.703	+	TTS (ID=Potri.001G000700.1.v3.0.exon.5;Parent=Potri.001G000700.1.v3.0;pacid=27042969)	Potri.001G000700	602	67	0.5	134	GO:0005634	AT2G21150.1	XAP5 family protein
Chr19	4633980	4634036	Chr19-7	7534.4	0.683	+	TTS (ID=Potri.019G040700.1.v3.0.exon.1;Parent=Potri.019G040700.1.v3.0;pacid=27026448)	Potri.019G040700	289	1941	14.5	133.862		AT1G75800.1	Pathogenesis-related thaumatin superfamily protein
Chr14	8966418	8966474	Chr14-53	901.8	0.871	+	Intergenic	Potri.014G115000	-1812	200.5	1.5	133.667	GO:0016021	AT1G13580.2	LAG1 longevity assurance homolog 3
Chr01	138327	138383	Chr01-57	865.7	0.728	+	promoter-TSS (ID=Potri.001G002100.1.v3.0.exon.2;Parent=Potri.001G002100.1.v3.0;pacid=27046658)	Potri.001G002100	-961	200.5	1.5	133.667	GO:0003824	AT5G53140.1	Protein phosphatase 2C family protein
Chr09	9625753	9625809	Chr09-51	592	0.64	+	promoter-TSS (ID=Potri.009G113100.1.v3.0.exon.1;Parent=Potri.009G113100.1.v3.0;pacid=26986913)	Potri.009G113100	-577	133	1	133	GO:0003676,GO:0055114,GO:0016491	AT4G17720.1	RNA-binding (RRM/RBD/RNP motifs) family protein
Chr10	12787857	12787913	Chr10-123	294.9	0.657	+	promoter-TSS (ID=Potri.010G108300.1.v3.0.exon.1;Parent=Potri.010G108300.1.v3.0;pacid=26978921)	Potri.010G108300	64	66.5	0.5	133	GO:0003676	AT1G07350.1	RNA-binding (RRM/RBD/RNP motifs) family protein
Chr05	22885069	22885125	Chr05-6	2860.1	0.71	+	promoter-TSS (ID=Potri.005G215700.1.v3.0.exon.2;Parent=Potri.005G215700.1.v3.0;pacid=27029735)	Potri.005G215700	-301	662.5	5	132.5		AT5G25080.1	Sas10/Utp3/C1D family
Chr03	18645661	18645717	Chr03-23	886.9	0.583	+	promoter-TSS (ID=Potri.003G178700.1.v3.0.exon.1;Parent=Potri.003G178700.1.v3.0;pacid=26998836)	Potri.003G178700	-36	198.5	1.5	132.333	GO:0005515,GO:0008236,GO:0006508	AT4G17740.1	Peptidase S41 family protein
Chr06	7889822	7889878	Chr06-120	307.7	0.701	+	promoter-TSS (ID=Potri.006G102000.3.v3.0.exon.1;Parent=Potri.006G102000.3.v3.0;pacid=27007690)	Potri.006G102000	-210	66	0.5	132	GO:0005524,GO:0016887,GO:0016020	AT1G71960.1	ATP-binding casette family G25
Chr11	5528216	5528272	Chr11-33	562.3	0.801	+	TTS (ID=Potri.011G062000.1.v3.0.exon.1;Parent=Potri.011G062000.1.v3.0;pacid=27002746)	Potri.011G062000	180	131.5	1	131.5	GO:0008152,GO:0016491,GO:0055114,GO:0015930,GO:0016638,GO:0006537,GO:0006807	AT5G04140.1	glutamate synthase 1
Chr04	19285012	19285068	Chr04-36	562.3	0.727	+	Intergenic	Potri.004G174400	-1985	131	1	131		AT4G04630.1	Protein of unknown function, DUF584
Chr06	17428322	17428378	Chr06-21	863.6	0.789	+	Intergenic	Potri.006G168900	-3733	196	1.5	130.667	GO:0003735,GO:0006412,GO:0005840	AT3G13580.1	Ribosomal protein L30/L7 family protein
Chr19	10171149	10171205	Chr19-1	16004.5	0.732	+	promoter-TSS (ID=Potri.019G068400.2.v3.0.exon.4;Parent=Potri.019G068400.2.v3.0;pacid=27026983)	Potri.019G068400	348	3707.5	28.5	130.088	GO:0004672,GO:0005524,GO:0006468	AT2G28250.1	Protein kinase superfamily protein
Chr05	17439183	17439239	Chr05-156	275.8	0.672	+	Intergenic	Potri.005G166800	-37429	65	0.5	130	GO:0003676,GO:0008168,GO:0032259,GO:0001510	AT5G01230.1	S-adenosyl-L-methionine-dependent methyltransferases superfamily protein
Chr10	5567664	5567720	Chr10-1	47565.7	0.728	+	Intergenic	Potri.010G033400	-101719	11655.5	90	129.506	GO:0019901,GO:0000079	AT2G44740.1	cyclin p4;1
Chr04	21106809	21106865	Chr04-30	558	0.884	+	Intergenic	Potri.004G198600	-1920	129.5	1	129.5	GO:0004672,GO:0005524,GO:0006468,GO:0048544,GO:0005529,GO:0004674	AT4G21390.1	S-locus lectin protein kinase family protein
Chr11	4969258	4969314	Chr11-41	1389.8	0.7	+	Intergenic	Potri.011G056800	-8246	323.5	2.5	129.4	GO:0005515	AT1G80410.1	tetratricopeptide repeat (TPR)-containing protein
Chr17	15309526	15309582	Chr17-1	8777.7	0.911	+	TTS (ID=Potri.017G145500.1.v3.0.exon.4;Parent=Potri.017G145500.1.v3.0;pacid=26985493)	Potri.017G145500	1105	2060	16	128.75	GO:0005515	AT3G15470.1	Transducin/WD40 repeat-like superfamily protein
Chr03	17244866	17244922	Chr03-16	1101.2	0.91	+	Intergenic	Potri.003G161200	-2222	257	2	128.5		AT3G44370.1	Membrane insertion protein, OxaA/YidC with tetratricopeptide repeat domain
Chr05	4584555	4584611	Chr05-17	1124.5	0.66	+	promoter-TSS (ID=Potri.005G063700.1.v3.0.exon.1;Parent=Potri.005G063700.1.v3.0;pacid=27029023)	Potri.005G063700	-676	256.5	2	128.25	GO:0005515,GO:0003723,GO:0006396	AT1G14650.1	SWAP (Suppressor-of-White-APricot)/surp domain-containing protein / ubiquitin family protein
Chr10	19288751	19288807	Chr10-125	301.3	0.662	+	Intergenic	Potri.010G201200	-5941	64	0.5	128		AT1G09450.1	Protein kinase superfamily protein
Chr08	14010905	14010961	Chr08-84	275.8	0.701	+	TTS (ID=Potri.008G199500.1.v3.0.exon.1;Parent=Potri.008G199500.1.v3.0;pacid=27036925)	Potri.008G199400	879	64	0.5	128		AT1G67140.3	HEAT repeat-containing protein
Chr10	22122183	22122239	Chr10-44	551.7	0.719	+	Intergenic	Potri.010G247500	-1747	127	1	127	GO:0016787	AT2G16430.2	purple acid phosphatase 10
Chr08	9173491	9173547	Chr08-95	297	0.623	+	promoter-TSS (ID=Potri.008G137900.1.v3.0.exon.10;Parent=Potri.008G137900.1.v3.0;pacid=27039201)	Potri.008G137900	-166	63.5	0.5	127	GO:0030528,GO:0006355	AT5G54680.1	basic helix-loop-helix (bHLH) DNA-binding superfamily protein
Chr19	1426899	1426955	Chr19-46	290.7	0.671	+	Intergenic	Potri.019G012100	-3274	63.5	0.5	127	GO:0003677	AT4G15020.1	hAT transposon superfamily
Chr10	15725674	15725730	Chr10-143	280.1	0.746	+	promoter-TSS (ID=Potri.010G148000.1.v3.0.exon.4;Parent=Potri.010G148000.1.v3.0;pacid=26981388)	Potri.010G148000	-215	63.5	0.5	127		AT4G16845.1	VEFS-Box of polycomb protein
Chr15	2594587	2594643	Chr15-84	278	0.606	+	Intergenic	Potri.015G032200	-3831	63.5	0.5	127	GO:0022857,GO:0055085,GO:0016021	AT2G38940.1	phosphate transporter 1;4
Chr04	18180008	18180064	Chr04-58	572.9	0.665	+	Intergenic	Potri.004G161300	3553	126.5	1	126.5		AT3G14000.1	DZC (Disease resistance/zinc finger/chromosome condensation-like region) domain containing protein
Chr16	2210512	2210568	Chr16-21	560.1	0.729	+	promoter-TSS (ID=Potri.016G036900.2.v3.0.exon.11;Parent=Potri.016G036900.2.v3.0;pacid=27013619)	Potri.016G036900	-480	126.5	1	126.5	GO:0003676,GO:0008270,GO:0006351,GO:0003677,GO:0003899	AT4G16265.1	RNA polymerases M/15 Kd subunit
Chr02	23751286	23751342	Chr02-69	553.8	0.639	+	Intergenic	Potri.002G246300	-2686	126.5	1	126.5		AT5G20540.1	BREVIS RADIX-like 4
Chr14	14191838	14191894	Chr14-39	536.8	0.641	+	Intergenic	Potri.014G174800	-2978	126.5	1	126.5	GO:0046872	AT1G65920.1	Regulator of chromosome condensation (RCC1) family with FYVE zinc finger domain
Chr02	21358690	21358746	Chr02-2	11879.8	0.827	+	Intergenic	Potri.002G225000	3462	2719	21.5	126.465	GO:0008883,GO:0050661,GO:0033014,GO:0055114,GO:0016491,GO:0005737,GO:0004764	AT1G58290.1	Glutamyl-tRNA reductase family protein
Chr10	15611341	15611397	Chr10-23	827.5	0.631	+	TTS (ID=Potri.010G146500.1.v3.0.exon.1;Parent=Potri.010G146500.1.v3.0;pacid=26981872)	Potri.010G146500	1356	189.5	1.5	126.333		AT1G28380.1	MAC/Perforin domain-containing protein
Chr06	5133668	5133724	Chr06-84	534.7	0.697	+	Intergenic	Potri.006G068500	-1085	126	1	126	GO:0004672,GO:0005524,GO:0006468,GO:0048544,GO:0005529	AT1G11340.1	S-locus lectin protein kinase family protein
Chr18	809433	809489	Chr18-102	282.2	0.809	+	Intergenic	Potri.018G011100	-2836	63	0.5	126	GO:0005524,GO:0016887	AT1G33360.1	ATP-dependent Clp protease
Chr11	3428049	3428105	Chr11-98	280.1	0.656	+	TTS (ID=Potri.011G040400.1.v3.0.exon.3;Parent=Potri.011G040400.1.v3.0;pacid=27001907)	Potri.011G040400	1608	63	0.5	126	GO:0004672,GO:0005524,GO:0006468,GO:0005515	AT4G29990.1	Leucine-rich repeat transmembrane protein kinase protein
Chr11	8251473	8251529	Chr11-87	273.7	0.658	+	Intergenic	Potri.011G082200	3769	63	0.5	126		AT3G46780.1	plastid transcriptionally active 16
Chr02	12054078	12054134	Chr02-161	271.6	0.726	+	promoter-TSS (ID=Potri.002G160100.2.v3.0.exon.3;Parent=Potri.002G160100.2.v3.0;pacid=27023209)	Potri.002G160100	-208	63	0.5	126		AT1G31040.1	PLATZ transcription factor family protein
Chr01	25886437	25886493	Chr01-188	271.6	0.8	+	promoter-TSS (ID=Potri.001G249100.3.v3.0.exon.10;Parent=Potri.001G249100.3.v3.0;pacid=27048001)	Potri.001G249100	-62	63	0.5	126
Chr13	3175808	3175864	Chr13-33	812.6	0.848	+	promoter-TSS (ID=Potri.013G044900.1.v3.0.exon.1;Parent=Potri.013G044900.1.v3.0;pacid=26994473)	Potri.013G044900	-1	188.5	1.5	125.667		AT1G61415.1
Chr05	7024381	7024437	Chr05-31	819	0.636	+	promoter-TSS (ID=Potri.005G093900.1.v3.0.exon.1;Parent=Potri.005G093900.1.v3.0;pacid=27031496)	Potri.005G093900	-56	187.5	1.5	125	GO:0008152	AT4G35830.1	aconitase 1
Chr11	1610735	1610791	Chr11-77	301.3	0.71	+	Intergenic	Potri.011G019000	-6732	62.5	0.5	125	GO:0004455,GO:0008652,GO:0055114,GO:0016491,GO:0009082	AT3G58610.1	ketol-acid reductoisomerase
Chr11	7937579	7937635	Chr11-80	294.9	0.583	+	Intergenic	Potri.011G080100	-1103	62.5	0.5	125	GO:0046872,GO:0030001	AT3G05220.1	Heavy metal transport/detoxification superfamily protein
Chr02	12713140	12713196	Chr02-124	282.2	0.675	+	Intergenic	Potri.002G168200	-17267	62.5	0.5	125		AT2G01940.1	C2H2-like zinc finger protein
Chr18	3269146	3269202	Chr18-77	278	0.672	+	TTS (ID=Potri.018G039500.1.v3.0.exon.3;Parent=Potri.018G039500.1.v3.0;pacid=27009762)	Potri.018G039500	763	62.5	0.5	125	GO:0009058	AT3G15940.1	UDP-Glycosyltransferase superfamily protein
Chr01	13892167	13892223	Chr01-240	267.3	0.526	+	Intergenic	Potri.001G165600	7215	62.5	0.5	125	GO:0004672,GO:0005524,GO:0006468,GO:0005515	AT1G55610.1	BRI1 like
Chr04	4056231	4056287	Chr04-104	261	0.819	+	promoter-TSS (ID=Potri.004G052100.1.v3.0.exon.2;Parent=Potri.004G052100.1.v3.0;pacid=26989977)	Potri.004G052100	-176	62.5	0.5	125	GO:0004672,GO:0005524,GO:0006468	AT3G59110.1	Protein kinase superfamily protein
Chr09	6341546	6341602	Chr09-11	1167	0.717	+	promoter-TSS (ID=Potri.009G061500.1.v3.0.exon.2;Parent=Potri.009G061500.1.v3.0;pacid=26985944)	Potri.009G061500	-615	249.5	2	124.75		AT1G01320.1	Tetratricopeptide repeat (TPR)-like superfamily protein
Chr08	4921855	4921911	Chr08-2	5310.8	0.792	+	promoter-TSS (ID=Potri.008G079100.2.v3.0.exon.2;Parent=Potri.008G079100.2.v3.0;pacid=27036241)	Potri.008G079200	923	1181	9.5	124.316	GO:0004672,GO:0005524,GO:0006468	AT1G52290.1	Protein kinase superfamily protein
Chr13	6625336	6625392	Chr13-85	307.7	0.737	+	promoter-TSS (ID=Potri.013G077000.1.v3.0.exon.4;Parent=Potri.013G077000.1.v3.0;pacid=26996105)	Potri.013G077000	-282	62	0.5	124	GO:0016020,GO:0009765	AT1G76570.1	Chlorophyll A-B binding family protein
Chr12	6320651	6320707	Chr12-85	267.3	0.629	+	exon (ID=Potri.012G059900.1.v3.0.exon.1;Parent=Potri.012G059900.1.v3.0;pacid=27049108, exon 1 of 1)	Potri.012G059900	139	62	0.5	124	GO:0004871,GO:0019001,GO:0007186	AT1G31930.1	extra-large GTP-binding protein 3
Chr11	1642910	1642966	Chr11-90	265.2	0.668	+	TTS (ID=Potri.011G019200.1.v3.0.exon.3;Parent=Potri.011G019200.1.v3.0;pacid=27001264)	Potri.011G019200	1091	62	0.5	124		AT5G13250.1	RING finger protein
Chr14	6858816	6858872	Chr14-77	261	0.676	+	promoter-TSS (ID=Potri.014G086900.1.v3.0.exon.1;Parent=Potri.014G086900.1.v3.0;pacid=27033723)	Potri.014G086900	-181	62	0.5	124		AT3G60470.1	Plant protein of unknown function (DUF247)
Chr01	39531679	39531735	Chr01-10	1867.2	0.737	+	Intergenic	Potri.001G378800	-4751	433.5	3.5	123.857	GO:0016998
Chr04	1120398	1120454	Chr04-5	1088.5	0.79	+	promoter-TSS (ID=Potri.004G016700.3.v3.0.exon.7;Parent=Potri.004G016700.3.v3.0;pacid=26990015)	Potri.004G016700	-345	246	2	123	GO:0004672,GO:0005524,GO:0006468	AT2G36350.1	Protein kinase superfamily protein
Chr11	16190271	16190327	Chr11-11	1591.3	0.621	+	Intergenic	Potri.011G139700	2970	366.5	3	122.167
scaffold_1655	7	57	scaffold_1655-1	672.6	0.705	+	TTS (ID=Potri.T177300.1.v3.0.exon.1;Parent=Potri.T177300.1.v3.0;pacid=26989021)	Potri.T177300	375	122	1	122	GO:0004672,GO:0005524,GO:0006468,GO:0048544,GO:0005529	AT2G19130.1	S-locus lectin protein kinase family protein
Chr02	13623258	13623314	Chr02-140	273.7	0.716	+	Intergenic	Potri.002G176800	1742	61	0.5	122	GO:0010309,GO:0055114	AT4G14710.5	RmlC-like cupins superfamily protein
Chr10	1611459	1611515	Chr10-108	265.2	0.731	+	Intergenic	Potri.010G012100	3629	61	0.5	122	GO:0016491,GO:0008152,GO:0055114,GO:0006081,GO:0004030	AT1G44170.1	aldehyde dehydrogenase 3H1
Chr15	11563180	11563236	Chr15-59	833.9	0.823	+	promoter-TSS (ID=Potri.015G094300.1.v3.0.exon.4;Parent=Potri.015G094300.1.v3.0;pacid=27018731)	Potri.015G094300	-291	182	1.5	121.333		AT2G43060.1	ILI1 binding bHLH 1
Chr11	16044856	16044912	Chr11-64	547.4	0.676	+	Intergenic	Potri.011G137000	-2605	121	1	121	GO:0016829,GO:0006099	AT2G47510.1	fumarase 1
Chr01	2099777	2099833	Chr01-140	545.3	0.701	+	Intergenic	Potri.001G028200	-3357	121	1	121		AT5G23280.1	TCP family transcription factor
Chr02	15718513	15718569	Chr02-152	286.4	0.638	+	Intergenic	Potri.002G196300	-1763	60.5	0.5	121	GO:0003700,GO:0043565,GO:0006355	AT4G24240.1	WRKY DNA-binding protein 7
Chr17	4725536	4725592	Chr17-67	271.6	0.72	+	promoter-TSS (ID=Potri.017G053900.1.v3.0.exon.1;Parent=Potri.017G053900.1.v3.0;pacid=26985660)	Potri.017G053900	-225	60.5	0.5	121		AT5G52430.1	hydroxyproline-rich glycoprotein family protein
Chr08	1214963	1215019	Chr08-34	787.2	0.685	+	Intergenic	Potri.008G023500	-3256	180.5	1.5	120.333		AT4G11450.1	Protein of unknown function (DUF3527)
Chr05	23053277	23053333	Chr05-19	1088.5	0.652	+	Intergenic	Potri.005G218200	-3927	240.5	2	120.25	GO:0000902,GO:0005524	AT1G11660.1	heat shock protein 70 (Hsp 70) family protein
Chr01	3990808	3990864	Chr01-13	1357.9	0.705	+	promoter-TSS (ID=Potri.001G052300.1.v3.0.exon.3;Parent=Potri.001G052300.1.v3.0;pacid=27041711)	Potri.001G052300	-197	300.5	2.5	120.2		AT5G01720.1	RNI-like superfamily protein
Chr06	2696767	2696823	Chr06-93	547.4	0.776	+	promoter-TSS (ID=Potri.006G038400.3.v3.0.exon.16;Parent=Potri.006G038400.3.v3.0;pacid=27007934)	Potri.006G038400	-269	120	1	120	GO:0003735,GO:0006412,GO:0005840,GO:0015934	ATCG00780.1	ribosomal protein L14
Chr12	9669961	9670017	Chr12-74	258.9	0.809	+	promoter-TSS (ID=Potri.012G071600.1.v3.0.exon.18;Parent=Potri.012G071600.1.v3.0;pacid=27050287)	Potri.012G071600	176	60	0.5	120	GO:0045454,GO:0005515	AT5G65160.1	tetratricopeptide repeat (TPR)-containing protein
Chr14	12058957	12059013	Chr14-86	250.4	0.888	+	Intergenic	Potri.014G155000	-1915	60	0.5	120
Chr06	6315714	6315770	Chr06-50	1092.7	0.636	+	promoter-TSS (ID=Potri.006G083500.3.v3.0.exon.1;Parent=Potri.006G083500.3.v3.0;pacid=27004160)	Potri.006G083500	-361	239	2	119.5		AT3G59390.1
Chr11	5922926	5922982	Chr11-38	517.7	0.69	+	Intergenic	Potri.011G064700	-1401	119	1	119	GO:0004553,GO:0005975	AT5G58090.1	O-Glycosyl hydrolases family 17 protein
Chr06	4415923	4415979	Chr06-144	261	0.685	+	promoter-TSS (ID=Potri.006G060500.1.v3.0.exon.1;Parent=Potri.006G060500.1.v3.0;pacid=27007589)	Potri.006G060500	-280	59.5	0.5	119	GO:0030528,GO:0006355	AT1G59640.1	BIG PETAL P
Chr14	9373099	9373155	Chr14-71	254.6	0.844	+	Intergenic	Potri.014G121100	1348	59.5	0.5	119	GO:0003677,GO:0006355	AT4G28530.1	NAC domain containing protein 74
Chr01	29853712	29853768	Chr01-332	246.1	0.743	+	Intergenic	Potri.001G293300	-2772	59.5	0.5	119	GO:0003677,GO:0006355	AT1G79580.1	NAC (No Apical Meristem) domain transcriptional regulator superfamily protein
Chr01	27159465	27159521	Chr01-110	850.8	0.673	+	promoter-TSS (ID=Potri.001G262600.3.v3.0.exon.6;Parent=Potri.001G262600.3.v3.0;pacid=27042662)	Potri.001G262600	-112	177	1.5	118	GO:0004672,GO:0005524,GO:0006468,GO:0006950	AT1G77280.1	Protein kinase protein with adenine nucleotide alpha hydrolases-like domain
Chr15	11135416	11135472	Chr15-91	256.7	0.626	+	promoter-TSS (ID=Potri.015G089000.1.v3.0.exon.1;Parent=Potri.015G089000.1.v3.0;pacid=27019012)	Potri.015G089000	-111	59	0.5	118	GO:0004553,GO:0005975	AT4G34480.1	O-Glycosyl hydrolases family 17 protein
Chr06	7285568	7285624	Chr06-145	254.6	0.678	+	promoter-TSS (ID=Potri.006G095600.2.v3.0.exon.3;Parent=Potri.006G095600.2.v3.0;pacid=27005983)	Potri.006G095600	489	59	0.5	118	GO:0005506,GO:0009055,GO:0016705,GO:0020037,GO:0055114	AT3G26300.1	cytochrome P450, family 71, subfamily B, polypeptide 34
Chr06	17877952	17878008	Chr06-407	252.5	0.915	+	Intergenic	Potri.006G171100	-6254	59	0.5	118		AT1G16020.1	Protein of unknown function (DUF1712)
Chr11	5183777	5183833	Chr11-30	1018.4	0.6	+	promoter-TSS (ID=Potri.011G058400.1.v3.0.exon.1;Parent=Potri.011G058400.1.v3.0;pacid=27002526)	Potri.011G058400	-283	235	2	117.5		AT2G46690.1	SAUR-like auxin-responsive protein family
Chr05	506069	506125	Chr05-211	997.2	0.992	+	Intergenic	Potri.005G007900	8909	235	2	117.5	GO:0005515	AT1G05910.1	cell division cycle protein 48-related / CDC48-related
Chr15	1732203	1732259	Chr15-25	524.1	0.686	+	Intergenic	Potri.015G022400	6495	117	1	117		AT2G44060.1	Late embryogenesis abundant protein, group 2
Chr13	14226762	14226818	Chr13-51	511.3	0.682	+	Intergenic	Potri.013G130700	-5207	117	1	117	GO:0006810,GO:0005886,GO:0010044	AT1G08440.1	Aluminium activated malate transporter family protein
Chr18	13533196	13533252	Chr18-74	250.4	0.89	+	exon (ID=Potri.018G109000.1.v3.0.exon.1;Parent=Potri.018G109000.1.v3.0;pacid=27010876, exon 1 of 1)	Potri.018G109000	106	58.5	0.5	117		AT4G22600.1
Chr04	11176255	11176311	Chr04-180	250.4	0.636	+	promoter-TSS (ID=Potri.004G119700.1.v3.0.exon.1;Parent=Potri.004G119700.1.v3.0;pacid=26989612)	Potri.004G119700	-365	58.5	0.5	117
Chr02	20091038	20091094	Chr02-21	17152.4	0.694	+	Intergenic	Potri.002G217400	-10861	4090.5	35	116.871	GO:0003676	AT3G45630.1	RNA binding (RRM/RBD/RNP motifs) family protein
Chr01	42016624	42016680	Chr01-17	1343.1	0.657	+	promoter-TSS (ID=Potri.001G399100.1.v3.0.exon.1;Parent=Potri.001G399100.1.v3.0;pacid=27045398)	Potri.001G399100	-212	292	2.5	116.8		AT2G01050.1	zinc ion binding;nucleic acid binding
scaffold_112	106864	106920	scaffold_112-1	2022	0.643	+	Intergenic	Potri.T090700	3039	466	4	116.5	GO:0005524,GO:0016887,GO:0042626,GO:0006810,GO:0055085,GO:0016021	AT3G28860.1	ATP binding cassette subfamily B19
Chr07	13887998	13888054	Chr07-6	2089.9	0.71	+	TTS (ID=Potri.007G119300.2.v3.0.exon.16;Parent=Potri.007G119300.2.v3.0;pacid=27015237)	Potri.007G119300	489	464.5	4	116.125
scaffold_33	92168	92224	scaffold_33-1	999.4	0.735	+	Intergenic	Potri.T031700	70789	232	2	116	GO:0003677,GO:0008270,GO:0006355	AT5G60850.1	OBF binding protein 4
Chr09	7779379	7779435	Chr09-72	265.2	0.646	+	TTS (ID=Potri.009G082000.1.v3.0.exon.1;Parent=Potri.009G082000.1.v3.0;pacid=26986622)	Potri.009G082100	1697	58	0.5	116
Chr16	7723831	7723887	Chr16-79	261	0.663	+	Intergenic	Potri.016G092500	12812	58	0.5	116	GO:0006427,GO:0006412,GO:0005737,GO:0005524,GO:0004821,GO:0000166,GO:0004812	AT3G02760.1	Class II aaRS and biotin synthetases superfamily protein
Chr05	19252375	19252431	Chr05-194	258.9	0.668	+	promoter-TSS (ID=Potri.005G176600.4.v3.0.exon.11;Parent=Potri.005G176600.4.v3.0;pacid=27031856)	Potri.005G176600	-32	58	0.5	116	GO:0006284,GO:0004844	AT3G18630.1	uracil dna glycosylase
Chr09	3162651	3162707	Chr09-74	256.7	0.645	+	Intergenic	Potri.009G019900	1234	58	0.5	116	GO:0003723	AT4G29750.1	CRS1 / YhbY (CRM) domain-containing protein
Chr04	13630270	13630326	Chr04-109	252.5	0.789	+	promoter-TSS (ID=Potri.004G128400.1.v3.0.exon.1;Parent=Potri.004G128400.1.v3.0;pacid=26989610)	Potri.004G128400	-256	58	0.5	116		AT5G43822.1	Pentatricopeptide repeat (PPR) superfamily protein
Chr11	13155335	13155391	Chr11-101	248.2	0.69	+	Intergenic	Potri.011G108100	-3902	58	0.5	116	GO:0003676	AT3G02920.1	Replication protein A, subunit RPA32
Chr10	338200	338256	Chr10-26	742.6	0.651	+	promoter-TSS (ID=Potri.010G003800.3.v3.0.exon.2;Parent=Potri.010G003800.3.v3.0;pacid=26980614)	Potri.010G003800	-91	173.5	1.5	115.667	GO:0003723	AT1G71720.1	Nucleic acid-binding proteins superfamily
Chr14	12273752	12273808	Chr14-10	1841.7	0.638	+	promoter-TSS (ID=Potri.014G157500.2.v3.0.exon.1;Parent=Potri.014G157500.2.v3.0;pacid=27034702)	Potri.014G157500	-9	404	3.5	115.429	GO:0003677,GO:0004003,GO:0005524,GO:0006260	AT1G08840.1	DNA replication helicase, putative
Chr01	37445981	37446037	Chr01-74	500.7	0.758	+	promoter-TSS (ID=Potri.001G362100.1.v3.0.exon.4;Parent=Potri.001G362100.1.v3.0;pacid=27047350)	Potri.001G362100	161	115	1	115
Chr04	11300178	11300234	Chr04-38	494.4	0.776	+	promoter-TSS (ID=Potri.004G120500.1.v3.0.exon.1;Parent=Potri.004G120500.1.v3.0;pacid=26992462)	Potri.004G120500	-169	115	1	115	GO:0030528,GO:0006355	AT1G32640.1	Basic helix-loop-helix (bHLH) DNA-binding family protein
Chr12	11422396	11422452	Chr12-88	256.7	0.656	+	promoter-TSS (ID=Potri.012G087300.1.v3.0.exon.1;Parent=Potri.012G087300.1.v3.0;pacid=27050409)	Potri.012G087300	-466	57.5	0.5	115	GO:0010333,GO:0016829,GO:0008152,GO:0000287	AT1G61680.1	terpene synthase 14
Chr01	47568066	47568122	Chr01-217	248.2	0.63	+	Intergenic	Potri.001G443900	-17902	57.5	0.5	115	GO:0046872,GO:0030001	AT4G16380.1	Heavy metal transport/detoxification superfamily protein
Chr16	8098666	8098722	Chr16-75	246.1	0.663	+	TTS (ID=Potri.016G093800.1.v3.0.exon.2;Parent=Potri.016G093800.1.v3.0;pacid=27012647)	Potri.016G093800	1165	57.5	0.5	115
Chr06	14116576	14116632	Chr06-163	244	0.811	+	Intergenic	Potri.006G156000	-19170	57.5	0.5	115	GO:0031072,GO:0051082,GO:0006457	AT2G22360.1	DNAJ heat shock family protein
Chr05	13687870	13687926	Chr05-29	980.3	0.807	+	Intergenic	Potri.005G151000	2143	228.5	2	114.25		AT4G02160.1
Chr05	12400953	12401009	Chr05-35	768.1	0.647	+	Intergenic	Potri.005G144800	-5802	171	1.5	114
Chr19	3517307	3517363	Chr19-42	256.7	0.663	+	Intergenic	Potri.019G031300	1641	57	0.5	114	GO:0005515	AT1G78230.1	Outer arm dynein light chain 1 protein
Chr02	15502708	15502764	Chr02-168	244	0.686	+	TTS (ID=Potri.002G193900.2.v3.0.exon.5;Parent=Potri.002G193900.2.v3.0;pacid=27022100)	Potri.002G193900	566	57	0.5	114	GO:0005515	AT5G20900.1	jasmonate-zim-domain protein 12
Chr09	4290880	4290936	Chr09-104	241.9	0.715	+	promoter-TSS (ID=Potri.009G032600.1.v3.0.exon.1;Parent=Potri.009G032600.1.v3.0;pacid=26986949)	Potri.009G032600	-991	57	0.5	114
Chr02	15984397	15984453	Chr02-15	973.9	0.66	+	promoter-TSS (ID=Potri.002G199100.1.v3.0.exon.1;Parent=Potri.002G199100.1.v3.0;pacid=27024731)	Potri.002G199100	-567	227.5	2	113.75		AT2G38120.1	Transmembrane amino acid transporter family protein
Chr04	1191042	1191098	Chr04-4	1529.8	0.795	+	Intergenic	Potri.004G018000	-1676	341	3	113.667	GO:0005515	AT1G29740.1	Leucine-rich repeat transmembrane protein kinase
Chr01	21776036	21776092	Chr01-80	481.6	0.814	+	promoter-TSS (ID=Potri.001G214800.1.v3.0.exon.1;Parent=Potri.001G214800.1.v3.0;pacid=27041309)	Potri.001G214800	-10	113.5	1	113.5	GO:0006950	AT2G21620.1	Adenine nucleotide alpha hydrolases-like superfamily protein
Chr11	4719299	4719355	Chr11-13	999.4	0.723	+	Intergenic	Potri.011G054300	3325	226.5	2	113.25
Chr15	11700673	11700729	Chr15-55	500.7	0.663	+	promoter-TSS (ID=Potri.015G096700.1.v3.0.exon.1;Parent=Potri.015G096700.1.v3.0;pacid=27017649)	Potri.015G096600	-39	113	1	113	GO:0005515	AT1G31340.1	related to ubiquitin 1
Chr11	7688408	7688464	Chr11-75	481.6	0.736	+	promoter-TSS (ID=Potri.011G077700.3.v3.0.exon.1;Parent=Potri.011G077700.3.v3.0;pacid=27002442)	Potri.011G077700	359	113	1	113	GO:0003700,GO:0008270,GO:0043565,GO:0006355	AT5G66320.1	GATA transcription factor 5
Chr06	12732478	12732534	Chr06-136	471	0.779	+	Intergenic	Potri.006G147900	-6508	112.5	1	112.5		AT2G31280.3	conserved peptide upstream open reading frame 7
Chr18	16771523	16771579	Chr18-30	1788.6	0.785	+	promoter-TSS (ID=Potri.018G149500.1.v3.0.exon.12;Parent=Potri.018G149500.1.v3.0;pacid=27009463)	Potri.018G149500	54	393	3.5	112.286		AT2G40475.1
Chr08	10442492	10442548	Chr08-90	258.9	0.615	+	promoter-TSS (ID=Potri.008G154100.1.v3.0.exon.1;Parent=Potri.008G154100.1.v3.0;pacid=27038055)	Potri.008G154100	-177	56	0.5	112	GO:0006281,GO:0006355,GO:0000439,GO:0016251	AT1G18340.1	basal transcription factor complex subunit-related
Chr01	41544554	41544610	Chr01-228	246.1	0.654	+	Intergenic	Potri.001G395500	-22638	56	0.5	112
Chr08	4978003	4978059	Chr08-1	4784.6	0.82	+	Intergenic	Potri.008G079800	2665	1117.5	10	111.75
Chr05	9098763	9098819	Chr05-106	481.6	0.766	+	promoter-TSS (ID=Potri.005G117600.1.v3.0.exon.1;Parent=Potri.005G117600.1.v3.0;pacid=27030776)	Potri.005G117600	-899	111	1	111		AT2G32280.1	Protein of unknown function (DUF1218)
Chr09	5851016	5851072	Chr09-48	477.4	0.575	+	Intergenic	Potri.009G054800	-2687	111	1	111	GO:0046872	AT1G29800.1	RING/FYVE/PHD-type zinc finger family protein
Chr01	46641084	46641140	Chr01-219	252.5	0.58	+	Intergenic	Potri.001G435000	9666	55.5	0.5	111		AT5G66230.1	Chalcone-flavanone isomerase family protein
Chr04	20419783	20419839	Chr04-148	244	0.67	+	promoter-TSS (ID=Potri.004G189200.1.v3.0.exon.5;Parent=Potri.004G189200.1.v3.0;pacid=26989201)	Potri.004G189200	101	55.5	0.5	111	GO:0003723	AT1G53120.1	RNA-binding S4 domain-containing protein
Chr04	5146766	5146822	Chr04-143	235.5	0.718	+	promoter-TSS (ID=Potri.004G062300.1.v3.0.exon.1;Parent=Potri.004G062300.1.v3.0;pacid=26991382)	Potri.004G062300	-506	55.5	0.5	111		AT5G65290.1	LMBR1-like membrane protein
Chr08	4952719	4952775	Chr08-47	507.1	0.681	+	promoter-TSS (ID=Potri.008G079500.1.v3.0.exon.1;Parent=Potri.008G079500.1.v3.0;pacid=27039025)	Potri.008G079500	-945	110.5	1	110.5	GO:0005515
Chr18	14416206	14416262	Chr18-14	706.5	0.814	+	promoter-TSS (ID=Potri.018G120100.1.v3.0.exon.1;Parent=Potri.018G120100.1.v3.0;pacid=27011192)	Potri.018G120100	-252	165.5	1.5	110.333	GO:0005506,GO:0009055,GO:0016705,GO:0020037,GO:0055114	AT3G13730.1	cytochrome P450, family 90, subfamily D, polypeptide 1
Chr15	14208933	14208989	Chr15-11	999.4	0.644	+	TTS (ID=Potri.015G131300.1.v3.0.exon.1;Parent=Potri.015G131300.1.v3.0;pacid=27017473)	Potri.015G131300	1211	220	2	110
Chr15	2555175	2555231	Chr15-95	258.9	0.606	+	TTS (ID=Potri.015G031600.1.v3.0.exon.6;Parent=Potri.015G031600.1.v3.0;pacid=27017317)	Potri.015G031600	261	55	0.5	110		AT4G13520.1	small acidic protein 1
Chr10	12399053	12399109	Chr10-56	471	0.742	+	Intergenic	Potri.010G102900	-1184	109.5	1	109.5	GO:0004748,GO:0009186,GO:0055114	AT3G27060.1	Ferritin/ribonucleotide reductase-like family protein
Chr04	20144443	20144499	Chr04-40	5862.4	0.779	+	promoter-TSS (ID=Potri.004G185500.1.v3.0.exon.2;Parent=Potri.004G185500.1.v3.0;pacid=26991765)	Potri.004G185500	71	1474.5	13.5	109.222		AT3G02150.2	plastid transcription factor 1
Chr10	20464553	20464609	Chr10-174	246.1	0.65	+	Intergenic	Potri.010G218600	-2801	54.5	0.5	109		AT5G28780.1	PIF1 helicase
Chr04	1266896	1266952	Chr04-169	239.8	0.753	+	Intergenic	Potri.004G019100	-1011	54.5	0.5	109		AT4G16790.1	hydroxyproline-rich glycoprotein family protein
Chr08	654624	654680	Chr08-130	235.5	0.798	+	promoter-TSS (ID=Potri.008G011800.4.v3.0.exon.3;Parent=Potri.008G011800.4.v3.0;pacid=27035857)	Potri.008G011800	73	54.5	0.5	109		AT4G18540.1
Chr09	4757956	4758012	Chr09-1	13004.3	0.857	+	promoter-TSS (ID=Potri.009G039700.1.v3.0.exon.1;Parent=Potri.009G039700.1.v3.0;pacid=26987948)	Potri.009G039700	-243	3045	28	108.75	GO:0004672,GO:0005524,GO:0006468	AT1G66920.2	Protein kinase superfamily protein
Chr11	11212761	11212817	Chr11-1	3717.3	0.816	+	Intergenic	Potri.011G092500	-5657	869.5	8	108.688	GO:0003677,GO:0006355	AT4G33280.1	AP2/B3-like transcriptional factor family protein
Chr01	39788770	39788826	Chr01-11	1905.3	0.779	+	Intergenic	Potri.001G382200	4863	434.5	4	108.625	GO:0003824,GO:0008152	AT2G43180.1	Phosphoenolpyruvate carboxylase family protein
Chr03	7668371	7668427	Chr03-39	929.3	0.702	+	promoter-TSS (ID=Potri.003G051700.1.v3.0.exon.2;Parent=Potri.003G051700.1.v3.0;pacid=26998223)	Potri.003G051700	-749	217	2	108.5	GO:0016874,GO:0003989,GO:0006633,GO:0009317	AT2G38040.1	acetyl Co-enzyme a carboxylase carboxyltransferase alpha subunit
Chr11	13589776	13589832	Chr11-6	17625.5	0.648	+	Intergenic	Potri.011G110900	-1660	4555.5	42	108.464		AT4G18570.1	Tetratricopeptide repeat (TPR)-like superfamily protein
Chr17	2090125	2090181	Chr17-12	954.8	0.712	+	Intergenic	Potri.017G023700	14612	216	2	108	GO:0003677,GO:0006352,GO:0005634,GO:0051090,GO:0016986,GO:0003702	AT1G04950.1	TATA BOX ASSOCIATED FACTOR II 59
Chr19	11172674	11172730	Chr19-51	254.6	0.679	+	Intergenic	Potri.019G077900	-1953	54	0.5	108	GO:0016020	AT5G33320.1	Glucose-6-phosphate/phosphate translocator-related
Chr05	21108558	21108614	Chr05-172	246.1	0.614	+	promoter-TSS (ID=Potri.005G194000.1.v3.0.exon.1;Parent=Potri.005G194000.1.v3.0;pacid=27028217)	Potri.005G194000	-529	54	0.5	108		AT5G53620.1
Chr15	15249348	15249404	Chr15-109	233.4	0.78	+	promoter-TSS (ID=Potri.015G148100.1.v3.0.exon.2;Parent=Potri.015G148100.1.v3.0;pacid=27018769)	Potri.015G148100	127	54	0.5	108	GO:0003676	AT3G23900.1	RNA recognition motif (RRM)-containing protein
Chr17	3668178	3668234	Chr17-16	2813.5	0.694	+	promoter-TSS (ID=Potri.017G043700.1.v3.0.exon.2;Parent=Potri.017G043700.1.v3.0;pacid=26983746)	Potri.017G043700	-88	647	6	107.833		AT5G64460.1	Phosphoglycerate mutase family protein
Chr01	29823336	29823392	Chr01-193	473.2	0.766	+	promoter-TSS (ID=Potri.001G293000.1.v3.0.exon.1;Parent=Potri.001G293000.1.v3.0;pacid=27044573)	Potri.001G293000	-324	107.5	1	107.5	GO:0000156,GO:0000160,GO:0006355,GO:0000155,GO:0007165,GO:0016020,GO:0005524	AT2G01830.2	CHASE domain containing histidine kinase protein
Chr11	12736670	12736726	Chr11-43	460.4	0.804	+	Intergenic	Potri.011G104300	4231	107.5	1	107.5	GO:0016020	AT1G58520.1	lipases;hydrolases, acting on ester bonds
Chr13	2438429	2438485	Chr13-55	458.3	0.643	+	Intergenic	Potri.013G036200	1741	107	1	107		AT2G26920.1	Ubiquitin-associated/translation elongation factor EF1B protein
Chr02	8463173	8463229	Chr02-158	256.7	0.735	+	promoter-TSS (ID=Potri.002G113300.1.v3.0.exon.3;Parent=Potri.002G113300.1.v3.0;pacid=27020922)	Potri.002G113300	-84	53.5	0.5	107	GO:0005515	AT1G04300.1	TRAF-like superfamily protein
Chr02	16715906	16715962	Chr02-165	220.7	0.892	+	Intergenic	Potri.002G204400	-2429	53.5	0.5	107		AT3G15030.1	TCP family transcription factor 4
Chr10	16390058	16390114	Chr10-43	2713.7	0.771	+	promoter-TSS (ID=Potri.010G156800.1.v3.0.exon.2;Parent=Potri.010G156800.1.v3.0;pacid=26982756)	Potri.010G156800	-457	692	6.5	106.462	GO:0000156,GO:0000160,GO:0006355,GO:0003677	AT1G67710.1	response regulator 11
Chr18	4413705	4413761	Chr18-72	244	0.587	+	promoter-TSS (ID=Potri.018G047100.1.v3.0.exon.5;Parent=Potri.018G047100.1.v3.0;pacid=27010823)	Potri.018G047100	58	53	0.5	106		AT1G73760.1	RING/U-box superfamily protein
Chr05	12349663	12349719	Chr05-149	241.9	0.649	+	Intergenic	Potri.005G144400	1289	53	0.5	106		AT1G11915.1
Chr17	16042829	16042885	Chr17-72	239.8	0.645	+	TTS (ID=Potri.017G155000.1.v3.0.exon.7;Parent=Potri.017G155000.1.v3.0;pacid=26983525)	Potri.017G155000	1246	53	0.5	106		AT1G03360.1	ribosomal RNA processing 4
Chr01	30572009	30572065	Chr01-230	231.3	0.692	+	TTS (ID=Potri.001G301800.1.v3.0.exon.2;Parent=Potri.001G301800.1.v3.0;pacid=27040606)	Potri.001G301800	290	53	0.5	106	GO:0005524,GO:0016887,GO:0042626,GO:0006810,GO:0055085,GO:0016021	AT1G27940.1	P-glycoprotein 13
Chr15	11161902	11161958	Chr15-13	1014.2	0.695	+	promoter-TSS (ID=Potri.015G089200.1.v3.0.exon.2;Parent=Potri.015G089200.1.v3.0;pacid=27018912)	Potri.015G089200	170	211	2	105.5		AT3G19330.1	Protein of unknown function (DUF677)
Chr06	10992783	10992839	Chr06-74	483.8	0.641	+	TTS (ID=Potri.006G133500.2.v3.0.exon.9;Parent=Potri.006G133500.2.v3.0;pacid=27006889)	Potri.006G133500	421	105.5	1	105.5	GO:0004190,GO:0006508	AT1G49050.1	Eukaryotic aspartyl protease family protein
Chr17	6088444	6088500	Chr17-29	471	0.624	+	promoter-TSS (ID=Potri.017G063900.1.v3.0.exon.2;Parent=Potri.017G063900.1.v3.0;pacid=26984811)	Potri.017G063900	31	105.5	1	105.5	GO:0005515,GO:0008565,GO:0006606,GO:0005634,GO:0005737,GO:0006886,GO:0005643	AT3G06720.1	importin alpha isoform 1
Chr15	705107	705163	Chr15-18	2276.7	0.687	+	Intergenic	Potri.015G010600	1440	579.5	5.5	105.364		AT3G17700.1	cyclic nucleotide-binding transporter 1
Chr11	552615	552671	Chr11-18	914.5	0.661	+	TTS (ID=Potri.011G007200.1.v3.0.exon.1;Parent=Potri.011G007200.1.v3.0;pacid=27001175)	Potri.011G007200	460	210.5	2	105.25
Chr06	6245158	6245214	Chr06-14	9791.9	0.692	+	promoter-TSS (ID=Potri.006G082800.1.v3.0.exon.1;Parent=Potri.006G082800.1.v3.0;pacid=27005182)	Potri.006G082800	93	2262.5	21.5	105.233	GO:0030528,GO:0006355	AT5G08130.2	basic helix-loop-helix (bHLH) DNA-binding superfamily protein
Chr07	13123496	13123552	Chr07-2	4576.6	0.784	+	promoter-TSS (ID=Potri.007G107400.4.v3.0.exon.8;Parent=Potri.007G107400.4.v3.0;pacid=27015658)	Potri.007G107400	-158	1051	10	105.1		AT5G05660.1	sequence-specific DNA binding transcription factors;zinc ion binding;sequence-specific DNA binding transcription factors
Chr07	13896148	13896204	Chr07-15	681.1	0.796	+	Intergenic	Potri.007G119400	3608	157.5	1.5	105	GO:0000166,GO:0004820,GO:0005524,GO:0006426,GO:0005737,GO:0006412	AT3G48110.1	glycine-tRNA ligases
Chr02	7027516	7027572	Chr02-157	449.8	0.751	+	Intergenic	Potri.002G097500	-1350	105	1	105		AT4G03510.1	RING membrane-anchor 1
Chr06	26018622	26018678	Chr06-119	447.7	0.71	+	TTS (ID=Potri.006G255400.3.v3.0.exon.9;Parent=Potri.006G255400.3.v3.0;pacid=27006738)	Potri.006G255400	855	105	1	105	GO:0003700,GO:0006355	AT1G24590.1	DORNROSCHEN-like
Chr03	9448861	9448917	Chr03-147	244	0.665	+	Intergenic	Potri.003G066200	2012	52.5	0.5	105	GO:0005215,GO:0006810,GO:0055085,GO:0016021	AT5G19600.1	sulfate transporter 3;5
Chr07	8318411	8318467	Chr07-137	237.6	0.715	+	Intergenic	Potri.007G065500	-11587	52.5	0.5	105		AT5G48370.2	Thioesterase/thiol ester dehydrase-isomerase superfamily protein
Chr01	5421623	5421679	Chr01-308	233.4	0.739	+	Intergenic	Potri.001G068000	-4609	52.5	0.5	105		AT4G33470.1	histone deacetylase 14
Chr01	5336993	5337049	Chr01-242	222.8	0.734	+	Intergenic	Potri.001G067200	-1416	52.5	0.5	105	GO:0004672,GO:0005524,GO:0006468,GO:0005515	AT3G56370.1	Leucine-rich repeat protein kinase family protein
Chr12	8384420	8384476	Chr12-18	9709.2	0.739	+	TTS (ID=Potri.012G065000.1.v3.0.exon.9;Parent=Potri.012G065000.1.v3.0;pacid=27049517)	Potri.012G065000	306	2362	22.5	104.978		AT1G66140.1	zinc finger protein 4
Chr01	32792152	32792208	Chr01-23	9465.2	0.635	+	Intergenic	Potri.001G323800	-3151	2202.5	21	104.881		AT4G35920.1	PLAC8 family protein
Chr18	15162536	15162592	Chr18-5	9335.8	0.677	+	Intergenic	Potri.018G129800	3031	2089	20	104.45		AT2G39870.1
Chr06	16264374	16264430	Chr06-65	454.1	0.689	+	Intergenic	Potri.006G163100	-2974	104	1	104	GO:0004177,GO:0006508,GO:0005622	AT4G30920.1	Cytosol aminopeptidase family protein
Chr04	3024330	3024386	Chr04-129	224.9	0.727	+	Intergenic	Potri.004G039900	-4112	52	0.5	104	GO:0031072	AT4G12780.1	Chaperone DnaJ-domain superfamily protein
Chr12	9966691	9966747	Chr12-97	220.7	0.752	+	Intergenic	Potri.012G074500	-3717	52	0.5	104		AT1G08790.1	Protein of unknown function (DUF1685)
Chr10	16702744	16702800	Chr10-146	220.7	0.718	+	Intergenic	Potri.010G162000	-1727	52	0.5	104	GO:0004553,GO:0005975	AT3G57270.1	beta-1,3-glucanase 1
Chr02	6650611	6650667	Chr02-96	481.6	0.762	+	promoter-TSS (ID=Potri.002G092900.1.v3.0.exon.1;Parent=Potri.002G092900.1.v3.0;pacid=27022046)	Potri.002G092900	-66	103.5	1	103.5	GO:0004221,GO:0006511	AT5G22030.1	ubiquitin-specific protease 8
Chr06	19826715	19826771	Chr06-104	451.9	0.631	+	promoter-TSS (ID=Potri.006G184500.1.v3.0.exon.1;Parent=Potri.006G184500.1.v3.0;pacid=27008272)	Potri.006G184500	-295	103.5	1	103.5	GO:0004672,GO:0005524,GO:0006468,GO:0048544,GO:0005529,GO:0004674	AT4G27290.1	S-locus lectin protein kinase family protein
Chr19	13790015	13790071	Chr19-12	1107.6	0.633	+	TTS (ID=Potri.019G109400.2.v3.0.exon.1;Parent=Potri.019G109400.2.v3.0;pacid=27025329)	Potri.019G109400	929	258.5	2.5	103.4		AT3G02910.1	AIG2-like (avirulence induced gene) family protein
Chr01	43011904	43011960	Chr01-48	664.1	0.681	+	Intergenic	Potri.001G407600	13607	155	1.5	103.333	GO:0005524	AT1G73110.1	P-loop containing nucleoside triphosphate hydrolases superfamily protein
Chr01	10390335	10390391	Chr01-89	908.1	0.643	+	TTS (ID=Potri.001G128300.1.v3.0.exon.1;Parent=Potri.001G128300.1.v3.0;pacid=27042562)	Potri.001G128200	174	206.5	2	103.25		AT5G06300.1	Putative lysine decarboxylase family protein
Chr18	7204279	7204335	Chr18-4	1341	0.779	+	Intergenic	Potri.018G061200	11659	309.5	3	103.167	GO:0016021	AT5G18520.1	Lung seven transmembrane receptor family protein
Chr01	41725225	41725281	Chr01-83	1468.3	0.761	+	Intergenic	Potri.001G396400	-11935	360.5	3.5	103	GO:0005515	AT5G24320.1	Transducin/WD40 repeat-like superfamily protein
Chr13	12872021	12872077	Chr13-18	657.7	0.777	+	promoter-TSS (ID=Potri.013G115300.4.v3.0.exon.1;Parent=Potri.013G115300.4.v3.0;pacid=26993911)	Potri.013G115300	-882	154.5	1.5	103	GO:0007165,GO:0006355,GO:0005634,GO:0004871,GO:0003700	AT1G78540.1	SH2 domain protein B
Chr19	11691921	11691977	Chr19-59	241.9	0.715	+	TTS (ID=Potri.019G084100.1.v3.0.exon.3;Parent=Potri.019G084100.1.v3.0;pacid=27025456)	Potri.019G084100	909	51.5	0.5	103	GO:0003824,GO:0005992	AT5G51460.2	Haloacid dehalogenase-like hydrolase (HAD) superfamily protein
Chr05	5231601	5231657	Chr05-155	235.5	0.673	+	promoter-TSS (ID=Potri.005G072100.2.v3.0.exon.9;Parent=Potri.005G072100.2.v3.0;pacid=27030568)	Potri.005G072100	-72	51.5	0.5	103	GO:0005506,GO:0009055,GO:0016705,GO:0020037,GO:0055114	AT2G26710.1	Cytochrome P450 superfamily protein
Chr12	12857999	12858055	Chr12-80	227	0.779	+	Intergenic	Potri.012G104400	-3947	51.5	0.5	103	GO:0016763	AT2G40570.1	initiator tRNA phosphoribosyl transferase family protein
Chr05	17140650	17140706	Chr05-166	222.8	0.683	+	Intergenic	Potri.005G165300	-19170	51.5	0.5	103	GO:0005515,GO:0004871,GO:0009416	AT5G67385.1	Phototropic-responsive NPH3 family protein
Chr08	9723227	9723283	Chr08-113	220.7	0.721	+	TTS (ID=Potri.008G144600.1.v3.0.exon.3;Parent=Potri.008G144600.1.v3.0;pacid=27037559)	Potri.008G144600	1190	51.5	0.5	103	GO:0009055,GO:0015035,GO:0045454	AT5G14070.1	Thioredoxin superfamily protein
Chr09	5205129	5205185	Chr09-10	7383.7	0.629	+	promoter-TSS (ID=Potri.009G046600.1.v3.0.exon.3;Parent=Potri.009G046600.1.v3.0;pacid=26987663)	Potri.009G046600	-220	1645.5	16	102.844	GO:0004672,GO:0005524,GO:0006468,GO:0005488	AT5G01550.1	lectin receptor kinase a4.1
Chr08	10089605	10089661	Chr08-14	1084.2	0.666	+	Intergenic	Potri.008G149500	6337	257	2.5	102.8	GO:0003676,GO:0008270	AT3G10400.1	RNA recognition motif and CCHC-type zinc finger domains containing protein
Chr03	15961468	15961524	Chr03-14	6507.5	0.646	+	TTS (ID=Potri.003G143000.1.v3.0.exon.5;Parent=Potri.003G143000.1.v3.0;pacid=26996651)	Potri.003G143000	721	1540	15	102.667	GO:0005515	AT5G42400.1	SET domain protein 25
Chr09	12454861	12454917	Chr09-16	3276	0.667	+	promoter-TSS (ID=Potri.009G161900.1.v3.0.exon.2;Parent=Potri.009G161900.1.v3.0;pacid=26985828)	Potri.009G162000	11	718.5	7	102.643	GO:0016021	AT3G23430.1	phosphate 1
Chr06	26338207	26338263	Chr06-7	1801.4	0.662	+	promoter-TSS (ID=Potri.006G260000.1.v3.0.exon.1;Parent=Potri.006G260000.1.v3.0;pacid=27004972)	Potri.006G260000	-76	410	4	102.5	GO:0005215,GO:0006857,GO:0016020	AT1G52190.1	Major facilitator superfamily protein
Chr13	11708071	11708127	Chr13-2	2092.1	0.873	+	Intergenic	Potri.013G103500	-5035	460	4.5	102.222	GO:0005515	AT4G15180.1	SET domain protein 2
Chr14	14984582	14984638	Chr14-4	1835.3	0.811	+	Intergenic	Potri.014G180200	-18159	408.5	4	102.125	GO:0008964,GO:0006099,GO:0015977	AT1G68750.1	phosphoenolpyruvate carboxylase 4
Chr18	11290907	11290963	Chr18-95	233.4	0.68	+	promoter-TSS (ID=Potri.018G085900.1.v3.0.exon.2;Parent=Potri.018G085900.1.v3.0;pacid=27010150)	Potri.018G085900	97	51	0.5	102	GO:0043531,GO:0006915,GO:0005524	AT3G14460.1	LRR and NB-ARC domains-containing disease resistance protein
Chr01	38964158	38964214	Chr01-256	222.8	0.658	+	Intergenic	Potri.001G375000	-6768	51	0.5	102		AT4G24090.1
Chr10	20220874	20220930	Chr10-218	220.7	0.863	+	promoter-TSS (ID=Potri.010G214900.1.v3.0.exon.2;Parent=Potri.010G214900.1.v3.0;pacid=26980719)	Potri.010G214900	-259	51	0.5	102	GO:0016787,GO:0008152	AT4G20070.1	allantoate amidohydrolase
Chr09	12884998	12885054	Chr09-91	218.5	0.772	+	Intergenic	Potri.009G170000	-1157	51	0.5	102	GO:0004672,GO:0005524,GO:0006468,GO:0005515	AT1G56130.1	Leucine-rich repeat transmembrane protein kinase
Chr04	686439	686495	Chr04-122	218.5	0.705	+	Intergenic	Potri.004G010900	2597	51	0.5	102		AT1G61260.1	Protein of unknown function (DUF761)
scaffold_34	203682	203738	scaffold_34-2	214.3	0.743	+	Intergenic	Potri.T032600	-21223	51	0.5	102		AT3G14172.1
Chr02	13850940	13850996	Chr02-61	1417.3	0.699	+	Intergenic	Potri.002G178700	-12802	356.5	3.5	101.857	GO:0004672,GO:0005524,GO:0006468	AT2G36350.1	Protein kinase superfamily protein
Chr04	6952071	6952127	Chr04-3	9615.8	0.811	+	Intergenic	Potri.004G084100	-8561	2239.5	22	101.795	GO:0016747	AT5G41120.1	Esterase/lipase/thioesterase family protein
Chr12	196793	196849	Chr12-61	863.6	0.864	+	Intergenic	Potri.012G002100	-2706	203.5	2	101.75		AT1G48120.1	hydrolases;protein serine/threonine phosphatases
Chr01	22867231	22867287	Chr01-99	439.2	0.706	+	Intergenic	Potri.001G221700	-2911	101.5	1	101.5	GO:0003723	AT2G25970.1	KH domain-containing protein
Chr01	12493259	12493315	Chr01-2	4646.7	0.754	+	Intergenic	Potri.001G151400	1985	1065.5	10.5	101.476	GO:0016998	AT1G21880.2	lysm domain GPI-anchored protein 1 precursor
Chr02	19895513	19895569	Chr02-26	880.5	0.621	+	promoter-TSS (ID=Potri.002G216200.1.v3.0.exon.5;Parent=Potri.002G216200.1.v3.0;pacid=27024792)	Potri.002G216200	-86	202.5	2	101.25
Chr12	13310895	13310951	Chr12-15	1088.5	0.657	+	promoter-TSS (ID=Potri.012G111200.1.v3.0.exon.1;Parent=Potri.012G111200.1.v3.0;pacid=27050887)	Potri.012G111200	-565	253	2.5	101.2	GO:0006355,GO:0005634	AT5G43700.1	AUX/IAA transcriptional regulator family protein
Chr01	18253196	18253252	Chr01-123	702.3	0.67	+	Intergenic	Potri.001G195700	-1730	151.5	1.5	101		AT4G31430.2
Chr17	11357057	11357113	Chr17-42	449.8	0.675	+	promoter-TSS (ID=Potri.017G096100.1.v3.0.exon.1;Parent=Potri.017G096100.1.v3.0;pacid=26985306)	Potri.017G096100	-486	101	1	101	GO:0019904	AT1G26480.1	general regulatory factor 12
Chr19	9415579	9415635	Chr19-57	231.3	0.747	+	Intergenic	Potri.019G061600	-1628	50.5	0.5	101	GO:0003677	AT1G57560.1	myb domain protein 50
Chr16	10418920	10418976	Chr16-86	227	0.945	+	TTS (ID=Potri.016G104700.1.v3.0.exon.18;Parent=Potri.016G104700.1.v3.0;pacid=27012593)	Potri.016G104700	741	50.5	0.5	101	GO:0000166,GO:0004812,GO:0005524,GO:0006418,GO:0005737,GO:0006412,GO:0006438,GO:0004832	AT5G16715.1	ATP binding;valine-tRNA ligases;aminoacyl-tRNA ligases;nucleotide binding;ATP binding;aminoacyl-tRNA ligases
Chr04	5776394	5776450	Chr04-138	224.9	0.664	+	Intergenic	Potri.004G069700	2461	50.5	0.5	101	GO:0005515	AT5G35700.1	fimbrin-like protein 2
Chr08	595746	595802	Chr08-124	214.3	0.718	+	TTS (ID=Potri.008G010800.1.v3.0.exon.2;Parent=Potri.008G010800.1.v3.0;pacid=27038957)	Potri.008G010800	931	50.5	0.5	101	GO:0004222,GO:0008270,GO:0006508,GO:0031012	AT1G70170.1	matrix metalloproteinase
Chr03	5131636	5131692	Chr03-1	6119.2	0.682	+	promoter-TSS (ID=Potri.003G038800.1.v3.0.exon.3;Parent=Potri.003G038800.1.v3.0;pacid=26997205)	Potri.003G038800	86	1413	14	100.929	GO:0005337,GO:0006810,GO:0016021,GO:0016020	AT1G70330.1	equilibrative nucleotide transporter 1
Chr05	12165775	12165831	Chr05-7	2204.5	0.693	+	Intergenic	Potri.005G143300	1955	504	5	100.8	GO:0003677,GO:0005634,GO:0008270	AT5G35330.1	methyl-CPG-binding domain protein 02
Chr01	23022700	23022756	Chr01-50	2694.6	0.673	+	Intergenic	Potri.001G222300	-1983	604.5	6	100.75	GO:0003700,GO:0043565,GO:0006355,GO:0003677,GO:0005634	AT2G23760.1	BEL1-like homeodomain 4
Chr16	6629081	6629137	Chr16-4	17141.7	0.729	+	Intergenic	Potri.016G084700	-3964	4026.5	40	100.662	GO:0003677	AT3G16350.1	Homeodomain-like superfamily protein
Chr08	3012845	3012901	Chr08-8	1563.7	0.662	+	Intergenic	Potri.008G051000	3877	350	3.5	100	GO:0045132,GO:0000775,GO:0005634	AT5G04320.2	Shugoshin C terminus
Chr15	2363387	2363443	Chr15-35	435	0.777	+	promoter-TSS (ID=Potri.015G029200.1.v3.0.exon.1;Parent=Potri.015G029200.1.v3.0;pacid=27018450)	Potri.015G029200	-162	100	1	100	GO:0004672,GO:0005524,GO:0006468,GO:0048544,GO:0005529,GO:0004674	AT4G27290.1	S-locus lectin protein kinase family protein
Chr07	5324909	5324965	Chr07-82	222.8	0.752	+	Intergenic	Potri.007G053200	-1201	50	0.5	100
Chr17	2850983	2851039	Chr17-84	214.3	0.717	+	Intergenic	Potri.017G033200	-2120	50	0.5	100	GO:0005515	AT1G29740.1	Leucine-rich repeat transmembrane protein kinase
Chr17	9623117	9623173	Chr17-82	214.3	0.717	+	Intergenic	Potri.017G081700	-12918	50	0.5	100		AT2G18940.1	Tetratricopeptide repeat (TPR)-like superfamily protein
Chr01	2642584	2642640	Chr01-104	664.1	0.639	+	Intergenic	Potri.001G037300	1690	149.5	1.5	99.6667		AT1G32700.1	PLATZ transcription factor family protein
Chr10	243587	243643	Chr10-78	630.2	0.69	+	promoter-TSS (ID=Potri.010G002400.1.v3.0.exon.4;Parent=Potri.010G002400.1.v3.0;pacid=26981022)	Potri.010G002400	-75	149.5	1.5	99.6667	GO:0003824,GO:0008152	AT4G16800.1	ATP-dependent caseinolytic (Clp) protease/crotonase family protein
Chr02	22267816	22267872	Chr02-72	1890.5	0.789	+	TTS (ID=Potri.002G231000.2.v3.0.exon.2;Parent=Potri.002G231000.2.v3.0;pacid=27023237)	Potri.002G231000	257	448	4.5	99.5556		AT3G59390.1
Chr18	13668641	13668697	Chr18-2	2126	0.631	+	Intergenic	Potri.018G110500	-4294	497	5	99.4	GO:0004672,GO:0005524,GO:0006468,GO:0005515	AT2G33170.1	Leucine-rich repeat receptor-like protein kinase family protein
Chr15	3105012	3105068	Chr15-23	982.4	0.747	+	promoter-TSS (ID=Potri.015G035700.1.v3.0.exon.5;Parent=Potri.015G035700.1.v3.0;pacid=27019065)	Potri.015G035700	51	397.5	4	99.375	GO:0005515	AT1G74190.1	receptor like protein 15
Chr17	7047146	7047202	Chr17-20	632.3	0.858	+	promoter-TSS (ID=Potri.017G067100.1.v3.0.exon.4;Parent=Potri.017G067100.1.v3.0;pacid=26984212)	Potri.017G067100	558	149	1.5	99.3333	GO:0030528,GO:0006355	AT3G28857.1	basic helix-loop-helix (bHLH) DNA-binding family protein
Chr06	25750335	25750391	Chr06-34	1570.1	0.781	+	promoter-TSS (ID=Potri.006G251800.2.v3.0.exon.4;Parent=Potri.006G251800.2.v3.0;pacid=27008085)	Potri.006G251800	19	347.5	3.5	99.2857		AT5G38760.1	Late embryogenesis abundant protein (LEA) family protein
Chr01	28587158	28587214	Chr01-19	16588	0.699	+	Intergenic	Potri.001G279400	4145	4168	42	99.2381		AT1G49740.1	PLC-like phosphodiesterases superfamily protein
Chr07	14871420	14871476	Chr07-38	437.1	0.658	+	TTS (ID=Potri.007G136000.1.v3.0.exon.1;Parent=Potri.007G136000.1.v3.0;pacid=27014532)	Potri.007G136000	539	99	1	99	GO:0016788,GO:0006629	AT5G45670.1	GDSL-like Lipase/Acylhydrolase superfamily protein
Chr01	13814076	13814132	Chr01-271	231.3	0.761	+	TTS (ID=Potri.001G164800.3.v3.0.exon.2;Parent=Potri.001G164800.3.v3.0;pacid=27047517)	Potri.001G164800	265	49.5	0.5	99		AT3G50610.1
Chr09	572135	572191	Chr09-90	224.9	0.643	+	Intergenic	Potri.009G001600	-2855	49.5	0.5	99		AT5G06830.1
Chr16	3866757	3866813	Chr16-93	220.7	0.688	+	Intergenic	Potri.016G057600	-4787	49.5	0.5	99	GO:0005515	AT5G61230.1	Ankyrin repeat family protein
Chr01	6766677	6766733	Chr01-288	216.4	0.748	+	promoter-TSS (ID=Potri.001G085500.2.v3.0.exon.1;Parent=Potri.001G085500.2.v3.0;pacid=27042100)	Potri.001G085500	-638	49.5	0.5	99
Chr18	16263150	16263206	Chr18-111	212.2	0.705	+	promoter-TSS (ID=Potri.018G142700.2.v3.0.exon.7;Parent=Potri.018G142700.2.v3.0;pacid=27010157)	Potri.018G142700	-524	49.5	0.5	99	GO:0008649,GO:0006364,GO:0005737	AT5G50110.1	S-adenosyl-L-methionine-dependent methyltransferases superfamily protein
Chr03	7102802	7102858	Chr03-162	210.1	0.831	+	Intergenic	Potri.003G048600	-14719	49.5	0.5	99	GO:0004672,GO:0005524,GO:0006468	AT5G59010.1	Protein kinase protein with tetratricopeptide repeat domain
Chr03	3231508	3231564	Chr03-143	210.1	0.765	+	Intergenic	Potri.003G026700	-1293	49.5	0.5	99	GO:0016881	AT3G57870.1	sumo conjugation enzyme 1
Chr07	9370628	9370684	Chr07-4	1928.7	0.808	+	promoter-TSS (ID=Potri.007G071500.1.v3.0.exon.1;Parent=Potri.007G071500.1.v3.0;pacid=27016375)	Potri.007G071500	-446	445	4.5	98.8889	GO:0005515	AT3G25800.1	protein phosphatase 2A subunit A2
Chr10	14663289	14663345	Chr10-46	1835.3	0.749	+	Intergenic	Potri.010G131800	2004	444.5	4.5	98.7778	GO:0004672,GO:0005524,GO:0006468,GO:0005515	AT4G03390.1	STRUBBELIG-receptor family 3
Chr10	2306475	2306531	Chr10-18	840.2	0.785	+	Intergenic	Potri.010G017500	-2490	197	2	98.5		AT5G02110.1	CYCLIN D7;1
Chr14	6728499	6728555	Chr14-36	437.1	0.701	+	promoter-TSS (ID=Potri.014G085400.2.v3.0.exon.1;Parent=Potri.014G085400.2.v3.0;pacid=27034020)	Potri.014G085400	-78	98.5	1	98.5		AT3G09310.1
Chr02	2499651	2499707	Chr02-76	430.7	0.737	+	promoter-TSS (ID=Potri.002G038800.1.v3.0.exon.2;Parent=Potri.002G038800.1.v3.0;pacid=27023033)	Potri.002G038800	-222	98.5	1	98.5	GO:0008270	AT1G67340.1	HCP-like superfamily protein with MYND-type zinc finger
Chr01	5637236	5637292	Chr01-112	426.5	0.743	+	promoter-TSS (ID=Potri.001G070700.1.v3.0.exon.1;Parent=Potri.001G070700.1.v3.0;pacid=27040702)	Potri.001G070700	-260	98.5	1	98.5	GO:0005515	AT3G24440.1	Fibronectin type III domain-containing protein
Chr06	9446296	9446352	Chr06-46	664.1	0.572	+	promoter-TSS (ID=Potri.006G119400.1.v3.0.exon.3;Parent=Potri.006G119400.1.v3.0;pacid=27003868)	Potri.006G119400	-110	147.5	1.5	98.3333	GO:0022857,GO:0055085,GO:0016021	AT5G18840.1	Major facilitator superfamily protein
Chr03	10900387	10900443	Chr03-33	630.2	0.808	+	promoter-TSS (ID=Potri.003G080800.2.v3.0.exon.1;Parent=Potri.003G080800.2.v3.0;pacid=26998561)	Potri.003G080800	-203	147	1.5	98		AT3G55350.1	PIF / Ping-Pong family of plant transposases
Chr14	14702509	14702565	Chr14-110	220.7	0.685	+	Intergenic	Potri.014G179000	-6496	49	0.5	98		AT5G62910.1	RING/U-box superfamily protein
Chr01	36371335	36371391	Chr01-274	218.5	0.648	+	TTS (ID=Potri.001G355700.1.v3.0.exon.1;Parent=Potri.001G355700.1.v3.0;pacid=27044614)	Potri.001G355700	1343	49	0.5	98	GO:0008565,GO:0006886	AT2G31660.1	ARM repeat superfamily protein
Chr18	3319855	3319911	Chr18-124	216.4	0.763	+	TTS (ID=Potri.018G040100.1.v3.0.exon.1;Parent=Potri.018G040100.1.v3.0;pacid=27009690)	Potri.018G040100	2327	49	0.5	98		AT2G47350.1	HIT zinc finger ;PAPA-1-like conserved region
Chr18	10093003	10093059	Chr18-110	214.3	0.699	+	promoter-TSS (ID=Potri.018G076000.3.v3.0.exon.3;Parent=Potri.018G076000.3.v3.0;pacid=27009302)	Potri.018G076000	-33	49	0.5	98		AT3G25400.1
Chr06	7723438	7723494	Chr06-219	212.2	0.723	+	promoter-TSS (ID=Potri.006G100500.1.v3.0.exon.1;Parent=Potri.006G100500.1.v3.0;pacid=27003778)	Potri.006G100500	-460	49	0.5	98		AT5G19080.1	RING/U-box superfamily protein
Chr16	7273990	7274046	Chr16-89	212.2	0.712	+	promoter-TSS (ID=Potri.016G089600.1.v3.0.exon.1;Parent=Potri.016G089600.1.v3.0;pacid=27013861)	Potri.016G089600	-665	49	0.5	98	GO:0008652,GO:0016597,GO:0008152	AT5G14060.1	Aspartate kinase family protein
Chr10	1842461	1842517	Chr10-6	1676.2	0.783	+	promoter-TSS (ID=Potri.010G014700.2.v3.0.exon.1;Parent=Potri.010G014700.2.v3.0;pacid=26978728)	Potri.010G014700	-310	390	4	97.5	GO:0004672,GO:0005524,GO:0006468,GO:0005515	AT2G26730.1	Leucine-rich repeat protein kinase family protein
Chr13	6669892	6669948	Chr13-60	426.5	0.645	+	Intergenic	Potri.013G077400	-4002	97.5	1	97.5		AT2G20710.1	Tetratricopeptide repeat (TPR)-like superfamily protein
Chr05	6826409	6826465	Chr05-2	5223.8	0.721	+	promoter-TSS (ID=Potri.005G091700.1.v3.0.exon.4;Parent=Potri.005G091700.1.v3.0;pacid=27030098)	Potri.005G091700	-189	1215.5	12.5	97.24		AT4G11850.1	phospholipase D gamma 1
Chr10	8345197	8345253	Chr10-3	2703.1	0.729	+	promoter-TSS (ID=Potri.010G053100.1.v3.0.exon.1;Parent=Potri.010G053100.1.v3.0;pacid=26979184)	Potri.010G053100	-184	632	6.5	97.2308	GO:0004672,GO:0005524,GO:0006468	AT4G23160.1	cysteine-rich RLK (RECEPTOR-like protein kinase) 8
Chr09	3617342	3617398	Chr09-22	617.4	0.67	+	promoter-TSS (ID=Potri.009G024900.1.v3.0.exon.1;Parent=Potri.009G024900.1.v3.0;pacid=26986582)	Potri.009G024900	-62	145.5	1.5	97		AT3G47650.1	DnaJ/Hsp40 cysteine-rich domain superfamily protein
Chr02	3217348	3217404	Chr02-82	424.4	0.734	+	Intergenic	Potri.002G049400	-3375	97	1	97	GO:0003723	AT3G25440.1	RNA-binding CRS1 / YhbY (CRM) domain protein
Chr06	20998980	20999036	Chr06-113	413.7	0.741	+	Intergenic	Potri.006G194800	-3167	97	1	97	GO:0003676,GO:0005622	AT1G30480.1	D111/G-patch domain-containing protein
Chr02	15613885	15613941	Chr02-177	216.4	0.621	+	Intergenic	Potri.002G195100	-1284	48.5	0.5	97	GO:0005515	AT2G35630.1	ARM repeat superfamily protein
Chr08	14447820	14447876	Chr08-133	212.2	0.645	+	Intergenic	Potri.008G202700	1984	48.5	0.5	97	GO:0005524,GO:0016887	AT5G64840.1	general control non-repressible 5
Chr06	7683147	7683203	Chr06-182	205.8	0.766	+	Intergenic	Potri.006G099900	-2472	48.5	0.5	97	GO:0004672,GO:0005524,GO:0006468,GO:0005488	AT3G55550.1	Concanavalin A-like lectin protein kinase family protein
Chr03	2350281	2350337	Chr03-58	432.8	0.789	+	promoter-TSS (ID=Potri.003G019400.2.v3.0.exon.1;Parent=Potri.003G019400.2.v3.0;pacid=26996941)	Potri.003G019400	-606	96.5	1	96.5	GO:0003700,GO:0043565,GO:0006355	AT4G18170.1	WRKY DNA-binding protein 28
Chr11	7347823	7347879	Chr11-53	430.7	0.646	+	Intergenic	Potri.011G075700	18586	96.5	1	96.5		AT2G40095.1	Alpha/beta hydrolase related protein
Chr03	664861	664917	Chr03-61	413.7	0.764	+	exon (ID=Potri.003G008100.1.v3.0.exon.1;Parent=Potri.003G008100.1.v3.0;pacid=26999337, exon 1 of 1)	Potri.003G008100	235	96.5	1	96.5		AT1G62930.1	Tetratricopeptide repeat (TPR)-like superfamily protein
Chr03	2527696	2527752	Chr03-5	3326.9	0.726	+	TTS (ID=Potri.003G021000.1.v3.0.exon.2;Parent=Potri.003G021000.1.v3.0;pacid=26998608)	Potri.003G021000	289	771.5	8	96.4375	GO:0004869	AT3G12490.1	cystatin B
Chr05	3839572	3839628	Chr05-77	1069.4	0.635	+	Intergenic	Potri.005G053700	-4612	241	2.5	96.4		AT2G40650.1	PRP38 family protein
Chr14	3082341	3082397	Chr14-22	615.3	0.603	+	Intergenic	Potri.014G037800	-4617	144	1.5	96
Chr07	793070	793126	Chr07-95	214.3	0.639	+	promoter-TSS (ID=Potri.007G010200.6.v3.0.exon.1;Parent=Potri.007G010200.6.v3.0;pacid=27015643)	Potri.007G010200	-82	48	0.5	96
Chr06	16742522	16742578	Chr06-251	214.3	0.757	+	Intergenic	Potri.006G165400	-2757	48	0.5	96		AT4G27630.2	GPCR-type G protein 2
Chr04	21998289	21998345	Chr04-160	210.1	0.74	+	Intergenic	Potri.004G212200	-3688	48	0.5	96	GO:0006914	AT4G30790.1
Chr05	10485473	10485529	Chr05-47	2113.3	0.678	+	Intergenic	Potri.005G130600	-10384	478	5	95.6
Chr11	6856617	6856673	Chr11-76	477.4	0.656	+	promoter-TSS (ID=Potri.011G071900.1.v3.0.exon.4;Parent=Potri.011G071900.1.v3.0;pacid=27001531)	Potri.011G071900	-441	95.5	1	95.5	GO:0046961,GO:0015991,GO:0033178	AT1G64200.1	vacuolar H+-ATPase subunit E isoform 3
Chr13	12917482	12917538	Chr13-40	418	0.725	+	promoter-TSS (ID=Potri.013G115600.1.v3.0.exon.2;Parent=Potri.013G115600.1.v3.0;pacid=26995231)	Potri.013G115600	-582	95.5	1	95.5	GO:0006412,GO:0005840,GO:0005622,GO:0003735	AT5G23535.1	KOW domain-containing protein
Chr05	6036449	6036505	Chr05-63	1213.6	0.727	+	Intergenic	Potri.005G082000	-5571	285.5	3	95.1667		AT1G67630.1	DNA polymerase alpha 2
scaffold_1661	4544	4600	scaffold_1661-1	1875.6	0.807	+	Intergenic	Potri.T177400	3297	428	4.5	95.1111
Chr18	11511477	11511533	Chr18-12	2507.9	0.645	+	Intergenic	Potri.018G088100	-3598	618	6.5	95.0769
Chr12	4188278	4188334	Chr12-84	443.4	0.843	+	Intergenic	Potri.012G045800	-5006	95	1	95		AT4G34530.1	cryptochrome-interacting basic-helix-loop-helix 1
scaffold_26	102463	102519	scaffold_26-2	426.5	0.639	+	Intergenic	Potri.T016300	-31451	95	1	95		AT4G22660.1	F-box family protein with a domain of unknown function (DUF295)
Chr10	13643858	13643914	Chr10-176	229.2	0.709	+	promoter-TSS (ID=Potri.010G119400.1.v3.0.exon.2;Parent=Potri.010G119400.1.v3.0;pacid=26982837)	Potri.010G119400	101	47.5	0.5	95		AT5G09390.1	CD2-binding protein-related
Chr02	19060602	19060658	Chr02-184	214.3	0.639	+	Intergenic	Potri.002G212500	-7333	47.5	0.5	95	GO:0015238,GO:0015297,GO:0006855,GO:0055085,GO:0016020	AT5G65380.1	MATE efflux family protein
Chr07	7977166	7977222	Chr07-99	214.3	0.56	+	Intergenic	Potri.007G063500	2000	47.5	0.5	95		AT1G32740.1	SBP (S-ribonuclease binding protein) family protein
Chr01	12171329	12171385	Chr01-278	214.3	0.721	+	promoter-TSS (ID=Potri.001G148600.1.v3.0.exon.2;Parent=Potri.001G148600.1.v3.0;pacid=27044480)	Potri.001G148600	-164	47.5	0.5	95	GO:0000166,GO:0004812,GO:0005524,GO:0006418,GO:0005737,GO:0006412	AT4G10320.1	tRNA synthetase class I (I, L, M and V) family protein
Chr02	13047953	13048009	Chr02-182	214.3	0.717	+	Intergenic	Potri.002G171800	3268	47.5	0.5	95	GO:0009055,GO:0051536	AT1G60950.1	2Fe-2S ferredoxin-like superfamily protein
Chr02	4548275	4548331	Chr02-189	212.2	0.66	+	TTS (ID=Potri.002G067000.1.v3.0.exon.2;Parent=Potri.002G067000.1.v3.0;pacid=27020496)	Potri.002G067000	1055	47.5	0.5	95		AT1G48840.1	Plant protein of unknown function (DUF639)
Chr06	17486844	17486900	Chr06-241	210.1	0.703	+	Intergenic	Potri.006G169100	-17479	47.5	0.5	95		AT3G49950.1	GRAS family transcription factor
Chr18	4275308	4275364	Chr18-98	207.9	0.743	+	promoter-TSS (ID=Potri.018G046400.2.v3.0.exon.2;Parent=Potri.018G046400.2.v3.0;pacid=27011484)	Potri.018G046400	-182	47.5	0.5	95	GO:0003677,GO:0006355,GO:0005634,GO:0003700	AT5G08550.1	GC-rich sequence DNA-binding factor-like protein
Chr09	2149085	2149141	Chr09-111	201.6	0.697	+	TTS (ID=Potri.009G012400.2.v3.0.exon.19;Parent=Potri.009G012400.2.v3.0;pacid=26987969)	Potri.009G012400	448	47.5	0.5	95	GO:0005524,GO:0008033,GO:0004161,GO:0009058	AT5G19040.1	isopentenyltransferase 5
Chr10	2196124	2196180	Chr10-37	2102.7	0.654	+	Intergenic	Potri.010G016800	-1010	474.5	5	94.9		AT5G41790.1	COP1-interactive protein 1
Chr09	10851808	10851864	Chr09-7	1442.8	0.617	+	promoter-TSS (ID=Potri.009G134300.6.v3.0.exon.1;Parent=Potri.009G134300.6.v3.0;pacid=26987500)	Potri.009G134300	-158	332	3.5	94.8571	GO:0003677,GO:0006355	AT1G12260.1	NAC 007
Chr01	6577744	6577800	Chr01-106	418	0.772	+	promoter-TSS (ID=Potri.001G083400.2.v3.0.exon.1;Parent=Potri.001G083400.2.v3.0;pacid=27048692)	Potri.001G083400	-316	94.5	1	94.5
Chr01	9526980	9527036	Chr01-32	1205.2	0.679	+	Intergenic	Potri.001G118700	-1124	283	3	94.3333		AT1G23750.1	Nucleic acid-binding, OB-fold-like protein
Chr18	8319106	8319162	Chr18-33	428.6	0.638	+	Intergenic	Potri.018G065900	-13585	94	1	94	GO:0003700,GO:0043565,GO:0046983,GO:0006355	AT1G58110.1	Basic-leucine zipper (bZIP) transcription factor family protein
Chr03	13565003	13565059	Chr03-97	403.1	0.66	+	promoter-TSS (ID=Potri.003G112000.4.v3.0.exon.1;Parent=Potri.003G112000.4.v3.0;pacid=26996613)	Potri.003G112000	-265	94	1	94	GO:0008299	AT4G38460.1	geranylgeranyl reductase
Chr04	19086950	19087006	Chr04-167	210.1	0.696	+	promoter-TSS (ID=Potri.004G172100.1.v3.0.exon.1;Parent=Potri.004G172100.1.v3.0;pacid=26990630)	Potri.004G172100	-223	47	0.5	94		AT4G35730.1	Regulator of Vps4 activity in the MVB pathway protein
Chr01	35961666	35961722	Chr01-61	1601.9	0.684	+	exon (ID=Potri.001G352200.1.v3.0.exon.2;Parent=Potri.001G352200.1.v3.0;pacid=27047708, exon 1 of 1)	Potri.001G352200	991	375	4	93.75	GO:0004672,GO:0005524,GO:0006468,GO:0005515	AT1G17230.1	Leucine-rich receptor-like protein kinase family protein
Chr04	22882738	22882794	Chr04-87	409.5	0.874	+	TTS (ID=Potri.004G222600.1.v3.0.exon.3;Parent=Potri.004G222600.1.v3.0;pacid=26989623)	Potri.004G222700	922	93.5	1	93.5	GO:0003676,GO:0006810,GO:0005622	AT5G60980.2	Nuclear transport factor 2 (NTF2) family protein with RNA binding (RRM-RBD-RNP motifs) domain
Chr09	4247506	4247562	Chr09-27	884.8	0.661	+	Intergenic	Potri.009G032000	-10146	186.5	2	93.25	GO:0031072	AT1G79940.1	DnaJ / Sec63 Brl domains-containing protein
Chr10	8670592	8670648	Chr10-175	598.3	0.969	+	promoter-TSS (ID=Potri.010G057200.2.v3.0.exon.3;Parent=Potri.010G057200.2.v3.0;pacid=26980591)	Potri.010G057200	-305	139.5	1.5	93	GO:0006810,GO:0055085,GO:0016020,GO:0015171,GO:0003333	AT5G04770.1	cationic amino acid transporter 6
Chr16	12106392	12106448	Chr16-35	409.5	0.578	+	Intergenic	Potri.016G116700	-2176	93	1	93		AT5G43150.1
Chr19	15784356	15784412	Chr19-60	205.8	0.676	+	Intergenic	Potri.019G132400	-4166	46.5	0.5	93	GO:0003677	AT3G13540.1	myb domain protein 5
Chr09	12414950	12415006	Chr09-110	203.7	0.743	+	Intergenic	Potri.009G161000	1418	46.5	0.5	93	GO:0019843,GO:0005622,GO:0003723	AT5G39850.1	Ribosomal protein S4
Chr01	40698919	40698975	Chr01-339	199.4	0.729	+	Intergenic	Potri.001G389000	-10657	46.5	0.5	93
Chr11	11321108	11321164	Chr11-116	199.4	0.715	+	promoter-TSS (ID=Potri.011G093200.1.v3.0.exon.9;Parent=Potri.011G093200.1.v3.0;pacid=27001608)	Potri.011G093200	-200	46.5	0.5	93	GO:0055085	AT3G14410.1	Nucleotide/sugar transporter family protein
Chr19	2381469	2381525	Chr19-67	197.3	0.713	+	Intergenic	Potri.019G020800	4218	46.5	0.5	93	GO:0016787	AT3G12600.1	nudix hydrolase homolog 16
Chr13	15059208	15059264	Chr13-6	1831.1	0.654	+	promoter-TSS (ID=Potri.013G144600.1.v3.0.exon.2;Parent=Potri.013G144600.1.v3.0;pacid=26995350)	Potri.013G144600	-524	415.5	4.5	92.3333		AT4G05160.1	AMP-dependent synthetase and ligase family protein
scaffold_376	15283	15339	scaffold_376-1	613.2	0.747	+	Intergenic	Potri.T142000	2524	138.5	1.5	92.3333	GO:0055085,GO:0016021	AT4G00370.1	Major facilitator superfamily protein
Chr02	697272	697328	Chr02-43	668.4	0.608	+	promoter-TSS (ID=Potri.002G011800.1.v3.0.exon.2;Parent=Potri.002G011800.1.v3.0;pacid=27019909)	Potri.002G011800	-275	138	1.5	92	GO:0004553,GO:0005975	AT5G44640.1	beta glucosidase 13
Chr17	377600	377656	Chr17-35	598.3	0.716	+	Intergenic	Potri.017G005900	-1489	138	1.5	92	GO:0051082,GO:0006457,GO:0016272	AT1G08780.1	ABI3-interacting protein 3
Chr18	1072977	1073033	Chr18-35	409.5	0.771	+	Intergenic	Potri.018G013900	2954	92	1	92	GO:0005515	AT3G55960.1	Haloacid dehalogenase-like hydrolase (HAD) superfamily protein
Chr18	1964794	1964850	Chr18-112	207.9	0.685	+	promoter-TSS (ID=Potri.018G024600.2.v3.0.exon.2;Parent=Potri.018G024600.2.v3.0;pacid=27009155)	Potri.018G024600	-70	46	0.5	92	GO:0005515	AT2G02470.1	alfin-like 6
Chr18	14916913	14916969	Chr18-100	205.8	0.607	+	promoter-TSS (ID=Potri.018G127000.1.v3.0.exon.1;Parent=Potri.018G127000.1.v3.0;pacid=27011319)	Potri.018G127000	-191	46	0.5	92	GO:0015299,GO:0006812,GO:0055085,GO:0016021	AT3G05030.1	sodium hydrogen exchanger 2
Chr01	35011373	35011429	Chr01-398	203.7	0.671	+	TTS (ID=Potri.001G344800.1.v3.0.exon.1;Parent=Potri.001G344800.1.v3.0;pacid=27045672)	Potri.001G344800	125	46	0.5	92	GO:0003676,GO:0008270	AT5G66840.1	SAP domain-containing protein
Chr10	16201462	16201518	Chr10-157	203.7	0.706	+	Intergenic	Potri.010G154200	3148	46	0.5	92		AT3G29180.1	Protein of unknown function (DUF1336)
Chr18	5161027	5161083	Chr18-130	195.2	0.721	+	TTS (ID=Potri.018G050200.1.v3.0.exon.1;Parent=Potri.018G050200.1.v3.0;pacid=27010249)	Potri.018G050200	406	46	0.5	92	GO:0016491,GO:0008152	AT3G51680.1	NAD(P)-binding Rossmann-fold superfamily protein
Chr15	9737924	9737980	Chr15-20	634.4	0.725	+	Intergenic	Potri.015G072900	-4223	137.5	1.5	91.6667		AT5G64460.1	Phosphoglycerate mutase family protein
Chr03	14799027	14799083	Chr03-47	782.9	0.6	+	Intergenic	Potri.003G127500	-1079	183	2	91.5	GO:0016787	AT1G64670.1	alpha/beta-Hydrolases superfamily protein
Chr15	11428804	11428860	Chr15-47	392.5	0.737	+	promoter-TSS (ID=Potri.015G092400.3.v3.0.exon.4;Parent=Potri.015G092400.3.v3.0;pacid=27017917)	Potri.015G092400	14	91.5	1	91.5		AT1G65720.1
Chr05	10346302	10346358	Chr05-3	2684	0.882	+	Intergenic	Potri.005G129500	-45604	591.5	6.5	91	GO:0008234,GO:0006508	AT1G09730.1	Cysteine proteinases superfamily protein
Chr10	13791163	13791219	Chr10-162	212.2	0.575	+	Intergenic	Potri.010G121200	-2147	45.5	0.5	91		AT5G65170.1	VQ motif-containing protein
Chr05	11900463	11900519	Chr05-213	210.1	0.744	+	promoter-TSS (ID=Potri.005G141100.4.v3.0.exon.2;Parent=Potri.005G141100.4.v3.0;pacid=27030819)	Potri.005G141100	-613	45.5	0.5	91	GO:0003712,GO:0005634,GO:0007275	AT5G62090.1	SEUSS-like 2
Chr10	14011003	14011059	Chr10-189	199.4	0.664	+	Intergenic	Potri.010G123900	-1074	45.5	0.5	91		AT4G35220.1	Cyclase family protein
Chr05	14389343	14389399	Chr05-228	195.2	0.61	+	promoter-TSS (ID=Potri.005G152800.1.v3.0.exon.4;Parent=Potri.005G152800.1.v3.0;pacid=27031811)	Potri.005G152800	-266	45.5	0.5	91	GO:0016491,GO:0016706,GO:0055114	AT1G52820.1	2-oxoglutarate (2OG) and Fe(II)-dependent oxygenase superfamily protein
Chr09	1868309	1868365	Chr09-19	15983.3	0.685	+	Intergenic	Potri.009G010400	-6898	3730.5	41	90.9878	GO:0004672,GO:0005524,GO:0006468,GO:0005515	AT2G45340.1	Leucine-rich repeat protein kinase family protein
Chr09	6732847	6732903	Chr09-20	825.4	0.641	+	Intergenic	Potri.009G067300	-1517	181.5	2	90.75	GO:0009055,GO:0016491,GO:0055114	AT5G66760.1	succinate dehydrogenase 1-1
Chr10	315481	315537	Chr10-9	1181.8	0.753	+	promoter-TSS (ID=Potri.010G003300.1.v3.0.exon.14;Parent=Potri.010G003300.1.v3.0;pacid=26979686)	Potri.010G003300	-82	272	3	90.6667	GO:0003676	AT2G16940.1	Splicing factor, CC1-like
Chr17	14956098	14956154	Chr17-47	392.5	0.672	+	exon (ID=Potri.017G142100.1.v3.0.exon.1;Parent=Potri.017G142100.1.v3.0;pacid=26985129, exon 1 of 1)	Potri.017G142100	171	90.5	1	90.5	GO:0005515	AT1G32750.1	HAC13 protein (HAC13)
Chr08	3318730	3318786	Chr08-78	388.3	0.689	+	promoter-TSS (ID=Potri.008G056100.1.v3.0.exon.1;Parent=Potri.008G056100.1.v3.0;pacid=27040008)	Potri.008G056100	-372	90.5	1	90.5		AT3G58480.1	calmodulin-binding family protein
Chr07	12737675	12737731	Chr07-40	568.6	0.62	+	Intergenic	Potri.007G102400	-5118	135.5	1.5	90.3333		AT2G34640.1	plastid transcriptionally active 12
scaffold_970	755	811	scaffold_970-1	572.9	0.878	+	promoter-TSS (ID=Potri.T169500.1.v3.0.exon.2;Parent=Potri.T169500.1.v3.0;pacid=26988964)	Potri.T169500	-58	135	1.5	90	GO:0005515	AT4G12560.1	F-box and associated interaction domains-containing protein
Chr18	1247586	1247642	Chr18-128	210.1	0.625	+	Intergenic	Potri.018G015600	-2887	45	0.5	90	GO:0008168	AT2G21070.3	methyltransferases
Chr17	7549634	7549690	Chr17-105	203.7	0.77	+	Intergenic	Potri.017G068000	-8211	45	0.5	90		AT2G06010.1	OBP3-responsive gene 4
Chr18	7654519	7654575	Chr18-116	203.7	0.594	+	Intergenic	Potri.018G062000	-2711	45	0.5	90		AT2G35640.1	Homeodomain-like superfamily protein
Chr16	11386108	11386164	Chr16-101	199.4	0.674	+	Intergenic	Potri.016G111200	-2081	45	0.5	90		AT4G03200.1	catalytics
Chr01	6351129	6351185	Chr01-372	197.3	0.75	+	TTS (ID=Potri.001G080200.7.v3.0.exon.19;Parent=Potri.001G080200.7.v3.0;pacid=27040479)	Potri.001G080200	348	45	0.5	90	GO:0004672,GO:0005524,GO:0006468	AT4G32830.1	ataurora1
Chr18	6110509	6110565	Chr18-104	197.3	0.634	+	Intergenic	Potri.018G057700	-2796	45	0.5	90		AT5G18460.1	Protein of Unknown Function (DUF239)
Chr15	12497979	12498035	Chr15-110	195.2	0.685	+	Intergenic	Potri.015G107400	2672	45	0.5	90		AT2G30580.1	DREB2A-interacting protein 2
Chr03	20648790	20648846	Chr03-154	195.2	0.684	+	promoter-TSS (ID=Potri.003G205700.1.v3.0.exon.2;Parent=Potri.003G205700.1.v3.0;pacid=26996534)	Potri.003G205700	-374	45	0.5	90		AT4G32350.1	Regulator of Vps4 activity in the MVB pathway protein
Chr14	14756211	14756267	Chr14-115	193.1	0.807	+	Intergenic	Potri.014G179300	-7964	45	0.5	90		AT2G37210.1	lysine decarboxylase family protein
Chr12	15379444	15379500	Chr12-112	191	0.826	+	Intergenic	Potri.012G139300	-1056	45	0.5	90	GO:0005515	AT4G35270.1	Plant regulator RWP-RK family protein
scaffold_36	356857	356913	scaffold_36-3	191	0.674	+	Intergenic	Potri.T036000	29374	45	0.5	90	GO:0005509	AT3G52850.1	vacuolar sorting receptor homolog 1
scaffold_168	125774	125830	scaffold_168-1	1725	0.738	+	Intergenic	Potri.T108600	6517	404	4.5	89.7778
Chr02	11450587	11450643	Chr02-45	577.1	0.698	+	Intergenic	Potri.002G151700	-4892	134.5	1.5	89.6667	GO:0005524,GO:0030983,GO:0006298	AT5G54090.1	DNA mismatch repair protein MutS, type 2
Chr14	14504188	14504244	Chr14-64	422.2	0.741	+	promoter-TSS (ID=Potri.014G176900.3.v3.0.exon.5;Parent=Potri.014G176900.3.v3.0;pacid=27033574)	Potri.014G176900	-184	89.5	1	89.5		AT2G43945.1
Chr08	17874409	17874465	Chr08-65	394.6	0.652	+	Intergenic	Potri.008G217600	5002	89.5	1	89.5	GO:0004553,GO:0005975	AT1G13130.1	Cellulase (glycosyl hydrolase family 5) protein
Chr01	38352252	38352308	Chr01-145	386.2	0.629	+	Intergenic	Potri.001G369500	3937	89.5	1	89.5	GO:0004553,GO:0005975	AT2G44480.1	beta glucosidase 17
Chr08	18090224	18090280	Chr08-48	950.6	0.724	+	Intergenic	Potri.008G218200	9400	222.5	2.5	89
Chr11	2202762	2202818	Chr11-115	205.8	0.645	+	promoter-TSS (ID=Potri.011G026800.1.v3.0.exon.2;Parent=Potri.011G026800.1.v3.0;pacid=27001665)	Potri.011G026800	-80	44.5	0.5	89	GO:0055085,GO:0016021	AT1G71090.1	Auxin efflux carrier family protein
Chr06	10243285	10243341	Chr06-194	199.4	0.658	+	Intergenic	Potri.006G126700	-2744	44.5	0.5	89		AT2G04865.1	Aminotransferase-like, plant mobile domain family protein
Chr09	3014519	3014575	Chr09-112	199.4	0.587	+	promoter-TSS (ID=Potri.009G018400.4.v3.0.exon.3;Parent=Potri.009G018400.4.v3.0;pacid=26986658)	Potri.009G018400	-132	44.5	0.5	89
Chr08	5800707	5800763	Chr08-128	195.2	0.74	+	Intergenic	Potri.008G092700	-4385	44.5	0.5	89		AT2G18940.1	Tetratricopeptide repeat (TPR)-like superfamily protein
Chr18	7936980	7937036	Chr18-21	1568	0.642	+	Intergenic	Potri.018G063400	-6841	355.5	4	88.875		AT5G59790.1	Domain of unknown function (DUF966)
Chr08	2454180	2454236	Chr08-13	1109.7	0.806	+	promoter-TSS (ID=Potri.008G043000.1.v3.0.exon.2;Parent=Potri.008G043000.1.v3.0;pacid=27036753)	Potri.008G043000	-464	266.5	3	88.8333	GO:0004672,GO:0005524,GO:0006468,GO:0005515	AT1G51800.1	Leucine-rich repeat protein kinase family protein
Chr11	4469885	4469941	Chr11-9	1374.9	0.702	+	promoter-TSS (ID=Potri.011G052200.1.v3.0.exon.1;Parent=Potri.011G052200.1.v3.0;pacid=27001081)	Potri.011G052200	-376	310.5	3.5	88.7143	GO:0006260,GO:0005634,GO:0003677	AT5G27740.1	ATPase family associated with various cellular activities (AAA)
Chr11	4479314	4479370	Chr11-7	4438.7	0.764	+	TTS (ID=Potri.011G052300.1.v3.0.exon.1;Parent=Potri.011G052300.1.v3.0;pacid=27002632)	Potri.011G052300	2117	1062	12	88.5	GO:0003677,GO:0006355	AT2G46870.1	AP2/B3-like transcriptional factor family protein
Chr15	4178987	4179043	Chr15-8	3161.4	0.657	+	Intergenic	Potri.015G043300	13725	708	8	88.5		AT4G24370.1
scaffold_34	297662	297718	scaffold_34-1	1523.4	0.64	+	Intergenic	Potri.T032800	-7612	354	4	88.5	GO:0016021	AT2G19580.1	tetraspanin2
Chr10	2590487	2590543	Chr10-74	381.9	0.689	+	Intergenic	Potri.010G018900	6197	88.5	1	88.5		AT4G31980.1
Chr02	7528376	7528432	Chr02-56	2340.3	0.763	+	Intergenic	Potri.002G104000	-3836	575	6.5	88.4615
Chr13	11556376	11556432	Chr13-15	766	0.726	+	promoter-TSS (ID=Potri.013G102200.1.v3.0.exon.1;Parent=Potri.013G102200.1.v3.0;pacid=26995044)	Potri.013G102200	-67	176.5	2	88.25		AT4G16100.1	Protein of unknown function (DUF789)
Chr17	9772598	9772654	Chr17-14	789.3	0.742	+	Intergenic	Potri.017G082500	-10794	176	2	88	GO:0005515	AT3G18670.1	Ankyrin repeat family protein
Chr12	5319130	5319186	Chr12-117	205.8	0.706	+	Intergenic	Potri.012G053100	3873	44	0.5	88	GO:0046872,GO:0030001	AT5G27690.1	Heavy metal transport/detoxification superfamily protein
Chr17	3886917	3886973	Chr17-69	201.6	0.676	+	Intergenic	Potri.017G046300	9444	44	0.5	88	GO:0016787	AT5G18280.2	apyrase 2
Chr15	12207814	12207870	Chr15-128	195.2	0.672	+	promoter-TSS (ID=Potri.015G104000.2.v3.0.exon.1;Parent=Potri.015G104000.2.v3.0;pacid=27018229)	Potri.015G104000	-102	44	0.5	88	GO:0004672,GO:0005524,GO:0006468	AT2G17220.1	Protein kinase superfamily protein
Chr18	14945723	14945779	Chr18-106	195.2	0.701	+	promoter-TSS (ID=Potri.018G127300.1.v3.0.exon.2;Parent=Potri.018G127300.1.v3.0;pacid=27011489)	Potri.018G127300	-204	44	0.5	88		AT5G45470.1	Protein of unknown function (DUF594)
Chr02	11043398	11043454	Chr02-245	191	0.77	+	Intergenic	Potri.002G148600	-2586	44	0.5	88	GO:0005515	AT1G20540.1	Transducin/WD40 repeat-like superfamily protein
Chr13	14961138	14961194	Chr13-114	186.7	0.627	+	Intergenic	Potri.013G143900	-3617	44	0.5	88	GO:0004672,GO:0005524,GO:0006468	AT2G42880.1	MAP kinase 20
Chr08	5083118	5083174	Chr08-169	180.4	0.699	+	promoter-TSS (ID=Potri.008G081000.2.v3.0.exon.1;Parent=Potri.008G081000.2.v3.0;pacid=27036238)	Potri.008G081000	-716	44	0.5	88		AT2G45120.1	C2H2-like zinc finger protein
Chr11	14741698	14741754	Chr11-12	8514.6	0.762	+	exon (ID=Potri.011G122500.2.v3.0.exon.7;Parent=Potri.011G122500.2.v3.0;pacid=27001467, exon 1 of 1)	Potri.011G122500	493	1977	22.5	87.8667		AT4G17900.1	PLATZ transcription factor family protein
Chr01	50247286	50247342	Chr01-26	9902.3	0.7	+	Intergenic	Potri.001G470900	-1282	2457.5	28	87.7679		AT5G13660.1
Chr05	21298202	21298258	Chr05-45	7290.4	0.814	+	Intergenic	Potri.005G196400	-4481	2013.5	23	87.5435	GO:0015979,GO:0009522,GO:0009579,GO:0016021	ATCG00350.1	Photosystem I, PsaA/PsaB protein
Chr07	2020343	2020399	Chr07-42	369.2	0.731	+	promoter-TSS (ID=Potri.007G026600.1.v3.0.exon.1;Parent=Potri.007G026600.1.v3.0;pacid=27014846)	Potri.007G026600	-252	87.5	1	87.5	GO:0016820,GO:0015991,GO:0033178,GO:0046933,GO:0046961,GO:0015992,GO:0046034,GO:0016469	ATCG00480.1	ATP synthase subunit beta
Chr19	580072	580128	Chr19-30	575	0.712	+	Intergenic	Potri.019G005300	-2870	131	1.5	87.3333	GO:0016020,GO:0055085	AT1G12500.1	Nucleotide-sugar transporter family protein
Chr02	15569386	15569442	Chr02-13	1317.6	0.701	+	Intergenic	Potri.002G194700	-1894	305.5	3.5	87.2857	GO:0005506,GO:0009055,GO:0016491,GO:0050660,GO:0016021,GO:0055114,GO:0004601,GO:0050664	AT5G47910.1	respiratory burst oxidase homologue D
Chr02	7633296	7633352	Chr02-33	4228.7	0.732	+	Intergenic	Potri.002G105100	4755	1132	13	87.0769
Chr15	14841230	14841286	Chr15-39	396.8	0.731	+	Intergenic	Potri.015G141300	-4190	87	1	87	GO:0005515,GO:0005543,GO:0003924,GO:0005525	AT1G59610.1	dynamin-like 3
Chr03	17079277	17079333	Chr03-74	381.9	0.601	+	promoter-TSS (ID=Potri.003G158800.1.v3.0.exon.1;Parent=Potri.003G158800.1.v3.0;pacid=26996328)	Potri.003G158800	-43	87	1	87	GO:0008236,GO:0006508,GO:0016787	AT4G24760.1	alpha/beta-Hydrolases superfamily protein
Chr12	6256433	6256489	Chr12-110	203.7	0.652	+	Intergenic	Potri.012G059600	1654	43.5	0.5	87		AT2G39650.1	Protein of unknown function (DUF506)
Chr02	6801697	6801753	Chr02-200	195.2	0.695	+	Intergenic	Potri.002G094500	5065	43.5	0.5	87		AT1G19260.1	TTF-type zinc finger protein with HAT dimerisation domain
Chr01	15503412	15503468	Chr01-364	191	0.694	+	Intergenic	Potri.001G179400	-6710	43.5	0.5	87	GO:0005506,GO:0009055,GO:0016705,GO:0020037,GO:0055114	AT5G36110.1	cytochrome P450, family 716, subfamily A, polypeptide 1
Chr04	3999317	3999373	Chr04-191	186.7	0.674	+	Intergenic	Potri.004G051600	8693	43.5	0.5	87	GO:0005515,GO:0007165,GO:0005622,GO:0045087,GO:0031224,GO:0004888	AT1G61105.1	Toll-Interleukin-Resistance (TIR) domain family protein
Chr01	39458455	39458511	Chr01-616	186.7	0.926	+	Intergenic	Potri.001G378400	1939	43.5	0.5	87		AT5G48870.1	Small nuclear ribonucleoprotein family protein
Chr02	18398549	18398605	Chr02-1	9102.4	0.858	+	Intergenic	Potri.002G211800	9612	2085.5	24	86.8958		AT5G22640.1	MORN (Membrane Occupation and Recognition Nexus) repeat-containing protein
Chr01	50034921	50034977	Chr01-38	3413.9	0.679	+	Intergenic	Potri.001G467300	-3440	868	10	86.8		AT3G13030.1	hAT transposon superfamily protein
scaffold_289	13676	13732	scaffold_289-1	46521.8	0.915	+	Intergenic	Potri.T135500	2685	11626	134	86.7612		AT2G40390.1
Chr13	13883236	13883292	Chr13-12	768.1	0.659	+	promoter-TSS (ID=Potri.013G126000.1.v3.0.exon.1;Parent=Potri.013G126000.1.v3.0;pacid=26994586)	Potri.013G126000	-101	173.5	2	86.75		AT1G33800.1	Protein of unknown function (DUF579)
Chr16	7302060	7302116	Chr16-47	749	0.803	+	Intergenic	Potri.016G089900	3102	173.5	2	86.75	GO:0016021	AT4G30850.1	heptahelical transmembrane protein2
Chr04	4334117	4334173	Chr04-2	17347.6	0.708	+	promoter-TSS (ID=Potri.004G054900.1.v3.0.exon.1;Parent=Potri.004G054900.1.v3.0;pacid=26990494)	Potri.004G054900	-237	3850.5	44.5	86.5281		AT2G04039.1
Chr13	6675293	6675349	Chr13-62	367.1	0.733	+	promoter-TSS (ID=Potri.013G077500.1.v3.0.exon.1;Parent=Potri.013G077500.1.v3.0;pacid=26995694)	Potri.013G077500	-904	86.5	1	86.5	GO:0003677,GO:0006355	AT1G65910.1	NAC domain containing protein 28
Chr10	21189247	21189303	Chr10-10	1105.4	0.745	+	Intergenic	Potri.010G229400	-1980	259	3	86.3333	GO:0003735,GO:0006412,GO:0005622,GO:0005840	AT3G61110.1	ribosomal protein S27
Chr10	9261508	9261564	Chr10-30	1498	0.641	+	promoter-TSS (ID=Potri.010G065000.1.v3.0.exon.6;Parent=Potri.010G065000.1.v3.0;pacid=26979863)	Potri.010G065000	152	344	4	86	GO:0005515,GO:0042578	AT3G59770.1	sacI homology domain-containing protein / WW domain-containing protein
Chr04	9095772	9095828	Chr04-50	398.9	0.698	+	Intergenic	Potri.004G103300	-2147	86	1	86		AT1G10380.1	Putative membrane lipoprotein
Chr09	3724743	3724799	Chr09-69	364.9	0.707	+	TTS (ID=Potri.009G026200.6.v3.0.exon.10;Parent=Potri.009G026200.6.v3.0;pacid=26988054)	Potri.009G026200	1089	86	1	86	GO:0005515,GO:0008565,GO:0006606,GO:0005634,GO:0005737,GO:0006886,GO:0005643	AT3G06720.1	importin alpha isoform 1
Chr09	917571	917627	Chr09-118	197.3	0.76	+	promoter-TSS (ID=Potri.009G004400.1.v3.0.exon.5;Parent=Potri.009G004400.1.v3.0;pacid=26985858)	Potri.009G004400	-98	43	0.5	86	GO:0016773,GO:0006468,GO:0019748	AT1G49820.1	S-methyl-5-thioribose kinase
Chr08	2947873	2947929	Chr08-154	193.1	0.724	+	Intergenic	Potri.008G049700	1882	43	0.5	86		AT4G27220.1	NB-ARC domain-containing disease resistance protein
Chr06	18956461	18956517	Chr06-252	188.8	0.683	+	Intergenic	Potri.006G176700	-3163	43	0.5	86	GO:0005515	AT2G30050.1	transducin family protein / WD-40 repeat family protein
scaffold_178	47548	47604	scaffold_178-1	188.8	0.737	+	TTS (ID=Potri.T113200.1.v3.0.exon.1;Parent=Potri.T113200.1.v3.0;pacid=27000292)	Potri.T113200	933	43	0.5	86	GO:0004672,GO:0005524,GO:0006468,GO:0006950	AT1G16760.1	Protein kinase protein with adenine nucleotide alpha hydrolases-like domain
Chr01	2513638	2513694	Chr01-431	186.7	0.796	+	promoter-TSS (ID=Potri.001G035100.1.v3.0.exon.1;Parent=Potri.001G035100.1.v3.0;pacid=27046237)	Potri.001G035000	6	43	0.5	86	GO:0004672,GO:0005524,GO:0006468,GO:0005515	AT3G24240.1	Leucine-rich repeat receptor-like protein kinase family protein
Chr01	2473051	2473107	Chr01-371	180.4	0.689	+	TTS (ID=Potri.001G034200.2.v3.0.exon.1;Parent=Potri.001G034200.2.v3.0;pacid=27047497)	Potri.001G034200	124	43	0.5	86	GO:0003677,GO:0046983,GO:0043565,GO:0006355,GO:0005634,GO:0003700	AT2G03060.2	AGAMOUS-like 30
Chr06	25287514	25287570	Chr06-222	176.1	0.626	+	promoter-TSS (ID=Potri.006G245000.1.v3.0.exon.7;Parent=Potri.006G245000.1.v3.0;pacid=27008448)	Potri.006G245000	85	43	0.5	86
Chr11	4839533	4839589	Chr11-36	560.1	0.718	+	promoter-TSS (ID=Potri.011G055500.1.v3.0.exon.2;Parent=Potri.011G055500.1.v3.0;pacid=27000905)	Potri.011G055500	40	128.5	1.5	85.6667	GO:0006629,GO:0016705,GO:0006633,GO:0055114,GO:0016021,GO:0016491	AT4G04930.1	fatty acid desaturase family protein
Chr11	15948876	15948932	Chr11-14	918.7	0.796	+	TTS (ID=Potri.011G135700.1.v3.0.exon.1;Parent=Potri.011G135700.1.v3.0;pacid=27002359)	Potri.011G135700	196	212.5	2.5	85	GO:0006886,GO:0005783,GO:0016021	AT5G42570.1	B-cell receptor-associated 31-like
Chr09	2089898	2089954	Chr09-84	394.6	0.82	+	promoter-TSS (ID=Potri.009G011900.1.v3.0.exon.15;Parent=Potri.009G011900.1.v3.0;pacid=26985902)	Potri.009G011900	-26	85	1	85		AT2G01050.1	zinc ion binding;nucleic acid binding
Chr02	11704327	11704383	Chr02-217	199.4	0.692	+	Intergenic	Potri.002G155200	3781	42.5	0.5	85	GO:0031072	AT1G74250.1	DNAJ heat shock N-terminal domain-containing protein
Chr05	17338084	17338140	Chr05-207	199.4	0.7	+	Intergenic	Potri.005G166500	-1500	42.5	0.5	85		AT5G47100.1	calcineurin B-like protein 9
Chr01	9148443	9148499	Chr01-335	193.1	0.651	+	promoter-TSS (ID=Potri.001G114400.1.v3.0.exon.1;Parent=Potri.001G114400.1.v3.0;pacid=27042912)	Potri.001G114400	6	42.5	0.5	85	GO:0004190,GO:0006508	AT5G10080.1	Eukaryotic aspartyl protease family protein
Chr02	15107719	15107775	Chr02-218	191	0.669	+	Intergenic	Potri.002G190800	-1218	42.5	0.5	85		AT2G19390.1
Chr02	7385246	7385302	Chr02-197	188.8	0.679	+	Intergenic	Potri.002G102100	-5722	42.5	0.5	85	GO:0004518,GO:0006281	AT5G26680.2	5\'-3\' exonuclease family protein
Chr17	3609819	3609875	Chr17-92	186.7	0.762	+	promoter-TSS (ID=Potri.017G042600.1.v3.0.exon.1;Parent=Potri.017G042600.1.v3.0;pacid=26984132)	Potri.017G042600	-251	42.5	0.5	85		AT3G07580.1
Chr18	13718011	13718067	Chr18-105	184.6	0.646	+	promoter-TSS (ID=Potri.018G111300.1.v3.0.exon.1;Parent=Potri.018G111300.1.v3.0;pacid=27008864)	Potri.018G111300	-310	42.5	0.5	85	GO:0004672,GO:0005524,GO:0006468,GO:0004674	AT2G19400.1	AGC (cAMP-dependent, cGMP-dependent and protein kinase C) kinase family protein
Chr01	21478460	21478516	Chr01-422	182.5	0.71	+	Intergenic	Potri.001G212700	-3942	42.5	0.5	85		AT1G61260.1	Protein of unknown function (DUF761)
Chr03	13144452	13144508	Chr03-236	180.4	0.646	+	Intergenic	Potri.003G107600	-2698	42.5	0.5	85	GO:0004812,GO:0005524,GO:0006418,GO:0000166,GO:0005737,GO:0006412,GO:0006426,GO:0004820	AT1G29880.1	glycyl-tRNA synthetase / glycine--tRNA ligase
Chr13	4339266	4339322	Chr13-117	180.4	0.748	+	Intergenic	Potri.013G057700	-1119	42.5	0.5	85	GO:0004579,GO:0018279,GO:0005789	AT5G66680.1	dolichyl-diphosphooligosaccharide-protein glycosyltransferase 48kDa subunit family protein
Chr16	12573103	12573159	Chr16-11	6335.6	0.658	+	promoter-TSS (ID=Potri.016G120900.2.v3.0.exon.6;Parent=Potri.016G120900.2.v3.0;pacid=27012637)	Potri.016G120900	101	1486	17.5	84.9143	GO:0016881,GO:0005515	AT5G53300.1	ubiquitin-conjugating enzyme 10
Chr02	6966892	6966948	Chr02-4	5147.4	0.694	+	promoter-TSS (ID=Potri.002G096500.1.v3.0.exon.6;Parent=Potri.002G096500.1.v3.0;pacid=27024079)	Potri.002G096500	-717	1145.5	13.5	84.8519	GO:0003676,GO:0005524,GO:0008026,GO:0004386	AT2G33730.1	P-loop containing nucleoside triphosphate hydrolases superfamily protein
Chr07	11901106	11901162	Chr07-7	2034.8	0.639	+	Intergenic	Potri.007G092100	-1071	466.5	5.5	84.8182	GO:0004672,GO:0006468,GO:0004674	AT4G23160.1	cysteine-rich RLK (RECEPTOR-like protein kinase) 8
Chr08	12341030	12341086	Chr08-19	935.7	0.784	+	promoter-TSS (ID=Potri.008G181000.7.v3.0.exon.1;Parent=Potri.008G181000.7.v3.0;pacid=27039441)	Potri.008G181000	-184	212	2.5	84.8		AT5G57520.1	zinc finger protein 2
Chr01	28652914	28652970	Chr01-215	345.8	0.763	+	Intergenic	Potri.001G279900	-2146	84.5	1	84.5	GO:0003677,GO:0046983,GO:0003700,GO:0006355,GO:0005634,GO:0043565	AT5G65070.1	K-box region and MADS-box transcription factor family protein
Chr01	39233076	39233132	Chr01-28	2005.1	0.7	+	promoter-TSS (ID=Potri.001G376500.1.v3.0.exon.3;Parent=Potri.001G376500.1.v3.0;pacid=27044421)	Potri.001G376500	-62	464.5	5.5	84.4545	GO:0003700,GO:0043565,GO:0006355,GO:0003677,GO:0005634	AT2G23760.1	BEL1-like homeodomain 4
Chr08	7486704	7486760	Chr08-30	1778	0.703	+	TTS (ID=Potri.008G116700.1.v3.0.exon.1;Parent=Potri.008G116700.1.v3.0;pacid=27037776)	Potri.008G116700	663	422	5	84.4	GO:0009055,GO:0015035,GO:0045454	AT3G62930.1	Thioredoxin superfamily protein
Chr15	9559696	9559752	Chr15-3	2773.1	0.782	+	promoter-TSS (ID=Potri.015G071100.1.v3.0.exon.1;Parent=Potri.015G071100.1.v3.0;pacid=27018950)	Potri.015G071100	-121	631.5	7.5	84.2		AT4G02550.1
Chr08	9903997	9904053	Chr08-44	562.3	0.652	+	Intergenic	Potri.008G147100	-1036	126	1.5	84		AT4G10890.1
Chr08	16019079	16019135	Chr08-87	369.2	0.695	+	TTS (ID=Potri.008G209600.1.v3.0.exon.1;Parent=Potri.008G209600.1.v3.0;pacid=27039582)	Potri.008G209600	683	84	1	84		AT3G61930.1
Chr08	7319930	7319986	Chr08-64	369.2	0.73	+	Intergenic	Potri.008G114500	1847	84	1	84		AT3G53000.1	phloem protein 2-A15
Chr06	23542153	23542209	Chr06-92	360.7	0.741	+	promoter-TSS (ID=Potri.006G222900.2.v3.0.exon.8;Parent=Potri.006G222900.2.v3.0;pacid=27004696)	Potri.006G222900	157	84	1	84	GO:0004190,GO:0006508	AT5G33340.1	Eukaryotic aspartyl protease family protein
Chr18	14988144	14988200	Chr18-101	201.6	0.639	+	Intergenic	Potri.018G127700	-1764	42	0.5	84		AT2G28310.1	Protein of unknown function (DUF707)
Chr06	6260969	6261025	Chr06-218	191	0.697	+	Intergenic	Potri.006G083000	-1389	42	0.5	84
Chr04	19283225	19283281	Chr04-159	188.8	0.707	+	promoter-TSS (ID=Potri.004G174400.1.v3.0.exon.1;Parent=Potri.004G174400.1.v3.0;pacid=26992635)	Potri.004G174400	-198	42	0.5	84	GO:0003677	AT1G79180.1	myb domain protein 63
Chr01	28417602	28417658	Chr01-484	186.7	0.827	+	TTS (ID=Potri.001G277900.1.v3.0.exon.3;Parent=Potri.001G277900.1.v3.0;pacid=27048747)	Potri.001G277900	163	42	0.5	84	GO:0005515,GO:0003677,GO:0005634,GO:0030528,GO:0006355,GO:0005516	AT1G67310.1	Calmodulin-binding transcription activator protein with CG-1 and Ankyrin domains
Chr15	4797120	4797176	Chr15-114	184.6	0.662	+	Intergenic	Potri.015G047200	-1508	42	0.5	84	GO:0004650,GO:0005975	AT3G62110.1	Pectin lyase-like superfamily protein
Chr05	25246725	25246781	Chr05-227	180.4	0.74	+	TTS (ID=Potri.005G249500.1.v3.0.exon.1;Parent=Potri.005G249500.1.v3.0;pacid=27028422)	Potri.005G249500	1464	42	0.5	84		AT1G69040.2	ACT domain repeat 4
Chr02	9117376	9117432	Chr02-48	2331.8	0.651	+	Intergenic	Potri.002G121800	1522	545.5	6.5	83.9231
Chr09	2608895	2608951	Chr09-34	543.2	0.651	+	promoter-TSS (ID=Potri.009G015200.1.v3.0.exon.1;Parent=Potri.009G015200.1.v3.0;pacid=26987877)	Potri.009G015100	-55	125.5	1.5	83.6667		AT1G29290.1
Chr01	7214864	7214920	Chr01-168	373.4	0.641	+	Intergenic	Potri.001G091800	3199	83.5	1	83.5	GO:0004970,GO:0005234,GO:0016020,GO:0005215,GO:0006810,GO:0030288	AT1G05200.1	glutamate receptor 3.4
Chr01	42583107	42583163	Chr01-178	369.2	0.641	+	promoter-TSS (ID=Potri.001G404300.1.v3.0.exon.1;Parent=Potri.001G404300.1.v3.0;pacid=27045760)	Potri.001G404300	-575	83	1	83		AT4G15770.1	RNA binding
Chr17	5234034	5234090	Chr17-39	354.3	0.616	+	Intergenic	Potri.017G057700	-2060	83	1	83	GO:0005524,GO:0008033,GO:0004161,GO:0009058	AT1G68460.1	isopentenyltransferase 1
scaffold_20	451007	451063	scaffold_20-2	354.3	0.721	+	Intergenic	Potri.T002300	6780	83	1	83		AT4G17050.1	ureidoglycine aminohydrolase
scaffold_77	190368	190424	scaffold_77-1	195.2	0.641	+	Intergenic	Potri.T072100	-26871	41.5	0.5	83	GO:0031072	AT5G53150.1	DNAJ heat shock N-terminal domain-containing protein
Chr08	6986918	6986974	Chr08-148	195.2	0.645	+	TTS (ID=Potri.008G109900.3.v3.0.exon.18;Parent=Potri.008G109900.3.v3.0;pacid=27039021)	Potri.008G109900	689	41.5	0.5	83	GO:0004252,GO:0006508	AT5G19660.1	SITE-1 protease
Chr03	9751628	9751684	Chr03-223	193.1	0.691	+	Intergenic	Potri.003G069300	3144	41.5	0.5	83	GO:0003677,GO:0006355	AT4G01500.1	AP2/B3-like transcriptional factor family protein
Chr06	25677463	25677519	Chr06-196	191	0.671	+	Intergenic	Potri.006G250700	1287	41.5	0.5	83	GO:0004672,GO:0005524,GO:0006468,GO:0007165	AT3G17510.1	CBL-interacting protein kinase 1
Chr09	6524233	6524289	Chr09-122	184.6	0.689	+	promoter-TSS (ID=Potri.009G064300.1.v3.0.exon.1;Parent=Potri.009G064300.1.v3.0;pacid=26986090)	Potri.009G064300	-101	41.5	0.5	83		AT4G04980.1
Chr05	3826894	3826950	Chr05-243	184.6	0.685	+	promoter-TSS (ID=Potri.005G053700.3.v3.0.exon.8;Parent=Potri.005G053700.3.v3.0;pacid=27029174)	Potri.005G053700	-347	41.5	0.5	83		AT5G50011.1	conserved peptide upstream open reading frame 37
Chr03	3012434	3012490	Chr03-163	184.6	0.64	+	Intergenic	Potri.003G025200	-3061	41.5	0.5	83	GO:0006511,GO:0007275,GO:0005634	AT5G37930.1	Protein with RING/U-box and TRAF-like domains
Chr04	7806488	7806544	Chr04-189	182.5	0.706	+	promoter-TSS (ID=Potri.004G092200.2.v3.0.exon.1;Parent=Potri.004G092200.2.v3.0;pacid=26990434)	Potri.004G092200	-777	41.5	0.5	83	GO:0005515,GO:0006886,GO:0016192	AT1G08190.1	vacuolar protein sorting 41
Chr03	20509669	20509725	Chr03-178	182.5	0.772	+	Intergenic	Potri.003G204300	2075	41.5	0.5	83	GO:0003677	AT5G42630.1	Homeodomain-like superfamily protein
Chr08	3890175	3890231	Chr08-134	182.5	0.578	+	promoter-TSS (ID=Potri.008G064400.1.v3.0.exon.1;Parent=Potri.008G064400.1.v3.0;pacid=27037433)	Potri.008G064400	-781	41.5	0.5	83		AT4G24110.1
Chr14	9751805	9751861	Chr14-126	176.1	0.879	+	Intergenic	Potri.014G127000	-4940	41.5	0.5	83		AT3G58110.1
Chr15	12239197	12239253	Chr15-155	176.1	0.694	+	Intergenic	Potri.015G104200	-7725	41.5	0.5	83	GO:0005216,GO:0006811,GO:0055085,GO:0016020	AT4G32650.3	potassium channel in Arabidopsis thaliana 3
Chr05	13119909	13119965	Chr05-1	7791.1	0.895	+	Intergenic	Potri.005G148300	12150	1778	21.5	82.6977	GO:0003677,GO:0008270,GO:0006355	AT3G47500.1	cycling DOF factor 3
Chr06	2710931	2710987	Chr06-28	1099.1	0.632	+	promoter-TSS (ID=Potri.006G038500.3.v3.0.exon.2;Parent=Potri.006G038500.3.v3.0;pacid=27005691)	Potri.006G038500	-634	248	3	82.6667		AT3G15030.1	TCP family transcription factor 4
Chr05	10904212	10904268	Chr05-16	1273.1	0.911	+	promoter-TSS (ID=Potri.005G134200.1.v3.0.exon.1;Parent=Potri.005G134200.1.v3.0;pacid=27029184)	Potri.005G134200	-594	289	3.5	82.5714		AT5G35810.1	Ankyrin repeat family protein
Chr04	7784539	7784595	Chr04-75	354.3	0.606	+	TTS (ID=Potri.004G091800.2.v3.0.exon.8;Parent=Potri.004G091800.2.v3.0;pacid=26989440)	Potri.004G091800	1163	82.5	1	82.5	GO:0003735,GO:0006414,GO:0005622,GO:0005840	AT5G24510.1	60S acidic ribosomal protein family
Chr04	4746546	4746602	Chr04-27	702.3	0.652	+	promoter-TSS (ID=Potri.004G059000.3.v3.0.exon.1;Parent=Potri.004G059000.3.v3.0;pacid=26991955)	Potri.004G059000	-331	164.5	2	82.25		AT5G05800.1
scaffold_218	31613	31669	scaffold_218-1	1485.2	0.705	+	TTS (ID=Potri.T123900.1.v3.0.exon.7;Parent=Potri.T123900.1.v3.0;pacid=26993282)	Potri.T123900	1579	328	4	82	GO:0003993	AT4G29260.1	HAD superfamily, subfamily IIIB acid phosphatase
Chr18	474070	474126	Chr18-57	360.7	0.757	+	Intergenic	Potri.018G006000	-2806	82	1	82	GO:0003824	AT1G07630.1	pol-like 5
Chr08	3917529	3917585	Chr08-233	350.1	0.929	+	promoter-TSS (ID=Potri.008G064700.1.v3.0.exon.1;Parent=Potri.008G064700.1.v3.0;pacid=27040006)	Potri.008G064700	-219	82	1	82		AT1G26110.1	decapping 5
Chr15	9347428	9347484	Chr15-134	188.8	0.684	+	promoter-TSS (ID=Potri.015G068900.2.v3.0.exon.1;Parent=Potri.015G068900.2.v3.0;pacid=27018481)	Potri.015G068900	-639	41	0.5	82		AT5G07960.1
Chr05	11163421	11163477	Chr05-212	188.8	0.757	+	Intergenic	Potri.005G136400	-1847	41	0.5	82		AT4G25680.1	PPPDE putative thiol peptidase family protein
Chr14	3573237	3573293	Chr14-120	184.6	0.615	+	TTS (ID=Potri.014G045000.1.v3.0.exon.8;Parent=Potri.014G045000.1.v3.0;pacid=27033593)	Potri.014G045000	804	41	0.5	82		AT3G11690.1
Chr18	6114277	6114333	Chr18-108	184.6	0.769	+	Intergenic	Potri.018G057800	-3655	41	0.5	82		AT4G38160.2	Mitochondrial transcription termination factor family protein
Chr08	14467710	14467766	Chr08-164	180.4	0.821	+	Intergenic	Potri.008G202800	13285	41	0.5	82	GO:0043531,GO:0006915,GO:0005524	AT3G14470.1	NB-ARC domain-containing disease resistance protein
Chr08	6468571	6468627	Chr08-138	178.2	0.731	+	promoter-TSS (ID=Potri.008G101800.1.v3.0.exon.1;Parent=Potri.008G101800.1.v3.0;pacid=27038827)	Potri.008G101800	-959	41	0.5	82	GO:0016491,GO:0016706,GO:0055114	AT4G10500.1	2-oxoglutarate (2OG) and Fe(II)-dependent oxygenase superfamily protein
Chr10	19376881	19376937	Chr10-217	178.2	0.764	+	promoter-TSS (ID=Potri.010G202000.2.v3.0.exon.4;Parent=Potri.010G202000.2.v3.0;pacid=26982933)	Potri.010G202000	-296	41	0.5	82		AT5G04420.1	Galactose oxidase/kelch repeat superfamily protein
Chr09	1359450	1359506	Chr09-121	176.1	0.675	+	Intergenic	Potri.009G007500	-22446	41	0.5	82	GO:0015079,GO:0071805,GO:0016020	AT4G23640.1	Potassium transporter family protein
Chr07	12282435	12282491	Chr07-123	176.1	0.754	+	promoter-TSS (ID=Potri.007G096800.2.v3.0.exon.1;Parent=Potri.007G096800.2.v3.0;pacid=27016676)	Potri.007G096800	-287	41	0.5	82	GO:0003824	AT2G40180.1	phosphatase 2C5
Chr15	10400238	10400294	Chr15-142	174	0.629	+	promoter-TSS (ID=Potri.015G079100.1.v3.0.exon.1;Parent=Potri.015G079100.1.v3.0;pacid=27018576)	Potri.015G079100	-196	41	0.5	82	GO:0003843,GO:0006075,GO:0000148,GO:0016020	AT1G06490.1	glucan synthase-like 7
Chr03	2710047	2710103	Chr03-20	2518.5	0.664	+	Intergenic	Potri.003G022800	-1027	614.5	7.5	81.9333		AT2G45520.1
Chr04	10797798	10797854	Chr04-77	628	0.87	+	Intergenic	Potri.004G116500	5408	245.5	3	81.8333		AT5G56240.1
Chr01	9634469	9634525	Chr01-14	1442.8	0.783	+	Intergenic	Potri.001G120000	-2990	327	4	81.75	GO:0005515	AT2G19520.1	Transducin family protein / WD-40 repeat family protein
Chr16	1351617	1351673	Chr16-5	2849.5	0.662	+	promoter-TSS (ID=Potri.016G024000.1.v3.0.exon.1;Parent=Potri.016G024000.1.v3.0;pacid=27011573)	Potri.016G024000	-690	653	8	81.625	GO:0016491,GO:0008152	AT3G01980.1	NAD(P)-binding Rossmann-fold superfamily protein
Chr02	7303413	7303469	Chr02-38	695.9	0.63	+	TTS (ID=Potri.002G101000.1.v3.0.exon.1;Parent=Potri.002G101000.1.v3.0;pacid=27022878)	Potri.002G101000	366	163	2	81.5		AT3G11600.1
Chr03	764561	764617	Chr03-91	362.8	0.575	+	Intergenic	Potri.003G009600	-1199	81.5	1	81.5	GO:0003676	AT2G05160.1	CCCH-type zinc fingerfamily protein with RNA-binding domain
Chr03	18291311	18291367	Chr03-132	348	0.673	+	TTS (ID=Potri.003G173600.1.v3.0.exon.2;Parent=Potri.003G173600.1.v3.0;pacid=26998104)	Potri.003G173600	288	81.5	1	81.5	GO:0005515,GO:0030528,GO:0003697	AT2G32700.6	LEUNIG_homolog
Chr04	3217070	3217126	Chr04-43	517.7	0.688	+	promoter-TSS (ID=Potri.004G042200.1.v3.0.exon.3;Parent=Potri.004G042200.1.v3.0;pacid=26992581)	Potri.004G042200	-605	121.5	1.5	81		AT1G29050.1	TRICHOME BIREFRINGENCE-LIKE 38
Chr18	4384392	4384448	Chr18-47	339.5	0.874	+	Intergenic	Potri.018G046800	3668	81	1	81	GO:0004672,GO:0005524,GO:0006468	AT1G70740.1	Protein kinase superfamily protein
Chr01	39411461	39411517	Chr01-361	186.7	0.703	+	Intergenic	Potri.001G378300	-10190	40.5	0.5	81	GO:0016758,GO:0008152	AT5G17050.1	UDP-glucosyl transferase 78D2
Chr10	18323192	18323248	Chr10-192	176.1	0.646	+	promoter-TSS (ID=Potri.010G187000.1.v3.0.exon.4;Parent=Potri.010G187000.1.v3.0;pacid=26981347)	Potri.010G187000	-198	40.5	0.5	81		AT1G15130.1	Endosomal targeting BRO1-like domain-containing protein
Chr05	17776199	17776255	Chr05-223	176.1	0.694	+	Intergenic	Potri.005G167800	-18470	40.5	0.5	81	GO:0016491,GO:0006520,GO:0055114	AT5G18170.1	glutamate dehydrogenase 1
Chr05	24606506	24606562	Chr05-224	176.1	0.656	+	promoter-TSS (ID=Potri.005G239800.1.v3.0.exon.2;Parent=Potri.005G239800.1.v3.0;pacid=27027390)	Potri.005G239800	-212	40.5	0.5	81		AT2G29420.1	glutathione S-transferase tau 7
Chr09	12810095	12810151	Chr09-138	174	0.637	+	Intergenic	Potri.009G168500	-3849	40.5	0.5	81		AT2G01050.1	zinc ion binding;nucleic acid binding
Chr14	16495168	16495224	Chr14-148	174	0.8	+	promoter-TSS (ID=Potri.014G186700.1.v3.0.exon.2;Parent=Potri.014G186700.1.v3.0;pacid=27033199)	Potri.014G186700	-751	40.5	0.5	81		AT4G17486.1	PPPDE putative thiol peptidase family protein
Chr11	17384813	17384869	Chr11-28	1508.6	0.644	+	promoter-TSS (ID=Potri.011G155700.1.v3.0.exon.1;Parent=Potri.011G155700.1.v3.0;pacid=27002291)	Potri.011G155700	-329	364	4.5	80.8889	GO:0016757	AT2G41640.1	Glycosyltransferase family 61 protein
Chr07	1591204	1591260	Chr07-27	698.1	0.677	+	promoter-TSS (ID=Potri.007G021000.4.v3.0.exon.5;Parent=Potri.007G021000.4.v3.0;pacid=27015060)	Potri.007G021000	-142	161	2	80.5	GO:0005515	AT1G20670.1	DNA-binding bromodomain-containing protein
Chr01	4422431	4422487	Chr01-196	348	0.715	+	promoter-TSS (ID=Potri.001G058200.1.v3.0.exon.2;Parent=Potri.001G058200.1.v3.0;pacid=27043953)	Potri.001G058200	-254	80.5	1	80.5		AT3G02160.1	Bromodomain transcription factor
Chr08	6461173	6461229	Chr08-9	1587.1	0.739	+	promoter-TSS (ID=Potri.008G101700.1.v3.0.exon.3;Parent=Potri.008G101700.1.v3.0;pacid=27037998)	Potri.008G101700	116	362	4.5	80.4444	GO:0004455,GO:0009082,GO:0055114,GO:0008652,GO:0016491	AT3G58610.1	ketol-acid reductoisomerase
Chr04	21515166	21515222	Chr04-22	698.1	0.621	+	promoter-TSS (ID=Potri.004G206200.1.v3.0.exon.1;Parent=Potri.004G206200.1.v3.0;pacid=26989636)	Potri.004G206200	-6	160.5	2	80.25		AT1G17147.1	VQ motif-containing protein
Chr06	16709922	16709978	Chr06-39	732	0.702	+	Intergenic	Potri.006G165200	10536	160	2	80		AT4G10330.1	glycine-rich protein
Chr05	18998369	18998425	Chr05-38	679	0.745	+	Intergenic	Potri.005G174400	1999	160	2	80	GO:0016624,GO:0008152,GO:0003824	AT4G15560.1	Deoxyxylulose-5-phosphate synthase
Chr05	1550055	1550111	Chr05-129	364.9	0.685	+	promoter-TSS (ID=Potri.005G019800.2.v3.0.exon.2;Parent=Potri.005G019800.2.v3.0;pacid=27028204)	Potri.005G019800	79	80	1	80	GO:0003677,GO:0003700,GO:0016987,GO:0006352,GO:0006355	AT5G13730.1	sigma factor 4
Chr19	6992035	6992091	Chr19-96	180.4	0.726	+	Intergenic	Potri.019G048300	-35754	40	0.5	80	GO:0008725,GO:0006284	AT5G44680.1	DNA glycosylase superfamily protein
Chr06	14909018	14909074	Chr06-259	178.2	0.586	+	TTS (ID=Potri.006G158700.1.v3.0.exon.3;Parent=Potri.006G158700.1.v3.0;pacid=27005651)	Potri.006G158700	975	40	0.5	80	GO:0030528,GO:0006355	AT5G62610.1	basic helix-loop-helix (bHLH) DNA-binding superfamily protein
Chr11	8105747	8105803	Chr11-138	178.2	0.667	+	promoter-TSS (ID=Potri.011G081200.1.v3.0.exon.2;Parent=Potri.011G081200.1.v3.0;pacid=27001121)	Potri.011G081200	-106	40	0.5	80		AT2G28330.1
Chr10	6274313	6274369	Chr10-210	171.9	0.675	+	Intergenic	Potri.010G036300	4032	40	0.5	80		AT4G34860.1	Plant neutral invertase family protein
Chr01	26575320	26575376	Chr01-25	1046	0.639	+	promoter-TSS (ID=Potri.001G256100.2.v3.0.exon.2;Parent=Potri.001G256100.2.v3.0;pacid=27044710)	Potri.001G256100	-57	239.5	3	79.8333	GO:0004499,GO:0050660,GO:0050661,GO:0055114,GO:0016491	AT5G25620.1	Flavin-binding monooxygenase family protein
Chr10	21763383	21763439	Chr10-41	2781.6	0.663	+	promoter-TSS (ID=Potri.010G239200.1.v3.0.exon.2;Parent=Potri.010G239200.1.v3.0;pacid=26983056)	Potri.010G239300	593	878	11	79.8182
Chr08	7926770	7926826	Chr08-73	354.3	0.676	+	TTS (ID=Potri.008G121500.1.v3.0.exon.1;Parent=Potri.008G121500.1.v3.0;pacid=27037160)	Potri.008G121500	1086	79.5	1	79.5	GO:0010333,GO:0016829,GO:0008152,GO:0000287	AT4G02780.1	Terpenoid cyclases/Protein prenyltransferases superfamily protein
Chr06	22891528	22891584	Chr06-133	337.4	0.654	+	promoter-TSS (ID=Potri.006G215700.1.v3.0.exon.3;Parent=Potri.006G215700.1.v3.0;pacid=27005341)	Potri.006G215700	-453	79.5	1	79.5	GO:0006605,GO:0006886,GO:0016020	AT5G50460.1	secE/sec61-gamma protein transport protein
Chr08	4282452	4282508	Chr08-21	3719.5	0.69	+	promoter-TSS (ID=Potri.008G069700.4.v3.0.exon.4;Parent=Potri.008G069700.4.v3.0;pacid=27037717)	Potri.008G069700	-114	834.5	10.5	79.4762		AT3G20600.1	Late embryogenesis abundant (LEA) hydroxyproline-rich glycoprotein family
Chr10	12113724	12113780	Chr10-42	524.1	0.626	+	promoter-TSS (ID=Potri.010G099300.3.v3.0.exon.3;Parent=Potri.010G099300.3.v3.0;pacid=26978816)	Potri.010G099300	-192	119	1.5	79.3333	GO:0005524,GO:0009058,GO:0009396,GO:0004326	AT5G41480.1	Folylpolyglutamate synthetase family protein
Chr10	21792599	21792655	Chr10-55	1014.2	0.704	+	promoter-TSS (ID=Potri.010G240200.1.v3.0.exon.2;Parent=Potri.010G240200.1.v3.0;pacid=26982227)	Potri.010G240200	-429	237.5	3	79.1667	GO:0004672,GO:0005524,GO:0006468	AT1G66910.1	Protein kinase superfamily protein
Chr02	2182778	2182834	Chr02-34	16006.6	0.711	+	promoter-TSS (ID=Potri.002G033800.2.v3.0.exon.1;Parent=Potri.002G033800.2.v3.0;pacid=27021643)	Potri.002G033800	60	3876.5	49	79.1122	GO:0003676	AT1G33470.2	RNA-binding (RRM/RBD/RNP motifs) family protein
Chr08	1618435	1618491	Chr08-10	1215.8	0.738	+	promoter-TSS (ID=Potri.008G029600.1.v3.0.exon.1;Parent=Potri.008G029600.1.v3.0;pacid=27036819)	Potri.008G029600	-192	276.5	3.5	79	GO:0003700,GO:0043565,GO:0046983,GO:0006355	AT5G65210.1	bZIP transcription factor family protein
Chr07	9036410	9036466	Chr07-69	373.4	0.79	+	Intergenic	Potri.007G069200	-3587	79	1	79	GO:0016491,GO:0016706,GO:0055114	AT3G18210.1	2-oxoglutarate (2OG) and Fe(II)-dependent oxygenase superfamily protein
Chr17	10035904	10035960	Chr17-38	367.1	0.625	+	Intergenic	Potri.017G083300	-17421	79	1	79	GO:0008080,GO:0008652,GO:0008152	AT4G37670.2	N-acetyl-l-glutamate synthase 2
Chr05	22698492	22698548	Chr05-102	343.7	0.7	+	Intergenic	Potri.005G213700	-5654	79	1	79		AT5G19260.1	Protein of unknown function (DUF3049)
Chr06	1171487	1171543	Chr06-142	343.7	0.623	+	Intergenic	Potri.006G017700	-1890	79	1	79	GO:0016810,GO:0006807	AT4G08790.1	Nitrilase/cyanide hydratase and apolipoprotein N-acyltransferase family protein
Chr03	5632323	5632379	Chr03-215	186.7	0.706	+	Intergenic	Potri.003G042100	-4986	39.5	0.5	79		AT5G23350.1	GRAM domain-containing protein / ABA-responsive protein-related
Chr15	2316068	2316124	Chr15-123	182.5	0.738	+	promoter-TSS (ID=Potri.015G028700.1.v3.0.exon.1;Parent=Potri.015G028700.1.v3.0;pacid=27018384)	Potri.015G028700	-535	39.5	0.5	79	GO:0003676,GO:0008270	AT3G51950.1	Zinc finger (CCCH-type) family protein / RNA recognition motif (RRM)-containing protein
Chr17	21441	21497	Chr17-103	182.5	0.77	+	promoter-TSS (ID=Potri.017G000500.1.v3.0.exon.1;Parent=Potri.017G000500.1.v3.0;pacid=26984305)	Potri.017G000500	-607	39.5	0.5	79		AT3G52115.1	gamma response gene 1
Chr01	26152309	26152365	Chr01-366	180.4	0.713	+	promoter-TSS (ID=Potri.001G251800.1.v3.0.exon.1;Parent=Potri.001G251800.1.v3.0;pacid=27043436)	Potri.001G251800	-397	39.5	0.5	79		AT2G37870.1	Bifunctional inhibitor/lipid-transfer protein/seed storage 2S albumin superfamily protein
Chr10	4565510	4565566	Chr10-194	174	0.824	+	Intergenic	Potri.010G031000	11471	39.5	0.5	79	GO:0003677,GO:0005634	AT1G14760.2	KNOX Arabidopsis thaliana meinox
Chr13	9099915	9099971	Chr13-129	171.9	0.638	+	promoter-TSS (ID=Potri.013G088400.1.v3.0.exon.1;Parent=Potri.013G088400.1.v3.0;pacid=26995708)	Potri.013G088400	-86	39.5	0.5	79		AT5G40650.1	succinate dehydrogenase 2-2
Chr11	16372251	16372307	Chr11-144	169.7	0.819	+	Intergenic	Potri.011G142700	7458	39.5	0.5	79	GO:0004650,GO:0005975	AT3G07820.1	Pectin lyase-like superfamily protein
Chr01	23252163	23252219	Chr01-448	167.6	0.636	+	Intergenic	Potri.001G223400	11081	39.5	0.5	79		AT3G24515.1	ubiquitin-conjugating enzyme 37
Chr08	5255803	5255859	Chr08-4	2378.5	0.784	+	TTS (ID=Potri.008G083500.2.v3.0.exon.1;Parent=Potri.008G083500.2.v3.0;pacid=27039517)	Potri.008G083500	1246	551	7	78.7143	GO:0004672,GO:0005524,GO:0006468	AT5G35980.1	yeast YAK1-related gene 1
Chr12	4391621	4391677	Chr12-4	2036.9	0.64	+	Intergenic	Potri.012G047300	-25607	471.5	6	78.5833		AT5G10200.1	ARM-repeat/Tetratricopeptide repeat (TPR)-like protein
Chr04	5581708	5581764	Chr04-23	670.5	0.708	+	Intergenic	Potri.004G066600	-2305	157	2	78.5	GO:0004672,GO:0005524,GO:0006468,GO:0005515	AT2G01820.1	Leucine-rich repeat protein kinase family protein
Chr14	3007250	3007306	Chr14-11	3700.4	0.597	+	promoter-TSS (ID=Potri.014G036800.1.v3.0.exon.9;Parent=Potri.014G036800.1.v3.0;pacid=27032262)	Potri.014G036800	-151	862	11	78.3636	GO:0046873,GO:0030001,GO:0055085,GO:0016020	AT2G03620.1	magnesium transporter 3
Chr03	4595739	4595795	Chr03-30	706.5	0.746	+	promoter-TSS (ID=Potri.003G035900.1.v3.0.exon.2;Parent=Potri.003G035900.1.v3.0;pacid=26998933)	Potri.003G035900	-253	156.5	2	78.25		AT4G30710.1	Family of unknown function (DUF566)
Chr01	26224247	26224303	Chr01-42	886.9	0.66	+	Intergenic	Potri.001G252500	1917	195.5	2.5	78.2	GO:0008270	AT3G24800.1	proteolysis 1
Chr06	22322662	22322718	Chr06-36	855.1	0.667	+	promoter-TSS (ID=Potri.006G207900.1.v3.0.exon.7;Parent=Potri.006G207900.1.v3.0;pacid=27005338)	Potri.006G207900	-42	195.5	2.5	78.2	GO:0004672,GO:0005524,GO:0006468	AT1G29730.1	Leucine-rich repeat transmembrane protein kinase
Chr02	6714424	6714480	Chr02-23	2081.5	0.658	+	promoter-TSS (ID=Potri.002G093800.2.v3.0.exon.4;Parent=Potri.002G093800.2.v3.0;pacid=27021270)	Potri.002G093800	-88	468.5	6	78.0833	GO:0000179,GO:0008649,GO:0000154,GO:0008168,GO:0008757,GO:0009312,GO:0009877,GO:0008152	AT1G48600.2	S-adenosyl-L-methionine-dependent methyltransferases superfamily protein
Chr10	20210002	20210058	Chr10-85	343.7	0.653	+	Intergenic	Potri.010G214600	-1074	78	1	78	GO:0003824	AT4G03415.1	Protein phosphatase 2C family protein
Chr11	2266780	2266836	Chr11-73	339.5	0.674	+	TTS (ID=Potri.011G027600.1.v3.0.exon.6;Parent=Potri.011G027600.1.v3.0;pacid=27002712)	Potri.011G027600	846	78	1	78		AT1G78560.1	Sodium Bile acid symporter family
scaffold_3168	18	64	scaffold_3168-1	252.5	0.567	+				39	0.5	78	GO:0030528,GO:0006355	AT3G28857.1	basic helix-loop-helix (bHLH) DNA-binding family protein
Chr06	25622711	25622767	Chr06-235	193.1	0.604	+	promoter-TSS (ID=Potri.006G249800.1.v3.0.exon.11;Parent=Potri.006G249800.1.v3.0;pacid=27007077)	Potri.006G249800	-5	39	0.5	78	GO:0005515	AT5G04240.1	Zinc finger (C2H2 type) family protein / transcription factor jumonji (jmj) family protein
Chr08	11214037	11214093	Chr08-160	178.2	0.656	+	Intergenic	Potri.008G164600	-1633	39	0.5	78	GO:0005515,GO:0005634,GO:0003677	AT1G08620.1	Transcription factor jumonji (jmj) family protein / zinc finger (C5HC2 type) family protein
Chr08	3270348	3270404	Chr08-185	174	0.589	+	promoter-TSS (ID=Potri.008G055200.1.v3.0.exon.1;Parent=Potri.008G055200.1.v3.0;pacid=27038172)	Potri.008G055200	-495	39	0.5	78		AT1G27070.1	5\'-AMP-activated protein kinase-related
Chr01	34211474	34211530	Chr01-436	171.9	0.728	+	TTS (ID=Potri.001G338400.1.v3.0.exon.1;Parent=Potri.001G338400.1.v3.0;pacid=27047713)	Potri.001G338400	779	39	0.5	78
Chr03	3403965	3404021	Chr03-206	169.7	0.856	+	Intergenic	Potri.003G027400	-9403	39	0.5	78		AT1G04555.1
Chr06	14699238	14699294	Chr06-268	167.6	0.693	+	Intergenic	Potri.006G157600	-11320	39	0.5	78		AT3G55580.1	Regulator of chromosome condensation (RCC1) family protein
Chr01	33374585	33374641	Chr01-404	165.5	0.811	+	Intergenic	Potri.001G330200	-2191	39	0.5	78
Chr08	7502741	7502797	Chr08-7	1718.6	0.742	+	Intergenic	Potri.008G116900	-2144	389.5	5	77.9		AT1G58250.1	Golgi-body localisation protein domain ;RNA pol II promoter Fmp27 protein domain
Chr11	517775	517831	Chr11-40	840.2	0.656	+	promoter-TSS (ID=Potri.011G006300.1.v3.0.exon.3;Parent=Potri.011G006300.1.v3.0;pacid=27000843)	Potri.011G006300	18	194.5	2.5	77.8	GO:0004672,GO:0005524,GO:0006468,GO:0004674	AT4G27300.1	S-locus lectin protein kinase family protein
Chr03	11220219	11220275	Chr03-6	1661.3	0.657	+	promoter-TSS (ID=Potri.003G085100.2.v3.0.exon.1;Parent=Potri.003G085100.2.v3.0;pacid=26996899)	Potri.003G085100	41	387.5	5	77.5	GO:0015299,GO:0006812,GO:0055085,GO:0016021	AT3G17630.1	cation/H+ exchanger 19
Chr01	21823888	21823944	Chr01-56	666.2	0.625	+	TTS (ID=Potri.001G215500.1.v3.0.exon.11;Parent=Potri.001G215500.1.v3.0;pacid=27045559)	Potri.001G215500	766	155	2	77.5		AT1G73760.1	RING/U-box superfamily protein
Chr01	34747002	34747058	Chr01-3	5391.4	0.625	+	promoter-TSS (ID=Potri.001G342300.2.v3.0.exon.2;Parent=Potri.001G342300.2.v3.0;pacid=27041970)	Potri.001G342300	-159	1239.5	16	77.4688		AT3G15550.1
Chr16	2202366	2202422	Chr16-30	494.4	0.762	+	Intergenic	Potri.016G036900	-2133	116	1.5	77.3333	GO:0003824,GO:0043169,GO:0005975	AT3G20440.2	Alpha amylase family protein
Chr13	5424400	5424456	Chr13-17	4986.1	0.697	+	Intergenic	Potri.013G067500	8902	1237	16	77.3125
Chr06	7684919	7684975	Chr06-4	3223	0.741	+	Intergenic	Potri.006G099900	-4244	733	9.5	77.1579		AT1G52870.1	Peroxisomal membrane 22 kDa (Mpv17/PMP22) family protein
Chr05	9651871	9651927	Chr05-57	823.2	0.723	+	Intergenic	Potri.005G123900	5735	192.5	2.5	77		AT3G22550.1	Protein of unknown function (DUF581)
Chr07	3305650	3305706	Chr07-71	350.1	0.663	+	Intergenic	Potri.007G040800	5664	77	1	77	GO:0008233,GO:0006465,GO:0005787,GO:0016021	AT2G39960.1	Microsomal signal peptidase 25 kDa subunit (SPC25)
Chr02	18488669	18488725	Chr02-99	333.1	0.763	+	Intergenic	Potri.002G212000	-49603	77	1	77		AT5G35180.2	Protein of unknown function (DUF1336)
Chr14	5708063	5708119	Chr14-54	324.6	0.591	+	Intergenic	Potri.014G070400	-2291	77	1	77	GO:0003723	AT2G20020.1	RNA-binding CRS1 / YhbY (CRM) domain-containing protein
Chr16	1047178	1047234	Chr16-100	186.7	0.584	+	promoter-TSS (ID=Potri.016G019000.1.v3.0.exon.1;Parent=Potri.016G019000.1.v3.0;pacid=27011825)	Potri.016G019000	-6	38.5	0.5	77	GO:0008168	AT3G11480.1	S-adenosyl-L-methionine-dependent methyltransferases superfamily protein
Chr03	11005322	11005378	Chr03-268	174	0.701	+	Intergenic	Potri.003G082400	1824	38.5	0.5	77		AT3G01930.2	Major facilitator superfamily protein
Chr09	9776713	9776769	Chr09-136	169.7	0.723	+	promoter-TSS (ID=Potri.009G115600.1.v3.0.exon.1;Parent=Potri.009G115600.1.v3.0;pacid=26986318)	Potri.009G115600	-98	38.5	0.5	77		AT5G51545.1	low psii accumulation2
Chr04	6552161	6552217	Chr04-202	167.6	0.693	+	promoter-TSS (ID=Potri.004G079100.1.v3.0.exon.6;Parent=Potri.004G079100.1.v3.0;pacid=26990966)	Potri.004G079100	-69	38.5	0.5	77		AT1G80450.1	VQ motif-containing protein
Chr11	494511	494567	Chr11-157	167.6	0.675	+	exon (ID=Potri.011G006000.1.v3.0.exon.2;Parent=Potri.011G006000.1.v3.0;pacid=27002591, exon 1 of 1)	Potri.011G006000	327	38.5	0.5	77	GO:0005515,GO:0004871,GO:0009416	AT5G66560.1	Phototropic-responsive NPH3 family protein
Chr01	27464155	27464211	Chr01-458	163.4	0.813	+	Intergenic	Potri.001G266700	-1188	38.5	0.5	77	GO:0003700,GO:0043565,GO:0046983,GO:0006355,GO:0003677,GO:0006351,GO:0005634	AT4G36730.1	G-box binding factor 1
scaffold_24	482613	482669	scaffold_24-4	163.4	0.82	+	Intergenic	Potri.T009600	-2589	38.5	0.5	77
Chr01	46887628	46887684	Chr01-468	159.1	0.667	+	Intergenic	Potri.001G437500	4114	38.5	0.5	77	GO:0055085,GO:0016021	AT1G53210.1	sodium/calcium exchanger family protein / calcium-binding EF hand family protein
Chr03	15020351	15020407	Chr03-84	498.6	0.712	+	promoter-TSS (ID=Potri.003G130500.1.v3.0.exon.4;Parent=Potri.003G130500.1.v3.0;pacid=26997413)	Potri.003G130500	11	115	1.5	76.6667
Chr12	9943193	9943249	Chr12-59	335.2	0.712	+	promoter-TSS (ID=Potri.012G074300.2.v3.0.exon.1;Parent=Potri.012G074300.2.v3.0;pacid=27051042)	Potri.012G074300	-23	76.5	1	76.5
scaffold_238	11020	11076	scaffold_238-1	331	0.705	+	TTS (ID=Potri.T129000.1.v3.0.exon.6;Parent=Potri.T129000.1.v3.0;pacid=27040104)	Potri.T129000	1422	76.5	1	76.5	GO:0016491,GO:0016706,GO:0055114	AT1G15550.1	gibberellin 3-oxidase 1
Chr13	14268270	14268326	Chr13-74	324.6	0.679	+	Intergenic	Potri.013G131200	3808	76.5	1	76.5		AT2G45420.1	LOB domain-containing protein 18
Chr18	4317812	4317868	Chr18-6	1020.6	0.762	+	promoter-TSS (ID=Potri.018G046500.1.v3.0.exon.1;Parent=Potri.018G046500.1.v3.0;pacid=27011458)	Potri.018G046500	-32	228.5	3	76.1667	GO:0003677,GO:0006355	AT4G28500.1	NAC domain containing protein 73
Chr11	16700375	16700431	Chr11-4	3912.5	0.97	+	Intergenic	Potri.011G147600	-2584	913	12	76.0833		AT2G19390.1
Chr14	7050090	7050146	Chr14-48	505	0.71	+	Intergenic	Potri.014G089600	-2936	114	1.5	76		AT3G58000.1	VQ motif-containing protein
Chr01	39214115	39214171	Chr01-212	331	0.623	+	Intergenic	Potri.001G376400	-11844	76	1	76		AT5G57340.2
Chr11	3609817	3609873	Chr11-120	182.5	0.674	+	TTS (ID=Potri.011G042500.1.v3.0.exon.9;Parent=Potri.011G042500.1.v3.0;pacid=27001562)	Potri.011G042500	556	38	0.5	76		AT5G38790.1
Chr04	14475837	14475893	Chr04-184	178.2	0.693	+	Intergenic	Potri.004G129900	12849	38	0.5	76	GO:0003677,GO:0004003,GO:0005524	AT1G20720.1	RAD3-like DNA-binding helicase protein
Chr03	13250265	13250321	Chr03-203	171.9	0.65	+	promoter-TSS (ID=Potri.003G108400.2.v3.0.exon.2;Parent=Potri.003G108400.2.v3.0;pacid=26998990)	Potri.003G108400	-84	38	0.5	76	GO:0003723	AT2G47230.1	DOMAIN OF UNKNOWN FUNCTION 724 6
Chr13	5522137	5522193	Chr13-142	169.7	0.684	+	promoter-TSS (ID=Potri.013G068400.4.v3.0.exon.17;Parent=Potri.013G068400.4.v3.0;pacid=26994251)	Potri.013G068400	-146	38	0.5	76	GO:0005215,GO:0006810,GO:0016020,GO:0055085,GO:0016021	AT5G64500.1	Major facilitator superfamily protein
Chr12	9955880	9955936	Chr12-129	165.5	0.75	+	Intergenic	Potri.012G074400	-5595	38	0.5	76	GO:0005783	AT5G58000.1	Reticulon family protein
Chr09	11032789	11032845	Chr09-153	163.4	0.694	+	Intergenic	Potri.009G137400	-1178	38	0.5	76	GO:0005515	AT1G04300.1	TRAF-like superfamily protein
Chr07	14208072	14208128	Chr07-158	161.3	0.739	+	TTS (ID=Potri.007G125100.1.v3.0.exon.3;Parent=Potri.007G125100.1.v3.0;pacid=27014492)	Potri.007G125100	1493	38	0.5	76	GO:0004553,GO:0005975	AT1G30080.1	Glycosyl hydrolase superfamily protein
Chr14	11573606	11573662	Chr14-8	1137.3	0.819	+	promoter-TSS (ID=Potri.014G150700.1.v3.0.exon.1;Parent=Potri.014G150700.1.v3.0;pacid=27035396)	Potri.014G150700	-40	265.5	3.5	75.8571	GO:0005525,GO:0007264,GO:0005634,GO:0005737,GO:0005622	AT3G54840.1	Ras-related small GTP-binding family protein
Chr01	19617458	19617514	Chr01-78	659.9	0.663	+	Intergenic	Potri.001G200700	-14640	151.5	2	75.75		AT4G00150.1	GRAS family transcription factor
Chr04	13676752	13676808	Chr04-14	5406.3	0.628	+	Intergenic	Potri.004G128400	-46738	1779.5	23.5	75.7234	GO:0008168,GO:0008152	AT5G14430.1	S-adenosyl-L-methionine-dependent methyltransferases superfamily protein
Chr02	21408631	21408687	Chr02-9	1461.9	0.613	+	TTS (ID=Potri.002G225300.1.v3.0.exon.2;Parent=Potri.002G225300.1.v3.0;pacid=27020459)	Potri.002G225300	856	340.5	4.5	75.6667	GO:0005515	AT5G07590.1	Transducin/WD40 repeat-like superfamily protein
Chr12	9109973	9110029	Chr12-14	829.6	0.631	+	Intergenic	Potri.012G068600	-7348	189	2.5	75.6
Chr01	18809859	18809915	Chr01-40	4837.6	0.7	+	promoter-TSS (ID=Potri.001G196900.1.v3.0.exon.1;Parent=Potri.001G196900.1.v3.0;pacid=27047622)	Potri.001G196900	-498	1133	15	75.5333		AT5G43500.2	actin-related protein 9
Chr18	2680540	2680596	Chr18-39	331	0.688	+	TTS (ID=Potri.018G033600.1.v3.0.exon.2;Parent=Potri.018G033600.1.v3.0;pacid=27009359)	Potri.018G033600	930	75.5	1	75.5	GO:0005515	AT1G12910.1	Transducin/WD40 repeat-like superfamily protein
Chr05	24202576	24202632	Chr05-105	328.9	0.668	+	TTS (ID=Potri.005G234200.1.v3.0.exon.2;Parent=Potri.005G234200.1.v3.0;pacid=27027921)	Potri.005G234200	1016	75.5	1	75.5	GO:0016760,GO:0030244,GO:0016020	AT5G44030.1	cellulose synthase A4
Chr11	11669424	11669480	Chr11-70	322.5	0.691	+	promoter-TSS (ID=Potri.011G095800.2.v3.0.exon.1;Parent=Potri.011G095800.2.v3.0;pacid=27001012)	Potri.011G095800	-519	75.5	1	75.5	GO:0005509,GO:0015979,GO:0009523,GO:0009654,GO:0019898	AT1G06680.1	photosystem II subunit P-1
Chr02	11604527	11604583	Chr02-114	314	0.7	+	promoter-TSS (ID=Potri.002G153900.1.v3.0.exon.1;Parent=Potri.002G153900.1.v3.0;pacid=27020962)	Potri.002G153900	-792	75.5	1	75.5		AT3G01680.1
Chr01	9210377	9210433	Chr01-1	12172.6	0.922	+	Intergenic	Potri.001G115200	-1393	2783	37	75.2162		AT2G32980.1
Chr08	12357630	12357686	Chr08-6	1758.9	0.84	+	promoter-TSS (ID=Potri.008G181200.1.v3.0.exon.1;Parent=Potri.008G181200.1.v3.0;pacid=27039531)	Potri.008G181200	-480	413.5	5.5	75.1818		AT4G39380.1
Chr07	3923758	3923814	Chr07-21	1512.8	0.713	+	Intergenic	Potri.007G044600	-5494	338	4.5	75.1111		AT5G60520.1	Late embryogenesis abundant (LEA) protein-related
Chr17	813549	813605	Chr17-40	477.4	0.679	+	Intergenic	Potri.017G009600	-3272	112.5	1.5	75		AT1G68490.1
Chr06	17190575	17190631	Chr06-143	320.4	0.652	+	Intergenic	Potri.006G167200	-10380	75	1	75		AT2G01570.1	GRAS family transcription factor family protein
Chr11	5254068	5254124	Chr11-69	318.3	0.739	+	Intergenic	Potri.011G058700	2982	75	1	75	GO:0005515	AT2G44900.1	ARABIDILLO-1
Chr01	20733435	20733491	Chr01-410	180.4	0.682	+	promoter-TSS (ID=Potri.001G206900.1.v3.0.exon.3;Parent=Potri.001G206900.1.v3.0;pacid=27045883)	Potri.001G206900	-267	37.5	0.5	75		AT5G43260.1	chaperone protein dnaJ-related
Chr03	20552648	20552704	Chr03-204	176.1	0.819	+	Intergenic	Potri.003G204500	7859	37.5	0.5	75	GO:0006355,GO:0005634,GO:0003677,GO:0009725	AT5G20730.2	Transcriptional factor B3 family protein / auxin-responsive factor AUX/IAA-related
scaffold_1301	3282	3338	scaffold_1301-1	169.7	0.617	+				37.5	0.5	75
scaffold_124	45890	45946	scaffold_124-1	169.7	0.683	+	Intergenic	Potri.T093400	-2871	37.5	0.5	75	GO:0003824,GO:0051536,GO:0051539,GO:0016992,GO:0009107	AT2G20860.1	lipoic acid synthase 1
Chr01	7314951	7315007	Chr01-453	161.3	0.667	+	Intergenic	Potri.001G092800	2554	37.5	0.5	75		AT1G62680.1	Pentatricopeptide repeat (PPR) superfamily protein
Chr02	12696052	12696108	Chr02-249	157	0.871	+	promoter-TSS (ID=Potri.002G168100.1.v3.0.exon.1;Parent=Potri.002G168100.1.v3.0;pacid=27021538)	Potri.002G168100	-558	37.5	0.5	75	GO:0005506,GO:0009055,GO:0016705,GO:0020037,GO:0055114	AT2G45550.1	cytochrome P450, family 76, subfamily C, polypeptide 4
Chr10	22103265	22103321	Chr10-209	157	0.736	+	promoter-TSS (ID=Potri.010G247200.2.v3.0.exon.2;Parent=Potri.010G247200.2.v3.0;pacid=26978871)	Potri.010G247200	-299	37.5	0.5	75	GO:0007034,GO:0030904	AT1G48550.1	Vacuolar protein sorting-associated protein 26
Chr01	12515623	12515679	Chr01-39	653.5	0.748	+	Intergenic	Potri.001G151700	-6277	149.5	2	74.75	GO:0003735,GO:0006412,GO:0005622,GO:0005840	AT5G65220.1	Ribosomal L29 family protein
Chr03	13711941	13711997	Chr03-36	638.7	0.647	+	promoter-TSS (ID=Potri.003G113400.2.v3.0.exon.1;Parent=Potri.003G113400.2.v3.0;pacid=26998622)	Potri.003G113400	-705	149.5	2	74.75	GO:0005515	AT2G47450.1	chloroplast signal recognition particle component (CAO)
Chr14	10550299	10550355	Chr14-56	507.1	0.703	+	promoter-TSS (ID=Potri.014G138000.1.v3.0.exon.6;Parent=Potri.014G138000.1.v3.0;pacid=27035068)	Potri.014G138000	40	112	1.5	74.6667		AT5G44090.1	Calcium-binding EF-hand family protein
Chr08	16808384	16808440	Chr08-71	766	0.752	+	Intergenic	Potri.008G213300	-6016	186.5	2.5	74.6		AT2G15290.1	translocon at inner membrane of chloroplasts 21
Chr08	7637793	7637849	Chr08-40	1913.8	0.674	+	Intergenic	Potri.008G118500	1790	447.5	6	74.5833	GO:0016020	AT1G68470.1	Exostosin family protein
Chr03	13123653	13123709	Chr03-15	952.7	0.857	+	TTS (ID=Potri.003G107400.2.v3.0.exon.1;Parent=Potri.003G107400.2.v3.0;pacid=26997477)	Potri.003G107400	664	223.5	3	74.5
Chr04	19614184	19614240	Chr04-46	483.8	0.655	+	TTS (ID=Potri.004G178600.6.v3.0.exon.2;Parent=Potri.004G178600.6.v3.0;pacid=26991698)	Potri.004G178600	136	111.5	1.5	74.3333		AT5G58960.1	Plant protein of unknown function (DUF641)
Chr08	3306181	3306237	Chr08-50	876.3	0.702	+	TTS (ID=Potri.008G055900.1.v3.0.exon.3;Parent=Potri.008G055900.1.v3.0;pacid=27039237)	Potri.008G055900	187	185.5	2.5	74.2	GO:0008378,GO:0005795	AT3G09020.1	alpha 1,4-glycosyltransferase family protein
Chr17	4720337	4720393	Chr17-9	4186.2	0.645	+	TTS (ID=Potri.017G053900.1.v3.0.exon.5;Parent=Potri.017G053900.1.v3.0;pacid=26985660)	Potri.017G053900	957	964.5	13	74.1923		AT5G51640.1	Plant protein of unknown function (DUF828)
Chr18	13002391	13002447	Chr18-24	479.5	0.802	+	promoter-TSS (ID=Potri.018G102500.1.v3.0.exon.1;Parent=Potri.018G102500.1.v3.0;pacid=27010727)	Potri.018G102500	-588	111	1.5	74	GO:0004252,GO:0016021	AT3G07950.1	rhomboid protein-related
Chr04	5705024	5705080	Chr04-64	316.1	0.738	+	Intergenic	Potri.004G068700	2891	74	1	74		AT1G32690.1
Chr01	16014190	16014246	Chr01-187	314	0.603	+	Intergenic	Potri.001G183400	-1963	74	1	74	GO:0008270	AT3G53690.1	RING/U-box superfamily protein
Chr11	2510725	2510781	Chr11-158	169.7	0.696	+	Intergenic	Potri.011G030100	9531	37	0.5	74	GO:0005515,GO:0004672,GO:0005524,GO:0006468	AT5G13530.1	protein kinases;ubiquitin-protein ligases
Chr11	2062802	2062858	Chr11-153	167.6	0.652	+	Intergenic	Potri.011G025000	6195	37	0.5	74		AT5G45610.1	protein dimerizations
Chr09	1467449	1467505	Chr09-141	163.4	0.654	+	Intergenic	Potri.009G008300	9206	37	0.5	74
Chr06	26571425	26571481	Chr06-335	159.1	0.793	+	promoter-TSS (ID=Potri.006G262700.1.v3.0.exon.2;Parent=Potri.006G262700.1.v3.0;pacid=27007674)	Potri.006G262700	-81	37	0.5	74		AT5G15300.1	Pentatricopeptide repeat (PPR) superfamily protein
Chr03	21540675	21540731	Chr03-231	154.9	0.617	+	TTS (ID=Potri.003G220000.1.v3.0.exon.3;Parent=Potri.003G220000.1.v3.0;pacid=27000282)	Potri.003G220000	954	37	0.5	74		AT5G01450.1	RING/U-box superfamily protein
Chr05	9428734	9428790	Chr05-75	1368.5	0.634	+	TTS (ID=Potri.005G120900.1.v3.0.exon.8;Parent=Potri.005G120900.1.v3.0;pacid=27030963)	Potri.005G120900	247	295.5	4	73.875		AT4G13710.1	Pectin lyase-like superfamily protein
Chr03	8641414	8641470	Chr03-3	5336.2	0.624	+	promoter-TSS (ID=Potri.003G058600.1.v3.0.exon.1;Parent=Potri.003G058600.1.v3.0;pacid=26996494)	Potri.003G058600	-732	1218.5	16.5	73.8485	GO:0004553,GO:0005975	AT4G18340.1	Glycosyl hydrolase superfamily protein
Chr06	26607787	26607843	Chr06-9	1417.3	0.666	+	Intergenic	Potri.006G263200	-1571	331.5	4.5	73.6667	GO:0003677,GO:0006355	AT2G46770.1	NAC (No Apical Meristem) domain transcriptional regulator superfamily protein
Chr06	6739495	6739551	Chr06-42	838.1	0.657	+	TTS (ID=Potri.006G088300.1.v3.0.exon.6;Parent=Potri.006G088300.1.v3.0;pacid=27007861)	Potri.006G088300	698	184	2.5	73.6		AT3G63530.1	RING/U-box superfamily protein
Chr12	5429658	5429714	Chr12-81	324.6	0.795	+	Intergenic	Potri.012G053600	4672	73.5	1	73.5	GO:0004345,GO:0050661,GO:0006006,GO:0055114	AT1G09420.2	glucose-6-phosphate dehydrogenase 4
Chr13	8474684	8474740	Chr13-58	316.1	0.701	+	promoter-TSS (ID=Potri.013G087400.2.v3.0.exon.2;Parent=Potri.013G087400.2.v3.0;pacid=26994866)	Potri.013G087400	-173	73.5	1	73.5	GO:0004571,GO:0005509,GO:0016020	AT1G51590.1	alpha-mannosidase 1
Chr01	16943419	16943475	Chr01-4	16664.3	0.86	+	promoter-TSS (ID=Potri.001G189800.2.v3.0.exon.1;Parent=Potri.001G189800.2.v3.0;pacid=27045314)	Potri.001G189800	-605	3414.5	46.5	73.4301	GO:0008080,GO:0008152	AT2G30090.1	Acyl-CoA N-acyltransferases (NAT) superfamily protein
Chr01	20880944	20881000	Chr01-30	2771	0.666	+	Intergenic	Potri.001G208400	3637	621.5	8.5	73.1176	GO:0004672,GO:0005524,GO:0006468,GO:0005515	AT5G62710.1	Leucine-rich repeat protein kinase family protein
Chr05	15349505	15349561	Chr05-12	2677.7	0.674	+	TTS (ID=Potri.005G155600.2.v3.0.exon.14;Parent=Potri.005G155600.2.v3.0;pacid=27030477)	Potri.005G155600	675	620.5	8.5	73
Chr01	14437757	14437813	Chr01-154	464.7	0.738	+	Intergenic	Potri.001G170500	1624	109.5	1.5	73		AT4G20740.1	Pentatricopeptide repeat (PPR-like) superfamily protein
Chr05	5580777	5580833	Chr05-154	348	0.811	+	promoter-TSS (ID=Potri.005G076200.3.v3.0.exon.3;Parent=Potri.005G076200.3.v3.0;pacid=27027412)	Potri.005G076200	-451	73	1	73		AT3G02120.1	hydroxyproline-rich glycoprotein family protein
Chr08	8318552	8318608	Chr08-100	326.8	0.699	+	Intergenic	Potri.008G127600	-2703	73	1	73	GO:0004672,GO:0005524,GO:0006468	AT3G59110.1	Protein kinase superfamily protein
Chr06	17211533	17211589	Chr06-149	322.5	0.686	+	Intergenic	Potri.006G167300	-15906	73	1	73	GO:0006367,GO:0005672,GO:0003702	AT1G07470.1	Transcription factor IIA, alpha/beta subunit
Chr01	25525897	25525953	Chr01-156	322.5	0.642	+	promoter-TSS (ID=Potri.001G244400.1.v3.0.exon.1;Parent=Potri.001G244400.1.v3.0;pacid=27045899)	Potri.001G244400	-125	73	1	73		AT2G28310.1	Protein of unknown function (DUF707)
Chr12	9932897	9932953	Chr12-139	163.4	0.771	+	Intergenic	Potri.012G074000	3226	36.5	0.5	73	GO:0005506,GO:0009055,GO:0016705,GO:0020037,GO:0055114	AT2G23180.1	cytochrome P450, family 96, subfamily A, polypeptide 1
Chr17	9003060	9003116	Chr17-119	163.4	0.664	+	Intergenic	Potri.017G076600	-4678	36.5	0.5	73	GO:0016757	AT2G38650.1	galacturonosyltransferase 7
Chr04	22192621	22192677	Chr04-206	163.4	0.682	+	promoter-TSS (ID=Potri.004G214500.1.v3.0.exon.1;Parent=Potri.004G214500.1.v3.0;pacid=26990073)	Potri.004G214500	-808	36.5	0.5	73	GO:0003677,GO:0006355	AT1G79580.1	NAC (No Apical Meristem) domain transcriptional regulator superfamily protein
Chr09	1117315	1117371	Chr09-144	159.1	0.699	+	promoter-TSS (ID=Potri.009G006000.1.v3.0.exon.2;Parent=Potri.009G006000.1.v3.0;pacid=26988648)	Potri.009G006000	-619	36.5	0.5	73	GO:0005515	AT1G24300.1	GYF domain-containing protein
Chr03	16072158	16072214	Chr03-265	157	0.794	+	Intergenic	Potri.003G144400	-1660	36.5	0.5	73		AT5G02970.1	alpha/beta-Hydrolases superfamily protein
Chr03	5300031	5300087	Chr03-225	154.9	0.734	+	promoter-TSS (ID=Potri.003G040000.1.v3.0.exon.6;Parent=Potri.003G040000.1.v3.0;pacid=26997529)	Potri.003G040000	-207	36.5	0.5	73	GO:0030528,GO:0006355	AT5G57150.1	basic helix-loop-helix (bHLH) DNA-binding superfamily protein
Chr11	18362457	18362513	Chr11-8	1294.3	0.751	+	Intergenic	Potri.011G168200	1159	291	4	72.75	GO:0003677,GO:0003918,GO:0006265,GO:0005694,GO:0003917	AT5G55310.1	DNA topoisomerase 1 beta
Chr09	7587582	7587638	Chr09-43	483.8	0.649	+	Intergenic	Potri.009G079000	-7414	109	1.5	72.6667		AT1G29530.1
Chr18	16631295	16631351	Chr18-45	328.9	0.644	+	promoter-TSS (ID=Potri.018G147200.1.v3.0.exon.1;Parent=Potri.018G147200.1.v3.0;pacid=27010750)	Potri.018G147200	64	72.5	1	72.5	GO:0043531,GO:0006915,GO:0005524	AT3G14470.1	NB-ARC domain-containing disease resistance protein
Chr16	10744592	10744648	Chr16-61	326.8	0.67	+	Intergenic	Potri.016G106200	-4709	72.5	1	72.5		AT5G58040.1	homolog of yeast FIP1 [V]
Chr04	20521146	20521202	Chr04-111	311.9	0.691	+	Intergenic	Potri.004G190500	-1667	72.5	1	72.5		AT5G15630.1	COBRA-like extracellular glycosyl-phosphatidyl inositol-anchored protein family
Chr12	1561911	1561967	Chr12-7	1708	0.795	+	Intergenic	Potri.012G016200	-2789	398.5	5.5	72.4545		AT3G53700.1	Pentatricopeptide repeat (PPR) superfamily protein
Chr06	25779969	25780025	Chr06-12	14693.2	0.65	+	Intergenic	Potri.006G252300	2570	3548.5	49	72.4184	GO:0008168,GO:0008276,GO:0006479,GO:0005737,GO:0008152	AT3G12270.1	protein arginine methyltransferase 3
Chr03	12191522	12191578	Chr03-42	1795	0.732	+	Intergenic	Potri.003G095000	3468	434.5	6	72.4167	GO:0009058	AT4G18240.1	starch synthase 4
Chr09	11757662	11757718	Chr09-6	9085.4	0.69	+	TTS (ID=Potri.009G149100.1.v3.0.exon.11;Parent=Potri.009G149100.1.v3.0;pacid=26986260)	Potri.009G149100	839	2098	29	72.3448		AT4G15180.1	SET domain protein 2
Chr01	34766312	34766368	Chr01-100	923	0.689	+	Intergenic	Potri.001G342500	-2153	217	3	72.3333		AT3G21710.2
Chr06	5374672	5374728	Chr06-94	488	0.654	+	Intergenic	Potri.006G072400	1440	108.5	1.5	72.3333		AT1G61240.1	Protein of unknown function (DUF707)
Chr08	16535658	16535714	Chr08-33	3515.8	0.698	+	promoter-TSS (ID=Potri.008G211500.1.v3.0.exon.2;Parent=Potri.008G211500.1.v3.0;pacid=27038876)	Potri.008G211500	-117	793.5	11	72.1364	GO:0003723,GO:0003743,GO:0006413	AT4G11175.1	Nucleic acid-binding, OB-fold-like protein
Chr10	451218	451274	Chr10-5	1642.2	0.899	+	Intergenic	Potri.010G004800	4392	360	5	72	GO:0004672,GO:0005524,GO:0006468	AT1G52540.1	Protein kinase superfamily protein
Chr05	11374314	11374370	Chr05-39	768.1	0.645	+	promoter-TSS (ID=Potri.005G137600.1.v3.0.exon.2;Parent=Potri.005G137600.1.v3.0;pacid=27028912)	Potri.005G137600	-35	180	2.5	72
Chr02	5559540	5559596	Chr02-85	645	0.677	+	promoter-TSS (ID=Potri.002G080000.1.v3.0.exon.3;Parent=Potri.002G080000.1.v3.0;pacid=27020940)	Potri.002G080000	-38	144	2	72		AT5G56900.2	CwfJ-like family protein / zinc finger (CCCH-type) family protein
Chr10	93612	93668	Chr10-52	488	0.709	+	promoter-TSS (ID=Potri.010G000700.1.v3.0.exon.1;Parent=Potri.010G000700.1.v3.0;pacid=26978712)	Potri.010G000700	-202	108	1.5	72	GO:0003700,GO:0043565,GO:0006355	AT4G31550.1	WRKY DNA-binding protein 11
Chr08	10987156	10987212	Chr08-75	324.6	0.729	+	TTS (ID=Potri.008G161500.1.v3.0.exon.4;Parent=Potri.008G161500.1.v3.0;pacid=27037687)	Potri.008G161500	157	72	1	72	GO:0004672,GO:0005524,GO:0006468,GO:0005515	AT3G47570.1	Leucine-rich repeat protein kinase family protein
Chr06	20756905	20756961	Chr06-263	178.2	0.615	+	Intergenic	Potri.006G193200	-1187	36	0.5	72	GO:0022857,GO:0055085,GO:0016021	AT3G18830.1	polyol/monosaccharide transporter 5
Chr10	22168795	22168851	Chr10-228	165.5	0.705	+	TTS (ID=Potri.010G248100.1.v3.0.exon.2;Parent=Potri.010G248100.1.v3.0;pacid=26978906)	Potri.010G248100	1064	36	0.5	72
Chr06	22367472	22367528	Chr06-285	161.3	0.664	+	Intergenic	Potri.006G208400	-5377	36	0.5	72	GO:0015238,GO:0015297,GO:0006855,GO:0055085,GO:0016020	AT1G58340.1	MATE efflux family protein
Chr17	14101858	14101914	Chr17-110	157	0.784	+	Intergenic	Potri.017G130300	-1448	36	0.5	72		AT3G07600.1	Heavy metal transport/detoxification superfamily protein
Chr14	5691388	5691444	Chr14-146	154.9	0.765	+	TTS (ID=Potri.014G070200.1.v3.0.exon.1;Parent=Potri.014G070200.1.v3.0;pacid=27035512)	Potri.014G070200	2285	36	0.5	72		AT3G22142.1	Bifunctional inhibitor/lipid-transfer protein/seed storage 2S albumin superfamily protein
Chr16	13468782	13468838	Chr16-118	152.8	0.656	+	promoter-TSS (ID=Potri.016G131500.1.v3.0.exon.3;Parent=Potri.016G131500.1.v3.0;pacid=27013534)	Potri.016G131500	-161	36	0.5	72		AT3G19895.1	RING/U-box superfamily protein
Chr10	2010127	2010183	Chr10-260	152.8	0.697	+	Intergenic	Potri.010G015900	6088	36	0.5	72		AT5G28850.2	Calcium-binding EF-hand family protein
Chr04	16336114	16336170	Chr04-11	16324.9	0.685	+	Intergenic	Potri.004G140200	6414	3959.5	55	71.9909	GO:0031072	AT1G75310.1	auxin-like 1 protein
Chr16	829675	829731	Chr16-20	3861.6	0.702	+	promoter-TSS (ID=Potri.016G015200.2.v3.0.exon.2;Parent=Potri.016G015200.2.v3.0;pacid=27012291)	Potri.016G015200	-176	1186.5	16.5	71.9091		AT3G54970.1	D-aminoacid aminotransferase-like PLP-dependent enzymes superfamily protein
Chr12	4645704	4645760	Chr12-21	946.3	0.704	+	Intergenic	Potri.012G049200	-12724	215.5	3	71.8333		AT3G02645.1	Plant protein of unknown function (DUF247)
Chr01	28112082	28112138	Chr01-37	908.1	0.619	+	TTS (ID=Potri.001G274600.1.v3.0.exon.2;Parent=Potri.001G274600.1.v3.0;pacid=27043410)	Potri.001G274600	789	215.5	3	71.8333		AT5G45275.1	Major facilitator superfamily protein
Chr15	4779360	4779416	Chr15-49	477.4	0.646	+	TTS (ID=Potri.015G047100.1.v3.0.exon.3;Parent=Potri.015G047100.1.v3.0;pacid=27018708)	Potri.015G047100	1232	107.5	1.5	71.6667		AT5G08340.2	Nucleotidylyl transferase superfamily protein
Chr09	7667440	7667496	Chr09-39	475.3	0.669	+	promoter-TSS (ID=Potri.009G080200.1.v3.0.exon.1;Parent=Potri.009G080200.1.v3.0;pacid=26988084)	Potri.009G080200	-74	107.5	1.5	71.6667		AT5G17210.1	Protein of unknown function (DUF1218)
Chr01	50269232	50269288	Chr01-95	471	0.707	+	Intergenic	Potri.001G471200	4929	107.5	1.5	71.6667	GO:0003676,GO:0003723,GO:0006396	AT5G25060.1	RNA recognition motif (RRM)-containing protein
Chr09	5582414	5582470	Chr09-9	2393.4	0.63	+	promoter-TSS (ID=Potri.009G051200.1.v3.0.exon.1;Parent=Potri.009G051200.1.v3.0;pacid=26986360)	Potri.009G051200	-191	572.5	8	71.5625	GO:0005515	AT4G22910.1	FIZZY-related 2
Chr04	1087706	1087762	Chr04-89	324.6	0.604	+	Intergenic	Potri.004G016000	-3014	71.5	1	71.5		AT3G14460.1	LRR and NB-ARC domains-containing disease resistance protein
Chr05	3244116	3244172	Chr05-126	320.4	0.639	+	Intergenic	Potri.005G044000	-1412	71.5	1	71.5
Chr03	11913715	11913771	Chr03-38	5431.7	0.683	+	Intergenic	Potri.003G091900	-3203	1285.5	18	71.4167	GO:0030528,GO:0006355	AT3G28857.1	basic helix-loop-helix (bHLH) DNA-binding family protein
Chr08	13169407	13169463	Chr08-12	1205.2	0.702	+	Intergenic	Potri.008G189900	2524	285	4	71.25	GO:0003676	AT4G36690.1	U2 snRNP auxilliary factor, large subunit, splicing factor
Chr02	13841898	13841954	Chr02-39	619.6	0.777	+	Intergenic	Potri.002G178700	-3760	142.5	2	71.25	GO:0003677	AT3G13890.2	myb domain protein 26
Chr13	12720788	12720844	Chr13-34	772.3	0.69	+	promoter-TSS (ID=Potri.013G114100.2.v3.0.exon.8;Parent=Potri.013G114100.2.v3.0;pacid=26993552)	Potri.013G114100	-120	178	2.5	71.2		AT3G59670.1
Chr08	15961319	15961375	Chr08-83	307.7	0.585	+	TTS (ID=Potri.008G209200.1.v3.0.exon.1;Parent=Potri.008G209200.1.v3.0;pacid=27036685)	Potri.008G209200	277	71	1	71	GO:0003700,GO:0006355	AT5G11590.1	Integrase-type DNA-binding superfamily protein
Chr16	5118010	5118066	Chr16-59	303.4	0.695	+	promoter-TSS (ID=Potri.016G070000.1.v3.0.exon.5;Parent=Potri.016G070000.1.v3.0;pacid=27012751)	Potri.016G070000	-69	71	1	71		AT1G38131.1	O-fucosyltransferase family protein
Chr10	16412177	16412233	Chr10-101	294.9	0.704	+	Intergenic	Potri.010G157300	1669	71	1	71
Chr17	5118270	5118326	Chr17-122	165.5	0.73	+	Intergenic	Potri.017G056800	-2137	35.5	0.5	71		AT3G03990.1	alpha/beta-Hydrolases superfamily protein
Chr07	2207629	2207685	Chr07-155	163.4	0.69	+	promoter-TSS (ID=Potri.007G029400.1.v3.0.exon.3;Parent=Potri.007G029400.1.v3.0;pacid=27016359)	Potri.007G029400	-804	35.5	0.5	71		AT5G46020.1
Chr02	3157336	3157392	Chr02-259	161.3	0.658	+	promoter-TSS (ID=Potri.002G048300.2.v3.0.exon.2;Parent=Potri.002G048300.2.v3.0;pacid=27023109)	Potri.002G048300	-76	35.5	0.5	71	GO:0017089,GO:0051861,GO:0046836,GO:0005737	AT2G33470.1	glycolipid transfer protein 1
Chr16	13213574	13213630	Chr16-115	161.3	0.694	+	Intergenic	Potri.016G129500	-2855	35.5	0.5	71		AT1G67930.1	Golgi transport complex protein-related
Chr18	13033252	13033308	Chr18-142	159.1	0.655	+	Intergenic	Potri.018G102900	-3369	35.5	0.5	71		AT5G22900.1	cation/H+ exchanger 3
Chr08	1530645	1530701	Chr08-168	159.1	0.588	+	Intergenic	Potri.008G028400	-2031	35.5	0.5	71	GO:0016021	AT1G32400.1	tobamovirus multiplication 2A
Chr10	19775431	19775487	Chr10-227	159.1	0.69	+	promoter-TSS (ID=Potri.010G207900.1.v3.0.exon.1;Parent=Potri.010G207900.1.v3.0;pacid=26981635)	Potri.010G207900	-399	35.5	0.5	71		AT5G24030.1	SLAC1 homologue 3
Chr14	3180262	3180318	Chr14-144	157	0.673	+	Intergenic	Potri.014G038800	-2901	35.5	0.5	71	GO:0005215,GO:0006810,GO:0055085,GO:0016021	AT5G13550.1	sulfate transporter 4.1
Chr09	2166184	2166240	Chr09-212	154.9	0.793	+	TTS (ID=Potri.009G012800.1.v3.0.exon.2;Parent=Potri.009G012800.1.v3.0;pacid=26988062)	Potri.009G012800	1067	35.5	0.5	71	GO:0003700,GO:0043565,GO:0006355,GO:0003677,GO:0005634	AT4G40060.1	homeobox protein 16
Chr09	1824470	1824526	Chr09-204	152.8	0.621	+	Intergenic	Potri.009G010000	2412	35.5	0.5	71	GO:0009058	AT5G20280.1	sucrose phosphate synthase 1F
Chr19	2214843	2214899	Chr19-135	150.6	0.688	+	Intergenic	Potri.019G018800	-4271	35.5	0.5	71	GO:0006887,GO:0000145	AT5G52340.1	exocyst subunit exo70 family protein A2
Chr16	8071622	8071678	Chr16-7	1826.8	0.597	+	Intergenic	Potri.016G093700	-24680	425.5	6	70.9167	GO:0005515,GO:0003676,GO:0008270	AT5G12850.1	CCCH-type zinc finger protein with ARM repeat domain
Chr07	13982652	13982708	Chr07-10	2703.1	0.648	+	promoter-TSS (ID=Potri.007G120900.1.v3.0.exon.4;Parent=Potri.007G120900.1.v3.0;pacid=27016963)	Potri.007G120900	89	602.5	8.5	70.8824		AT2G26970.1	Polynucleotidyl transferase, ribonuclease H-like superfamily protein
Chr02	24234714	24234770	Chr02-6	2885.6	0.765	+	Intergenic	Potri.002G253200	-6525	672.5	9.5	70.7895	GO:0005509,GO:0007165,GO:0005578	AT3G22930.1	calmodulin-like 11
Chr02	23378864	23378920	Chr02-81	967.5	0.729	+	TTS (ID=Potri.002G241300.1.v3.0.exon.1;Parent=Potri.002G241300.1.v3.0;pacid=27022352)	Potri.002G241300	772	212	3	70.6667	GO:0005524	AT4G36280.1	Histidine kinase-, DNA gyrase B-, and HSP90-like ATPase family protein
Chr09	2536276	2536332	Chr09-40	483.8	0.635	+	promoter-TSS (ID=Potri.009G014800.1.v3.0.exon.1;Parent=Potri.009G014800.1.v3.0;pacid=26988589)	Potri.009G014800	-356	106	1.5	70.6667		AT3G21610.1	Acid phosphatase/vanadium-dependent haloperoxidase-related protein
Chr02	8180871	8180927	Chr02-17	1712.3	0.64	+	TTS (ID=Potri.002G110700.1.v3.0.exon.5;Parent=Potri.002G110700.1.v3.0;pacid=27021370)	Potri.002G110700	432	388.5	5.5	70.6364		AT2G30400.1	ovate family protein 2
Chr14	10320312	10320368	Chr14-9	1217.9	0.646	+	promoter-TSS (ID=Potri.014G135500.1.v3.0.exon.3;Parent=Potri.014G135500.1.v3.0;pacid=27033773)	Potri.014G135500	-542	282.5	4	70.625		AT5G02420.1
Chr08	14948514	14948570	Chr08-94	322.5	0.714	+	Intergenic	Potri.008G205700	-26531	70.5	1	70.5	GO:0022857,GO:0055085,GO:0016021	AT4G35300.1	tonoplast monosaccharide transporter2
Chr14	10908519	10908575	Chr14-75	299.2	0.703	+	Intergenic	Potri.014G142900	1471	70.5	1	70.5		AT5G61220.1	LYR family of Fe/S cluster biogenesis protein
Chr07	3921289	3921345	Chr07-1	25019.9	0.86	+	Intergenic	Potri.007G044600	-3025	5775.5	82	70.4329	GO:0004857,GO:0030599	AT1G14890.1	Plant invertase/pectin methylesterase inhibitor superfamily protein
Chr01	14554996	14555052	Chr01-76	1324	0.644	+	promoter-TSS (ID=Potri.001G171800.1.v3.0.exon.3;Parent=Potri.001G171800.1.v3.0;pacid=27048686)	Potri.001G171800	-17	316	4.5	70.2222		AT4G13440.1	Calcium-binding EF-hand family protein
Chr15	4769866	4769922	Chr15-64	460.4	0.669	+	Intergenic	Potri.015G047100	-7341	105	1.5	70	GO:0004672,GO:0005524,GO:0006468	AT1G54510.1	NIMA-related serine/threonine kinase 1
Chr13	13373879	13373935	Chr13-67	314	0.64	+	promoter-TSS (ID=Potri.013G120300.7.v3.0.exon.2;Parent=Potri.013G120300.7.v3.0;pacid=26994035)	Potri.013G120300	-573	70	1	70	GO:0005515	AT2G22170.1	Lipase/lipooxygenase, PLAT/LH2 family protein
Chr13	687083	687139	Chr13-89	303.4	0.742	+	promoter-TSS (ID=Potri.013G010900.2.v3.0.exon.3;Parent=Potri.013G010900.2.v3.0;pacid=26994554)	Potri.013G010900	-398	70	1	70	GO:0016020	AT5G47470.1	Nodulin MtN21 /EamA-like transporter family protein
Chr09	12712896	12712952	Chr09-82	286.4	0.645	+	Intergenic	Potri.009G166900	-3451	70	1	70		AT5G42660.1	Protein of unknown function (DUF616)
Chr03	7249566	7249622	Chr03-226	174	0.655	+	promoter-TSS (ID=Potri.003G049300.1.v3.0.exon.17;Parent=Potri.003G049300.1.v3.0;pacid=26999606)	Potri.003G049300	-33	35	0.5	70	GO:0005515,GO:0005634	AT5G46910.1	Transcription factor jumonji (jmj) family protein / zinc finger (C5HC2 type) family protein
Chr03	20453975	20454031	Chr03-241	167.6	0.703	+	promoter-TSS (ID=Potri.003G203300.1.v3.0.exon.2;Parent=Potri.003G203300.1.v3.0;pacid=26998756)	Potri.003G203300	-80	35	0.5	70	GO:0008146	AT1G18590.1	sulfotransferase 17
Chr05	16640741	16640797	Chr05-269	161.3	0.718	+	Intergenic	Potri.005G162400	-8250	35	0.5	70		AT5G49210.1
Chr01	38181968	38182024	Chr01-521	159.1	0.723	+	promoter-TSS (ID=Potri.001G368500.1.v3.0.exon.14;Parent=Potri.001G368500.1.v3.0;pacid=27044242)	Potri.001G368500	-513	35	0.5	70		AT2G20320.1	DENN (AEX-3) domain-containing protein
Chr06	11355937	11355993	Chr06-278	157	0.727	+	Intergenic	Potri.006G137100	6790	35	0.5	70	GO:0003700,GO:0008270,GO:0043565,GO:0006355	AT3G60530.1	GATA transcription factor 4
scaffold_1090	16238	16294	scaffold_1090-1	157	0.713	+	Intergenic	Potri.T171100	1989	35	0.5	70	GO:0005515	AT5G42010.1	Transducin/WD40 repeat-like superfamily protein
Chr16	11505283	11505339	Chr16-128	154.9	0.669	+	Intergenic	Potri.016G112300	-3119	35	0.5	70
Chr10	7273454	7273510	Chr10-236	154.9	0.597	+	Intergenic	Potri.010G042200	-8802	35	0.5	70		AT2G39630.1	Nucleotide-diphospho-sugar transferases superfamily protein
Chr07	10034632	10034688	Chr07-161	152.8	0.66	+	promoter-TSS (ID=Potri.007G076500.6.v3.0.exon.1;Parent=Potri.007G076500.6.v3.0;pacid=27014861)	Potri.007G076500	-268	35	0.5	70		AT5G55730.1	FASCICLIN-like arabinogalactan 1
Chr11	11353456	11353512	Chr11-176	152.8	0.722	+	Intergenic	Potri.011G093500	-10825	35	0.5	70		AT1G50020.1
Chr02	12790295	12790351	Chr02-289	150.6	0.691	+	TTS (ID=Potri.002G168800.1.v3.0.exon.2;Parent=Potri.002G168800.1.v3.0;pacid=27023262)	Potri.002G168800	957	35	0.5	70		AT4G16530.1	Family of unknown function (DUF577)
Chr02	15488996	15489052	Chr02-313	148.5	0.686	+	Intergenic	Potri.002G193700	-1816	35	0.5	70	GO:0008168,GO:0008152	AT1G77260.1	S-adenosyl-L-methionine-dependent methyltransferases superfamily protein
Chr07	14680685	14680741	Chr07-165	148.5	0.722	+	promoter-TSS (ID=Potri.007G132900.3.v3.0.exon.1;Parent=Potri.007G132900.3.v3.0;pacid=27015931)	Potri.007G132900	-10	35	0.5	70		AT2G26970.1	Polynucleotidyl transferase, ribonuclease H-like superfamily protein
scaffold_53	7175	7231	scaffold_53-4	144.3	0.864	+	Intergenic	Potri.T057300	-2991	35	0.5	70	GO:0005515	AT5G16210.1	HEAT repeat-containing protein
scaffold_3312	499	555	scaffold_3312-1	937.8	0.681	+				209.5	3	69.8333	GO:0000156,GO:0000160,GO:0006355,GO:0003677	AT1G67710.1	response regulator 11
Chr01	44598283	44598339	Chr01-155	477.4	0.655	+	Intergenic	Potri.001G420800	-3429	104.5	1.5	69.6667		AT5G13800.1	pheophytinase
Chr12	14696942	14696998	Chr12-72	460.4	0.85	+	promoter-TSS (ID=Potri.012G130000.1.v3.0.exon.1;Parent=Potri.012G130000.1.v3.0;pacid=27050940)	Potri.012G130100	753	104.5	1.5	69.6667		AT5G56360.1	calmodulin-binding protein
Chr10	7710486	7710542	Chr10-19	18595.2	0.698	+	Intergenic	Potri.010G046300	-20489	4205	60.5	69.5041	GO:0019904	AT2G42590.2	general regulatory factor 9
Chr06	5447720	5447776	Chr06-11	1474.6	0.813	+	Intergenic	Potri.006G073000	-6153	347.5	5	69.5	GO:0003677,GO:0006355	AT5G53950.1	NAC (No Apical Meristem) domain transcriptional regulator superfamily protein
Chr13	9543768	9543824	Chr13-76	309.8	0.7	+	TTS (ID=Potri.013G090300.1.v3.0.exon.3;Parent=Potri.013G090300.1.v3.0;pacid=26995883)	Potri.013G090300	1128	69.5	1	69.5		AT5G64170.2	dentin sialophosphoprotein-related
Chr06	23035760	23035816	Chr06-131	305.5	0.623	+	promoter-TSS (ID=Potri.006G217900.2.v3.0.exon.3;Parent=Potri.006G217900.2.v3.0;pacid=27007433)	Potri.006G217900	63	69.5	1	69.5	GO:0015299,GO:0006812,GO:0055085,GO:0016021	AT3G05030.1	sodium hydrogen exchanger 2
Chr14	5574844	5574900	Chr14-58	305.5	0.695	+	Intergenic	Potri.014G068600	-2578	69.5	1	69.5		AT1G75800.1	Pathogenesis-related thaumatin superfamily protein
Chr01	13038154	13038210	Chr01-91	462.5	0.74	+	Intergenic	Potri.001G157200	-2242	104	1.5	69.3333
Chr11	15971482	15971538	Chr11-50	451.9	0.666	+	promoter-TSS (ID=Potri.011G135800.1.v3.0.exon.3;Parent=Potri.011G135800.1.v3.0;pacid=27001551)	Potri.011G135800	-68	104	1.5	69.3333		AT1G32190.1	alpha/beta-Hydrolases superfamily protein
Chr16	13072177	13072233	Chr16-32	441.3	0.739	+	TTS (ID=Potri.016G128000.1.v3.0.exon.1;Parent=Potri.016G128000.1.v3.0;pacid=27011943)	Potri.016G127900	-1067	104	1.5	69.3333	GO:0016740,GO:0030170,GO:0009058,GO:0016769	AT1G72330.1	alanine aminotransferase 2
Chr06	4060042	4060098	Chr06-306	159.1	0.712	+	promoter-TSS (ID=Potri.006G055400.1.v3.0.exon.6;Parent=Potri.006G055400.1.v3.0;pacid=27003844)	Potri.006G055400	90	34.5	0.5	69	GO:0003824,GO:0005515	AT5G19280.1	kinase associated protein phosphatase
Chr01	8513754	8513810	Chr01-499	154.9	0.629	+	promoter-TSS (ID=Potri.001G107000.2.v3.0.exon.1;Parent=Potri.001G107000.2.v3.0;pacid=27040592)	Potri.001G107000	-717	34.5	0.5	69	GO:0008762,GO:0016491,GO:0050660,GO:0055114	AT1G30760.1	FAD-binding Berberine family protein
Chr05	20361599	20361655	Chr05-321	152.8	0.626	+	Intergenic	Potri.005G186200	2409	34.5	0.5	69		AT5G28730.1
Chr10	12670516	12670572	Chr10-238	150.6	0.705	+	promoter-TSS (ID=Potri.010G106800.2.v3.0.exon.1;Parent=Potri.010G106800.2.v3.0;pacid=26980059)	Potri.010G106800	-165	34.5	0.5	69	GO:0055085	AT3G11320.1	Nucleotide-sugar transporter family protein
Chr06	17183385	17183441	Chr06-295	150.6	0.66	+	Intergenic	Potri.006G167200	-3190	34.5	0.5	69	GO:0003854,GO:0016616,GO:0006694,GO:0055114,GO:0003824,GO:0050662,GO:0044237	AT2G45400.1	NAD(P)-binding Rossmann-fold superfamily protein
Chr11	2108760	2108816	Chr11-201	148.5	0.672	+	promoter-TSS (ID=Potri.011G025400.1.v3.0.exon.1;Parent=Potri.011G025400.1.v3.0;pacid=27002899)	Potri.011G025400	-533	34.5	0.5	69		AT1G48120.1	hydrolases;protein serine/threonine phosphatases
Chr08	5537253	5537309	Chr08-193	144.3	0.702	+	Intergenic	Potri.008G088300	2092	34.5	0.5	69	GO:0008270,GO:0003677	AT1G51200.1	A20/AN1-like zinc finger family protein
Chr19	3102069	3102125	Chr19-102	142.2	0.783	+	Intergenic	Potri.019G027000	1682	34.5	0.5	69		AT5G17020.1	exportin 1A
Chr18	3156296	3156352	Chr18-19	13010.7	0.727	+	promoter-TSS (ID=Potri.018G038000.1.v3.0.exon.8;Parent=Potri.018G038000.1.v3.0;pacid=27009125)	Potri.018G038000	-638	3518	51	68.9804		AT5G05830.1	RING/FYVE/PHD zinc finger superfamily protein
Chr09	4875505	4875561	Chr09-15	2427.3	0.67	+	promoter-TSS (ID=Potri.009G041800.4.v3.0.exon.12;Parent=Potri.009G041800.4.v3.0;pacid=26987845)	Potri.009G041800	100	551.5	8	68.9375	GO:0035556,GO:0016020	AT1G12390.1	Cornichon family protein
Chr11	5569937	5569993	Chr11-19	2662.8	0.684	+	Intergenic	Potri.011G062400	-9409	619.5	9	68.8333		AT4G29100.1	basic helix-loop-helix (bHLH) DNA-binding superfamily protein
Chr03	20448496	20448552	Chr03-82	464.7	0.663	+	exon (ID=Potri.003G203100.1.v3.0.exon.1;Parent=Potri.003G203100.1.v3.0;pacid=26996945, exon 1 of 1)	Potri.003G203100	898	103	1.5	68.6667		AT2G34680.1	Outer arm dynein light chain 1 protein
Chr06	7465297	7465353	Chr06-77	437.1	0.85	+	Intergenic	Potri.006G097500	-5011	103	1.5	68.6667	GO:0051082,GO:0006457	AT2G20560.1	DNAJ heat shock family protein
Chr16	10228816	10228872	Chr16-31	611.1	0.591	+	Intergenic	Potri.016G103300	-8386	137	2	68.5		AT5G62580.1	ARM repeat superfamily protein
Chr04	7612105	7612161	Chr04-97	305.5	0.678	+	Intergenic	Potri.004G089600	-6315	68.5	1	68.5	GO:0003677,GO:0004803,GO:0006313,GO:0008270	AT4G15090.1	FRS (FAR1 Related Sequences) transcription factor family
Chr05	4517735	4517791	Chr05-21	3384.2	0.699	+	Intergenic	Potri.005G062900	2837	787.5	11.5	68.4783	GO:0005515	AT5G22660.2	FBD, F-box, Skp2-like and Leucine Rich Repeat domains containing protein
Chr06	21163972	21164028	Chr06-54	1576.5	0.701	+	promoter-TSS (ID=Potri.006G195600.1.v3.0.exon.5;Parent=Potri.006G195600.1.v3.0;pacid=27003917)	Potri.006G195600	-457	375.5	5.5	68.2727	GO:0003700,GO:0043565,GO:0046983,GO:0006355	AT5G11260.1	Basic-leucine zipper (bZIP) transcription factor family protein
Chr06	3474305	3474361	Chr06-8	1502.2	0.782	+	Intergenic	Potri.006G048500	-2266	340.5	5	68.1	GO:0005524,GO:0030983,GO:0006298,GO:0006281,GO:0005622,GO:0004518	AT3G24320.1	MUTL protein homolog 1
Chr05	1666508	1666564	Chr05-24	1067.2	0.667	+	promoter-TSS (ID=Potri.005G021600.1.v3.0.exon.7;Parent=Potri.005G021600.1.v3.0;pacid=27031533)	Potri.005G021600	29	238	3.5	68		AT2G18910.1	hydroxyproline-rich glycoprotein family protein
Chr14	2475865	2475921	Chr14-34	454.1	0.668	+	promoter-TSS (ID=Potri.014G029100.2.v3.0.exon.2;Parent=Potri.014G029100.2.v3.0;pacid=27032147)	Potri.014G029100	-28	102	1.5	68	GO:0003723	AT2G20020.1	RNA-binding CRS1 / YhbY (CRM) domain-containing protein
Chr10	7770568	7770624	Chr10-91	447.7	0.717	+	Intergenic	Potri.010G046600	18559	102	1.5	68	GO:0000166,GO:0046872,GO:0003824,GO:0008152	AT1G59820.1	aminophospholipid ATPase 3
Chr17	2161311	2161367	Chr17-46	335.2	0.64	+	Intergenic	Potri.017G024000	23190	68	1	68	GO:0004372,GO:0006544,GO:0006563	AT4G13930.1	serine hydroxymethyltransferase 4
Chr02	11128948	11129004	Chr02-138	290.7	0.678	+	TTS (ID=Potri.002G149500.1.v3.0.exon.3;Parent=Potri.002G149500.1.v3.0;pacid=27022110)	Potri.002G149500	1741	68	1	68	GO:0005515	AT3G21060.1	Transducin/WD40 repeat-like superfamily protein
Chr01	33334763	33334819	Chr01-459	165.5	0.664	+	promoter-TSS (ID=Potri.001G329500.4.v3.0.exon.1;Parent=Potri.001G329500.4.v3.0;pacid=27046458)	Potri.001G329500	-135	34	0.5	68		AT5G53620.1
Chr18	8276970	8277026	Chr18-151	154.9	0.579	+	promoter-TSS (ID=Potri.018G065400.1.v3.0.exon.2;Parent=Potri.018G065400.1.v3.0;pacid=27009514)	Potri.018G065400	-180	34	0.5	68
Chr01	31878763	31878819	Chr01-449	150.6	0.579	+	promoter-TSS (ID=Potri.001G312900.3.v3.0.exon.1;Parent=Potri.001G312900.3.v3.0;pacid=27041703)	Potri.001G312900	-26	34	0.5	68	GO:0005515	AT4G18760.1	receptor like protein 51
Chr13	9061652	9061708	Chr13-150	150.6	0.737	+	Intergenic	Potri.013G088300	-2760	34	0.5	68		AT2G26580.1	plant-specific transcription factor YABBY family protein
Chr19	11288368	11288424	Chr19-137	148.5	0.756	+	promoter-TSS (ID=Potri.019G079200.1.v3.0.exon.1;Parent=Potri.019G079200.1.v3.0;pacid=27025394)	Potri.019G079200	-498	34	0.5	68		AT1G10500.1	chloroplast-localized ISCA-like protein
Chr17	15577615	15577671	Chr17-136	144.3	0.675	+	Intergenic	Potri.017G150000	3114	34	0.5	68	GO:0016021	AT4G12650.1	Endomembrane protein 70 protein family
Chr08	14444329	14444385	Chr08-52	982.4	0.659	+	promoter-TSS (ID=Potri.008G202700.2.v3.0.exon.3;Parent=Potri.008G202700.2.v3.0;pacid=27036477)	Potri.008G202700	-437	237.5	3.5	67.8571		AT5G11420.1	Protein of unknown function, DUF642
Chr10	14890630	14890686	Chr10-20	899.6	0.64	+	promoter-TSS (ID=Potri.010G134700.1.v3.0.exon.1;Parent=Potri.010G134700.1.v3.0;pacid=26978615)	Potri.010G134700	-92	203.5	3	67.8333	GO:0016597,GO:0008152	AT5G04740.1	ACT domain-containing protein
Chr05	17457914	17457970	Chr05-53	2323.3	0.661	+	Intergenic	Potri.005G166800	-56160	507.5	7.5	67.6667	GO:0004177,GO:0006508	AT4G14290.1	alpha/beta-Hydrolases superfamily protein
Chr01	16459469	16459525	Chr01-44	1884.1	0.661	+	Intergenic	Potri.001G186800	-1682	439.5	6.5	67.6154		AT2G17510.2	ribonuclease II family protein
Chr03	13123134	13123190	Chr03-68	583.5	0.672	+	promoter-TSS (ID=Potri.003G107400.3.v3.0.exon.2;Parent=Potri.003G107400.3.v3.0;pacid=26997478)	Potri.003G107400	-950	135	2	67.5		AT2G02880.1	mucin-related
Chr08	6818382	6818438	Chr08-42	999.4	0.668	+	promoter-TSS (ID=Potri.008G107400.1.v3.0.exon.1;Parent=Potri.008G107400.1.v3.0;pacid=27039548)	Potri.008G107400	-722	236	3.5	67.4286	GO:0005515	AT1G07390.3	receptor like protein 1
Chr16	6308801	6308857	Chr16-3	1326.1	0.619	+	promoter-TSS (ID=Potri.016G081300.1.v3.0.exon.1;Parent=Potri.016G081300.1.v3.0;pacid=27013429)	Potri.016G081300	27	303	4.5	67.3333	GO:0005515	AT3G03680.1	C2 calcium/lipid-binding plant phosphoribosyltransferase family protein
Chr10	18318318	18318374	Chr10-31	2718	0.676	+	Intergenic	Potri.010G186900	-1525	739	11	67.1818	GO:0005506,GO:0009055,GO:0016705,GO:0020037,GO:0055114	AT3G30180.1	brassinosteroid-6-oxidase 2
scaffold_135	93348	93404	scaffold_135-1	2620.4	0.89	+	Intergenic	Potri.T097200	10122	636.5	9.5	67		AT1G77600.2	ARM repeat superfamily protein
Chr11	7106293	7106349	Chr11-24	852.9	0.655	+	Intergenic	Potri.011G073300	4233	201	3	67	GO:0003677,GO:0046983,GO:0043565,GO:0006355,GO:0005634,GO:0003700	AT5G48670.1	AGAMOUS-like 80
Chr08	14665532	14665588	Chr08-67	445.6	0.722	+	Intergenic	Potri.008G203800	9257	100.5	1.5	67	GO:0005515	AT4G30200.3	vernalization5/VIN3-like
Chr06	19980412	19980468	Chr06-274	165.5	0.643	+	Intergenic	Potri.006G185700	-2510	33.5	0.5	67		AT1G02610.1	RING/FYVE/PHD zinc finger superfamily protein
Chr06	11592443	11592499	Chr06-316	159.1	0.763	+	Intergenic	Potri.006G138700	-2570	33.5	0.5	67		AT5G55730.1	FASCICLIN-like arabinogalactan 1
scaffold_23	389103	389159	scaffold_23-3	150.6	0.806	+	Intergenic	Potri.T007100	26364	33.5	0.5	67	GO:0005515	AT2G01680.1	Ankyrin repeat family protein
Chr01	7619876	7619932	Chr01-526	146.4	0.727	+	promoter-TSS (ID=Potri.001G096800.1.v3.0.exon.1;Parent=Potri.001G096800.1.v3.0;pacid=27041818)	Potri.001G096800	-428	33.5	0.5	67
Chr02	10914971	10915027	Chr02-307	146.4	0.692	+	Intergenic	Potri.002G146700	-1796	33.5	0.5	67	#N/A	#N/A	#N/A
Chr02	9310717	9310773	Chr02-288	144.3	0.747	+	promoter-TSS (ID=Potri.002G124100.1.v3.0.exon.3;Parent=Potri.002G124100.1.v3.0;pacid=27024395)	Potri.002G124100	-18	33.5	0.5	67	GO:0003677	AT1G17950.1	myb domain protein 52
Chr16	5380908	5380964	Chr16-116	144.3	0.716	+	promoter-TSS (ID=Potri.016G072000.1.v3.0.exon.1;Parent=Potri.016G072000.1.v3.0;pacid=27013582)	Potri.016G072000	-16	33.5	0.5	67		AT4G30390.1
Chr05	12345769	12345825	Chr05-312	144.3	0.766	+	Intergenic	Potri.005G144400	-1242	33.5	0.5	67	GO:0016787,GO:0006541,GO:0008242,GO:0003824	AT1G78680.1	gamma-glutamyl hydrolase 2
Chr08	8295608	8295664	Chr08-235	142.2	0.77	+	Intergenic	Potri.008G127300	-2100	33.5	0.5	67	GO:0003677	AT3G54560.1	histone H2A 11
Chr04	9128483	9128539	Chr04-387	142.2	0.904	+	promoter-TSS (ID=Potri.004G104000.1.v3.0.exon.8;Parent=Potri.004G104000.1.v3.0;pacid=26990288)	Potri.004G104000	-87	33.5	0.5	67		AT1G35710.1	Protein kinase family protein with leucine-rich repeat domain
Chr01	35000927	35000983	Chr01-678	140	0.81	+	Intergenic	Potri.001G344600	-1257	33.5	0.5	67
Chr09	10794288	10794344	Chr09-32	664.1	0.596	+	Intergenic	Potri.009G133400	-1355	167	2.5	66.8	GO:0005525,GO:0007264,GO:0005622	AT4G35020.1	RAC-like 3
Chr13	5612735	5612791	Chr13-8	1167	0.824	+	Intergenic	Potri.013G069300	-3789	266	4	66.5	GO:0003677	AT3G08500.1	myb domain protein 83
Chr04	23162613	23162669	Chr04-33	592	0.591	+	Intergenic	Potri.004G225700	-5812	133	2	66.5		AT4G36750.1	Quinone reductase family protein
Chr03	16069036	16069092	Chr03-52	1296.4	0.677	+	promoter-TSS (ID=Potri.003G144400.3.v3.0.exon.3;Parent=Potri.003G144400.3.v3.0;pacid=26996866)	Potri.003G144400	148	299	4.5	66.4444	GO:0016881,GO:0005515	AT5G41700.1	ubiquitin conjugating enzyme 8
Chr07	4509559	4509615	Chr07-36	445.6	0.79	+	Intergenic	Potri.007G048400	-8261	99.5	1.5	66.3333	GO:0055085,GO:0016021	AT4G22990.2	Major Facilitator Superfamily with SPX (SYG1/Pho81/XPR1) domain-containing protein
Chr05	23151866	23151922	Chr05-27	5049.8	0.689	+	promoter-TSS (ID=Potri.005G219500.1.v3.0.exon.3;Parent=Potri.005G219500.1.v3.0;pacid=27031925)	Potri.005G219500	-82	1160.5	17.5	66.3143	GO:0003677	AT1G08810.1	myb domain protein 60
Chr12	9581444	9581500	Chr12-24	2737.1	0.626	+	Intergenic	Potri.012G071100	-7739	760.5	11.5	66.1304	GO:0006886,GO:0016192,GO:0005198,GO:0030130,GO:0030132	AT3G11130.1	Clathrin, heavy chain
Chr09	9067433	9067489	Chr09-12	20634.2	0.684	+	promoter-TSS (ID=Potri.009G103000.4.v3.0.exon.12;Parent=Potri.009G103000.4.v3.0;pacid=26985810)	Potri.009G103000	-1	5387	81.5	66.0982
scaffold_291	10739	10795	scaffold_291-1	12860	0.665	+	promoter-TSS (ID=Potri.T136400.1.v3.0.exon.1;Parent=Potri.T136400.1.v3.0;pacid=27027033)	Potri.T136400	72	2941	44.5	66.0899	GO:0031625,GO:0006511,GO:0031461	AT5G46210.1	cullin4
Chr05	177893	177949	Chr05-61	1705.9	0.696	+	TTS (ID=Potri.005G003100.1.v3.0.exon.2;Parent=Potri.005G003100.1.v3.0;pacid=27028920)	Potri.005G003200	-2371	396.5	6	66.0833	GO:0005524,GO:0005515,GO:0016887	AT1G05910.1	cell division cycle protein 48-related / CDC48-related
Chr06	4804943	4804999	Chr06-32	700.2	0.725	+	promoter-TSS (ID=Potri.006G065300.2.v3.0.exon.1;Parent=Potri.006G065300.2.v3.0;pacid=27006840)	Potri.006G065300	-135	165	2.5	66	GO:0003723,GO:0004809,GO:0008033,GO:0016740	AT4G27340.1	Met-10+ like family protein
scaffold_28	190665	190721	scaffold_28-1	579.2	0.63	+	Intergenic	Potri.T020500	40376	132	2	66
Chr11	4441983	4442039	Chr11-54	449.8	0.64	+	promoter-TSS (ID=Potri.011G051800.4.v3.0.exon.1;Parent=Potri.011G051800.4.v3.0;pacid=27002411)	Potri.011G051800	-775	99	1.5	66	GO:0004018,GO:0006188	AT1G36280.1	L-Aspartase-like family protein
Chr13	7864568	7864624	Chr13-41	422.2	0.741	+	promoter-TSS (ID=Potri.013G084300.1.v3.0.exon.1;Parent=Potri.013G084300.1.v3.0;pacid=26995591)	Potri.013G084300	-170	99	1.5	66		AT2G27140.1	HSP20-like chaperones superfamily protein
Chr10	11124215	11124271	Chr10-165	292.8	0.775	+	Intergenic	Potri.010G086600	-1739	66	1	66	GO:0016787	AT2G39840.1	type one serine/threonine protein phosphatase 4
Chr05	22829289	22829345	Chr05-143	292.8	0.689	+	promoter-TSS (ID=Potri.005G215400.1.v3.0.exon.1;Parent=Potri.005G215400.1.v3.0;pacid=27027816)	Potri.005G215400	-192	66	1	66		AT2G44900.1	ARABIDILLO-1
Chr10	16157870	16157926	Chr10-121	288.6	0.699	+	promoter-TSS (ID=Potri.010G153900.3.v3.0.exon.2;Parent=Potri.010G153900.3.v3.0;pacid=26979650)	Potri.010G153900	55	66	1	66		AT5G13470.1
Chr14	10060714	10060770	Chr14-72	284.3	0.788	+	exon (ID=Potri.014G132300.2.v3.0.exon.1;Parent=Potri.014G132300.2.v3.0;pacid=27033649, exon 1 of 1)	Potri.014G132300	276	66	1	66		AT5G24490.1	30S ribosomal protein, putative
Chr16	1592631	1592687	Chr16-78	284.3	0.717	+	Intergenic	Potri.016G028200	-1662	66	1	66	GO:0006270	AT3G25100.1	cell division cycle 45
Chr05	18237386	18237442	Chr05-258	152.8	0.742	+	Intergenic	Potri.005G169300	-5142	33	0.5	66
Chr05	24406992	24407048	Chr05-362	142.2	0.774	+	Intergenic	Potri.005G236800	6237	33	0.5	66	GO:0008270,GO:0005622,GO:0005515	AT5G57660.1	CONSTANS-like 5
scaffold_23	152965	153021	scaffold_23-4	142.2	0.606	+	Intergenic	Potri.T006800	36802	33	0.5	66
Chr06	12224650	12224706	Chr06-300	142.2	0.852	+	Intergenic	Potri.006G144200	1718	33	0.5	66		AT1G70230.1	TRICHOME BIREFRINGENCE-LIKE 27
Chr02	24971927	24971983	Chr02-341	140	0.673	+	Intergenic	Potri.002G261700	-2164	33	0.5	66		AT2G45130.1	SPX domain gene 3
scaffold_21	238505	238561	scaffold_21-5	140	0.653	+	Intergenic	Potri.T005700	197070	33	0.5	66	GO:0004672,GO:0005524,GO:0006468	AT1G62400.1	Protein kinase superfamily protein
Chr08	15116570	15116626	Chr08-31	4731.5	0.673	+	Intergenic	Potri.008G206500	-8947	1152.5	17.5	65.8571		AT3G21680.1
Chr16	9362480	9362536	Chr16-17	708.7	0.741	+	promoter-TSS (ID=Potri.016G097100.2.v3.0.exon.3;Parent=Potri.016G097100.2.v3.0;pacid=27012992)	Potri.016G097100	-80	164.5	2.5	65.8	GO:0004672,GO:0005524,GO:0006468,GO:0016773	AT5G26751.1	shaggy-related kinase 11
Chr05	3418051	3418107	Chr05-94	581.4	0.666	+	promoter-TSS (ID=Potri.005G046700.4.v3.0.exon.7;Parent=Potri.005G046700.4.v3.0;pacid=27030736)	Potri.005G046700	-303	131.5	2	65.75		AT4G34190.1	stress enhanced protein 1
Chr15	13930699	13930755	Chr15-37	456.2	0.707	+	Intergenic	Potri.015G126900	-2617	98.5	1.5	65.6667	GO:0003824,GO:0050662,GO:0044237	AT1G75290.1	NAD(P)-binding Rossmann-fold superfamily protein
Chr04	20983831	20983887	Chr04-15	1956.3	0.653	+	promoter-TSS (ID=Potri.004G197000.3.v3.0.exon.5;Parent=Potri.004G197000.3.v3.0;pacid=26990854)	Potri.004G197000	376	459.5	7	65.6429	GO:0003700,GO:0043565,GO:0046983,GO:0006355	AT4G35900.1	Basic-leucine zipper (bZIP) transcription factor family protein
Chr05	5608553	5608609	Chr05-43	685.3	0.822	+	promoter-TSS (ID=Potri.005G076500.2.v3.0.exon.1;Parent=Potri.005G076500.2.v3.0;pacid=27028105)	Potri.005G076500	-104	164	2.5	65.6	GO:0003700,GO:0006355	AT1G72570.1	Integrase-type DNA-binding superfamily protein
Chr19	7478536	7478592	Chr19-9	687.5	0.651	+	Intergenic	Potri.019G050100	3732	163.5	2.5	65.4	GO:0004672,GO:0005524,GO:0006468,GO:0005515	AT5G25930.1	Protein kinase family protein with leucine-rich repeat domain
Chr01	11905555	11905611	Chr01-34	7033.7	0.668	+	Intergenic	Potri.001G146200	-2021	1795.5	27.5	65.2909		AT5G67170.1	SEC-C motif-containing protein / OTU-like cysteine protease family protein
Chr08	4972661	4972717	Chr08-5	1618.9	0.728	+	Intergenic	Potri.008G079700	2636	358.5	5.5	65.1818	GO:0005524	AT5G40010.1	AAA-ATPase 1
Chr06	12148244	12148300	Chr06-27	836	0.676	+	Intergenic	Potri.006G143800	-4845	195.5	3	65.1667		AT5G63440.2	Protein of unknown function (DUF167)
Chr06	19488218	19488274	Chr06-18	1010	0.668	+	promoter-TSS (ID=Potri.006G180800.1.v3.0.exon.1;Parent=Potri.006G180800.1.v3.0;pacid=27005076)	Potri.006G180800	-850	227.5	3.5	65		AT5G20110.1	Dynein light chain type 1 family protein
Chr01	2373656	2373712	Chr01-88	969.6	0.722	+	Intergenic	Potri.001G032400	-3543	227.5	3.5	65		AT5G24450.1	Transcription factor IIIC, subunit 5
Chr01	50261812	50261868	Chr01-129	464.7	0.632	+	promoter-TSS (ID=Potri.001G471200.6.v3.0.exon.1;Parent=Potri.001G471200.6.v3.0;pacid=27041399)	Potri.001G471200	-664	97.5	1.5	65		AT1G54200.1
Chr09	11992530	11992586	Chr09-55	435	0.67	+	promoter-TSS (ID=Potri.009G153300.1.v3.0.exon.5;Parent=Potri.009G153300.1.v3.0;pacid=26987886)	Potri.009G153300	77	97.5	1.5	65		AT2G37920.1	copper ion transmembrane transporters
scaffold_32	125781	125837	scaffold_32-1	286.4	0.582	+	Intergenic	Potri.T030200	1542	65	1	65	GO:0004871,GO:0009416	AT3G15570.1	Phototropic-responsive NPH3 family protein
Chr01	25257933	25257989	Chr01-402	154.9	0.839	+	Intergenic	Potri.001G241600	-1704	32.5	0.5	65	GO:0043531,GO:0006915,GO:0005524	AT4G27220.1	NB-ARC domain-containing disease resistance protein
Chr06	17081801	17081857	Chr06-348	150.6	0.685	+	Intergenic	Potri.006G166700	-7375	32.5	0.5	65	GO:0005524	AT2G39730.1	rubisco activase
Chr02	14506724	14506780	Chr02-265	148.5	0.694	+	promoter-TSS (ID=Potri.002G185500.1.v3.0.exon.1;Parent=Potri.002G185500.1.v3.0;pacid=27023763)	Potri.002G185500	-30	32.5	0.5	65	GO:0003676,GO:0005524,GO:0008026,GO:0004386	AT1G55150.1	DEA(D/H)-box RNA helicase family protein
Chr06	12910996	12911052	Chr06-317	148.5	0.651	+	Intergenic	Potri.006G148900	-10132	32.5	0.5	65		AT1G73240.1
Chr11	3589142	3589198	Chr11-171	146.4	0.705	+	Intergenic	Potri.011G042400	1865	32.5	0.5	65	GO:0003677,GO:0003887,GO:0006260	AT5G22110.1	DNA polymerase epsilon subunit B2
scaffold_2078	2061	2117	scaffold_2078-1	142.2	0.634	+				32.5	0.5	65	GO:0004672,GO:0005524,GO:0006468	AT2G41970.1	Protein kinase superfamily protein
Chr17	5677235	5677291	Chr17-150	142.2	0.714	+	Intergenic	Potri.017G061300	12423	32.5	0.5	65	GO:0004672,GO:0005524,GO:0006468	AT5G18610.1	Protein kinase superfamily protein
Chr05	19222931	19222987	Chr05-297	137.9	0.669	+	promoter-TSS (ID=Potri.005G176100.1.v3.0.exon.2;Parent=Potri.005G176100.1.v3.0;pacid=27030516)	Potri.005G176100	-38	32.5	0.5	65		AT1G31320.1	LOB domain-containing protein 4
Chr09	6273291	6273347	Chr09-161	137.9	0.629	+	Intergenic	Potri.009G060600	-1633	32.5	0.5	65	GO:0004672,GO:0005524,GO:0006468	AT5G66850.1	mitogen-activated protein kinase kinase kinase 5
Chr10	10248770	10248826	Chr10-14	1007.8	0.709	+	Intergenic	Potri.010G076600	-1842	227	3.5	64.8571		AT2G01930.1	basic pentacysteine1
Chr01	39412411	39412467	Chr01-113	698.1	0.706	+	Intergenic	Potri.001G378300	-11140	162	2.5	64.8
Chr05	239831	239887	Chr05-69	577.1	0.626	+	promoter-TSS (ID=Potri.005G003900.1.v3.0.exon.2;Parent=Potri.005G003900.1.v3.0;pacid=27030769)	Potri.005G003900	484	129.5	2	64.75	GO:0005759	AT4G32605.1	Mitochondrial glycoprotein family protein
Chr06	13118001	13118057	Chr06-10	1519.2	0.866	+	Intergenic	Potri.006G150400	2161	356	5.5	64.7273	GO:0030528,GO:0006355	AT5G67060.1	basic helix-loop-helix (bHLH) DNA-binding superfamily protein
Chr03	6092392	6092448	Chr03-27	691.7	0.757	+	promoter-TSS (ID=Potri.003G045500.4.v3.0.exon.2;Parent=Potri.003G045500.4.v3.0;pacid=26996552)	Potri.003G045500	193	161.5	2.5	64.6	GO:0005515	AT1G44910.1	pre-mRNA-processing protein 40A
Chr01	32154051	32154107	Chr01-24	1097	0.612	+	promoter-TSS (ID=Potri.001G316000.1.v3.0.exon.3;Parent=Potri.001G316000.1.v3.0;pacid=27047093)	Potri.001G316000	-18	258	4	64.5	GO:0006352,GO:0005669,GO:0016986	AT3G10070.1	TBP-associated factor 12
Chr05	8488986	8489042	Chr05-96	562.3	0.654	+	TTS (ID=Potri.005G110200.1.v3.0.exon.2;Parent=Potri.005G110200.1.v3.0;pacid=27028040)	Potri.005G110200	631	129	2	64.5	GO:0008270,GO:0006886,GO:0006888,GO:0030127	AT3G07100.1	Sec23/Sec24 protein transport family protein
Chr16	401793	401849	Chr16-55	288.6	0.746	+	Intergenic	Potri.016G008200	-2054	64.5	1	64.5	GO:0015299,GO:0006812,GO:0055085,GO:0016021	AT2G01980.1	sodium proton exchanger, putative (NHX7) (SOS1)
Chr12	4082292	4082348	Chr12-63	288.6	0.779	+	promoter-TSS (ID=Potri.012G044700.1.v3.0.exon.1;Parent=Potri.012G044700.1.v3.0;pacid=27049405)	Potri.012G044700	-175	64.5	1	64.5	GO:0005515	AT2G17150.1	Plant regulator RWP-RK family protein
Chr05	4165559	4165615	Chr05-15	1720.8	0.664	+	TTS (ID=Potri.005G059000.3.v3.0.exon.1;Parent=Potri.005G059000.3.v3.0;pacid=27028071)	Potri.005G059000	-1122	386	6	64.3333	GO:0016757	AT1G13250.1	galacturonosyltransferase-like 3
Chr04	19270416	19270472	Chr04-66	428.6	0.686	+	Intergenic	Potri.004G174200	2391	96.5	1.5	64.3333	GO:0004672,GO:0005524,GO:0006468	AT1G72710.1	casein kinase 1-like protein 2
Chr09	11988418	11988474	Chr09-53	422.2	0.726	+	promoter-TSS (ID=Potri.009G153200.1.v3.0.exon.2;Parent=Potri.009G153200.1.v3.0;pacid=26987742)	Potri.009G153200	-86	96.5	1.5	64.3333		AT3G22380.1	time for coffee
Chr01	22761263	22761319	Chr01-55	7475	0.689	+	Intergenic	Potri.001G221200	-4292	1798.5	28	64.2321	GO:0005515,GO:0004435,GO:0006629,GO:0007165,GO:0035556,GO:0004629	AT3G08510.1	phospholipase C 2
Chr12	12285347	12285403	Chr12-79	278	0.82	+	Intergenic	Potri.012G096700	4043	64	1	64	GO:0003700,GO:0043565,GO:0006355	AT5G46880.1	homeobox-7
Chr03	6173295	6173351	Chr03-252	154.9	0.676	+	Intergenic	Potri.003G045800	20965	32	0.5	64		AT3G58520.2	Ubiquitin carboxyl-terminal hydrolase family protein
Chr12	3489702	3489758	Chr12-150	144.3	0.706	+	TTS (ID=Potri.012G039400.1.v3.0.exon.3;Parent=Potri.012G039400.1.v3.0;pacid=27048849)	Potri.012G039400	625	32	0.5	64		AT1G21010.1
Chr19	13193313	13193369	Chr19-117	144.3	0.629	+	Intergenic	Potri.019G103000	-10615	32	0.5	64
Chr01	23334158	23334214	Chr01-473	142.2	0.59	+	Intergenic	Potri.001G223700	-11203	32	0.5	64	GO:0045454,GO:0016972,GO:0055114	AT2G01270.1	quiescin-sulfhydryl oxidase 2
Chr12	10463415	10463471	Chr12-174	142.2	0.777	+	promoter-TSS (ID=Potri.012G078800.1.v3.0.exon.2;Parent=Potri.012G078800.1.v3.0;pacid=27048789)	Potri.012G078800	-223	32	0.5	64	GO:0016787	AT2G39840.1	type one serine/threonine protein phosphatase 4
Chr18	9413684	9413740	Chr18-179	140	0.609	+	promoter-TSS (ID=Potri.018G072600.1.v3.0.exon.3;Parent=Potri.018G072600.1.v3.0;pacid=27009318)	Potri.018G072600	-207	32	0.5	64		AT5G05300.1
Chr02	9386426	9386482	Chr02-294	140	0.841	+	Intergenic	Potri.002G124800	-2113	32	0.5	64		AT5G20130.1
Chr07	14769415	14769471	Chr07-176	137.9	0.863	+	promoter-TSS (ID=Potri.007G134500.1.v3.0.exon.2;Parent=Potri.007G134500.1.v3.0;pacid=27015604)	Potri.007G134500	-401	32	0.5	64	GO:0016491,GO:0016706,GO:0055114	AT5G51810.1	gibberellin 20 oxidase 2
scaffold_92	20070	20126	scaffold_92-1	137.9	0.701	+	Intergenic	Potri.T080500	-3338	32	0.5	64		AT1G76730.1	NagB/RpiA/CoA transferase-like superfamily protein
Chr10	6032727	6032783	Chr10-302	137.9	0.67	+	Intergenic	Potri.010G034700	7277	32	0.5	64	GO:0003676,GO:0005524,GO:0008026,GO:0004386	AT5G11170.1	DEAD/DEAH box RNA helicase family protein
Chr17	13669344	13669400	Chr17-139	135.8	0.803	+	promoter-TSS (ID=Potri.017G124500.2.v3.0.exon.2;Parent=Potri.017G124500.2.v3.0;pacid=26984466)	Potri.017G124500	-3	32	0.5	64		AT2G44080.1	ARGOS-like
Chr08	3197548	3197604	Chr08-222	133.7	0.683	+	promoter-TSS (ID=Potri.008G054100.1.v3.0.exon.1;Parent=Potri.008G054100.1.v3.0;pacid=27038379)	Potri.008G054100	-836	32	0.5	64		AT1G18190.1	golgin candidate 2
Chr01	14758522	14758578	Chr01-539	133.7	0.64	+	promoter-TSS (ID=Potri.001G174100.1.v3.0.exon.12;Parent=Potri.001G174100.1.v3.0;pacid=27044763)	Potri.001G174100	-141	32	0.5	64		AT3G07510.1
Chr17	12286097	12286153	Chr17-124	131.5	0.69	+	TTS (ID=Potri.017G105700.1.v3.0.exon.1;Parent=Potri.017G105700.1.v3.0;pacid=26984226)	Potri.017G105700	501	32	0.5	64	GO:0008233,GO:0006508	AT1G73990.1	signal peptide peptidase
Chr01	16744064	16744120	Chr01-579	129.4	0.69	+	Intergenic	Potri.001G188900	-18612	32	0.5	64	GO:0003677	AT3G52250.1	Duplicated homeodomain-like superfamily protein
Chr02	1279896	1279952	Chr02-24	19543.6	0.674	+	Intergenic	Potri.002G021200	3329	4735	74	63.9865	GO:0005315,GO:0006817,GO:0016020	AT3G26570.2	phosphate transporter 2;1
Chr10	20625993	20626049	Chr10-73	418	0.634	+	promoter-TSS (ID=Potri.010G221300.1.v3.0.exon.1;Parent=Potri.010G221300.1.v3.0;pacid=26978393)	Potri.010G221300	-259	95.5	1.5	63.6667	GO:0015238,GO:0015297,GO:0006855,GO:0055085,GO:0016020	AT1G71870.1	MATE efflux family protein
Chr02	13186091	13186147	Chr02-10	1118.2	0.755	+	Intergenic	Potri.002G172800	4680	254	4	63.5	GO:0005515	AT2G34900.1	Transcription factor GTE6
scaffold_42	219631	219687	scaffold_42-1	838.1	0.874	+	Intergenic	Potri.T045700	-3061	190.5	3	63.5	GO:0005515	AT1G71400.1	receptor like protein 12
Chr01	42956725	42956781	Chr01-275	280.1	0.665	+	promoter-TSS (ID=Potri.001G407000.1.v3.0.exon.24;Parent=Potri.001G407000.1.v3.0;pacid=27041577)	Potri.001G407000	330	63.5	1	63.5	GO:0003677	AT5G49330.1	myb domain protein 111
Chr05	18319756	18319812	Chr05-41	666.2	0.71	+	Intergenic	Potri.005G169800	-26193	158.5	2.5	63.4	GO:0031072	AT1G71000.1	Chaperone DnaJ-domain superfamily protein
Chr04	19254084	19254140	Chr04-21	1773.8	0.659	+	promoter-TSS (ID=Potri.004G174000.1.v3.0.exon.1;Parent=Potri.004G174000.1.v3.0;pacid=26991344)	Potri.004G174000	-597	411.5	6.5	63.3077
Chr11	2882976	2883032	Chr11-66	534.7	0.663	+	Intergenic	Potri.011G034800	-4114	126	2	63	GO:0003677	AT3G52250.1	Duplicated homeodomain-like superfamily protein
Chr02	23945504	23945560	Chr02-97	437.1	0.569	+	promoter-TSS (ID=Potri.002G248700.1.v3.0.exon.1;Parent=Potri.002G248700.1.v3.0;pacid=27021690)	Potri.002G248700	22	94.5	1.5	63	GO:0016747	AT5G01210.1	HXXXD-type acyl-transferase family protein
Chr05	10389933	10389989	Chr05-131	415.9	0.663	+	Intergenic	Potri.005G129500	-1973	94.5	1.5	63	GO:0016491,GO:0008152,GO:0003854,GO:0016616,GO:0006694,GO:0055114,GO:0003824,GO:0050662,GO:0044237,GO:0009058,GO:0008831,GO:0045226,GO:0006012,GO:0003978	AT1G30620.1	NAD(P)-binding Rossmann-fold superfamily protein
Chr17	2173362	2173418	Chr17-33	409.5	0.79	+	Intergenic	Potri.017G024100	-12970	94.5	1.5	63		AT4G13440.1	Calcium-binding EF-hand family protein
Chr13	3593471	3593527	Chr13-94	290.7	0.746	+	promoter-TSS (ID=Potri.013G049300.1.v3.0.exon.4;Parent=Potri.013G049300.1.v3.0;pacid=26994788)	Potri.013G049300	-119	63	1	63	GO:0016597,GO:0008152	AT5G65890.1	ACT domain repeat 1
Chr10	10046033	10046089	Chr10-263	142.2	0.693	+	TTS (ID=Potri.010G074100.1.v3.0.exon.1;Parent=Potri.010G074100.1.v3.0;pacid=26979781)	Potri.010G074100	424	31.5	0.5	63
Chr08	5583137	5583193	Chr08-207	140	0.663	+	promoter-TSS (ID=Potri.008G089000.1.v3.0.exon.2;Parent=Potri.008G089000.1.v3.0;pacid=27037495)	Potri.008G089000	-89	31.5	0.5	63	GO:0004822	AT5G49030.3	tRNA synthetase class I (I, L, M and V) family protein
Chr05	20123933	20123989	Chr05-348	140	0.744	+	Intergenic	Potri.005G184400	-7621	31.5	0.5	63		AT4G30200.3	vernalization5/VIN3-like
Chr09	1004976	1005032	Chr09-173	140	0.683	+	promoter-TSS (ID=Potri.009G005200.1.v3.0.exon.2;Parent=Potri.009G005200.1.v3.0;pacid=26986763)	Potri.009G005200	-17	31.5	0.5	63		AT3G28917.1	mini zinc finger 2
Chr01	46256715	46256771	Chr01-534	140	0.519	+	Intergenic	Potri.001G431800	12237	31.5	0.5	63		AT1G38131.1	O-fucosyltransferase family protein
Chr11	1931527	1931583	Chr11-186	135.8	0.75	+	promoter-TSS (ID=Potri.011G023200.1.v3.0.exon.2;Parent=Potri.011G023200.1.v3.0;pacid=27000611)	Potri.011G023200	-513	31.5	0.5	63	GO:0016788,GO:0006629	AT5G40990.1	GDSL lipase 1
Chr07	9545464	9545520	Chr07-170	135.8	0.635	+	Intergenic	Potri.007G072800	-3380	31.5	0.5	63		AT1G63470.1	AT hook motif DNA-binding family protein
Chr14	11484543	11484599	Chr14-170	133.7	0.688	+	Intergenic	Potri.014G149800	2316	31.5	0.5	63	GO:0005515	AT5G03070.1	importin alpha isoform 9
Chr12	1741173	1741229	Chr12-161	133.7	0.66	+	TTS (ID=Potri.012G018800.1.v3.0.exon.1;Parent=Potri.012G018800.1.v3.0;pacid=27049498)	Potri.012G018800	3166	31.5	0.5	63		AT1G02040.1	C2H2-type zinc finger family protein
scaffold_69	36163	36219	scaffold_69-1	133.7	0.644	+	Intergenic	Potri.T067100	-7732	31.5	0.5	63		AT3G12587.1	Oligosaccaryltransferase
Chr17	13999288	13999344	Chr17-19	3587.9	0.669	+	Intergenic	Potri.017G128900	2112	942	15	62.8	GO:0004650,GO:0005975	AT3G16850.1	Pectin lyase-like superfamily protein
Chr10	12805483	12805539	Chr10-86	411.6	0.756	+	promoter-TSS (ID=Potri.010G108700.2.v3.0.exon.2;Parent=Potri.010G108700.2.v3.0;pacid=26980159)	Potri.010G108700	84	94	1.5	62.6667	GO:0005515	AT3G09890.1	Ankyrin repeat family protein
Chr16	5497015	5497071	Chr16-33	405.3	0.796	+	TTS (ID=Potri.016G073400.1.v3.0.exon.1;Parent=Potri.016G073400.1.v3.0;pacid=27011659)	Potri.016G073400	758	94	1.5	62.6667		AT4G39460.1	S-adenosylmethionine carrier 1
Chr04	8043326	8043382	Chr04-54	398.9	0.621	+	promoter-TSS (ID=Potri.004G094200.1.v3.0.exon.1;Parent=Potri.004G094200.1.v3.0;pacid=26991874)	Potri.004G094200	99	94	1.5	62.6667	GO:0005525,GO:0007264,GO:0005622	AT4G28950.1	RHO-related protein from plants 9
Chr08	629052	629108	Chr08-22	939.9	0.65	+	exon (ID=Potri.008G011300.1.v3.0.exon.1;Parent=Potri.008G011300.1.v3.0;pacid=27039096, exon 1 of 1)	Potri.008G011300	106	219	3.5	62.5714		AT2G45120.1	C2H2-like zinc finger protein
Chr09	10693093	10693149	Chr09-36	555.9	0.663	+	Intergenic	Potri.009G131900	-5366	125	2	62.5		AT5G14010.1	C2H2 and C2HC zinc fingers superfamily protein
Chr03	7254870	7254926	Chr03-103	278	0.618	+	promoter-TSS (ID=Potri.003G049300.1.v3.0.exon.2;Parent=Potri.003G049300.1.v3.0;pacid=26999606)	Potri.003G049300	-357	62.5	1	62.5		AT5G24630.5	double-stranded DNA binding
scaffold_51	88990	89046	scaffold_51-1	278	0.755	+	Intergenic	Potri.T056400	113497	62.5	1	62.5		AT5G11530.1	embryonic flower 1 (EMF1)
Chr10	13831353	13831409	Chr10-122	269.5	0.75	+	promoter-TSS (ID=Potri.010G121800.1.v3.0.exon.1;Parent=Potri.010G121800.1.v3.0;pacid=26978807)	Potri.010G121800	-451	62.5	1	62.5		AT4G38360.2	Protein of unknown function (DUF300)
Chr03	17538094	17538150	Chr03-111	265.2	0.667	+	Intergenic	Potri.003G164800	-7104	62.5	1	62.5	GO:0072488,GO:0016020,GO:0008519	AT1G64780.1	ammonium transporter 1;2
Chr01	39593932	39593988	Chr01-252	265.2	0.656	+	Intergenic	Potri.001G379900	1689	62.5	1	62.5	GO:0005515	AT1G69400.1	Transducin/WD40 repeat-like superfamily protein
Chr02	10772682	10772738	Chr02-174	261	0.753	+	Intergenic	Potri.002G144800	1229	62.5	1	62.5	GO:0004601,GO:0020037,GO:0006979,GO:0055114	AT2G34060.1	Peroxidase superfamily protein
Chr13	11606667	11606723	Chr13-46	398.9	0.738	+	promoter-TSS (ID=Potri.013G102600.1.v3.0.exon.2;Parent=Potri.013G102600.1.v3.0;pacid=26993983)	Potri.013G102600	206	93.5	1.5	62.3333	GO:0016747	AT5G39050.1	HXXXD-type acyl-transferase family protein
Chr13	6988839	6988895	Chr13-11	7037.9	0.687	+	promoter-TSS (ID=Potri.013G080100.1.v3.0.exon.2;Parent=Potri.013G080100.1.v3.0;pacid=26995221)	Potri.013G080100	-8	1619.5	26	62.2885	GO:0000156,GO:0000160,GO:0006355,GO:0003677	AT4G18020.1	CheY-like two-component responsive regulator family protein
Chr03	10045970	10046026	Chr03-13	1065.1	0.608	+	promoter-TSS (ID=Potri.003G071800.1.v3.0.exon.1;Parent=Potri.003G071800.1.v3.0;pacid=26999564)	Potri.003G071800	-522	249	4	62.25		AT2G47210.1	myb-like transcription factor family protein
Chr12	10445325	10445381	Chr12-37	579.2	0.727	+	TTS (ID=Potri.012G078600.1.v3.0.exon.2;Parent=Potri.012G078600.1.v3.0;pacid=27048793)	Potri.012G078600	157	124.5	2	62.25	GO:0005515,GO:0007165,GO:0005622,GO:0045087,GO:0031224,GO:0004888	AT1G27170.1	transmembrane receptors;ATP binding
[truncated: 17,100 more rows]

## Sheet: Table S3
Table S3. Overlap of PagGRF15 target genes and significant differentially expressed genes in PagGRF15 overexpression plants.
[truncated: 1,242 more rows]

[truncated: 2 more sheets: Table S4, Table S5]
